# Supplementary material
Source: publisher figshare collection journal article supplement (https://springernature.figshare.com/ndownloader/files/30736253)
Supplement: Supplementary file 1 [file 30736253]

sample_ID	site	Lat	Lon	day	month	year	predator	prey_code	prey_ID	common_name	count.16S	count.COI	DNA_diet_fraction	DNA_diet_percent	Lab	Bioinformatician	File
Pv12.001	Fraser	49.1204	-123.2104	19	5	2012	Harbour seal	ALOSAP	Alosa_sapidissima	American_Shad	1376	NA	0.9731	97.31	UBC	Thomas	dna_new_BC_2011-12-13.csv
Pv12.001	Fraser	49.1204	-123.2104	19	5	2012	Harbour seal	CLUPAL	Clupea_pallasii	Pacific_Herring	23	NA	0.0163	1.63	UBC	Thomas	dna_new_BC_2011-12-13.csv
Pv12.001	Fraser	49.1204	-123.2104	19	5	2012	Harbour seal	METMAG	Metacarcinus_magister	Dungeness_Crab	15	NA	0.0106	1.06	UBC	Thomas	dna_new_BC_2011-12-13.csv
Pv12.002	Fraser	49.1204	-123.2104	19	5	2012	Harbour seal	CLUPAL	Clupea_pallasii	Pacific_Herring	993	NA	0.2859	28.59	UBC	Thomas	dna_new_BC_2011-12-13.csv
Pv12.002	Fraser	49.1204	-123.2104	19	5	2012	Harbour seal	GASACU	Gasterosteus_aculeatus	Threespine_Stickleback	2480	NA	0.7141	71.41	UBC	Thomas	dna_new_BC_2011-12-13.csv
Pv12.003	Fraser	49.1204	-123.2104	19	5	2012	Harbour seal	ALOSAP	Alosa_sapidissima	American_Shad	1	NA	0.0385	3.85	UBC	Thomas	dna_new_BC_2011-12-13.csv
Pv12.003	Fraser	49.1204	-123.2104	19	5	2012	Harbour seal	AMMHEX	Ammodytes_hexapterus	Pacific_Sand_Lance	1	NA	0.0385	3.85	UBC	Thomas	dna_new_BC_2011-12-13.csv
Pv12.003	Fraser	49.1204	-123.2104	19	5	2012	Harbour seal	CLUPAL	Clupea_pallasii	Pacific_Herring	12	NA	0.4615	46.15	UBC	Thomas	dna_new_BC_2011-12-13.csv
Pv12.003	Fraser	49.1204	-123.2104	19	5	2012	Harbour seal	HYDCOL	Hydrolagus_colliei	Spotted_Ratfish	2	NA	0.0769	7.69	UBC	Thomas	dna_new_BC_2011-12-13.csv
Pv12.003	Fraser	49.1204	-123.2104	19	5	2012	Harbour seal	LUMSAG	Lumpenus_sagitta	Snake_Prickleback	2	NA	0.0769	7.69	UBC	Thomas	dna_new_BC_2011-12-13.csv
Pv12.003	Fraser	49.1204	-123.2104	19	5	2012	Harbour seal	MICPRO	Microgadus_proximus	Pacific_Tomcod	1	NA	0.0385	3.85	UBC	Thomas	dna_new_BC_2011-12-13.csv
Pv12.003	Fraser	49.1204	-123.2104	19	5	2012	Harbour seal	ONCTSH	Oncorhynchus_tshawytscha	Chinook_Salmon	1	NA	0.0385	3.85	UBC	Thomas	dna_new_BC_2011-12-13.csv
Pv12.003	Fraser	49.1204	-123.2104	19	5	2012	Harbour seal	GADCHA	Gadus_chalcogrammus	Walleye_Pollock	6	NA	0.2308	23.08	UBC	Thomas	dna_new_BC_2011-12-13.csv
Pv12.004	Fraser	49.1204	-123.2104	19	5	2012	Harbour seal	CLUPAL	Clupea_pallasii	Pacific_Herring	10	NA	0.0508	5.08	UBC	Thomas	dna_new_BC_2011-12-13.csv
Pv12.004	Fraser	49.1204	-123.2104	19	5	2012	Harbour seal	GADMAC	Gadus_macrocephalus	Pacific_Cod	168	NA	0.8528	85.28	UBC	Thomas	dna_new_BC_2011-12-13.csv
Pv12.004	Fraser	49.1204	-123.2104	19	5	2012	Harbour seal	GASACU	Gasterosteus_aculeatus	Threespine_Stickleback	3	NA	0.0152	1.52	UBC	Thomas	dna_new_BC_2011-12-13.csv
Pv12.004	Fraser	49.1204	-123.2104	19	5	2012	Harbour seal	MERPRO	Merluccius_productus	Pacific_Hake	9	NA	0.0457	4.57	UBC	Thomas	dna_new_BC_2011-12-13.csv
Pv12.004	Fraser	49.1204	-123.2104	19	5	2012	Harbour seal	ONCKIS	Oncorhynchus_kisutch	Coho_Salmon	3	3	0.0076	0.76	UBC	Thomas	dna_new_BC_2011-12-13.csv
Pv12.004	Fraser	49.1204	-123.2104	19	5	2012	Harbour seal	ONCMYK	Oncorhynchus_mykiss	Steelhead	NA	1	0.0025	0.25	UBC	Thomas	dna_new_BC_2011-12-13.csv
Pv12.004	Fraser	49.1204	-123.2104	19	5	2012	Harbour seal	ONCTSH	Oncorhynchus_tshawytscha	Chinook_Salmon	NA	2	0.0051	0.51	UBC	Thomas	dna_new_BC_2011-12-13.csv
Pv12.004	Fraser	49.1204	-123.2104	19	5	2012	Harbour seal	GADCHA	Gadus_chalcogrammus	Walleye_Pollock	4	NA	0.0203	2.03	UBC	Thomas	dna_new_BC_2011-12-13.csv
Pv12.005	Fraser	49.1204	-123.2104	19	5	2012	Harbour seal	RAJBIN	Raja_binoculata	Big_Skate	6950	NA	1.0000	100.00	UBC	Thomas	dna_new_BC_2011-12-13.csv
Pv12.006	Fraser	49.1204	-123.2104	19	5	2012	Harbour seal	CLUPAL	Clupea_pallasii	Pacific_Herring	251	NA	0.4365	43.65	UBC	Thomas	dna_new_BC_2011-12-13.csv
Pv12.006	Fraser	49.1204	-123.2104	19	5	2012	Harbour seal	ONCMYK	Oncorhynchus_mykiss	Steelhead	NA	3800	0.4052	40.52	UBC	Thomas	dna_new_BC_2011-12-13.csv
Pv12.006	Fraser	49.1204	-123.2104	19	5	2012	Harbour seal	ONCTSH	Oncorhynchus_tshawytscha	Chinook_Salmon	116	1484	0.1583	15.83	UBC	Thomas	dna_new_BC_2011-12-13.csv
Pv12.007	Fraser	49.1204	-123.2104	19	5	2012	Harbour seal	BERMAG	Berryteuthis_magister	Magister_Armhook_Squid	43	NA	0.1078	10.78	UBC	Thomas	dna_new_BC_2011-12-13.csv
Pv12.007	Fraser	49.1204	-123.2104	19	5	2012	Harbour seal	CLUPAL	Clupea_pallasii	Pacific_Herring	64	NA	0.1604	16.04	UBC	Thomas	dna_new_BC_2011-12-13.csv
Pv12.007	Fraser	49.1204	-123.2104	19	5	2012	Harbour seal	GASACU	Gasterosteus_aculeatus	Threespine_Stickleback	83	NA	0.2080	20.80	UBC	Thomas	dna_new_BC_2011-12-13.csv
Pv12.007	Fraser	49.1204	-123.2104	19	5	2012	Harbour seal	LEUSCH	Leuroglossus_schmidti	Northern_Smoothtongue	139	NA	0.3484	34.84	UBC	Thomas	dna_new_BC_2011-12-13.csv
Pv12.007	Fraser	49.1204	-123.2104	19	5	2012	Harbour seal	MERPRO	Merluccius_productus	Pacific_Hake	70	NA	0.1754	17.54	UBC	Thomas	dna_new_BC_2011-12-13.csv
Pv12.008	Fraser	49.1204	-123.2104	19	5	2012	Harbour seal	ALOSAP	Alosa_sapidissima	American_Shad	20	NA	0.0240	2.40	UBC	Thomas	dna_new_BC_2011-12-13.csv
Pv12.008	Fraser	49.1204	-123.2104	19	5	2012	Harbour seal	ANOFIM	Anoplopoma_fimbria	Sablefish	33	NA	0.0395	3.95	UBC	Thomas	dna_new_BC_2011-12-13.csv
Pv12.008	Fraser	49.1204	-123.2104	19	5	2012	Harbour seal	BERMAG	Berryteuthis_magister	Magister_Armhook_Squid	95	NA	0.1138	11.38	UBC	Thomas	dna_new_BC_2011-12-13.csv
Pv12.008	Fraser	49.1204	-123.2104	19	5	2012	Harbour seal	CLUPAL	Clupea_pallasii	Pacific_Herring	167	NA	0.2000	20.00	UBC	Thomas	dna_new_BC_2011-12-13.csv
Pv12.008	Fraser	49.1204	-123.2104	19	5	2012	Harbour seal	LEUSCH	Leuroglossus_schmidti	Northern_Smoothtongue	301	NA	0.3605	36.05	UBC	Thomas	dna_new_BC_2011-12-13.csv
Pv12.008	Fraser	49.1204	-123.2104	19	5	2012	Harbour seal	MERPRO	Merluccius_productus	Pacific_Hake	181	NA	0.2168	21.68	UBC	Thomas	dna_new_BC_2011-12-13.csv
Pv12.008	Fraser	49.1204	-123.2104	19	5	2012	Harbour seal	MICPAC	Microstomus_pacificus	Dover_Sole	38	NA	0.0455	4.55	UBC	Thomas	dna_new_BC_2011-12-13.csv
Pv12.009	Fraser	49.1204	-123.2104	19	5	2012	Harbour seal	ALOSAP	Alosa_sapidissima	American_Shad	19	NA	0.0229	2.29	UBC	Thomas	dna_new_BC_2011-12-13.csv
Pv12.009	Fraser	49.1204	-123.2104	19	5	2012	Harbour seal	CLUPAL	Clupea_pallasii	Pacific_Herring	19	NA	0.0229	2.29	UBC	Thomas	dna_new_BC_2011-12-13.csv
Pv12.009	Fraser	49.1204	-123.2104	19	5	2012	Harbour seal	HYDCOL	Hydrolagus_colliei	Spotted_Ratfish	55	NA	0.0662	6.62	UBC	Thomas	dna_new_BC_2011-12-13.csv
Pv12.009	Fraser	49.1204	-123.2104	19	5	2012	Harbour seal	LEUSCH	Leuroglossus_schmidti	Northern_Smoothtongue	714	NA	0.8592	85.92	UBC	Thomas	dna_new_BC_2011-12-13.csv
Pv12.009	Fraser	49.1204	-123.2104	19	5	2012	Harbour seal	GADCHA	Gadus_chalcogrammus	Walleye_Pollock	24	NA	0.0289	2.89	UBC	Thomas	dna_new_BC_2011-12-13.csv
Pv12.010	Fraser	49.1204	-123.2104	19	5	2012	Harbour seal	ALOSAP	Alosa_sapidissima	American_Shad	766	NA	0.3504	35.04	UBC	Thomas	dna_new_BC_2011-12-13.csv
Pv12.010	Fraser	49.1204	-123.2104	19	5	2012	Harbour seal	ONCTSH	Oncorhynchus_tshawytscha	Chinook_Salmon	1237	3405	0.5659	56.59	UBC	Thomas	dna_new_BC_2011-12-13.csv
Pv12.010	Fraser	49.1204	-123.2104	19	5	2012	Harbour seal	THAPAC	Thaleichthys_pacificus	Eulachon	183	NA	0.0837	8.37	UBC	Thomas	dna_new_BC_2011-12-13.csv
Pv12.011	Fraser	49.1204	-123.2104	19	5	2012	Harbour seal	ALOSAP	Alosa_sapidissima	American_Shad	670	NA	0.4314	43.14	UBC	Thomas	dna_new_BC_2011-12-13.csv
Pv12.011	Fraser	49.1204	-123.2104	19	5	2012	Harbour seal	CLUPAL	Clupea_pallasii	Pacific_Herring	735	NA	0.4733	47.33	UBC	Thomas	dna_new_BC_2011-12-13.csv
Pv12.011	Fraser	49.1204	-123.2104	19	5	2012	Harbour seal	HEXDEC	Hexagrammos_decagrammus	Kelp_Greenling	30	NA	0.0193	1.93	UBC	Thomas	dna_new_BC_2011-12-13.csv
Pv12.011	Fraser	49.1204	-123.2104	19	5	2012	Harbour seal	LEUSCH	Leuroglossus_schmidti	Northern_Smoothtongue	118	NA	0.0760	7.60	UBC	Thomas	dna_new_BC_2011-12-13.csv
Pv12.012	Fraser	49.1204	-123.2104	19	5	2012	Harbour seal	CLUPAL	Clupea_pallasii	Pacific_Herring	9	NA	0.0608	6.08	UBC	Thomas	dna_new_BC_2011-12-13.csv
Pv12.012	Fraser	49.1204	-123.2104	19	5	2012	Harbour seal	GASACU	Gasterosteus_aculeatus	Threespine_Stickleback	5	NA	0.0338	3.38	UBC	Thomas	dna_new_BC_2011-12-13.csv
Pv12.012	Fraser	49.1204	-123.2104	19	5	2012	Harbour seal	HYDCOL	Hydrolagus_colliei	Spotted_Ratfish	122	NA	0.8243	82.43	UBC	Thomas	dna_new_BC_2011-12-13.csv
Pv12.012	Fraser	49.1204	-123.2104	19	5	2012	Harbour seal	ONCNER	Oncorhynchus_nerka	Sockeye_Salmon	NA	5	0.0608	6.08	UBC	Thomas	dna_new_BC_2011-12-13.csv
Pv12.012	Fraser	49.1204	-123.2104	19	5	2012	Harbour seal	GADCHA	Gadus_chalcogrammus	Walleye_Pollock	3	NA	0.0203	2.03	UBC	Thomas	dna_new_BC_2011-12-13.csv
Pv12.013	Fraser	49.1204	-123.2104	19	5	2012	Harbour seal	ALOSAP	Alosa_sapidissima	American_Shad	918	NA	0.3240	32.40	UBC	Thomas	dna_new_BC_2011-12-13.csv
Pv12.013	Fraser	49.1204	-123.2104	19	5	2012	Harbour seal	CLUPAL	Clupea_pallasii	Pacific_Herring	1449	NA	0.5115	51.15	UBC	Thomas	dna_new_BC_2011-12-13.csv
Pv12.013	Fraser	49.1204	-123.2104	19	5	2012	Harbour seal	LEUSCH	Leuroglossus_schmidti	Northern_Smoothtongue	466	NA	0.1645	16.45	UBC	Thomas	dna_new_BC_2011-12-13.csv
Pv12.014	Comox	49.6016	-124.8904	23	5	2012	Harbour seal	ALOSAP	Alosa_sapidissima	American_Shad	2	NA	0.0417	4.17	UBC	Thomas	dna_new_BC_2011-12-13.csv
Pv12.014	Comox	49.6016	-124.8904	23	5	2012	Harbour seal	BERMAG	Berryteuthis_magister	Magister_Armhook_Squid	2	NA	0.0417	4.17	UBC	Thomas	dna_new_BC_2011-12-13.csv
Pv12.014	Comox	49.6016	-124.8904	23	5	2012	Harbour seal	CLUPAL	Clupea_pallasii	Pacific_Herring	19	NA	0.3958	39.58	UBC	Thomas	dna_new_BC_2011-12-13.csv
Pv12.014	Comox	49.6016	-124.8904	23	5	2012	Harbour seal	GADMAC	Gadus_macrocephalus	Pacific_Cod	1	NA	0.0208	2.08	UBC	Thomas	dna_new_BC_2011-12-13.csv
Pv12.014	Comox	49.6016	-124.8904	23	5	2012	Harbour seal	GASACU	Gasterosteus_aculeatus	Threespine_Stickleback	1	NA	0.0208	2.08	UBC	Thomas	dna_new_BC_2011-12-13.csv
Pv12.014	Comox	49.6016	-124.8904	23	5	2012	Harbour seal	HYDCOL	Hydrolagus_colliei	Spotted_Ratfish	1	NA	0.0208	2.08	UBC	Thomas	dna_new_BC_2011-12-13.csv
Pv12.014	Comox	49.6016	-124.8904	23	5	2012	Harbour seal	LEUSCH	Leuroglossus_schmidti	Northern_Smoothtongue	3	NA	0.0625	6.25	UBC	Thomas	dna_new_BC_2011-12-13.csv
Pv12.014	Comox	49.6016	-124.8904	23	5	2012	Harbour seal	MERPRO	Merluccius_productus	Pacific_Hake	4	NA	0.0833	8.33	UBC	Thomas	dna_new_BC_2011-12-13.csv
Pv12.014	Comox	49.6016	-124.8904	23	5	2012	Harbour seal	RAJBIN	Raja_binoculata	Big_Skate	1	NA	0.0208	2.08	UBC	Thomas	dna_new_BC_2011-12-13.csv
Pv12.014	Comox	49.6016	-124.8904	23	5	2012	Harbour seal	GADCHA	Gadus_chalcogrammus	Walleye_Pollock	4	NA	0.0833	8.33	UBC	Thomas	dna_new_BC_2011-12-13.csv
Pv12.014	Comox	49.6016	-124.8904	23	5	2012	Harbour seal	MICPAC	Microstomus_pacificus	Dover_Sole	1	NA	0.0208	2.08	UBC	Thomas	dna_new_BC_2011-12-13.csv
Pv12.014	Comox	49.6016	-124.8904	23	5	2012	Harbour seal	ONCNER	Oncorhynchus_nerka	Sockeye_Salmon	NA	6	0.1667	16.67	UBC	Thomas	dna_new_BC_2011-12-13.csv
Pv12.014	Comox	49.6016	-124.8904	23	5	2012	Harbour seal	PSEMEL	Psettichthys_melanostictus	Sand_Sole	1	NA	0.0208	2.08	UBC	Thomas	dna_new_BC_2011-12-13.csv
Pv12.015	Comox	49.6016	-124.8904	23	5	2012	Harbour seal	ALOSAP	Alosa_sapidissima	American_Shad	2	NA	0.0488	4.88	UBC	Thomas	dna_new_BC_2011-12-13.csv
Pv12.015	Comox	49.6016	-124.8904	23	5	2012	Harbour seal	CLUPAL	Clupea_pallasii	Pacific_Herring	12	NA	0.2927	29.27	UBC	Thomas	dna_new_BC_2011-12-13.csv
Pv12.015	Comox	49.6016	-124.8904	23	5	2012	Harbour seal	GASACU	Gasterosteus_aculeatus	Threespine_Stickleback	2	NA	0.0488	4.88	UBC	Thomas	dna_new_BC_2011-12-13.csv
Pv12.015	Comox	49.6016	-124.8904	23	5	2012	Harbour seal	HYDCOL	Hydrolagus_colliei	Spotted_Ratfish	2	NA	0.0488	4.88	UBC	Thomas	dna_new_BC_2011-12-13.csv
Pv12.015	Comox	49.6016	-124.8904	23	5	2012	Harbour seal	LEPARM	Leptocottus_armatus	Pacific_Staghorn_Sculpin	1	NA	0.0244	2.44	UBC	Thomas	dna_new_BC_2011-12-13.csv
Pv12.015	Comox	49.6016	-124.8904	23	5	2012	Harbour seal	LEUSCH	Leuroglossus_schmidti	Northern_Smoothtongue	1	NA	0.0244	2.44	UBC	Thomas	dna_new_BC_2011-12-13.csv
Pv12.015	Comox	49.6016	-124.8904	23	5	2012	Harbour seal	MERPRO	Merluccius_productus	Pacific_Hake	1	NA	0.0244	2.44	UBC	Thomas	dna_new_BC_2011-12-13.csv
Pv12.015	Comox	49.6016	-124.8904	23	5	2012	Harbour seal	ONCNER	Oncorhynchus_nerka	Sockeye_Salmon	1	834	0.1463	14.63	UBC	Thomas	dna_new_BC_2011-12-13.csv
Pv12.015	Comox	49.6016	-124.8904	23	5	2012	Harbour seal	NA	Lepidopsetta_bilineata_OR_ Platichthys_stellatus	Rock_Sole_OR_Starry_Flounder	5	NA	0.1220	12.20	UBC	Thomas	dna_new_BC_2011-12-13.csv
Pv12.015	Comox	49.6016	-124.8904	23	5	2012	Harbour seal	RAJBIN	Raja_binoculata	Big_Skate	3	NA	0.0732	7.32	UBC	Thomas	dna_new_BC_2011-12-13.csv
Pv12.015	Comox	49.6016	-124.8904	23	5	2012	Harbour seal	GADCHA	Gadus_chalcogrammus	Walleye_Pollock	6	NA	0.1463	14.63	UBC	Thomas	dna_new_BC_2011-12-13.csv
Pv12.016	Comox	49.6016	-124.8904	23	5	2012	Harbour seal	CLUPAL	Clupea_pallasii	Pacific_Herring	1436	NA	0.9863	98.63	UBC	Thomas	dna_new_BC_2011-12-13.csv
Pv12.016	Comox	49.6016	-124.8904	23	5	2012	Harbour seal	ONCGOR	Oncorhynchus_gorbuscha	Pink_Salmon	NA	5	0.0007	0.07	UBC	Thomas	dna_new_BC_2011-12-13.csv
Pv12.016	Comox	49.6016	-124.8904	23	5	2012	Harbour seal	ONCKET	Oncorhynchus_keta	Chum_Salmon	NA	4	0.0006	0.06	UBC	Thomas	dna_new_BC_2011-12-13.csv
Pv12.016	Comox	49.6016	-124.8904	23	5	2012	Harbour seal	ONCKIS	Oncorhynchus_kisutch	Coho_Salmon	20	19	0.0028	0.28	UBC	Thomas	dna_new_BC_2011-12-13.csv
Pv12.016	Comox	49.6016	-124.8904	23	5	2012	Harbour seal	ONCMYK	Oncorhynchus_mykiss	Steelhead	NA	17	0.0025	0.25	UBC	Thomas	dna_new_BC_2011-12-13.csv
Pv12.016	Comox	49.6016	-124.8904	23	5	2012	Harbour seal	ONCNER	Oncorhynchus_nerka	Sockeye_Salmon	NA	1	0.0001	0.01	UBC	Thomas	dna_new_BC_2011-12-13.csv
Pv12.016	Comox	49.6016	-124.8904	23	5	2012	Harbour seal	ONCTSH	Oncorhynchus_tshawytscha	Chinook_Salmon	NA	48	0.0070	0.70	UBC	Thomas	dna_new_BC_2011-12-13.csv
Pv12.017	Comox	49.6016	-124.8904	23	5	2012	Harbour seal	CLUPAL	Clupea_pallasii	Pacific_Herring	14	NA	0.1029	10.29	UBC	Thomas	dna_new_BC_2011-12-13.csv
Pv12.017	Comox	49.6016	-124.8904	23	5	2012	Harbour seal	CYMAGG	Cymatogaster_aggregata	Shiner_Surfperch	6	NA	0.0441	4.41	UBC	Thomas	dna_new_BC_2011-12-13.csv
Pv12.017	Comox	49.6016	-124.8904	23	5	2012	Harbour seal	LUMSAG	Lumpenus_sagitta	Snake_Prickleback	96	NA	0.7059	70.59	UBC	Thomas	dna_new_BC_2011-12-13.csv
Pv12.017	Comox	49.6016	-124.8904	23	5	2012	Harbour seal	ONCGOR	Oncorhynchus_gorbuscha	Pink_Salmon	NA	1558	0.1103	11.03	UBC	Thomas	dna_new_BC_2011-12-13.csv
Pv12.017	Comox	49.6016	-124.8904	23	5	2012	Harbour seal	RAJBIN	Raja_binoculata	Big_Skate	3	NA	0.0221	2.21	UBC	Thomas	dna_new_BC_2011-12-13.csv
Pv12.017	Comox	49.6016	-124.8904	23	5	2012	Harbour seal	GADCHA	Gadus_chalcogrammus	Walleye_Pollock	2	NA	0.0147	1.47	UBC	Thomas	dna_new_BC_2011-12-13.csv
Pv12.018	Comox	49.6016	-124.8904	23	5	2012	Harbour seal	ALOSAP	Alosa_sapidissima	American_Shad	2	NA	0.0645	6.45	UBC	Thomas	dna_new_BC_2011-12-13.csv
Pv12.018	Comox	49.6016	-124.8904	23	5	2012	Harbour seal	BERMAG	Berryteuthis_magister	Magister_Armhook_Squid	1	NA	0.0323	3.23	UBC	Thomas	dna_new_BC_2011-12-13.csv
Pv12.018	Comox	49.6016	-124.8904	23	5	2012	Harbour seal	CLUPAL	Clupea_pallasii	Pacific_Herring	10	NA	0.3226	32.26	UBC	Thomas	dna_new_BC_2011-12-13.csv
Pv12.018	Comox	49.6016	-124.8904	23	5	2012	Harbour seal	GASACU	Gasterosteus_aculeatus	Threespine_Stickleback	1	NA	0.0323	3.23	UBC	Thomas	dna_new_BC_2011-12-13.csv
Pv12.018	Comox	49.6016	-124.8904	23	5	2012	Harbour seal	LEUSCH	Leuroglossus_schmidti	Northern_Smoothtongue	1	NA	0.0323	3.23	UBC	Thomas	dna_new_BC_2011-12-13.csv
Pv12.018	Comox	49.6016	-124.8904	23	5	2012	Harbour seal	MERPRO	Merluccius_productus	Pacific_Hake	1	NA	0.0323	3.23	UBC	Thomas	dna_new_BC_2011-12-13.csv
Pv12.018	Comox	49.6016	-124.8904	23	5	2012	Harbour seal	METMAG	Metacarcinus_magister	Dungeness_Crab	1	NA	0.0323	3.23	UBC	Thomas	dna_new_BC_2011-12-13.csv
Pv12.018	Comox	49.6016	-124.8904	23	5	2012	Harbour seal	ONCKIS	Oncorhynchus_kisutch	Coho_Salmon	NA	1	0.0161	1.61	UBC	Thomas	dna_new_BC_2011-12-13.csv
Pv12.018	Comox	49.6016	-124.8904	23	5	2012	Harbour seal	ONCMYK	Oncorhynchus_mykiss	Steelhead	NA	2	0.0323	3.23	UBC	Thomas	dna_new_BC_2011-12-13.csv
Pv12.018	Comox	49.6016	-124.8904	23	5	2012	Harbour seal	ONCNER	Oncorhynchus_nerka	Sockeye_Salmon	3	5	0.0806	8.06	UBC	Thomas	dna_new_BC_2011-12-13.csv
Pv12.018	Comox	49.6016	-124.8904	23	5	2012	Harbour seal	ONCTSH	Oncorhynchus_tshawytscha	Chinook_Salmon	1	4	0.0645	6.45	UBC	Thomas	dna_new_BC_2011-12-13.csv
Pv12.018	Comox	49.6016	-124.8904	23	5	2012	Harbour seal	RAJBIN	Raja_binoculata	Big_Skate	1	NA	0.0323	3.23	UBC	Thomas	dna_new_BC_2011-12-13.csv
Pv12.018	Comox	49.6016	-124.8904	23	5	2012	Harbour seal	GADCHA	Gadus_chalcogrammus	Walleye_Pollock	7	NA	0.2258	22.58	UBC	Thomas	dna_new_BC_2011-12-13.csv
Pv12.019	Comox	49.6016	-124.8904	23	5	2012	Harbour seal	CLUPAL	Clupea_pallasii	Pacific_Herring	509	NA	0.9138	91.38	UBC	Thomas	dna_new_BC_2011-12-13.csv
Pv12.019	Comox	49.6016	-124.8904	23	5	2012	Harbour seal	CYMAGG	Cymatogaster_aggregata	Shiner_Surfperch	42	NA	0.0754	7.54	UBC	Thomas	dna_new_BC_2011-12-13.csv
Pv12.019	Comox	49.6016	-124.8904	23	5	2012	Harbour seal	GADCHA	Gadus_chalcogrammus	Walleye_Pollock	6	NA	0.0108	1.08	UBC	Thomas	dna_new_BC_2011-12-13.csv
Pv12.020	Comox	49.6016	-124.8904	23	5	2012	Harbour seal	CLUPAL	Clupea_pallasii	Pacific_Herring	1024	NA	0.9856	98.56	UBC	Thomas	dna_new_BC_2011-12-13.csv
Pv12.020	Comox	49.6016	-124.8904	23	5	2012	Harbour seal	GADCHA	Gadus_chalcogrammus	Walleye_Pollock	15	NA	0.0144	1.44	UBC	Thomas	dna_new_BC_2011-12-13.csv
Pv12.021	Comox	49.6016	-124.8904	23	5	2012	Harbour seal	BERMAG	Berryteuthis_magister	Magister_Armhook_Squid	130	NA	0.0674	6.74	UBC	Thomas	dna_new_BC_2011-12-13.csv
Pv12.021	Comox	49.6016	-124.8904	23	5	2012	Harbour seal	CLUPAL	Clupea_pallasii	Pacific_Herring	1800	NA	0.9326	93.26	UBC	Thomas	dna_new_BC_2011-12-13.csv
Pv12.022	Comox	49.6016	-124.8904	23	5	2012	Harbour seal	BERMAG	Berryteuthis_magister	Magister_Armhook_Squid	76	NA	0.1078	10.78	UBC	Thomas	dna_new_BC_2011-12-13.csv
Pv12.022	Comox	49.6016	-124.8904	23	5	2012	Harbour seal	GADCHA	Gadus_chalcogrammus	Walleye_Pollock	8	NA	0.0113	1.13	UBC	Thomas	dna_new_BC_2011-12-13.csv
Pv12.022	Comox	49.6016	-124.8904	23	5	2012	Harbour seal	CLUPAL	Clupea_pallasii	Pacific_Herring	621	NA	0.8809	88.09	UBC	Thomas	dna_new_BC_2011-12-13.csv
Pv12.024	Comox	49.6016	-124.8904	23	5	2012	Harbour seal	GASACU	Gasterosteus_aculeatus	Threespine_Stickleback	1	NA	0.0370	3.70	UBC	Thomas	dna_new_BC_2011-12-13.csv
Pv12.024	Comox	49.6016	-124.8904	23	5	2012	Harbour seal	MERPRO	Merluccius_productus	Pacific_Hake	2	NA	0.0741	7.41	UBC	Thomas	dna_new_BC_2011-12-13.csv
Pv12.024	Comox	49.6016	-124.8904	23	5	2012	Harbour seal	ONCKIS	Oncorhynchus_kisutch	Coho_Salmon	1	NA	0.0370	3.70	UBC	Thomas	dna_new_BC_2011-12-13.csv
Pv12.024	Comox	49.6016	-124.8904	23	5	2012	Harbour seal	ONCTSH	Oncorhynchus_tshawytscha	Chinook_Salmon	2	NA	0.0741	7.41	UBC	Thomas	dna_new_BC_2011-12-13.csv
Pv12.024	Comox	49.6016	-124.8904	23	5	2012	Harbour seal	PORNOT	Porichthys_notatus	Plainfin_Midshipman	1	NA	0.0370	3.70	UBC	Thomas	dna_new_BC_2011-12-13.csv
Pv12.024	Comox	49.6016	-124.8904	23	5	2012	Harbour seal	GADCHA	Gadus_chalcogrammus	Walleye_Pollock	5	NA	0.1852	18.52	UBC	Thomas	dna_new_BC_2011-12-13.csv
Pv12.024	Comox	49.6016	-124.8904	23	5	2012	Harbour seal	CLUPAL	Clupea_pallasii	Pacific_Herring	15	NA	0.5556	55.56	UBC	Thomas	dna_new_BC_2011-12-13.csv
Pv12.025	Comox	49.6016	-124.8904	23	5	2012	Harbour seal	NA	Lepidopsetta_bilineata_OR_ Platichthys_stellatus	Rock_Sole_OR_Starry_Flounder	1	NA	0.0147	1.47	UBC	Thomas	dna_new_BC_2011-12-13.csv
Pv12.025	Comox	49.6016	-124.8904	23	5	2012	Harbour seal	RAJBIN	Raja_binoculata	Big_Skate	4	NA	0.0588	5.88	UBC	Thomas	dna_new_BC_2011-12-13.csv
Pv12.025	Comox	49.6016	-124.8904	23	5	2012	Harbour seal	GADCHA	Gadus_chalcogrammus	Walleye_Pollock	7	NA	0.1029	10.29	UBC	Thomas	dna_new_BC_2011-12-13.csv
Pv12.025	Comox	49.6016	-124.8904	23	5	2012	Harbour seal	MICPRO	Microgadus_proximus	Pacific_Tomcod	1	NA	0.0147	1.47	UBC	Thomas	dna_new_BC_2011-12-13.csv
Pv12.025	Comox	49.6016	-124.8904	23	5	2012	Harbour seal	ONCNER	Oncorhynchus_nerka	Sockeye_Salmon	NA	5	0.1324	13.24	UBC	Thomas	dna_new_BC_2011-12-13.csv
Pv12.025	Comox	49.6016	-124.8904	23	5	2012	Harbour seal	LEUSCH	Leuroglossus_schmidti	Northern_Smoothtongue	1	NA	0.0147	1.47	UBC	Thomas	dna_new_BC_2011-12-13.csv
Pv12.025	Comox	49.6016	-124.8904	23	5	2012	Harbour seal	LUMSAG	Lumpenus_sagitta	Snake_Prickleback	2	NA	0.0294	2.94	UBC	Thomas	dna_new_BC_2011-12-13.csv
Pv12.025	Comox	49.6016	-124.8904	23	5	2012	Harbour seal	MERPRO	Merluccius_productus	Pacific_Hake	1	NA	0.0147	1.47	UBC	Thomas	dna_new_BC_2011-12-13.csv
Pv12.025	Comox	49.6016	-124.8904	23	5	2012	Harbour seal	MICPAC	Microstomus_pacificus	Dover_Sole	1	NA	0.0147	1.47	UBC	Thomas	dna_new_BC_2011-12-13.csv
Pv12.025	Comox	49.6016	-124.8904	23	5	2012	Harbour seal	PARVET	Parophrys_vetulus	English_Sole	1	NA	0.0147	1.47	UBC	Thomas	dna_new_BC_2011-12-13.csv
Pv12.025	Comox	49.6016	-124.8904	23	5	2012	Harbour seal	ALOSAP	Alosa_sapidissima	American_Shad	5	NA	0.0735	7.35	UBC	Thomas	dna_new_BC_2011-12-13.csv
Pv12.025	Comox	49.6016	-124.8904	23	5	2012	Harbour seal	LAMAYR	Lampetra_ayresii	River_Lamprey	1	NA	0.0147	1.47	UBC	Thomas	dna_new_BC_2011-12-13.csv
Pv12.025	Comox	49.6016	-124.8904	23	5	2012	Harbour seal	LOLOPA	Loligo_opalescens	California_Market_Squid	1	NA	0.0147	1.47	UBC	Thomas	dna_new_BC_2011-12-13.csv
Pv12.025	Comox	49.6016	-124.8904	23	5	2012	Harbour seal	CLUPAL	Clupea_pallasii	Pacific_Herring	31	NA	0.4559	45.59	UBC	Thomas	dna_new_BC_2011-12-13.csv
Pv12.025	Comox	49.6016	-124.8904	23	5	2012	Harbour seal	BATINT	Bathyraja_interrupta	Sandpaper_Skate	1	NA	0.0147	1.47	UBC	Thomas	dna_new_BC_2011-12-13.csv
Pv12.025	Comox	49.6016	-124.8904	23	5	2012	Harbour seal	BERMAG	Berryteuthis_magister	Magister_Armhook_Squid	1	NA	0.0147	1.47	UBC	Thomas	dna_new_BC_2011-12-13.csv
Pv12.026	Comox	49.6016	-124.8904	23	5	2012	Harbour seal	CLUPAL	Clupea_pallasii	Pacific_Herring	581	NA	1.0000	100.00	UBC	Thomas	dna_new_BC_2011-12-13.csv
Pv12.027	Comox	49.6016	-124.8904	23	5	2012	Harbour seal	CLUPAL	Clupea_pallasii	Pacific_Herring	1248	NA	1.0000	100.00	UBC	Thomas	dna_new_BC_2011-12-13.csv
Pv12.028	Comox	49.6016	-124.8904	23	5	2012	Harbour seal	CLUPAL	Clupea_pallasii	Pacific_Herring	24	NA	0.0376	3.76	UBC	Thomas	dna_new_BC_2011-12-13.csv
Pv12.028	Comox	49.6016	-124.8904	23	5	2012	Harbour seal	MERPRO	Merluccius_productus	Pacific_Hake	604	NA	0.9467	94.67	UBC	Thomas	dna_new_BC_2011-12-13.csv
Pv12.028	Comox	49.6016	-124.8904	23	5	2012	Harbour seal	GADCHA	Gadus_chalcogrammus	Walleye_Pollock	10	NA	0.0157	1.57	UBC	Thomas	dna_new_BC_2011-12-13.csv
Pv12.029	Comox	49.6016	-124.8904	23	5	2012	Harbour seal	BATINT	Bathyraja_interrupta	Sandpaper_Skate	1	NA	0.0278	2.78	UBC	Thomas	dna_new_BC_2011-12-13.csv
Pv12.029	Comox	49.6016	-124.8904	23	5	2012	Harbour seal	CLUPAL	Clupea_pallasii	Pacific_Herring	19	NA	0.5278	52.78	UBC	Thomas	dna_new_BC_2011-12-13.csv
Pv12.029	Comox	49.6016	-124.8904	23	5	2012	Harbour seal	CYMAGG	Cymatogaster_aggregata	Shiner_Surfperch	1	NA	0.0278	2.78	UBC	Thomas	dna_new_BC_2011-12-13.csv
Pv12.029	Comox	49.6016	-124.8904	23	5	2012	Harbour seal	GASACU	Gasterosteus_aculeatus	Threespine_Stickleback	2	NA	0.0556	5.56	UBC	Thomas	dna_new_BC_2011-12-13.csv
Pv12.029	Comox	49.6016	-124.8904	23	5	2012	Harbour seal	LEUSCH	Leuroglossus_schmidti	Northern_Smoothtongue	1	NA	0.0278	2.78	UBC	Thomas	dna_new_BC_2011-12-13.csv
Pv12.029	Comox	49.6016	-124.8904	23	5	2012	Harbour seal	MERPRO	Merluccius_productus	Pacific_Hake	3	NA	0.0833	8.33	UBC	Thomas	dna_new_BC_2011-12-13.csv
Pv12.029	Comox	49.6016	-124.8904	23	5	2012	Harbour seal	ONCGOR	Oncorhynchus_gorbuscha	Pink_Salmon	NA	36	0.0030	0.30	UBC	Thomas	dna_new_BC_2011-12-13.csv
Pv12.029	Comox	49.6016	-124.8904	23	5	2012	Harbour seal	ONCKET	Oncorhynchus_keta	Chum_Salmon	NA	1620	0.1359	13.59	UBC	Thomas	dna_new_BC_2011-12-13.csv
Pv12.029	Comox	49.6016	-124.8904	23	5	2012	Harbour seal	NA	Lepidopsetta_bilineata_OR_ Platichthys_stellatus	Rock_Sole_OR_Starry_Flounder	1	NA	0.0278	2.78	UBC	Thomas	dna_new_BC_2011-12-13.csv
Pv12.029	Comox	49.6016	-124.8904	23	5	2012	Harbour seal	RAJBIN	Raja_binoculata	Big_Skate	1	NA	0.0278	2.78	UBC	Thomas	dna_new_BC_2011-12-13.csv
Pv12.029	Comox	49.6016	-124.8904	23	5	2012	Harbour seal	GADCHA	Gadus_chalcogrammus	Walleye_Pollock	2	NA	0.0556	5.56	UBC	Thomas	dna_new_BC_2011-12-13.csv
Pv12.030	Comox	49.6016	-124.8904	23	5	2012	Harbour seal	CLUPAL	Clupea_pallasii	Pacific_Herring	23	NA	0.0417	4.17	UBC	Thomas	dna_new_BC_2011-12-13.csv
Pv12.030	Comox	49.6016	-124.8904	23	5	2012	Harbour seal	ONCMYK	Oncorhynchus_mykiss	Steelhead	NA	17880	0.9583	95.83	UBC	Thomas	dna_new_BC_2011-12-13.csv
Pv12.031	Comox	49.6016	-124.8904	23	5	2012	Harbour seal	CLUPAL	Clupea_pallasii	Pacific_Herring	897	NA	0.9814	98.14	UBC	Thomas	dna_new_BC_2011-12-13.csv
Pv12.031	Comox	49.6016	-124.8904	23	5	2012	Harbour seal	GADCHA	Gadus_chalcogrammus	Walleye_Pollock	17	NA	0.0186	1.86	UBC	Thomas	dna_new_BC_2011-12-13.csv
Pv12.032	Comox	49.6016	-124.8904	23	5	2012	Harbour seal	CLUPAL	Clupea_pallasii	Pacific_Herring	854	NA	1.0000	100.00	UBC	Thomas	dna_new_BC_2011-12-13.csv
Pv12.033	Comox	49.6016	-124.8904	23	5	2012	Harbour seal	RAJBIN	Raja_binoculata	Big_Skate	3	NA	0.0246	2.46	UBC	Thomas	dna_new_BC_2011-12-13.csv
Pv12.033	Comox	49.6016	-124.8904	23	5	2012	Harbour seal	GADCHA	Gadus_chalcogrammus	Walleye_Pollock	5	NA	0.0410	4.10	UBC	Thomas	dna_new_BC_2011-12-13.csv
Pv12.033	Comox	49.6016	-124.8904	23	5	2012	Harbour seal	CLUPAL	Clupea_pallasii	Pacific_Herring	89	NA	0.7295	72.95	UBC	Thomas	dna_new_BC_2011-12-13.csv
Pv12.033	Comox	49.6016	-124.8904	23	5	2012	Harbour seal	LEUSCH	Leuroglossus_schmidti	Northern_Smoothtongue	3	NA	0.0246	2.46	UBC	Thomas	dna_new_BC_2011-12-13.csv
Pv12.033	Comox	49.6016	-124.8904	23	5	2012	Harbour seal	ONCGOR	Oncorhynchus_gorbuscha	Pink_Salmon	NA	2476	0.0656	6.56	UBC	Thomas	dna_new_BC_2011-12-13.csv
Pv12.033	Comox	49.6016	-124.8904	23	5	2012	Harbour seal	LOLOPA	Loligo_opalescens	California_Market_Squid	9	NA	0.0738	7.38	UBC	Thomas	dna_new_BC_2011-12-13.csv
Pv12.033	Comox	49.6016	-124.8904	23	5	2012	Harbour seal	MERPRO	Merluccius_productus	Pacific_Hake	5	NA	0.0410	4.10	UBC	Thomas	dna_new_BC_2011-12-13.csv
Pv12.034	Comox	49.6016	-124.8904	23	5	2012	Harbour seal	GADCHA	Gadus_chalcogrammus	Walleye_Pollock	2684	NA	0.4290	42.90	UBC	Thomas	dna_new_BC_2011-12-13.csv
Pv12.034	Comox	49.6016	-124.8904	23	5	2012	Harbour seal	CLUPAL	Clupea_pallasii	Pacific_Herring	3572	NA	0.5710	57.10	UBC	Thomas	dna_new_BC_2011-12-13.csv
Pv12.035	Cowichan Bay	48.7562	-123.6223	25	5	2012	Harbour seal	GASACU	Gasterosteus_aculeatus	Threespine_Stickleback	7	NA	0.0105	1.05	UBC	Thomas	dna_new_BC_2011-12-13.csv
Pv12.035	Cowichan Bay	48.7562	-123.6223	25	5	2012	Harbour seal	CLUPAL	Clupea_pallasii	Pacific_Herring	658	NA	0.9895	98.95	UBC	Thomas	dna_new_BC_2011-12-13.csv
Pv12.036	Cowichan Bay	48.7562	-123.6223	25	5	2012	Harbour seal	CLUPAL	Clupea_pallasii	Pacific_Herring	16	NA	0.0160	1.60	UBC	Thomas	dna_new_BC_2011-12-13.csv
Pv12.036	Cowichan Bay	48.7562	-123.6223	25	5	2012	Harbour seal	ONCGOR	Oncorhynchus_gorbuscha	Pink_Salmon	985	NA	0.9840	98.40	UBC	Thomas	dna_new_BC_2011-12-13.csv
Pv12.037	Cowichan Bay	48.7562	-123.6223	25	5	2012	Harbour seal	CLUPAL	Clupea_pallasii	Pacific_Herring	1970	NA	1.0000	100.00	UBC	Thomas	dna_new_BC_2011-12-13.csv
Pv12.038	Fraser	49.1204	-123.2104	28	5	2012	Harbour seal	CLUPAL	Clupea_pallasii	Pacific_Herring	18	NA	0.1800	18.00	UBC	Thomas	dna_new_BC_2011-12-13.csv
Pv12.038	Fraser	49.1204	-123.2104	28	5	2012	Harbour seal	LEUSCH	Leuroglossus_schmidti	Northern_Smoothtongue	70	NA	0.7000	70.00	UBC	Thomas	dna_new_BC_2011-12-13.csv
Pv12.038	Fraser	49.1204	-123.2104	28	5	2012	Harbour seal	ONCKIS	Oncorhynchus_kisutch	Coho_Salmon	3	NA	0.0300	3.00	UBC	Thomas	dna_new_BC_2011-12-13.csv
Pv12.038	Fraser	49.1204	-123.2104	28	5	2012	Harbour seal	ONCTSH	Oncorhynchus_tshawytscha	Chinook_Salmon	2	NA	0.0200	2.00	UBC	Thomas	dna_new_BC_2011-12-13.csv
Pv12.038	Fraser	49.1204	-123.2104	28	5	2012	Harbour seal	RAJBIN	Raja_binoculata	Big_Skate	5	NA	0.0500	5.00	UBC	Thomas	dna_new_BC_2011-12-13.csv
Pv12.038	Fraser	49.1204	-123.2104	28	5	2012	Harbour seal	GADCHA	Gadus_chalcogrammus	Walleye_Pollock	2	NA	0.0200	2.00	UBC	Thomas	dna_new_BC_2011-12-13.csv
Pv12.039	Fraser	49.1204	-123.2104	28	5	2012	Harbour seal	ALOSAP	Alosa_sapidissima	American_Shad	4	NA	0.0142	1.42	UBC	Thomas	dna_new_BC_2011-12-13.csv
Pv12.039	Fraser	49.1204	-123.2104	28	5	2012	Harbour seal	CLUPAL	Clupea_pallasii	Pacific_Herring	89	NA	0.3167	31.67	UBC	Thomas	dna_new_BC_2011-12-13.csv
Pv12.039	Fraser	49.1204	-123.2104	28	5	2012	Harbour seal	MERPRO	Merluccius_productus	Pacific_Hake	3	NA	0.0107	1.07	UBC	Thomas	dna_new_BC_2011-12-13.csv
Pv12.039	Fraser	49.1204	-123.2104	28	5	2012	Harbour seal	ONCGOR	Oncorhynchus_gorbuscha	Pink_Salmon	NA	4	0.0012	0.12	UBC	Thomas	dna_new_BC_2011-12-13.csv
Pv12.039	Fraser	49.1204	-123.2104	28	5	2012	Harbour seal	ONCKET	Oncorhynchus_keta	Chum_Salmon	NA	5	0.0014	0.14	UBC	Thomas	dna_new_BC_2011-12-13.csv
Pv12.039	Fraser	49.1204	-123.2104	28	5	2012	Harbour seal	ONCKIS	Oncorhynchus_kisutch	Coho_Salmon	6	34	0.0098	0.98	UBC	Thomas	dna_new_BC_2011-12-13.csv
Pv12.039	Fraser	49.1204	-123.2104	28	5	2012	Harbour seal	ONCMYK	Oncorhynchus_mykiss	Steelhead	NA	8	0.0023	0.23	UBC	Thomas	dna_new_BC_2011-12-13.csv
Pv12.039	Fraser	49.1204	-123.2104	28	5	2012	Harbour seal	ONCTSH	Oncorhynchus_tshawytscha	Chinook_Salmon	NA	23	0.0066	0.66	UBC	Thomas	dna_new_BC_2011-12-13.csv
Pv12.039	Fraser	49.1204	-123.2104	28	5	2012	Harbour seal	PARVET	Parophrys_vetulus	English_Sole	169	NA	0.6014	60.14	UBC	Thomas	dna_new_BC_2011-12-13.csv
Pv12.039	Fraser	49.1204	-123.2104	28	5	2012	Harbour seal	GADCHA	Gadus_chalcogrammus	Walleye_Pollock	10	NA	0.0356	3.56	UBC	Thomas	dna_new_BC_2011-12-13.csv
Pv12.040	Fraser	49.1204	-123.2104	28	5	2012	Harbour seal	ALOSAP	Alosa_sapidissima	American_Shad	486	NA	0.1641	16.41	UBC	Thomas	dna_new_BC_2011-12-13.csv
Pv12.040	Fraser	49.1204	-123.2104	28	5	2012	Harbour seal	CLUPAL	Clupea_pallasii	Pacific_Herring	123	NA	0.0415	4.15	UBC	Thomas	dna_new_BC_2011-12-13.csv
Pv12.040	Fraser	49.1204	-123.2104	28	5	2012	Harbour seal	GASACU	Gasterosteus_aculeatus	Threespine_Stickleback	2353	NA	0.7944	79.44	UBC	Thomas	dna_new_BC_2011-12-13.csv
Pv12.041	Fraser	49.1204	-123.2104	28	5	2012	Harbour seal	ALOSAP	Alosa_sapidissima	American_Shad	3	NA	0.0323	3.23	UBC	Thomas	dna_new_BC_2011-12-13.csv
Pv12.041	Fraser	49.1204	-123.2104	28	5	2012	Harbour seal	CLUPAL	Clupea_pallasii	Pacific_Herring	62	NA	0.6667	66.67	UBC	Thomas	dna_new_BC_2011-12-13.csv
Pv12.041	Fraser	49.1204	-123.2104	28	5	2012	Harbour seal	GASACU	Gasterosteus_aculeatus	Threespine_Stickleback	2	NA	0.0215	2.15	UBC	Thomas	dna_new_BC_2011-12-13.csv
Pv12.041	Fraser	49.1204	-123.2104	28	5	2012	Harbour seal	HYDCOL	Hydrolagus_colliei	Spotted_Ratfish	1	NA	0.0108	1.08	UBC	Thomas	dna_new_BC_2011-12-13.csv
Pv12.041	Fraser	49.1204	-123.2104	28	5	2012	Harbour seal	LEUSCH	Leuroglossus_schmidti	Northern_Smoothtongue	2	NA	0.0215	2.15	UBC	Thomas	dna_new_BC_2011-12-13.csv
Pv12.041	Fraser	49.1204	-123.2104	28	5	2012	Harbour seal	LUMSAG	Lumpenus_sagitta	Snake_Prickleback	1	NA	0.0108	1.08	UBC	Thomas	dna_new_BC_2011-12-13.csv
Pv12.041	Fraser	49.1204	-123.2104	28	5	2012	Harbour seal	MERPRO	Merluccius_productus	Pacific_Hake	4	NA	0.0430	4.30	UBC	Thomas	dna_new_BC_2011-12-13.csv
Pv12.041	Fraser	49.1204	-123.2104	28	5	2012	Harbour seal	ONCGOR	Oncorhynchus_gorbuscha	Pink_Salmon	2	3157	0.0440	4.40	UBC	Thomas	dna_new_BC_2011-12-13.csv
Pv12.041	Fraser	49.1204	-123.2104	28	5	2012	Harbour seal	ONCKET	Oncorhynchus_keta	Chum_Salmon	3	1977	0.0275	2.75	UBC	Thomas	dna_new_BC_2011-12-13.csv
Pv12.041	Fraser	49.1204	-123.2104	28	5	2012	Harbour seal	ONCKIS	Oncorhynchus_kisutch	Coho_Salmon	5	2142	0.0298	2.98	UBC	Thomas	dna_new_BC_2011-12-13.csv
Pv12.041	Fraser	49.1204	-123.2104	28	5	2012	Harbour seal	ONCTSH	Oncorhynchus_tshawytscha	Chinook_Salmon	1	1212	0.0169	1.69	UBC	Thomas	dna_new_BC_2011-12-13.csv
Pv12.041	Fraser	49.1204	-123.2104	28	5	2012	Harbour seal	SPITHA	Spirinchus_thaleichthys	Longfin_Smelt	1	NA	0.0108	1.08	UBC	Thomas	dna_new_BC_2011-12-13.csv
Pv12.041	Fraser	49.1204	-123.2104	28	5	2012	Harbour seal	GADCHA	Gadus_chalcogrammus	Walleye_Pollock	6	NA	0.0645	6.45	UBC	Thomas	dna_new_BC_2011-12-13.csv
Pv12.042	Fraser	49.1204	-123.2104	28	5	2012	Harbour seal	CLUPAL	Clupea_pallasii	Pacific_Herring	500	NA	0.6266	62.66	UBC	Thomas	dna_new_BC_2011-12-13.csv
Pv12.042	Fraser	49.1204	-123.2104	28	5	2012	Harbour seal	GASACU	Gasterosteus_aculeatus	Threespine_Stickleback	32	NA	0.0401	4.01	UBC	Thomas	dna_new_BC_2011-12-13.csv
Pv12.042	Fraser	49.1204	-123.2104	28	5	2012	Harbour seal	ONCTSH	Oncorhynchus_tshawytscha	Chinook_Salmon	191	6680	0.3221	32.21	UBC	Thomas	dna_new_BC_2011-12-13.csv
Pv12.042	Fraser	49.1204	-123.2104	28	5	2012	Harbour seal	GADCHA	Gadus_chalcogrammus	Walleye_Pollock	9	NA	0.0113	1.13	UBC	Thomas	dna_new_BC_2011-12-13.csv
Pv12.043	Belle Chain	48.8323	-123.1984	29	5	2012	Harbour seal	CLUPAL	Clupea_pallasii	Pacific_Herring	4894	NA	1.0000	100.00	UBC	Thomas	dna_new_BC_2011-12-13.csv
Pv12.044	Fraser	49.1204	-123.2104	9	6	2012	Harbour seal	BATINT	Bathyraja_interrupta	Sandpaper_Skate	214	NA	0.0889	8.89	UBC	Thomas	dna_new_BC_2011-12-13.csv
Pv12.044	Fraser	49.1204	-123.2104	9	6	2012	Harbour seal	CLUPAL	Clupea_pallasii	Pacific_Herring	25	NA	0.0104	1.04	UBC	Thomas	dna_new_BC_2011-12-13.csv
Pv12.044	Fraser	49.1204	-123.2104	9	6	2012	Harbour seal	HYDCOL	Hydrolagus_colliei	Spotted_Ratfish	737	NA	0.3062	30.62	UBC	Thomas	dna_new_BC_2011-12-13.csv
Pv12.044	Fraser	49.1204	-123.2104	9	6	2012	Harbour seal	LEUSCH	Leuroglossus_schmidti	Northern_Smoothtongue	756	NA	0.3141	31.41	UBC	Thomas	dna_new_BC_2011-12-13.csv
Pv12.044	Fraser	49.1204	-123.2104	9	6	2012	Harbour seal	MERPRO	Merluccius_productus	Pacific_Hake	144	NA	0.0598	5.98	UBC	Thomas	dna_new_BC_2011-12-13.csv
Pv12.044	Fraser	49.1204	-123.2104	9	6	2012	Harbour seal	MICPAC	Microstomus_pacificus	Dover_Sole	408	NA	0.1695	16.95	UBC	Thomas	dna_new_BC_2011-12-13.csv
Pv12.044	Fraser	49.1204	-123.2104	9	6	2012	Harbour seal	OCTRUB	Octopus_rubescens	Pacific_Red_Octopus	123	NA	0.0511	5.11	UBC	Thomas	dna_new_BC_2011-12-13.csv
Pv12.045	Fraser	49.1204	-123.2104	9	6	2012	Harbour seal	BATINT	Bathyraja_interrupta	Sandpaper_Skate	155	NA	0.1049	10.49	UBC	Thomas	dna_new_BC_2011-12-13.csv
Pv12.045	Fraser	49.1204	-123.2104	9	6	2012	Harbour seal	CLUPAL	Clupea_pallasii	Pacific_Herring	20	NA	0.0135	1.35	UBC	Thomas	dna_new_BC_2011-12-13.csv
Pv12.045	Fraser	49.1204	-123.2104	9	6	2012	Harbour seal	HYDCOL	Hydrolagus_colliei	Spotted_Ratfish	749	NA	0.5068	50.68	UBC	Thomas	dna_new_BC_2011-12-13.csv
Pv12.045	Fraser	49.1204	-123.2104	9	6	2012	Harbour seal	LEUSCH	Leuroglossus_schmidti	Northern_Smoothtongue	338	NA	0.2287	22.87	UBC	Thomas	dna_new_BC_2011-12-13.csv
Pv12.045	Fraser	49.1204	-123.2104	9	6	2012	Harbour seal	MERPRO	Merluccius_productus	Pacific_Hake	17	NA	0.0115	1.15	UBC	Thomas	dna_new_BC_2011-12-13.csv
Pv12.045	Fraser	49.1204	-123.2104	9	6	2012	Harbour seal	MICPAC	Microstomus_pacificus	Dover_Sole	171	NA	0.1157	11.57	UBC	Thomas	dna_new_BC_2011-12-13.csv
Pv12.045	Fraser	49.1204	-123.2104	9	6	2012	Harbour seal	OCTRUB	Octopus_rubescens	Pacific_Red_Octopus	28	NA	0.0189	1.89	UBC	Thomas	dna_new_BC_2011-12-13.csv
Pv12.046	Fraser	49.1204	-123.2104	9	6	2012	Harbour seal	ALOSAP	Alosa_sapidissima	American_Shad	3	NA	0.0484	4.84	UBC	Thomas	dna_new_BC_2011-12-13.csv
Pv12.046	Fraser	49.1204	-123.2104	9	6	2012	Harbour seal	CLUPAL	Clupea_pallasii	Pacific_Herring	31	NA	0.5000	50.00	UBC	Thomas	dna_new_BC_2011-12-13.csv
Pv12.046	Fraser	49.1204	-123.2104	9	6	2012	Harbour seal	GASACU	Gasterosteus_aculeatus	Threespine_Stickleback	1	NA	0.0161	1.61	UBC	Thomas	dna_new_BC_2011-12-13.csv
Pv12.046	Fraser	49.1204	-123.2104	9	6	2012	Harbour seal	HYDCOL	Hydrolagus_colliei	Spotted_Ratfish	1	NA	0.0161	1.61	UBC	Thomas	dna_new_BC_2011-12-13.csv
Pv12.046	Fraser	49.1204	-123.2104	9	6	2012	Harbour seal	LEUSCH	Leuroglossus_schmidti	Northern_Smoothtongue	1	NA	0.0161	1.61	UBC	Thomas	dna_new_BC_2011-12-13.csv
Pv12.046	Fraser	49.1204	-123.2104	9	6	2012	Harbour seal	MERPRO	Merluccius_productus	Pacific_Hake	7	NA	0.1129	11.29	UBC	Thomas	dna_new_BC_2011-12-13.csv
Pv12.046	Fraser	49.1204	-123.2104	9	6	2012	Harbour seal	ONCGOR	Oncorhynchus_gorbuscha	Pink_Salmon	2	NA	0.0323	3.23	UBC	Thomas	dna_new_BC_2011-12-13.csv
Pv12.046	Fraser	49.1204	-123.2104	9	6	2012	Harbour seal	ONCKIS	Oncorhynchus_kisutch	Coho_Salmon	2	NA	0.0323	3.23	UBC	Thomas	dna_new_BC_2011-12-13.csv
Pv12.046	Fraser	49.1204	-123.2104	9	6	2012	Harbour seal	ONCTSH	Oncorhynchus_tshawytscha	Chinook_Salmon	5	NA	0.0806	8.06	UBC	Thomas	dna_new_BC_2011-12-13.csv
Pv12.046	Fraser	49.1204	-123.2104	9	6	2012	Harbour seal	RAJBIN	Raja_binoculata	Big_Skate	1	NA	0.0161	1.61	UBC	Thomas	dna_new_BC_2011-12-13.csv
Pv12.046	Fraser	49.1204	-123.2104	9	6	2012	Harbour seal	GADCHA	Gadus_chalcogrammus	Walleye_Pollock	8	NA	0.1290	12.90	UBC	Thomas	dna_new_BC_2011-12-13.csv
Pv12.047	Fraser	49.1204	-123.2104	9	6	2012	Harbour seal	CLUPAL	Clupea_pallasii	Pacific_Herring	19	NA	0.0252	2.52	UBC	Thomas	dna_new_BC_2011-12-13.csv
Pv12.047	Fraser	49.1204	-123.2104	9	6	2012	Harbour seal	HYDCOL	Hydrolagus_colliei	Spotted_Ratfish	545	NA	0.7238	72.38	UBC	Thomas	dna_new_BC_2011-12-13.csv
Pv12.047	Fraser	49.1204	-123.2104	9	6	2012	Harbour seal	LAMAYR	Lampetra_ayresii	River_Lamprey	60	NA	0.0797	7.97	UBC	Thomas	dna_new_BC_2011-12-13.csv
Pv12.047	Fraser	49.1204	-123.2104	9	6	2012	Harbour seal	MERPRO	Merluccius_productus	Pacific_Hake	80	NA	0.1062	10.62	UBC	Thomas	dna_new_BC_2011-12-13.csv
Pv12.047	Fraser	49.1204	-123.2104	9	6	2012	Harbour seal	MICPAC	Microstomus_pacificus	Dover_Sole	40	NA	0.0531	5.31	UBC	Thomas	dna_new_BC_2011-12-13.csv
Pv12.047	Fraser	49.1204	-123.2104	9	6	2012	Harbour seal	GADCHA	Gadus_chalcogrammus	Walleye_Pollock	9	NA	0.0120	1.20	UBC	Thomas	dna_new_BC_2011-12-13.csv
Pv12.048	Fraser	49.1204	-123.2104	9	6	2012	Harbour seal	CLUPAL	Clupea_pallasii	Pacific_Herring	25	NA	0.0558	5.58	UBC	Thomas	dna_new_BC_2011-12-13.csv
Pv12.048	Fraser	49.1204	-123.2104	9	6	2012	Harbour seal	GASACU	Gasterosteus_aculeatus	Threespine_Stickleback	193	NA	0.4308	43.08	UBC	Thomas	dna_new_BC_2011-12-13.csv
Pv12.048	Fraser	49.1204	-123.2104	9	6	2012	Harbour seal	ONCGOR	Oncorhynchus_gorbuscha	Pink_Salmon	NA	3	0.0077	0.77	UBC	Thomas	dna_new_BC_2011-12-13.csv
Pv12.048	Fraser	49.1204	-123.2104	9	6	2012	Harbour seal	ONCKET	Oncorhynchus_keta	Chum_Salmon	NA	6	0.0155	1.55	UBC	Thomas	dna_new_BC_2011-12-13.csv
Pv12.048	Fraser	49.1204	-123.2104	9	6	2012	Harbour seal	ONCKIS	Oncorhynchus_kisutch	Coho_Salmon	6	12	0.0310	3.10	UBC	Thomas	dna_new_BC_2011-12-13.csv
Pv12.048	Fraser	49.1204	-123.2104	9	6	2012	Harbour seal	ONCMYK	Oncorhynchus_mykiss	Steelhead	NA	7	0.0181	1.81	UBC	Thomas	dna_new_BC_2011-12-13.csv
Pv12.048	Fraser	49.1204	-123.2104	9	6	2012	Harbour seal	ONCNER	Oncorhynchus_nerka	Sockeye_Salmon	85	1	0.0026	0.26	UBC	Thomas	dna_new_BC_2011-12-13.csv
Pv12.048	Fraser	49.1204	-123.2104	9	6	2012	Harbour seal	ONCTSH	Oncorhynchus_tshawytscha	Chinook_Salmon	5	17	0.0439	4.39	UBC	Thomas	dna_new_BC_2011-12-13.csv
Pv12.048	Fraser	49.1204	-123.2104	9	6	2012	Harbour seal	RAJBIN	Raja_binoculata	Big_Skate	6	NA	0.0134	1.34	UBC	Thomas	dna_new_BC_2011-12-13.csv
Pv12.048	Fraser	49.1204	-123.2104	9	6	2012	Harbour seal	SALSAL	Salmo_salar	Atlantic_Salmon	NA	37	0.0955	9.55	UBC	Thomas	dna_new_BC_2011-12-13.csv
Pv12.048	Fraser	49.1204	-123.2104	9	6	2012	Harbour seal	GADCHA	Gadus_chalcogrammus	Walleye_Pollock	128	NA	0.2857	28.57	UBC	Thomas	dna_new_BC_2011-12-13.csv
Pv12.049	Fraser	49.1204	-123.2104	9	6	2012	Harbour seal	CLUPAL	Clupea_pallasii	Pacific_Herring	21	NA	0.0138	1.38	UBC	Thomas	dna_new_BC_2011-12-13.csv
Pv12.049	Fraser	49.1204	-123.2104	9	6	2012	Harbour seal	RAJBIN	Raja_binoculata	Big_Skate	1502	NA	0.9862	98.62	UBC	Thomas	dna_new_BC_2011-12-13.csv
Pv12.050	Fraser	49.1204	-123.2104	9	6	2012	Harbour seal	BERMAG	Berryteuthis_magister	Magister_Armhook_Squid	363	NA	0.1172	11.72	UBC	Thomas	dna_new_BC_2011-12-13.csv
Pv12.050	Fraser	49.1204	-123.2104	9	6	2012	Harbour seal	GADCHA	Gadus_chalcogrammus	Walleye_Pollock	2734	NA	0.8828	88.28	UBC	Thomas	dna_new_BC_2011-12-13.csv
Pv12.051	Fraser	49.1204	-123.2104	9	6	2012	Harbour seal	CLUPAL	Clupea_pallasii	Pacific_Herring	257	NA	0.1797	17.97	UBC	Thomas	dna_new_BC_2011-12-13.csv
Pv12.051	Fraser	49.1204	-123.2104	9	6	2012	Harbour seal	LAMAYR	Lampetra_ayresii	River_Lamprey	527	NA	0.3685	36.85	UBC	Thomas	dna_new_BC_2011-12-13.csv
Pv12.051	Fraser	49.1204	-123.2104	9	6	2012	Harbour seal	ONCMYK	Oncorhynchus_mykiss	Steelhead	NA	7677	0.4462	44.62	UBC	Thomas	dna_new_BC_2011-12-13.csv
Pv12.051	Fraser	49.1204	-123.2104	9	6	2012	Harbour seal	ONCTSH	Oncorhynchus_tshawytscha	Chinook_Salmon	NA	95	0.0055	0.55	UBC	Thomas	dna_new_BC_2011-12-13.csv
Pv12.052	Fraser	49.1204	-123.2104	9	6	2012	Harbour seal	ALOSAP	Alosa_sapidissima	American_Shad	13	NA	0.2281	22.81	UBC	Thomas	dna_new_BC_2011-12-13.csv
Pv12.052	Fraser	49.1204	-123.2104	9	6	2012	Harbour seal	CLUPAL	Clupea_pallasii	Pacific_Herring	14	NA	0.2456	24.56	UBC	Thomas	dna_new_BC_2011-12-13.csv
Pv12.052	Fraser	49.1204	-123.2104	9	6	2012	Harbour seal	GASACU	Gasterosteus_aculeatus	Threespine_Stickleback	1	NA	0.0175	1.75	UBC	Thomas	dna_new_BC_2011-12-13.csv
Pv12.052	Fraser	49.1204	-123.2104	9	6	2012	Harbour seal	HYDCOL	Hydrolagus_colliei	Spotted_Ratfish	4	NA	0.0702	7.02	UBC	Thomas	dna_new_BC_2011-12-13.csv
Pv12.052	Fraser	49.1204	-123.2104	9	6	2012	Harbour seal	LAMAYR	Lampetra_ayresii	River_Lamprey	1	NA	0.0175	1.75	UBC	Thomas	dna_new_BC_2011-12-13.csv
Pv12.052	Fraser	49.1204	-123.2104	9	6	2012	Harbour seal	LEUSCH	Leuroglossus_schmidti	Northern_Smoothtongue	3	NA	0.0526	5.26	UBC	Thomas	dna_new_BC_2011-12-13.csv
Pv12.052	Fraser	49.1204	-123.2104	9	6	2012	Harbour seal	ONCGOR	Oncorhynchus_gorbuscha	Pink_Salmon	2	2	0.0561	5.61	UBC	Thomas	dna_new_BC_2011-12-13.csv
Pv12.052	Fraser	49.1204	-123.2104	9	6	2012	Harbour seal	ONCKIS	Oncorhynchus_kisutch	Coho_Salmon	3	1	0.0281	2.81	UBC	Thomas	dna_new_BC_2011-12-13.csv
Pv12.052	Fraser	49.1204	-123.2104	9	6	2012	Harbour seal	ONCTSH	Oncorhynchus_tshawytscha	Chinook_Salmon	2	2	0.0561	5.61	UBC	Thomas	dna_new_BC_2011-12-13.csv
Pv12.052	Fraser	49.1204	-123.2104	9	6	2012	Harbour seal	RAJBIN	Raja_binoculata	Big_Skate	5	NA	0.0877	8.77	UBC	Thomas	dna_new_BC_2011-12-13.csv
Pv12.052	Fraser	49.1204	-123.2104	9	6	2012	Harbour seal	GADCHA	Gadus_chalcogrammus	Walleye_Pollock	8	NA	0.1404	14.04	UBC	Thomas	dna_new_BC_2011-12-13.csv
Pv12.053	Fraser	49.1204	-123.2104	9	6	2012	Harbour seal	CLUPAL	Clupea_pallasii	Pacific_Herring	318	NA	0.1469	14.69	UBC	Thomas	dna_new_BC_2011-12-13.csv
Pv12.053	Fraser	49.1204	-123.2104	9	6	2012	Harbour seal	LAMAYR	Lampetra_ayresii	River_Lamprey	603	NA	0.2785	27.85	UBC	Thomas	dna_new_BC_2011-12-13.csv
Pv12.053	Fraser	49.1204	-123.2104	9	6	2012	Harbour seal	ONCMYK	Oncorhynchus_mykiss	Steelhead	NA	9473	0.5746	57.46	UBC	Thomas	dna_new_BC_2011-12-13.csv
Pv12.054	Fraser	49.1204	-123.2104	9	6	2012	Harbour seal	ALOSAP	Alosa_sapidissima	American_Shad	4	NA	0.0667	6.67	UBC	Thomas	dna_new_BC_2011-12-13.csv
Pv12.054	Fraser	49.1204	-123.2104	9	6	2012	Harbour seal	AMMHEX	Ammodytes_hexapterus	Pacific_Sand_Lance	1	NA	0.0167	1.67	UBC	Thomas	dna_new_BC_2011-12-13.csv
Pv12.054	Fraser	49.1204	-123.2104	9	6	2012	Harbour seal	BATINT	Bathyraja_interrupta	Sandpaper_Skate	1	NA	0.0167	1.67	UBC	Thomas	dna_new_BC_2011-12-13.csv
Pv12.054	Fraser	49.1204	-123.2104	9	6	2012	Harbour seal	CLUPAL	Clupea_pallasii	Pacific_Herring	22	NA	0.3667	36.67	UBC	Thomas	dna_new_BC_2011-12-13.csv
Pv12.054	Fraser	49.1204	-123.2104	9	6	2012	Harbour seal	GASACU	Gasterosteus_aculeatus	Threespine_Stickleback	3	NA	0.0500	5.00	UBC	Thomas	dna_new_BC_2011-12-13.csv
Pv12.054	Fraser	49.1204	-123.2104	9	6	2012	Harbour seal	LAMAYR	Lampetra_ayresii	River_Lamprey	1	NA	0.0167	1.67	UBC	Thomas	dna_new_BC_2011-12-13.csv
Pv12.054	Fraser	49.1204	-123.2104	9	6	2012	Harbour seal	LUMSAG	Lumpenus_sagitta	Snake_Prickleback	1	NA	0.0167	1.67	UBC	Thomas	dna_new_BC_2011-12-13.csv
Pv12.054	Fraser	49.1204	-123.2104	9	6	2012	Harbour seal	MERPRO	Merluccius_productus	Pacific_Hake	1	NA	0.0167	1.67	UBC	Thomas	dna_new_BC_2011-12-13.csv
Pv12.054	Fraser	49.1204	-123.2104	9	6	2012	Harbour seal	MICPRO	Microgadus_proximus	Pacific_Tomcod	1	NA	0.0167	1.67	UBC	Thomas	dna_new_BC_2011-12-13.csv
Pv12.054	Fraser	49.1204	-123.2104	9	6	2012	Harbour seal	ONCGOR	Oncorhynchus_gorbuscha	Pink_Salmon	1	1	0.0278	2.78	UBC	Thomas	dna_new_BC_2011-12-13.csv
Pv12.054	Fraser	49.1204	-123.2104	9	6	2012	Harbour seal	ONCKET	Oncorhynchus_keta	Chum_Salmon	3	2	0.0556	5.56	UBC	Thomas	dna_new_BC_2011-12-13.csv
Pv12.054	Fraser	49.1204	-123.2104	9	6	2012	Harbour seal	ONCKIS	Oncorhynchus_kisutch	Coho_Salmon	4	1	0.0278	2.78	UBC	Thomas	dna_new_BC_2011-12-13.csv
Pv12.054	Fraser	49.1204	-123.2104	9	6	2012	Harbour seal	ONCTSH	Oncorhynchus_tshawytscha	Chinook_Salmon	2	2	0.0556	5.56	UBC	Thomas	dna_new_BC_2011-12-13.csv
Pv12.054	Fraser	49.1204	-123.2104	9	6	2012	Harbour seal	NA	Lepidopsetta_bilineata_OR_ Platichthys_stellatus	Rock_Sole_OR_Starry_Flounder	1	NA	0.0167	1.67	UBC	Thomas	dna_new_BC_2011-12-13.csv
Pv12.054	Fraser	49.1204	-123.2104	9	6	2012	Harbour seal	RAJBIN	Raja_binoculata	Big_Skate	1	NA	0.0167	1.67	UBC	Thomas	dna_new_BC_2011-12-13.csv
Pv12.054	Fraser	49.1204	-123.2104	9	6	2012	Harbour seal	GADCHA	Gadus_chalcogrammus	Walleye_Pollock	13	NA	0.2167	21.67	UBC	Thomas	dna_new_BC_2011-12-13.csv
Pv12.055	Fraser	49.1204	-123.2104	9	6	2012	Harbour seal	ALOSAP	Alosa_sapidissima	American_Shad	1	NA	0.0400	4.00	UBC	Thomas	dna_new_BC_2011-12-13.csv
Pv12.055	Fraser	49.1204	-123.2104	9	6	2012	Harbour seal	CLUPAL	Clupea_pallasii	Pacific_Herring	3	NA	0.1200	12.00	UBC	Thomas	dna_new_BC_2011-12-13.csv
Pv12.055	Fraser	49.1204	-123.2104	9	6	2012	Harbour seal	LAMAYR	Lampetra_ayresii	River_Lamprey	4	NA	0.1600	16.00	UBC	Thomas	dna_new_BC_2011-12-13.csv
Pv12.055	Fraser	49.1204	-123.2104	9	6	2012	Harbour seal	MERPRO	Merluccius_productus	Pacific_Hake	1	NA	0.0400	4.00	UBC	Thomas	dna_new_BC_2011-12-13.csv
Pv12.055	Fraser	49.1204	-123.2104	9	6	2012	Harbour seal	ONCNER	Oncorhynchus_nerka	Sockeye_Salmon	NA	1	0.0244	2.44	UBC	Thomas	dna_new_BC_2011-12-13.csv
Pv12.055	Fraser	49.1204	-123.2104	9	6	2012	Harbour seal	ONCTSH	Oncorhynchus_tshawytscha	Chinook_Salmon	11	17	0.4156	41.56	UBC	Thomas	dna_new_BC_2011-12-13.csv
Pv12.055	Fraser	49.1204	-123.2104	9	6	2012	Harbour seal	GADCHA	Gadus_chalcogrammus	Walleye_Pollock	5	NA	0.2000	20.00	UBC	Thomas	dna_new_BC_2011-12-13.csv
Pv12.056	Fraser	49.1204	-123.2104	9	6	2012	Harbour seal	ALOSAP	Alosa_sapidissima	American_Shad	2	NA	0.0156	1.56	UBC	Thomas	dna_new_BC_2011-12-13.csv
Pv12.056	Fraser	49.1204	-123.2104	9	6	2012	Harbour seal	CLUPAL	Clupea_pallasii	Pacific_Herring	15	NA	0.1172	11.72	UBC	Thomas	dna_new_BC_2011-12-13.csv
Pv12.056	Fraser	49.1204	-123.2104	9	6	2012	Harbour seal	GASACU	Gasterosteus_aculeatus	Threespine_Stickleback	33	NA	0.2578	25.78	UBC	Thomas	dna_new_BC_2011-12-13.csv
Pv12.056	Fraser	49.1204	-123.2104	9	6	2012	Harbour seal	HYDCOL	Hydrolagus_colliei	Spotted_Ratfish	2	NA	0.0156	1.56	UBC	Thomas	dna_new_BC_2011-12-13.csv
Pv12.056	Fraser	49.1204	-123.2104	9	6	2012	Harbour seal	LEUSCH	Leuroglossus_schmidti	Northern_Smoothtongue	2	NA	0.0156	1.56	UBC	Thomas	dna_new_BC_2011-12-13.csv
Pv12.056	Fraser	49.1204	-123.2104	9	6	2012	Harbour seal	LOLOPA	Loligo_opalescens	California_Market_Squid	19	NA	0.1484	14.84	UBC	Thomas	dna_new_BC_2011-12-13.csv
Pv12.056	Fraser	49.1204	-123.2104	9	6	2012	Harbour seal	MERPRO	Merluccius_productus	Pacific_Hake	2	NA	0.0156	1.56	UBC	Thomas	dna_new_BC_2011-12-13.csv
Pv12.056	Fraser	49.1204	-123.2104	9	6	2012	Harbour seal	ONCGOR	Oncorhynchus_gorbuscha	Pink_Salmon	2	7	0.0038	0.38	UBC	Thomas	dna_new_BC_2011-12-13.csv
Pv12.056	Fraser	49.1204	-123.2104	9	6	2012	Harbour seal	ONCKET	Oncorhynchus_keta	Chum_Salmon	NA	7	0.0038	0.38	UBC	Thomas	dna_new_BC_2011-12-13.csv
Pv12.056	Fraser	49.1204	-123.2104	9	6	2012	Harbour seal	ONCKIS	Oncorhynchus_kisutch	Coho_Salmon	NA	17	0.0093	0.93	UBC	Thomas	dna_new_BC_2011-12-13.csv
Pv12.056	Fraser	49.1204	-123.2104	9	6	2012	Harbour seal	ONCMYK	Oncorhynchus_mykiss	Steelhead	NA	3	0.0016	0.16	UBC	Thomas	dna_new_BC_2011-12-13.csv
Pv12.056	Fraser	49.1204	-123.2104	9	6	2012	Harbour seal	ONCNER	Oncorhynchus_nerka	Sockeye_Salmon	NA	1	0.0005	0.05	UBC	Thomas	dna_new_BC_2011-12-13.csv
Pv12.056	Fraser	49.1204	-123.2104	9	6	2012	Harbour seal	ONCTSH	Oncorhynchus_tshawytscha	Chinook_Salmon	4	13	0.0071	0.71	UBC	Thomas	dna_new_BC_2011-12-13.csv
Pv12.056	Fraser	49.1204	-123.2104	9	6	2012	Harbour seal	SALSAL	Salmo_salar	Atlantic_Salmon	NA	38	0.0207	2.07	UBC	Thomas	dna_new_BC_2011-12-13.csv
Pv12.056	Fraser	49.1204	-123.2104	9	6	2012	Harbour seal	GADCHA	Gadus_chalcogrammus	Walleye_Pollock	47	NA	0.3672	36.72	UBC	Thomas	dna_new_BC_2011-12-13.csv
Pv12.057	Fraser	49.1204	-123.2104	9	6	2012	Harbour seal	CLUPAL	Clupea_pallasii	Pacific_Herring	29	NA	0.1543	15.43	UBC	Thomas	dna_new_BC_2011-12-13.csv
Pv12.057	Fraser	49.1204	-123.2104	9	6	2012	Harbour seal	HYDCOL	Hydrolagus_colliei	Spotted_Ratfish	2	NA	0.0106	1.06	UBC	Thomas	dna_new_BC_2011-12-13.csv
Pv12.057	Fraser	49.1204	-123.2104	9	6	2012	Harbour seal	MERPRO	Merluccius_productus	Pacific_Hake	4	NA	0.0213	2.13	UBC	Thomas	dna_new_BC_2011-12-13.csv
Pv12.057	Fraser	49.1204	-123.2104	9	6	2012	Harbour seal	ONCKIS	Oncorhynchus_kisutch	Coho_Salmon	4	NA	0.0213	2.13	UBC	Thomas	dna_new_BC_2011-12-13.csv
Pv12.057	Fraser	49.1204	-123.2104	9	6	2012	Harbour seal	RAJBIN	Raja_binoculata	Big_Skate	3	NA	0.0160	1.60	UBC	Thomas	dna_new_BC_2011-12-13.csv
Pv12.057	Fraser	49.1204	-123.2104	9	6	2012	Harbour seal	GADCHA	Gadus_chalcogrammus	Walleye_Pollock	146	NA	0.7766	77.66	UBC	Thomas	dna_new_BC_2011-12-13.csv
Pv12.058	Fraser	49.1204	-123.2104	9	6	2012	Harbour seal	CLUPAL	Clupea_pallasii	Pacific_Herring	236	NA	0.2348	23.48	UBC	Thomas	dna_new_BC_2011-12-13.csv
Pv12.058	Fraser	49.1204	-123.2104	9	6	2012	Harbour seal	ONCTSH	Oncorhynchus_tshawytscha	Chinook_Salmon	769	7131	0.7652	76.52	UBC	Thomas	dna_new_BC_2011-12-13.csv
Pv12.059	Fraser	49.1204	-123.2104	9	6	2012	Harbour seal	ALOSAP	Alosa_sapidissima	American_Shad	3	NA	0.0750	7.50	UBC	Thomas	dna_new_BC_2011-12-13.csv
Pv12.059	Fraser	49.1204	-123.2104	9	6	2012	Harbour seal	CLUPAL	Clupea_pallasii	Pacific_Herring	18	NA	0.4500	45.00	UBC	Thomas	dna_new_BC_2011-12-13.csv
Pv12.059	Fraser	49.1204	-123.2104	9	6	2012	Harbour seal	GASACU	Gasterosteus_aculeatus	Threespine_Stickleback	1	NA	0.0250	2.50	UBC	Thomas	dna_new_BC_2011-12-13.csv
Pv12.059	Fraser	49.1204	-123.2104	9	6	2012	Harbour seal	HYDCOL	Hydrolagus_colliei	Spotted_Ratfish	1	NA	0.0250	2.50	UBC	Thomas	dna_new_BC_2011-12-13.csv
Pv12.059	Fraser	49.1204	-123.2104	9	6	2012	Harbour seal	LUMSAG	Lumpenus_sagitta	Snake_Prickleback	1	NA	0.0250	2.50	UBC	Thomas	dna_new_BC_2011-12-13.csv
Pv12.059	Fraser	49.1204	-123.2104	9	6	2012	Harbour seal	MERPRO	Merluccius_productus	Pacific_Hake	1	NA	0.0250	2.50	UBC	Thomas	dna_new_BC_2011-12-13.csv
Pv12.059	Fraser	49.1204	-123.2104	9	6	2012	Harbour seal	ONCKET	Oncorhynchus_keta	Chum_Salmon	3	NA	0.0750	7.50	UBC	Thomas	dna_new_BC_2011-12-13.csv
Pv12.059	Fraser	49.1204	-123.2104	9	6	2012	Harbour seal	ONCKIS	Oncorhynchus_kisutch	Coho_Salmon	2	NA	0.0500	5.00	UBC	Thomas	dna_new_BC_2011-12-13.csv
Pv12.059	Fraser	49.1204	-123.2104	9	6	2012	Harbour seal	PORNOT	Porichthys_notatus	Plainfin_Midshipman	2	NA	0.0500	5.00	UBC	Thomas	dna_new_BC_2011-12-13.csv
Pv12.059	Fraser	49.1204	-123.2104	9	6	2012	Harbour seal	RAJBIN	Raja_binoculata	Big_Skate	1	NA	0.0250	2.50	UBC	Thomas	dna_new_BC_2011-12-13.csv
Pv12.059	Fraser	49.1204	-123.2104	9	6	2012	Harbour seal	GADCHA	Gadus_chalcogrammus	Walleye_Pollock	7	NA	0.1750	17.50	UBC	Thomas	dna_new_BC_2011-12-13.csv
Pv12.060	Fraser	49.1204	-123.2104	9	6	2012	Harbour seal	CLUPAL	Clupea_pallasii	Pacific_Herring	24	NA	0.0143	1.43	UBC	Thomas	dna_new_BC_2011-12-13.csv
Pv12.060	Fraser	49.1204	-123.2104	9	6	2012	Harbour seal	ONCGOR	Oncorhynchus_gorbuscha	Pink_Salmon	262	NA	0.1557	15.57	UBC	Thomas	dna_new_BC_2011-12-13.csv
Pv12.060	Fraser	49.1204	-123.2104	9	6	2012	Harbour seal	ONCKET	Oncorhynchus_keta	Chum_Salmon	43	NA	0.0255	2.55	UBC	Thomas	dna_new_BC_2011-12-13.csv
Pv12.060	Fraser	49.1204	-123.2104	9	6	2012	Harbour seal	ONCKIS	Oncorhynchus_kisutch	Coho_Salmon	691	NA	0.4106	41.06	UBC	Thomas	dna_new_BC_2011-12-13.csv
Pv12.060	Fraser	49.1204	-123.2104	9	6	2012	Harbour seal	ONCNER	Oncorhynchus_nerka	Sockeye_Salmon	130	NA	0.0772	7.72	UBC	Thomas	dna_new_BC_2011-12-13.csv
Pv12.060	Fraser	49.1204	-123.2104	9	6	2012	Harbour seal	ONCTSH	Oncorhynchus_tshawytscha	Chinook_Salmon	533	NA	0.3167	31.67	UBC	Thomas	dna_new_BC_2011-12-13.csv
Pv12.061	Fraser	49.1204	-123.2104	9	6	2012	Harbour seal	CLUPAL	Clupea_pallasii	Pacific_Herring	302	NA	0.7242	72.42	UBC	Thomas	dna_new_BC_2011-12-13.csv
Pv12.061	Fraser	49.1204	-123.2104	9	6	2012	Harbour seal	LEUSCH	Leuroglossus_schmidti	Northern_Smoothtongue	100	NA	0.2398	23.98	UBC	Thomas	dna_new_BC_2011-12-13.csv
Pv12.061	Fraser	49.1204	-123.2104	9	6	2012	Harbour seal	RAJBIN	Raja_binoculata	Big_Skate	6	NA	0.0144	1.44	UBC	Thomas	dna_new_BC_2011-12-13.csv
Pv12.061	Fraser	49.1204	-123.2104	9	6	2012	Harbour seal	GADCHA	Gadus_chalcogrammus	Walleye_Pollock	9	NA	0.0216	2.16	UBC	Thomas	dna_new_BC_2011-12-13.csv
Pv12.062	Fraser	49.1204	-123.2104	9	6	2012	Harbour seal	CLUPAL	Clupea_pallasii	Pacific_Herring	105	NA	0.7895	78.95	UBC	Thomas	dna_new_BC_2011-12-13.csv
Pv12.062	Fraser	49.1204	-123.2104	9	6	2012	Harbour seal	HYDCOL	Hydrolagus_colliei	Spotted_Ratfish	3	NA	0.0226	2.26	UBC	Thomas	dna_new_BC_2011-12-13.csv
Pv12.062	Fraser	49.1204	-123.2104	9	6	2012	Harbour seal	LEUSCH	Leuroglossus_schmidti	Northern_Smoothtongue	5	NA	0.0376	3.76	UBC	Thomas	dna_new_BC_2011-12-13.csv
Pv12.062	Fraser	49.1204	-123.2104	9	6	2012	Harbour seal	MERPRO	Merluccius_productus	Pacific_Hake	3	NA	0.0226	2.26	UBC	Thomas	dna_new_BC_2011-12-13.csv
Pv12.062	Fraser	49.1204	-123.2104	9	6	2012	Harbour seal	ONCKIS	Oncorhynchus_kisutch	Coho_Salmon	3	NA	0.0226	2.26	UBC	Thomas	dna_new_BC_2011-12-13.csv
Pv12.062	Fraser	49.1204	-123.2104	9	6	2012	Harbour seal	RAJBIN	Raja_binoculata	Big_Skate	5	NA	0.0376	3.76	UBC	Thomas	dna_new_BC_2011-12-13.csv
Pv12.062	Fraser	49.1204	-123.2104	9	6	2012	Harbour seal	GADCHA	Gadus_chalcogrammus	Walleye_Pollock	9	NA	0.0677	6.77	UBC	Thomas	dna_new_BC_2011-12-13.csv
Pv12.063	Fraser	49.1204	-123.2104	9	6	2012	Harbour seal	ALOSAP	Alosa_sapidissima	American_Shad	1	NA	0.0106	1.06	UBC	Thomas	dna_new_BC_2011-12-13.csv
Pv12.063	Fraser	49.1204	-123.2104	9	6	2012	Harbour seal	CLUPAL	Clupea_pallasii	Pacific_Herring	57	NA	0.6064	60.64	UBC	Thomas	dna_new_BC_2011-12-13.csv
Pv12.063	Fraser	49.1204	-123.2104	9	6	2012	Harbour seal	GASACU	Gasterosteus_aculeatus	Threespine_Stickleback	1	NA	0.0106	1.06	UBC	Thomas	dna_new_BC_2011-12-13.csv
Pv12.063	Fraser	49.1204	-123.2104	9	6	2012	Harbour seal	HYDCOL	Hydrolagus_colliei	Spotted_Ratfish	3	NA	0.0319	3.19	UBC	Thomas	dna_new_BC_2011-12-13.csv
Pv12.063	Fraser	49.1204	-123.2104	9	6	2012	Harbour seal	LEUSCH	Leuroglossus_schmidti	Northern_Smoothtongue	1	NA	0.0106	1.06	UBC	Thomas	dna_new_BC_2011-12-13.csv
Pv12.063	Fraser	49.1204	-123.2104	9	6	2012	Harbour seal	MERPRO	Merluccius_productus	Pacific_Hake	5	NA	0.0532	5.32	UBC	Thomas	dna_new_BC_2011-12-13.csv
Pv12.063	Fraser	49.1204	-123.2104	9	6	2012	Harbour seal	MICPRO	Microgadus_proximus	Pacific_Tomcod	1	NA	0.0106	1.06	UBC	Thomas	dna_new_BC_2011-12-13.csv
Pv12.063	Fraser	49.1204	-123.2104	9	6	2012	Harbour seal	ONCKIS	Oncorhynchus_kisutch	Coho_Salmon	2	1	0.0124	1.24	UBC	Thomas	dna_new_BC_2011-12-13.csv
Pv12.063	Fraser	49.1204	-123.2104	9	6	2012	Harbour seal	ONCMYK	Oncorhynchus_mykiss	Steelhead	NA	1	0.0124	1.24	UBC	Thomas	dna_new_BC_2011-12-13.csv
Pv12.063	Fraser	49.1204	-123.2104	9	6	2012	Harbour seal	ONCTSH	Oncorhynchus_tshawytscha	Chinook_Salmon	5	4	0.0496	4.96	UBC	Thomas	dna_new_BC_2011-12-13.csv
Pv12.063	Fraser	49.1204	-123.2104	9	6	2012	Harbour seal	NA	Lepidopsetta_bilineata_OR_ Platichthys_stellatus	Rock_Sole_OR_Starry_Flounder	1	NA	0.0106	1.06	UBC	Thomas	dna_new_BC_2011-12-13.csv
Pv12.063	Fraser	49.1204	-123.2104	9	6	2012	Harbour seal	RAJBIN	Raja_binoculata	Big_Skate	1	NA	0.0106	1.06	UBC	Thomas	dna_new_BC_2011-12-13.csv
Pv12.063	Fraser	49.1204	-123.2104	9	6	2012	Harbour seal	GADCHA	Gadus_chalcogrammus	Walleye_Pollock	16	NA	0.1702	17.02	UBC	Thomas	dna_new_BC_2011-12-13.csv
Pv12.064	Fraser	49.1204	-123.2104	9	6	2012	Harbour seal	ALOSAP	Alosa_sapidissima	American_Shad	3	NA	0.0750	7.50	UBC	Thomas	dna_new_BC_2011-12-13.csv
Pv12.064	Fraser	49.1204	-123.2104	9	6	2012	Harbour seal	ANAOCE	Anarrhichthys_ocellatus	Wolf_Eel	1	NA	0.0250	2.50	UBC	Thomas	dna_new_BC_2011-12-13.csv
Pv12.064	Fraser	49.1204	-123.2104	9	6	2012	Harbour seal	CLUPAL	Clupea_pallasii	Pacific_Herring	18	NA	0.4500	45.00	UBC	Thomas	dna_new_BC_2011-12-13.csv
Pv12.064	Fraser	49.1204	-123.2104	9	6	2012	Harbour seal	MERPRO	Merluccius_productus	Pacific_Hake	1	NA	0.0250	2.50	UBC	Thomas	dna_new_BC_2011-12-13.csv
Pv12.064	Fraser	49.1204	-123.2104	9	6	2012	Harbour seal	MICPAC	Microstomus_pacificus	Dover_Sole	1	NA	0.0250	2.50	UBC	Thomas	dna_new_BC_2011-12-13.csv
Pv12.064	Fraser	49.1204	-123.2104	9	6	2012	Harbour seal	ONCNER	Oncorhynchus_nerka	Sockeye_Salmon	NA	1	0.0250	2.50	UBC	Thomas	dna_new_BC_2011-12-13.csv
Pv12.064	Fraser	49.1204	-123.2104	9	6	2012	Harbour seal	ONCTSH	Oncorhynchus_tshawytscha	Chinook_Salmon	6	7	0.1750	17.50	UBC	Thomas	dna_new_BC_2011-12-13.csv
Pv12.064	Fraser	49.1204	-123.2104	9	6	2012	Harbour seal	NA	Lepidopsetta_bilineata_OR_ Platichthys_stellatus	Rock_Sole_OR_Starry_Flounder	1	NA	0.0250	2.50	UBC	Thomas	dna_new_BC_2011-12-13.csv
Pv12.064	Fraser	49.1204	-123.2104	9	6	2012	Harbour seal	RAJBIN	Raja_binoculata	Big_Skate	2	NA	0.0500	5.00	UBC	Thomas	dna_new_BC_2011-12-13.csv
Pv12.064	Fraser	49.1204	-123.2104	9	6	2012	Harbour seal	GADCHA	Gadus_chalcogrammus	Walleye_Pollock	5	NA	0.1250	12.50	UBC	Thomas	dna_new_BC_2011-12-13.csv
Pv12.065	Belle Chain	48.8323	-123.1984	10	6	2012	Harbour seal	GADCHA	Gadus_chalcogrammus	Walleye_Pollock	4940	NA	1.0000	100.00	UBC	Thomas	dna_new_BC_2011-12-13.csv
Pv12.066	Belle Chain	48.8323	-123.1984	10	6	2012	Harbour seal	CLUPAL	Clupea_pallasii	Pacific_Herring	2445	NA	1.0000	100.00	UBC	Thomas	dna_new_BC_2011-12-13.csv
Pv12.067	Belle Chain	48.8323	-123.1984	10	6	2012	Harbour seal	AMMHEX	Ammodytes_hexapterus	Pacific_Sand_Lance	1	NA	0.0400	4.00	UBC	Thomas	dna_new_BC_2011-12-13.csv
Pv12.067	Belle Chain	48.8323	-123.1984	10	6	2012	Harbour seal	RAJBIN	Raja_binoculata	Big_Skate	1	NA	0.0400	4.00	UBC	Thomas	dna_new_BC_2011-12-13.csv
Pv12.067	Belle Chain	48.8323	-123.1984	10	6	2012	Harbour seal	ONCKET	Oncorhynchus_keta	Chum_Salmon	NA	1	0.0160	1.60	UBC	Thomas	dna_new_BC_2011-12-13.csv
Pv12.067	Belle Chain	48.8323	-123.1984	10	6	2012	Harbour seal	GADCHA	Gadus_chalcogrammus	Walleye_Pollock	9	NA	0.3600	36.00	UBC	Thomas	dna_new_BC_2011-12-13.csv
Pv12.067	Belle Chain	48.8323	-123.1984	10	6	2012	Harbour seal	CLUPAL	Clupea_pallasii	Pacific_Herring	6	NA	0.2400	24.00	UBC	Thomas	dna_new_BC_2011-12-13.csv
Pv12.067	Belle Chain	48.8323	-123.1984	10	6	2012	Harbour seal	ONCKIS	Oncorhynchus_kisutch	Coho_Salmon	3	4	0.0640	6.40	UBC	Thomas	dna_new_BC_2011-12-13.csv
Pv12.067	Belle Chain	48.8323	-123.1984	10	6	2012	Harbour seal	ONCMYK	Oncorhynchus_mykiss	Steelhead	NA	1	0.0160	1.60	UBC	Thomas	dna_new_BC_2011-12-13.csv
Pv12.067	Belle Chain	48.8323	-123.1984	10	6	2012	Harbour seal	ONCTSH	Oncorhynchus_tshawytscha	Chinook_Salmon	1	1	0.0160	1.60	UBC	Thomas	dna_new_BC_2011-12-13.csv
Pv12.067	Belle Chain	48.8323	-123.1984	10	6	2012	Harbour seal	GADMAC	Gadus_macrocephalus	Pacific_Cod	3	NA	0.1200	12.00	UBC	Thomas	dna_new_BC_2011-12-13.csv
Pv12.067	Belle Chain	48.8323	-123.1984	10	6	2012	Harbour seal	LYCPAC	Lycodes_pacificus	Blackbelly_Eelpout	1	NA	0.0400	4.00	UBC	Thomas	dna_new_BC_2011-12-13.csv
Pv12.067	Belle Chain	48.8323	-123.1984	10	6	2012	Harbour seal	ONCGOR	Oncorhynchus_gorbuscha	Pink_Salmon	NA	3	0.0480	4.80	UBC	Thomas	dna_new_BC_2011-12-13.csv
Pv12.068	Belle Chain	48.8323	-123.1984	10	6	2012	Harbour seal	HYDCOL	Hydrolagus_colliei	Spotted_Ratfish	1002	NA	0.2773	27.73	UBC	Thomas	dna_new_BC_2011-12-13.csv
Pv12.068	Belle Chain	48.8323	-123.1984	10	6	2012	Harbour seal	GADCHA	Gadus_chalcogrammus	Walleye_Pollock	2612	NA	0.7227	72.27	UBC	Thomas	dna_new_BC_2011-12-13.csv
Pv12.069	Belle Chain	48.8323	-123.1984	10	6	2012	Harbour seal	ANAOCE	Anarrhichthys_ocellatus	Wolf_Eel	35	NA	0.0110	1.10	UBC	Thomas	dna_new_BC_2011-12-13.csv
Pv12.069	Belle Chain	48.8323	-123.1984	10	6	2012	Harbour seal	CLUPAL	Clupea_pallasii	Pacific_Herring	2183	NA	0.6878	68.78	UBC	Thomas	dna_new_BC_2011-12-13.csv
Pv12.069	Belle Chain	48.8323	-123.1984	10	6	2012	Harbour seal	LAMAYR	Lampetra_ayresii	River_Lamprey	204	NA	0.0643	6.43	UBC	Thomas	dna_new_BC_2011-12-13.csv
Pv12.069	Belle Chain	48.8323	-123.1984	10	6	2012	Harbour seal	GADCHA	Gadus_chalcogrammus	Walleye_Pollock	752	NA	0.2369	23.69	UBC	Thomas	dna_new_BC_2011-12-13.csv
Pv12.070	Belle Chain	48.8323	-123.1984	10	6	2012	Harbour seal	CLUPAL	Clupea_pallasii	Pacific_Herring	1163	NA	1.0000	100.00	UBC	Thomas	dna_new_BC_2011-12-13.csv
Pv12.071	Belle Chain	48.8323	-123.1984	10	6	2012	Harbour seal	CLUPAL	Clupea_pallasii	Pacific_Herring	22	NA	0.0326	3.26	UBC	Thomas	dna_new_BC_2011-12-13.csv
Pv12.071	Belle Chain	48.8323	-123.1984	10	6	2012	Harbour seal	GADCHA	Gadus_chalcogrammus	Walleye_Pollock	653	NA	0.9674	96.74	UBC	Thomas	dna_new_BC_2011-12-13.csv
Pv12.072	Belle Chain	48.8323	-123.1984	10	6	2012	Harbour seal	ALOSAP	Alosa_sapidissima	American_Shad	2	NA	0.0714	7.14	UBC	Thomas	dna_new_BC_2011-12-13.csv
Pv12.072	Belle Chain	48.8323	-123.1984	10	6	2012	Harbour seal	CLUPAL	Clupea_pallasii	Pacific_Herring	10	NA	0.3571	35.71	UBC	Thomas	dna_new_BC_2011-12-13.csv
Pv12.072	Belle Chain	48.8323	-123.1984	10	6	2012	Harbour seal	GASACU	Gasterosteus_aculeatus	Threespine_Stickleback	1	NA	0.0357	3.57	UBC	Thomas	dna_new_BC_2011-12-13.csv
Pv12.072	Belle Chain	48.8323	-123.1984	10	6	2012	Harbour seal	RAJBIN	Raja_binoculata	Big_Skate	3	NA	0.1071	10.71	UBC	Thomas	dna_new_BC_2011-12-13.csv
Pv12.072	Belle Chain	48.8323	-123.1984	10	6	2012	Harbour seal	GADCHA	Gadus_chalcogrammus	Walleye_Pollock	2	NA	0.0714	7.14	UBC	Thomas	dna_new_BC_2011-12-13.csv
Pv12.072	Belle Chain	48.8323	-123.1984	10	6	2012	Harbour seal	MERPRO	Merluccius_productus	Pacific_Hake	1	NA	0.0357	3.57	UBC	Thomas	dna_new_BC_2011-12-13.csv
Pv12.072	Belle Chain	48.8323	-123.1984	10	6	2012	Harbour seal	ONCGOR	Oncorhynchus_gorbuscha	Pink_Salmon	1	1365	0.3214	32.14	UBC	Thomas	dna_new_BC_2011-12-13.csv
Pv12.073	Comox	49.6016	-124.8904	12	6	2012	Harbour seal	ONCTSH	Oncorhynchus_tshawytscha	Chinook_Salmon	1	NA	0.0108	1.08	UBC	Thomas	dna_new_BC_2011-12-13.csv
Pv12.073	Comox	49.6016	-124.8904	12	6	2012	Harbour seal	RAJBIN	Raja_binoculata	Big_Skate	2	NA	0.0215	2.15	UBC	Thomas	dna_new_BC_2011-12-13.csv
Pv12.073	Comox	49.6016	-124.8904	12	6	2012	Harbour seal	THAPAC	Thaleichthys_pacificus	Eulachon	1	NA	0.0108	1.08	UBC	Thomas	dna_new_BC_2011-12-13.csv
Pv12.073	Comox	49.6016	-124.8904	12	6	2012	Harbour seal	MICPRO	Microgadus_proximus	Pacific_Tomcod	1	NA	0.0108	1.08	UBC	Thomas	dna_new_BC_2011-12-13.csv
Pv12.073	Comox	49.6016	-124.8904	12	6	2012	Harbour seal	ONCKIS	Oncorhynchus_kisutch	Coho_Salmon	1	NA	0.0108	1.08	UBC	Thomas	dna_new_BC_2011-12-13.csv
Pv12.073	Comox	49.6016	-124.8904	12	6	2012	Harbour seal	LUMSAG	Lumpenus_sagitta	Snake_Prickleback	1	NA	0.0108	1.08	UBC	Thomas	dna_new_BC_2011-12-13.csv
Pv12.073	Comox	49.6016	-124.8904	12	6	2012	Harbour seal	MERPRO	Merluccius_productus	Pacific_Hake	2	NA	0.0215	2.15	UBC	Thomas	dna_new_BC_2011-12-13.csv
Pv12.073	Comox	49.6016	-124.8904	12	6	2012	Harbour seal	MICPAC	Microstomus_pacificus	Dover_Sole	1	NA	0.0108	1.08	UBC	Thomas	dna_new_BC_2011-12-13.csv
Pv12.073	Comox	49.6016	-124.8904	12	6	2012	Harbour seal	AMMHEX	Ammodytes_hexapterus	Pacific_Sand_Lance	54	NA	0.5806	58.06	UBC	Thomas	dna_new_BC_2011-12-13.csv
Pv12.073	Comox	49.6016	-124.8904	12	6	2012	Harbour seal	BATINT	Bathyraja_interrupta	Sandpaper_Skate	1	NA	0.0108	1.08	UBC	Thomas	dna_new_BC_2011-12-13.csv
Pv12.073	Comox	49.6016	-124.8904	12	6	2012	Harbour seal	CLUPAL	Clupea_pallasii	Pacific_Herring	9	NA	0.0968	9.68	UBC	Thomas	dna_new_BC_2011-12-13.csv
Pv12.073	Comox	49.6016	-124.8904	12	6	2012	Harbour seal	CYMAGG	Cymatogaster_aggregata	Shiner_Surfperch	2	NA	0.0215	2.15	UBC	Thomas	dna_new_BC_2011-12-13.csv
Pv12.073	Comox	49.6016	-124.8904	12	6	2012	Harbour seal	LEPARM	Leptocottus_armatus	Pacific_Staghorn_Sculpin	1	NA	0.0108	1.08	UBC	Thomas	dna_new_BC_2011-12-13.csv
Pv12.073	Comox	49.6016	-124.8904	12	6	2012	Harbour seal	ALOSAP	Alosa_sapidissima	American_Shad	1	NA	0.0108	1.08	UBC	Thomas	dna_new_BC_2011-12-13.csv
Pv12.073	Comox	49.6016	-124.8904	12	6	2012	Harbour seal	GASACU	Gasterosteus_aculeatus	Threespine_Stickleback	14	NA	0.1505	15.05	UBC	Thomas	dna_new_BC_2011-12-13.csv
Pv12.073	Comox	49.6016	-124.8904	12	6	2012	Harbour seal	LAMAYR	Lampetra_ayresii	River_Lamprey	1	NA	0.0108	1.08	UBC	Thomas	dna_new_BC_2011-12-13.csv
Pv12.074	Comox	49.6016	-124.8904	12	6	2012	Harbour seal	GADCHA	Gadus_chalcogrammus	Walleye_Pollock	91	NA	0.1028	10.28	UBC	Thomas	dna_new_BC_2011-12-13.csv
Pv12.074	Comox	49.6016	-124.8904	12	6	2012	Harbour seal	ONCMYK	Oncorhynchus_mykiss	Steelhead	NA	12	0.0052	0.52	UBC	Thomas	dna_new_BC_2011-12-13.csv
Pv12.074	Comox	49.6016	-124.8904	12	6	2012	Harbour seal	ONCTSH	Oncorhynchus_tshawytscha	Chinook_Salmon	NA	22	0.0095	0.95	UBC	Thomas	dna_new_BC_2011-12-13.csv
Pv12.074	Comox	49.6016	-124.8904	12	6	2012	Harbour seal	CLUPAL	Clupea_pallasii	Pacific_Herring	251	NA	0.2836	28.36	UBC	Thomas	dna_new_BC_2011-12-13.csv
Pv12.074	Comox	49.6016	-124.8904	12	6	2012	Harbour seal	ONCKIS	Oncorhynchus_kisutch	Coho_Salmon	NA	11	0.0047	0.47	UBC	Thomas	dna_new_BC_2011-12-13.csv
Pv12.074	Comox	49.6016	-124.8904	12	6	2012	Harbour seal	AMMHEX	Ammodytes_hexapterus	Pacific_Sand_Lance	522	NA	0.5898	58.98	UBC	Thomas	dna_new_BC_2011-12-13.csv
Pv12.074	Comox	49.6016	-124.8904	12	6	2012	Harbour seal	ONCGOR	Oncorhynchus_gorbuscha	Pink_Salmon	NA	4	0.0017	0.17	UBC	Thomas	dna_new_BC_2011-12-13.csv
Pv12.074	Comox	49.6016	-124.8904	12	6	2012	Harbour seal	ONCKET	Oncorhynchus_keta	Chum_Salmon	21	6	0.0026	0.26	UBC	Thomas	dna_new_BC_2011-12-13.csv
Pv12.075	Comox	49.6016	-124.8904	12	6	2012	Harbour seal	CLUPAL	Clupea_pallasii	Pacific_Herring	157	NA	0.6515	65.15	UBC	Thomas	dna_new_BC_2011-12-13.csv
Pv12.075	Comox	49.6016	-124.8904	12	6	2012	Harbour seal	MICPRO	Microgadus_proximus	Pacific_Tomcod	56	NA	0.2324	23.24	UBC	Thomas	dna_new_BC_2011-12-13.csv
Pv12.075	Comox	49.6016	-124.8904	12	6	2012	Harbour seal	ONCGOR	Oncorhynchus_gorbuscha	Pink_Salmon	NA	4	0.0008	0.08	UBC	Thomas	dna_new_BC_2011-12-13.csv
Pv12.075	Comox	49.6016	-124.8904	12	6	2012	Harbour seal	ONCKET	Oncorhynchus_keta	Chum_Salmon	NA	5	0.0010	0.10	UBC	Thomas	dna_new_BC_2011-12-13.csv
Pv12.075	Comox	49.6016	-124.8904	12	6	2012	Harbour seal	ONCKIS	Oncorhynchus_kisutch	Coho_Salmon	NA	14	0.0027	0.27	UBC	Thomas	dna_new_BC_2011-12-13.csv
Pv12.075	Comox	49.6016	-124.8904	12	6	2012	Harbour seal	ONCMYK	Oncorhynchus_mykiss	Steelhead	NA	19	0.0037	0.37	UBC	Thomas	dna_new_BC_2011-12-13.csv
Pv12.075	Comox	49.6016	-124.8904	12	6	2012	Harbour seal	ONCTSH	Oncorhynchus_tshawytscha	Chinook_Salmon	3	22	0.0043	0.43	UBC	Thomas	dna_new_BC_2011-12-13.csv
Pv12.075	Comox	49.6016	-124.8904	12	6	2012	Harbour seal	RAJBIN	Raja_binoculata	Big_Skate	3	NA	0.0124	1.24	UBC	Thomas	dna_new_BC_2011-12-13.csv
Pv12.075	Comox	49.6016	-124.8904	12	6	2012	Harbour seal	GADCHA	Gadus_chalcogrammus	Walleye_Pollock	22	NA	0.0913	9.13	UBC	Thomas	dna_new_BC_2011-12-13.csv
Pv12.076	Comox	49.6016	-124.8904	12	6	2012	Harbour seal	CLUPAL	Clupea_pallasii	Pacific_Herring	903	NA	1.0000	100.00	UBC	Thomas	dna_new_BC_2011-12-13.csv
Pv12.077	Comox	49.6016	-124.8904	12	6	2012	Harbour seal	MERPRO	Merluccius_productus	Pacific_Hake	2453	NA	1.0000	100.00	UBC	Thomas	dna_new_BC_2011-12-13.csv
Pv12.078	Comox	49.6016	-124.8904	12	6	2012	Harbour seal	ALOSAP	Alosa_sapidissima	American_Shad	5	NA	0.0156	1.56	UBC	Thomas	dna_new_BC_2011-12-13.csv
Pv12.078	Comox	49.6016	-124.8904	12	6	2012	Harbour seal	CLUPAL	Clupea_pallasii	Pacific_Herring	49	NA	0.1531	15.31	UBC	Thomas	dna_new_BC_2011-12-13.csv
Pv12.078	Comox	49.6016	-124.8904	12	6	2012	Harbour seal	LEUSCH	Leuroglossus_schmidti	Northern_Smoothtongue	4	NA	0.0125	1.25	UBC	Thomas	dna_new_BC_2011-12-13.csv
Pv12.078	Comox	49.6016	-124.8904	12	6	2012	Harbour seal	LUMSAG	Lumpenus_sagitta	Snake_Prickleback	241	NA	0.7531	75.31	UBC	Thomas	dna_new_BC_2011-12-13.csv
Pv12.078	Comox	49.6016	-124.8904	12	6	2012	Harbour seal	MERPRO	Merluccius_productus	Pacific_Hake	4	NA	0.0125	1.25	UBC	Thomas	dna_new_BC_2011-12-13.csv
Pv12.078	Comox	49.6016	-124.8904	12	6	2012	Harbour seal	RAJBIN	Raja_binoculata	Big_Skate	6	NA	0.0188	1.88	UBC	Thomas	dna_new_BC_2011-12-13.csv
Pv12.078	Comox	49.6016	-124.8904	12	6	2012	Harbour seal	GADCHA	Gadus_chalcogrammus	Walleye_Pollock	11	NA	0.0344	3.44	UBC	Thomas	dna_new_BC_2011-12-13.csv
Pv12.079	Comox	49.6016	-124.8904	12	6	2012	Harbour seal	ONCKIS	Oncorhynchus_kisutch	Coho_Salmon	4	23	0.0245	2.45	UBC	Thomas	dna_new_BC_2011-12-13.csv
Pv12.079	Comox	49.6016	-124.8904	12	6	2012	Harbour seal	ONCMYK	Oncorhynchus_mykiss	Steelhead	NA	14	0.0149	1.49	UBC	Thomas	dna_new_BC_2011-12-13.csv
Pv12.079	Comox	49.6016	-124.8904	12	6	2012	Harbour seal	ONCTSH	Oncorhynchus_tshawytscha	Chinook_Salmon	3	37	0.0394	3.94	UBC	Thomas	dna_new_BC_2011-12-13.csv
Pv12.079	Comox	49.6016	-124.8904	12	6	2012	Harbour seal	SALSAL	Salmo_salar	Atlantic_Salmon	NA	2	0.0021	0.21	UBC	Thomas	dna_new_BC_2011-12-13.csv
Pv12.079	Comox	49.6016	-124.8904	12	6	2012	Harbour seal	GADCHA	Gadus_chalcogrammus	Walleye_Pollock	40	NA	0.2286	22.86	UBC	Thomas	dna_new_BC_2011-12-13.csv
Pv12.079	Comox	49.6016	-124.8904	12	6	2012	Harbour seal	ONCKET	Oncorhynchus_keta	Chum_Salmon	12	12	0.0128	1.28	UBC	Thomas	dna_new_BC_2011-12-13.csv
Pv12.079	Comox	49.6016	-124.8904	12	6	2012	Harbour seal	HYDCOL	Hydrolagus_colliei	Spotted_Ratfish	2	NA	0.0114	1.14	UBC	Thomas	dna_new_BC_2011-12-13.csv
Pv12.079	Comox	49.6016	-124.8904	12	6	2012	Harbour seal	LUMSAG	Lumpenus_sagitta	Snake_Prickleback	2	NA	0.0114	1.14	UBC	Thomas	dna_new_BC_2011-12-13.csv
Pv12.079	Comox	49.6016	-124.8904	12	6	2012	Harbour seal	ONCGOR	Oncorhynchus_gorbuscha	Pink_Salmon	NA	14	0.0149	1.49	UBC	Thomas	dna_new_BC_2011-12-13.csv
Pv12.079	Comox	49.6016	-124.8904	12	6	2012	Harbour seal	ALOSAP	Alosa_sapidissima	American_Shad	2	NA	0.0114	1.14	UBC	Thomas	dna_new_BC_2011-12-13.csv
Pv12.079	Comox	49.6016	-124.8904	12	6	2012	Harbour seal	AMMHEX	Ammodytes_hexapterus	Pacific_Sand_Lance	65	NA	0.3714	37.14	UBC	Thomas	dna_new_BC_2011-12-13.csv
Pv12.079	Comox	49.6016	-124.8904	12	6	2012	Harbour seal	CLUPAL	Clupea_pallasii	Pacific_Herring	39	NA	0.2229	22.29	UBC	Thomas	dna_new_BC_2011-12-13.csv
Pv12.079	Comox	49.6016	-124.8904	12	6	2012	Harbour seal	GASACU	Gasterosteus_aculeatus	Threespine_Stickleback	6	NA	0.0343	3.43	UBC	Thomas	dna_new_BC_2011-12-13.csv
Pv12.080	Comox	49.6016	-124.8904	12	6	2012	Harbour seal	ONCGOR	Oncorhynchus_gorbuscha	Pink_Salmon	1226	3478	0.2576	25.76	UBC	Thomas	dna_new_BC_2011-12-13.csv
Pv12.080	Comox	49.6016	-124.8904	12	6	2012	Harbour seal	ONCKET	Oncorhynchus_keta	Chum_Salmon	722	740	0.0548	5.48	UBC	Thomas	dna_new_BC_2011-12-13.csv
Pv12.080	Comox	49.6016	-124.8904	12	6	2012	Harbour seal	ONCKIS	Oncorhynchus_kisutch	Coho_Salmon	2642	9285	0.6876	68.76	UBC	Thomas	dna_new_BC_2011-12-13.csv
Pv12.081	Comox	49.6016	-124.8904	12	6	2012	Harbour seal	CLUPAL	Clupea_pallasii	Pacific_Herring	29	NA	0.0278	2.78	UBC	Thomas	dna_new_BC_2011-12-13.csv
Pv12.081	Comox	49.6016	-124.8904	12	6	2012	Harbour seal	MERPRO	Merluccius_productus	Pacific_Hake	1014	NA	0.9722	97.22	UBC	Thomas	dna_new_BC_2011-12-13.csv
Pv12.082	Comox	49.6016	-124.8904	12	6	2012	Harbour seal	ALOSAP	Alosa_sapidissima	American_Shad	2	NA	0.0260	2.60	UBC	Thomas	dna_new_BC_2011-12-13.csv
Pv12.082	Comox	49.6016	-124.8904	12	6	2012	Harbour seal	AMMHEX	Ammodytes_hexapterus	Pacific_Sand_Lance	1	NA	0.0130	1.30	UBC	Thomas	dna_new_BC_2011-12-13.csv
Pv12.082	Comox	49.6016	-124.8904	12	6	2012	Harbour seal	CLUPAL	Clupea_pallasii	Pacific_Herring	21	NA	0.2727	27.27	UBC	Thomas	dna_new_BC_2011-12-13.csv
Pv12.082	Comox	49.6016	-124.8904	12	6	2012	Harbour seal	LAMAYR	Lampetra_ayresii	River_Lamprey	2	NA	0.0260	2.60	UBC	Thomas	dna_new_BC_2011-12-13.csv
Pv12.082	Comox	49.6016	-124.8904	12	6	2012	Harbour seal	LEUSCH	Leuroglossus_schmidti	Northern_Smoothtongue	1	NA	0.0130	1.30	UBC	Thomas	dna_new_BC_2011-12-13.csv
Pv12.082	Comox	49.6016	-124.8904	12	6	2012	Harbour seal	MERPRO	Merluccius_productus	Pacific_Hake	4	NA	0.0519	5.19	UBC	Thomas	dna_new_BC_2011-12-13.csv
Pv12.082	Comox	49.6016	-124.8904	12	6	2012	Harbour seal	ONCKET	Oncorhynchus_keta	Chum_Salmon	18	NA	0.2338	23.38	UBC	Thomas	dna_new_BC_2011-12-13.csv
Pv12.082	Comox	49.6016	-124.8904	12	6	2012	Harbour seal	ONCKIS	Oncorhynchus_kisutch	Coho_Salmon	18	NA	0.2338	23.38	UBC	Thomas	dna_new_BC_2011-12-13.csv
Pv12.082	Comox	49.6016	-124.8904	12	6	2012	Harbour seal	ONCTSH	Oncorhynchus_tshawytscha	Chinook_Salmon	1	NA	0.0130	1.30	UBC	Thomas	dna_new_BC_2011-12-13.csv
Pv12.082	Comox	49.6016	-124.8904	12	6	2012	Harbour seal	RAJBIN	Raja_binoculata	Big_Skate	1	NA	0.0130	1.30	UBC	Thomas	dna_new_BC_2011-12-13.csv
Pv12.082	Comox	49.6016	-124.8904	12	6	2012	Harbour seal	GADCHA	Gadus_chalcogrammus	Walleye_Pollock	8	NA	0.1039	10.39	UBC	Thomas	dna_new_BC_2011-12-13.csv
Pv12.083	Comox	49.6016	-124.8904	12	6	2012	Harbour seal	LUMSAG	Lumpenus_sagitta	Snake_Prickleback	1993	NA	0.9596	95.96	UBC	Thomas	dna_new_BC_2011-12-13.csv
Pv12.083	Comox	49.6016	-124.8904	12	6	2012	Harbour seal	CLUPAL	Clupea_pallasii	Pacific_Herring	29	NA	0.0140	1.40	UBC	Thomas	dna_new_BC_2011-12-13.csv
Pv12.083	Comox	49.6016	-124.8904	12	6	2012	Harbour seal	ONCKIS	Oncorhynchus_kisutch	Coho_Salmon	NA	3	0.0066	0.66	UBC	Thomas	dna_new_BC_2011-12-13.csv
Pv12.083	Comox	49.6016	-124.8904	12	6	2012	Harbour seal	ONCKET	Oncorhynchus_keta	Chum_Salmon	55	2	0.0044	0.44	UBC	Thomas	dna_new_BC_2011-12-13.csv
Pv12.083	Comox	49.6016	-124.8904	12	6	2012	Harbour seal	ONCTSH	Oncorhynchus_tshawytscha	Chinook_Salmon	NA	4	0.0088	0.88	UBC	Thomas	dna_new_BC_2011-12-13.csv
Pv12.083	Comox	49.6016	-124.8904	12	6	2012	Harbour seal	ONCNER	Oncorhynchus_nerka	Sockeye_Salmon	NA	3	0.0066	0.66	UBC	Thomas	dna_new_BC_2011-12-13.csv
Pv12.084	Comox	49.6016	-124.8904	12	6	2012	Harbour seal	CLUPAL	Clupea_pallasii	Pacific_Herring	2993	NA	1.0000	100.00	UBC	Thomas	dna_new_BC_2011-12-13.csv
Pv12.085	Comox	49.6016	-124.8904	12	6	2012	Harbour seal	ENTDOF	Enteroctopus_dofleini	Giant_Pacific_Octopus	173	NA	0.7149	71.49	UBC	Thomas	dna_new_BC_2011-12-13.csv
Pv12.085	Comox	49.6016	-124.8904	12	6	2012	Harbour seal	GASACU	Gasterosteus_aculeatus	Threespine_Stickleback	3	NA	0.0124	1.24	UBC	Thomas	dna_new_BC_2011-12-13.csv
Pv12.085	Comox	49.6016	-124.8904	12	6	2012	Harbour seal	MERPRO	Merluccius_productus	Pacific_Hake	4	NA	0.0165	1.65	UBC	Thomas	dna_new_BC_2011-12-13.csv
Pv12.085	Comox	49.6016	-124.8904	12	6	2012	Harbour seal	CLUPAL	Clupea_pallasii	Pacific_Herring	25	NA	0.1033	10.33	UBC	Thomas	dna_new_BC_2011-12-13.csv
Pv12.085	Comox	49.6016	-124.8904	12	6	2012	Harbour seal	ONCGOR	Oncorhynchus_gorbuscha	Pink_Salmon	21	NA	0.0868	8.68	UBC	Thomas	dna_new_BC_2011-12-13.csv
Pv12.085	Comox	49.6016	-124.8904	12	6	2012	Harbour seal	ONCKIS	Oncorhynchus_kisutch	Coho_Salmon	3	NA	0.0124	1.24	UBC	Thomas	dna_new_BC_2011-12-13.csv
Pv12.085	Comox	49.6016	-124.8904	12	6	2012	Harbour seal	GADCHA	Gadus_chalcogrammus	Walleye_Pollock	13	NA	0.0537	5.37	UBC	Thomas	dna_new_BC_2011-12-13.csv
Pv12.086	Comox	49.6016	-124.8904	12	6	2012	Harbour seal	RAJBIN	Raja_binoculata	Big_Skate	2	NA	0.0161	1.61	UBC	Thomas	dna_new_BC_2011-12-13.csv
Pv12.086	Comox	49.6016	-124.8904	12	6	2012	Harbour seal	CLUPAL	Clupea_pallasii	Pacific_Herring	19	NA	0.1532	15.32	UBC	Thomas	dna_new_BC_2011-12-13.csv
Pv12.086	Comox	49.6016	-124.8904	12	6	2012	Harbour seal	ONCGOR	Oncorhynchus_gorbuscha	Pink_Salmon	83	NA	0.6694	66.94	UBC	Thomas	dna_new_BC_2011-12-13.csv
Pv12.086	Comox	49.6016	-124.8904	12	6	2012	Harbour seal	PARVET	Parophrys_vetulus	English_Sole	3	NA	0.0242	2.42	UBC	Thomas	dna_new_BC_2011-12-13.csv
Pv12.086	Comox	49.6016	-124.8904	12	6	2012	Harbour seal	GADCHA	Gadus_chalcogrammus	Walleye_Pollock	13	NA	0.1048	10.48	UBC	Thomas	dna_new_BC_2011-12-13.csv
Pv12.086	Comox	49.6016	-124.8904	12	6	2012	Harbour seal	ONCKET	Oncorhynchus_keta	Chum_Salmon	2	NA	0.0161	1.61	UBC	Thomas	dna_new_BC_2011-12-13.csv
Pv12.086	Comox	49.6016	-124.8904	12	6	2012	Harbour seal	MERPRO	Merluccius_productus	Pacific_Hake	2	NA	0.0161	1.61	UBC	Thomas	dna_new_BC_2011-12-13.csv
Pv12.087	Comox	49.6016	-124.8904	12	6	2012	Harbour seal	CLUPAL	Clupea_pallasii	Pacific_Herring	18	NA	0.0167	1.67	UBC	Thomas	dna_new_BC_2011-12-13.csv
Pv12.087	Comox	49.6016	-124.8904	12	6	2012	Harbour seal	ONCTSH	Oncorhynchus_tshawytscha	Chinook_Salmon	1058	8382	0.9833	98.33	UBC	Thomas	dna_new_BC_2011-12-13.csv
Pv12.088	Comox	49.6016	-124.8904	12	6	2012	Harbour seal	ONCGOR	Oncorhynchus_gorbuscha	Pink_Salmon	NA	472	0.0495	4.95	UBC	Thomas	dna_new_BC_2011-12-13.csv
Pv12.088	Comox	49.6016	-124.8904	12	6	2012	Harbour seal	ONCKET	Oncorhynchus_keta	Chum_Salmon	NA	410	0.0430	4.30	UBC	Thomas	dna_new_BC_2011-12-13.csv
Pv12.088	Comox	49.6016	-124.8904	12	6	2012	Harbour seal	CLUPAL	Clupea_pallasii	Pacific_Herring	187	NA	0.2152	21.52	UBC	Thomas	dna_new_BC_2011-12-13.csv
Pv12.088	Comox	49.6016	-124.8904	12	6	2012	Harbour seal	ONCKIS	Oncorhynchus_kisutch	Coho_Salmon	682	4303	0.4514	45.14	UBC	Thomas	dna_new_BC_2011-12-13.csv
Pv12.088	Comox	49.6016	-124.8904	12	6	2012	Harbour seal	ONCMYK	Oncorhynchus_mykiss	Steelhead	NA	371	0.0389	3.89	UBC	Thomas	dna_new_BC_2011-12-13.csv
Pv12.088	Comox	49.6016	-124.8904	12	6	2012	Harbour seal	ONCTSH	Oncorhynchus_tshawytscha	Chinook_Salmon	NA	1926	0.2020	20.20	UBC	Thomas	dna_new_BC_2011-12-13.csv
Pv12.089	Comox	49.6016	-124.8904	12	6	2012	Harbour seal	MERPRO	Merluccius_productus	Pacific_Hake	2	NA	0.0121	1.21	UBC	Thomas	dna_new_BC_2011-12-13.csv
Pv12.089	Comox	49.6016	-124.8904	12	6	2012	Harbour seal	ONCGOR	Oncorhynchus_gorbuscha	Pink_Salmon	NA	1	0.0007	0.07	UBC	Thomas	dna_new_BC_2011-12-13.csv
Pv12.089	Comox	49.6016	-124.8904	12	6	2012	Harbour seal	ONCKET	Oncorhynchus_keta	Chum_Salmon	NA	3	0.0021	0.21	UBC	Thomas	dna_new_BC_2011-12-13.csv
Pv12.089	Comox	49.6016	-124.8904	12	6	2012	Harbour seal	ONCKIS	Oncorhynchus_kisutch	Coho_Salmon	3	4	0.0028	0.28	UBC	Thomas	dna_new_BC_2011-12-13.csv
Pv12.089	Comox	49.6016	-124.8904	12	6	2012	Harbour seal	ONCMYK	Oncorhynchus_mykiss	Steelhead	NA	7	0.0049	0.49	UBC	Thomas	dna_new_BC_2011-12-13.csv
Pv12.089	Comox	49.6016	-124.8904	12	6	2012	Harbour seal	ONCTSH	Oncorhynchus_tshawytscha	Chinook_Salmon	NA	11	0.0077	0.77	UBC	Thomas	dna_new_BC_2011-12-13.csv
Pv12.089	Comox	49.6016	-124.8904	12	6	2012	Harbour seal	RAJBIN	Raja_binoculata	Big_Skate	3	NA	0.0182	1.82	UBC	Thomas	dna_new_BC_2011-12-13.csv
Pv12.089	Comox	49.6016	-124.8904	12	6	2012	Harbour seal	GADCHA	Gadus_chalcogrammus	Walleye_Pollock	16	NA	0.0970	9.70	UBC	Thomas	dna_new_BC_2011-12-13.csv
Pv12.089	Comox	49.6016	-124.8904	12	6	2012	Harbour seal	ALOSAP	Alosa_sapidissima	American_Shad	2	NA	0.0121	1.21	UBC	Thomas	dna_new_BC_2011-12-13.csv
Pv12.089	Comox	49.6016	-124.8904	12	6	2012	Harbour seal	CLUPAL	Clupea_pallasii	Pacific_Herring	137	NA	0.8303	83.03	UBC	Thomas	dna_new_BC_2011-12-13.csv
Pv12.089	Comox	49.6016	-124.8904	12	6	2012	Harbour seal	LEUSCH	Leuroglossus_schmidti	Northern_Smoothtongue	2	NA	0.0121	1.21	UBC	Thomas	dna_new_BC_2011-12-13.csv
Pv12.090	Comox	49.6016	-124.8904	12	6	2012	Harbour seal	CLUPAL	Clupea_pallasii	Pacific_Herring	7	NA	0.0761	7.61	UBC	Thomas	dna_new_BC_2011-12-13.csv
Pv12.090	Comox	49.6016	-124.8904	12	6	2012	Harbour seal	ONCGOR	Oncorhynchus_gorbuscha	Pink_Salmon	NA	2	0.0019	0.19	UBC	Thomas	dna_new_BC_2011-12-13.csv
Pv12.090	Comox	49.6016	-124.8904	12	6	2012	Harbour seal	ONCKET	Oncorhynchus_keta	Chum_Salmon	NA	2	0.0019	0.19	UBC	Thomas	dna_new_BC_2011-12-13.csv
Pv12.090	Comox	49.6016	-124.8904	12	6	2012	Harbour seal	ONCKIS	Oncorhynchus_kisutch	Coho_Salmon	NA	6	0.0057	0.57	UBC	Thomas	dna_new_BC_2011-12-13.csv
Pv12.090	Comox	49.6016	-124.8904	12	6	2012	Harbour seal	ONCMYK	Oncorhynchus_mykiss	Steelhead	NA	4	0.0038	0.38	UBC	Thomas	dna_new_BC_2011-12-13.csv
Pv12.090	Comox	49.6016	-124.8904	12	6	2012	Harbour seal	ONCTSH	Oncorhynchus_tshawytscha	Chinook_Salmon	2	9	0.0085	0.85	UBC	Thomas	dna_new_BC_2011-12-13.csv
Pv12.090	Comox	49.6016	-124.8904	12	6	2012	Harbour seal	PARVET	Parophrys_vetulus	English_Sole	22	NA	0.2391	23.91	UBC	Thomas	dna_new_BC_2011-12-13.csv
Pv12.090	Comox	49.6016	-124.8904	12	6	2012	Harbour seal	NA	Lepidopsetta_bilineata_OR_ Platichthys_stellatus	Rock_Sole_OR_Starry_Flounder	56	NA	0.6087	60.87	UBC	Thomas	dna_new_BC_2011-12-13.csv
Pv12.090	Comox	49.6016	-124.8904	12	6	2012	Harbour seal	GADCHA	Gadus_chalcogrammus	Walleye_Pollock	5	NA	0.0543	5.43	UBC	Thomas	dna_new_BC_2011-12-13.csv
Pv12.091	Comox	49.6016	-124.8904	12	6	2012	Harbour seal	CLUPAL	Clupea_pallasii	Pacific_Herring	529	NA	0.6039	60.39	UBC	Thomas	dna_new_BC_2011-12-13.csv
Pv12.091	Comox	49.6016	-124.8904	12	6	2012	Harbour seal	MICPRO	Microgadus_proximus	Pacific_Tomcod	135	NA	0.1541	15.41	UBC	Thomas	dna_new_BC_2011-12-13.csv
Pv12.091	Comox	49.6016	-124.8904	12	6	2012	Harbour seal	PHOORN	Pholis_ornata	Saddleback_Gunnel	143	NA	0.1632	16.32	UBC	Thomas	dna_new_BC_2011-12-13.csv
Pv12.091	Comox	49.6016	-124.8904	12	6	2012	Harbour seal	PORNOT	Porichthys_notatus	Plainfin_Midshipman	60	NA	0.0685	6.85	UBC	Thomas	dna_new_BC_2011-12-13.csv
Pv12.091	Comox	49.6016	-124.8904	12	6	2012	Harbour seal	GADCHA	Gadus_chalcogrammus	Walleye_Pollock	9	NA	0.0103	1.03	UBC	Thomas	dna_new_BC_2011-12-13.csv
Pv12.092	Comox	49.6016	-124.8904	12	6	2012	Harbour seal	CLUPAL	Clupea_pallasii	Pacific_Herring	31	NA	0.0379	3.79	UBC	Thomas	dna_new_BC_2011-12-13.csv
Pv12.092	Comox	49.6016	-124.8904	12	6	2012	Harbour seal	PARVET	Parophrys_vetulus	English_Sole	57	NA	0.0698	6.98	UBC	Thomas	dna_new_BC_2011-12-13.csv
Pv12.092	Comox	49.6016	-124.8904	12	6	2012	Harbour seal	NA	Lepidopsetta_bilineata_OR_ Platichthys_stellatus	Rock_Sole_OR_Starry_Flounder	718	NA	0.8788	87.88	UBC	Thomas	dna_new_BC_2011-12-13.csv
Pv12.092	Comox	49.6016	-124.8904	12	6	2012	Harbour seal	GADCHA	Gadus_chalcogrammus	Walleye_Pollock	11	NA	0.0135	1.35	UBC	Thomas	dna_new_BC_2011-12-13.csv
Pv12.093	Comox	49.6016	-124.8904	12	6	2012	Harbour seal	CLUPAL	Clupea_pallasii	Pacific_Herring	785	NA	0.3362	33.62	UBC	Thomas	dna_new_BC_2011-12-13.csv
Pv12.093	Comox	49.6016	-124.8904	12	6	2012	Harbour seal	ONCKET	Oncorhynchus_keta	Chum_Salmon	1032	2667	0.2964	29.64	UBC	Thomas	dna_new_BC_2011-12-13.csv
Pv12.093	Comox	49.6016	-124.8904	12	6	2012	Harbour seal	ONCKIS	Oncorhynchus_kisutch	Coho_Salmon	518	3305	0.3674	36.74	UBC	Thomas	dna_new_BC_2011-12-13.csv
Pv12.094	Comox	49.6016	-124.8904	12	6	2012	Harbour seal	MERPRO	Merluccius_productus	Pacific_Hake	1363	NA	0.9708	97.08	UBC	Thomas	dna_new_BC_2011-12-13.csv
Pv12.094	Comox	49.6016	-124.8904	12	6	2012	Harbour seal	GADCHA	Gadus_chalcogrammus	Walleye_Pollock	20	NA	0.0142	1.42	UBC	Thomas	dna_new_BC_2011-12-13.csv
Pv12.094	Comox	49.6016	-124.8904	12	6	2012	Harbour seal	CLUPAL	Clupea_pallasii	Pacific_Herring	21	NA	0.0150	1.50	UBC	Thomas	dna_new_BC_2011-12-13.csv
Pv12.095	Comox	49.6016	-124.8904	12	6	2012	Harbour seal	ALOSAP	Alosa_sapidissima	American_Shad	4	NA	0.0449	4.49	UBC	Thomas	dna_new_BC_2011-12-13.csv
Pv12.095	Comox	49.6016	-124.8904	12	6	2012	Harbour seal	CLUPAL	Clupea_pallasii	Pacific_Herring	43	NA	0.4831	48.31	UBC	Thomas	dna_new_BC_2011-12-13.csv
Pv12.095	Comox	49.6016	-124.8904	12	6	2012	Harbour seal	GASACU	Gasterosteus_aculeatus	Threespine_Stickleback	3	NA	0.0337	3.37	UBC	Thomas	dna_new_BC_2011-12-13.csv
Pv12.095	Comox	49.6016	-124.8904	12	6	2012	Harbour seal	HYDCOL	Hydrolagus_colliei	Spotted_Ratfish	1	NA	0.0112	1.12	UBC	Thomas	dna_new_BC_2011-12-13.csv
Pv12.095	Comox	49.6016	-124.8904	12	6	2012	Harbour seal	HYPPRE	Hypomesus_pretiosus	Surf_Smelt	1	NA	0.0112	1.12	UBC	Thomas	dna_new_BC_2011-12-13.csv
Pv12.095	Comox	49.6016	-124.8904	12	6	2012	Harbour seal	LAMAYR	Lampetra_ayresii	River_Lamprey	2	NA	0.0225	2.25	UBC	Thomas	dna_new_BC_2011-12-13.csv
Pv12.095	Comox	49.6016	-124.8904	12	6	2012	Harbour seal	LEUSCH	Leuroglossus_schmidti	Northern_Smoothtongue	1	NA	0.0112	1.12	UBC	Thomas	dna_new_BC_2011-12-13.csv
Pv12.095	Comox	49.6016	-124.8904	12	6	2012	Harbour seal	LUMSAG	Lumpenus_sagitta	Snake_Prickleback	1	NA	0.0112	1.12	UBC	Thomas	dna_new_BC_2011-12-13.csv
Pv12.095	Comox	49.6016	-124.8904	12	6	2012	Harbour seal	MERPRO	Merluccius_productus	Pacific_Hake	5	NA	0.0562	5.62	UBC	Thomas	dna_new_BC_2011-12-13.csv
Pv12.095	Comox	49.6016	-124.8904	12	6	2012	Harbour seal	ONCNER	Oncorhynchus_nerka	Sockeye_Salmon	3	7	0.1348	13.48	UBC	Thomas	dna_new_BC_2011-12-13.csv
Pv12.095	Comox	49.6016	-124.8904	12	6	2012	Harbour seal	GADCHA	Gadus_chalcogrammus	Walleye_Pollock	16	NA	0.1798	17.98	UBC	Thomas	dna_new_BC_2011-12-13.csv
Pv12.096	Comox	49.6016	-124.8904	12	6	2012	Harbour seal	CLUPAL	Clupea_pallasii	Pacific_Herring	1720	NA	1.0000	100.00	UBC	Thomas	dna_new_BC_2011-12-13.csv
Pv12.097	Comox	49.6016	-124.8904	12	6	2012	Harbour seal	ALOSAP	Alosa_sapidissima	American_Shad	1	NA	0.0192	1.92	UBC	Thomas	dna_new_BC_2011-12-13.csv
Pv12.097	Comox	49.6016	-124.8904	12	6	2012	Harbour seal	CLUPAL	Clupea_pallasii	Pacific_Herring	15	NA	0.2885	28.85	UBC	Thomas	dna_new_BC_2011-12-13.csv
Pv12.097	Comox	49.6016	-124.8904	12	6	2012	Harbour seal	GADMAC	Gadus_macrocephalus	Pacific_Cod	3	NA	0.0577	5.77	UBC	Thomas	dna_new_BC_2011-12-13.csv
Pv12.097	Comox	49.6016	-124.8904	12	6	2012	Harbour seal	GASACU	Gasterosteus_aculeatus	Threespine_Stickleback	1	NA	0.0192	1.92	UBC	Thomas	dna_new_BC_2011-12-13.csv
Pv12.097	Comox	49.6016	-124.8904	12	6	2012	Harbour seal	HIPROB	Hippoglossoides_elassodon	Flathead_sole	1	NA	0.0192	1.92	UBC	Thomas	dna_new_BC_2011-12-13.csv
Pv12.097	Comox	49.6016	-124.8904	12	6	2012	Harbour seal	LEPARM	Leptocottus_armatus	Pacific_Staghorn_Sculpin	3	NA	0.0577	5.77	UBC	Thomas	dna_new_BC_2011-12-13.csv
Pv12.097	Comox	49.6016	-124.8904	12	6	2012	Harbour seal	LYCPAC	Lycodes_pacificus	Blackbelly_Eelpout	1	NA	0.0192	1.92	UBC	Thomas	dna_new_BC_2011-12-13.csv
Pv12.097	Comox	49.6016	-124.8904	12	6	2012	Harbour seal	MERPRO	Merluccius_productus	Pacific_Hake	2	NA	0.0385	3.85	UBC	Thomas	dna_new_BC_2011-12-13.csv
Pv12.097	Comox	49.6016	-124.8904	12	6	2012	Harbour seal	ONCGOR	Oncorhynchus_gorbuscha	Pink_Salmon	NA	3	0.0188	1.88	UBC	Thomas	dna_new_BC_2011-12-13.csv
Pv12.097	Comox	49.6016	-124.8904	12	6	2012	Harbour seal	ONCKIS	Oncorhynchus_kisutch	Coho_Salmon	3	4	0.0250	2.50	UBC	Thomas	dna_new_BC_2011-12-13.csv
Pv12.097	Comox	49.6016	-124.8904	12	6	2012	Harbour seal	ONCMYK	Oncorhynchus_mykiss	Steelhead	NA	2	0.0125	1.25	UBC	Thomas	dna_new_BC_2011-12-13.csv
Pv12.097	Comox	49.6016	-124.8904	12	6	2012	Harbour seal	ONCNER	Oncorhynchus_nerka	Sockeye_Salmon	8	13	0.0814	8.14	UBC	Thomas	dna_new_BC_2011-12-13.csv
Pv12.097	Comox	49.6016	-124.8904	12	6	2012	Harbour seal	ONCTSH	Oncorhynchus_tshawytscha	Chinook_Salmon	3	21	0.1315	13.15	UBC	Thomas	dna_new_BC_2011-12-13.csv
Pv12.097	Comox	49.6016	-124.8904	12	6	2012	Harbour seal	OPHELO	Ophiodon_elongatus	Lingcod	2	NA	0.0385	3.85	UBC	Thomas	dna_new_BC_2011-12-13.csv
Pv12.097	Comox	49.6016	-124.8904	12	6	2012	Harbour seal	NA	Lepidopsetta_bilineata_OR_ Platichthys_stellatus	Rock_Sole_OR_Starry_Flounder	2	NA	0.0385	3.85	UBC	Thomas	dna_new_BC_2011-12-13.csv
Pv12.097	Comox	49.6016	-124.8904	12	6	2012	Harbour seal	PORNOT	Porichthys_notatus	Plainfin_Midshipman	1	NA	0.0192	1.92	UBC	Thomas	dna_new_BC_2011-12-13.csv
Pv12.097	Comox	49.6016	-124.8904	12	6	2012	Harbour seal	PSYPAR	Psychrolutes_paradoxus	Tadpole_Sculpin	2	NA	0.0385	3.85	UBC	Thomas	dna_new_BC_2011-12-13.csv
Pv12.097	Comox	49.6016	-124.8904	12	6	2012	Harbour seal	GADCHA	Gadus_chalcogrammus	Walleye_Pollock	4	NA	0.0769	7.69	UBC	Thomas	dna_new_BC_2011-12-13.csv
Pv12.098	Comox	49.6016	-124.8904	12	6	2012	Harbour seal	LUMSAG	Lumpenus_sagitta	Snake_Prickleback	1890	NA	1.0000	100.00	UBC	Thomas	dna_new_BC_2011-12-13.csv
Pv12.099	Comox	49.6016	-124.8904	12	6	2012	Harbour seal	GADCHA	Gadus_chalcogrammus	Walleye_Pollock	334	NA	0.4897	48.97	UBC	Thomas	dna_new_BC_2011-12-13.csv
Pv12.099	Comox	49.6016	-124.8904	12	6	2012	Harbour seal	CLUPAL	Clupea_pallasii	Pacific_Herring	144	NA	0.2111	21.11	UBC	Thomas	dna_new_BC_2011-12-13.csv
Pv12.099	Comox	49.6016	-124.8904	12	6	2012	Harbour seal	MICPRO	Microgadus_proximus	Pacific_Tomcod	175	NA	0.2566	25.66	UBC	Thomas	dna_new_BC_2011-12-13.csv
Pv12.099	Comox	49.6016	-124.8904	12	6	2012	Harbour seal	ONCGOR	Oncorhynchus_gorbuscha	Pink_Salmon	NA	14	0.0024	0.24	UBC	Thomas	dna_new_BC_2011-12-13.csv
Pv12.099	Comox	49.6016	-124.8904	12	6	2012	Harbour seal	ONCKIS	Oncorhynchus_kisutch	Coho_Salmon	NA	29	0.0050	0.50	UBC	Thomas	dna_new_BC_2011-12-13.csv
Pv12.099	Comox	49.6016	-124.8904	12	6	2012	Harbour seal	ONCNER	Oncorhynchus_nerka	Sockeye_Salmon	21	59	0.0101	1.01	UBC	Thomas	dna_new_BC_2011-12-13.csv
Pv12.099	Comox	49.6016	-124.8904	12	6	2012	Harbour seal	ONCTSH	Oncorhynchus_tshawytscha	Chinook_Salmon	8	147	0.0251	2.51	UBC	Thomas	dna_new_BC_2011-12-13.csv
Pv12.100	Comox	49.6016	-124.8904	12	6	2012	Harbour seal	MERPRO	Merluccius_productus	Pacific_Hake	4802	NA	1.0000	100.00	UBC	Thomas	dna_new_BC_2011-12-13.csv
Pv12.101	Comox	49.6016	-124.8904	12	6	2012	Harbour seal	CLUPAL	Clupea_pallasii	Pacific_Herring	1186	NA	0.6339	63.39	UBC	Thomas	dna_new_BC_2011-12-13.csv
Pv12.101	Comox	49.6016	-124.8904	12	6	2012	Harbour seal	GASACU	Gasterosteus_aculeatus	Threespine_Stickleback	201	NA	0.1074	10.74	UBC	Thomas	dna_new_BC_2011-12-13.csv
Pv12.101	Comox	49.6016	-124.8904	12	6	2012	Harbour seal	GADCHA	Gadus_chalcogrammus	Walleye_Pollock	484	NA	0.2587	25.87	UBC	Thomas	dna_new_BC_2011-12-13.csv
Pv12.102	Comox	49.6016	-124.8904	12	6	2012	Harbour seal	CLUPAL	Clupea_pallasii	Pacific_Herring	1581	NA	1.0000	100.00	UBC	Thomas	dna_new_BC_2011-12-13.csv
Pv12.103	Cowichan Bay	48.7562	-123.6223	13	6	2012	Harbour seal	CLUPAL	Clupea_pallasii	Pacific_Herring	2830	NA	1.0000	100.00	UBC	Thomas	dna_new_BC_2011-12-13.csv
Pv12.104	Cowichan Bay	48.7562	-123.6223	13	6	2012	Harbour seal	ALOSAP	Alosa_sapidissima	American_Shad	2	NA	0.0208	2.08	UBC	Thomas	dna_new_BC_2011-12-13.csv
Pv12.104	Cowichan Bay	48.7562	-123.6223	13	6	2012	Harbour seal	CLUPAL	Clupea_pallasii	Pacific_Herring	13	NA	0.1354	13.54	UBC	Thomas	dna_new_BC_2011-12-13.csv
Pv12.104	Cowichan Bay	48.7562	-123.6223	13	6	2012	Harbour seal	GASACU	Gasterosteus_aculeatus	Threespine_Stickleback	6	NA	0.0625	6.25	UBC	Thomas	dna_new_BC_2011-12-13.csv
Pv12.104	Cowichan Bay	48.7562	-123.6223	13	6	2012	Harbour seal	LEPARM	Leptocottus_armatus	Pacific_Staghorn_Sculpin	3	NA	0.0313	3.13	UBC	Thomas	dna_new_BC_2011-12-13.csv
Pv12.104	Cowichan Bay	48.7562	-123.6223	13	6	2012	Harbour seal	MERPRO	Merluccius_productus	Pacific_Hake	4	NA	0.0417	4.17	UBC	Thomas	dna_new_BC_2011-12-13.csv
Pv12.104	Cowichan Bay	48.7562	-123.6223	13	6	2012	Harbour seal	ONCGOR	Oncorhynchus_gorbuscha	Pink_Salmon	4	2	0.0200	2.00	UBC	Thomas	dna_new_BC_2011-12-13.csv
Pv12.104	Cowichan Bay	48.7562	-123.6223	13	6	2012	Harbour seal	ONCKIS	Oncorhynchus_kisutch	Coho_Salmon	3	7	0.0701	7.01	UBC	Thomas	dna_new_BC_2011-12-13.csv
Pv12.104	Cowichan Bay	48.7562	-123.6223	13	6	2012	Harbour seal	ONCNER	Oncorhynchus_nerka	Sockeye_Salmon	3	20	0.2003	20.03	UBC	Thomas	dna_new_BC_2011-12-13.csv
Pv12.104	Cowichan Bay	48.7562	-123.6223	13	6	2012	Harbour seal	ONCTSH	Oncorhynchus_tshawytscha	Chinook_Salmon	8	23	0.2304	23.04	UBC	Thomas	dna_new_BC_2011-12-13.csv
Pv12.104	Cowichan Bay	48.7562	-123.6223	13	6	2012	Harbour seal	OPHELO	Ophiodon_elongatus	Lingcod	2	NA	0.0208	2.08	UBC	Thomas	dna_new_BC_2011-12-13.csv
Pv12.104	Cowichan Bay	48.7562	-123.6223	13	6	2012	Harbour seal	NA	Lepidopsetta_bilineata_OR_ Platichthys_stellatus	Rock_Sole_OR_Starry_Flounder	1	NA	0.0104	1.04	UBC	Thomas	dna_new_BC_2011-12-13.csv
Pv12.104	Cowichan Bay	48.7562	-123.6223	13	6	2012	Harbour seal	PORNOT	Porichthys_notatus	Plainfin_Midshipman	5	NA	0.0521	5.21	UBC	Thomas	dna_new_BC_2011-12-13.csv
Pv12.104	Cowichan Bay	48.7562	-123.6223	13	6	2012	Harbour seal	PSYPAR	Psychrolutes_paradoxus	Tadpole_Sculpin	1	NA	0.0104	1.04	UBC	Thomas	dna_new_BC_2011-12-13.csv
Pv12.104	Cowichan Bay	48.7562	-123.6223	13	6	2012	Harbour seal	GADCHA	Gadus_chalcogrammus	Walleye_Pollock	9	NA	0.0938	9.38	UBC	Thomas	dna_new_BC_2011-12-13.csv
Pv12.105	Cowichan Bay	48.7562	-123.6223	13	6	2012	Harbour seal	GADCHA	Gadus_chalcogrammus	Walleye_Pollock	4158	NA	1.0000	100.00	UBC	Thomas	dna_new_BC_2011-12-13.csv
Pv12.106	Cowichan Bay	48.7562	-123.6223	13	6	2012	Harbour seal	CLUPAL	Clupea_pallasii	Pacific_Herring	1302	NA	1.0000	100.00	UBC	Thomas	dna_new_BC_2011-12-13.csv
Pv12.107	Cowichan Bay	48.7562	-123.6223	13	6	2012	Harbour seal	PORNOT	Porichthys_notatus	Plainfin_Midshipman	3	NA	0.0194	1.94	UBC	Thomas	dna_new_BC_2011-12-13.csv
Pv12.107	Cowichan Bay	48.7562	-123.6223	13	6	2012	Harbour seal	GADCHA	Gadus_chalcogrammus	Walleye_Pollock	2	NA	0.0129	1.29	UBC	Thomas	dna_new_BC_2011-12-13.csv
Pv12.107	Cowichan Bay	48.7562	-123.6223	13	6	2012	Harbour seal	CLUPAL	Clupea_pallasii	Pacific_Herring	97	NA	0.6258	62.58	UBC	Thomas	dna_new_BC_2011-12-13.csv
Pv12.107	Cowichan Bay	48.7562	-123.6223	13	6	2012	Harbour seal	GADMAC	Gadus_macrocephalus	Pacific_Cod	2	NA	0.0129	1.29	UBC	Thomas	dna_new_BC_2011-12-13.csv
Pv12.107	Cowichan Bay	48.7562	-123.6223	13	6	2012	Harbour seal	GASACU	Gasterosteus_aculeatus	Threespine_Stickleback	4	NA	0.0258	2.58	UBC	Thomas	dna_new_BC_2011-12-13.csv
Pv12.107	Cowichan Bay	48.7562	-123.6223	13	6	2012	Harbour seal	LEPARM	Leptocottus_armatus	Pacific_Staghorn_Sculpin	2	NA	0.0129	1.29	UBC	Thomas	dna_new_BC_2011-12-13.csv
Pv12.107	Cowichan Bay	48.7562	-123.6223	13	6	2012	Harbour seal	LOLOPA	Loligo_opalescens	California_Market_Squid	31	NA	0.2000	20.00	UBC	Thomas	dna_new_BC_2011-12-13.csv
Pv12.107	Cowichan Bay	48.7562	-123.6223	13	6	2012	Harbour seal	MERPRO	Merluccius_productus	Pacific_Hake	4	NA	0.0258	2.58	UBC	Thomas	dna_new_BC_2011-12-13.csv
Pv12.107	Cowichan Bay	48.7562	-123.6223	13	6	2012	Harbour seal	ONCGOR	Oncorhynchus_gorbuscha	Pink_Salmon	NA	1886	0.0620	6.20	UBC	Thomas	dna_new_BC_2011-12-13.csv
Pv12.107	Cowichan Bay	48.7562	-123.6223	13	6	2012	Harbour seal	ONCNER	Oncorhynchus_nerka	Sockeye_Salmon	4	38	0.0013	0.13	UBC	Thomas	dna_new_BC_2011-12-13.csv
Pv12.107	Cowichan Bay	48.7562	-123.6223	13	6	2012	Harbour seal	ONCTSH	Oncorhynchus_tshawytscha	Chinook_Salmon	4	37	0.0012	0.12	UBC	Thomas	dna_new_BC_2011-12-13.csv
Pv12.108	Cowichan Bay	48.7562	-123.6223	13	6	2012	Harbour seal	SALSAL	Salmo_salar	Atlantic_Salmon	NA	100	0.0056	0.56	UBC	Thomas	dna_new_BC_2011-12-13.csv
Pv12.108	Cowichan Bay	48.7562	-123.6223	13	6	2012	Harbour seal	GASACU	Gasterosteus_aculeatus	Threespine_Stickleback	1183	NA	0.6303	63.03	UBC	Thomas	dna_new_BC_2011-12-13.csv
Pv12.108	Cowichan Bay	48.7562	-123.6223	13	6	2012	Harbour seal	ONCNER	Oncorhynchus_nerka	Sockeye_Salmon	NA	73	0.0041	0.41	UBC	Thomas	dna_new_BC_2011-12-13.csv
Pv12.108	Cowichan Bay	48.7562	-123.6223	13	6	2012	Harbour seal	ONCTSH	Oncorhynchus_tshawytscha	Chinook_Salmon	455	4144	0.2327	23.27	UBC	Thomas	dna_new_BC_2011-12-13.csv
Pv12.108	Cowichan Bay	48.7562	-123.6223	13	6	2012	Harbour seal	PORNOT	Porichthys_notatus	Plainfin_Midshipman	239	NA	0.1273	12.73	UBC	Thomas	dna_new_BC_2011-12-13.csv
Pv12.109	Cowichan Bay	48.7562	-123.6223	13	6	2012	Harbour seal	PORNOT	Porichthys_notatus	Plainfin_Midshipman	1592	NA	1.0000	100.00	UBC	Thomas	dna_new_BC_2011-12-13.csv
Pv12.110	Cowichan Bay	48.7562	-123.6223	13	6	2012	Harbour seal	MERPRO	Merluccius_productus	Pacific_Hake	5	NA	0.0216	2.16	UBC	Thomas	dna_new_BC_2011-12-13.csv
Pv12.110	Cowichan Bay	48.7562	-123.6223	13	6	2012	Harbour seal	ONCGOR	Oncorhynchus_gorbuscha	Pink_Salmon	NA	11	0.0033	0.33	UBC	Thomas	dna_new_BC_2011-12-13.csv
Pv12.110	Cowichan Bay	48.7562	-123.6223	13	6	2012	Harbour seal	GADCHA	Gadus_chalcogrammus	Walleye_Pollock	10	NA	0.0431	4.31	UBC	Thomas	dna_new_BC_2011-12-13.csv
Pv12.110	Cowichan Bay	48.7562	-123.6223	13	6	2012	Harbour seal	OPHELO	Ophiodon_elongatus	Lingcod	3	NA	0.0129	1.29	UBC	Thomas	dna_new_BC_2011-12-13.csv
Pv12.110	Cowichan Bay	48.7562	-123.6223	13	6	2012	Harbour seal	AMMHEX	Ammodytes_hexapterus	Pacific_Sand_Lance	5	NA	0.0216	2.16	UBC	Thomas	dna_new_BC_2011-12-13.csv
Pv12.110	Cowichan Bay	48.7562	-123.6223	13	6	2012	Harbour seal	CLUPAL	Clupea_pallasii	Pacific_Herring	198	NA	0.8534	85.34	UBC	Thomas	dna_new_BC_2011-12-13.csv
Pv12.110	Cowichan Bay	48.7562	-123.6223	13	6	2012	Harbour seal	ONCKIS	Oncorhynchus_kisutch	Coho_Salmon	4	23	0.0070	0.70	UBC	Thomas	dna_new_BC_2011-12-13.csv
Pv12.110	Cowichan Bay	48.7562	-123.6223	13	6	2012	Harbour seal	ONCMYK	Oncorhynchus_mykiss	Steelhead	NA	2	0.0006	0.06	UBC	Thomas	dna_new_BC_2011-12-13.csv
Pv12.110	Cowichan Bay	48.7562	-123.6223	13	6	2012	Harbour seal	ONCNER	Oncorhynchus_nerka	Sockeye_Salmon	NA	45	0.0137	1.37	UBC	Thomas	dna_new_BC_2011-12-13.csv
Pv12.110	Cowichan Bay	48.7562	-123.6223	13	6	2012	Harbour seal	ONCTSH	Oncorhynchus_tshawytscha	Chinook_Salmon	7	75	0.0228	2.28	UBC	Thomas	dna_new_BC_2011-12-13.csv
Pv12.111	Cowichan Bay	48.7562	-123.6223	13	6	2012	Harbour seal	LEPARM	Leptocottus_armatus	Pacific_Staghorn_Sculpin	215	NA	0.0891	8.91	UBC	Thomas	dna_new_BC_2011-12-13.csv
Pv12.111	Cowichan Bay	48.7562	-123.6223	13	6	2012	Harbour seal	NA	Lepidopsetta_bilineata_OR_ Platichthys_stellatus	Rock_Sole_OR_Starry_Flounder	2199	NA	0.9109	91.09	UBC	Thomas	dna_new_BC_2011-12-13.csv
Pv12.112	Cowichan Bay	48.7562	-123.6223	13	6	2012	Harbour seal	CLUPAL	Clupea_pallasii	Pacific_Herring	225	NA	0.0918	9.18	UBC	Thomas	dna_new_BC_2011-12-13.csv
Pv12.112	Cowichan Bay	48.7562	-123.6223	13	6	2012	Harbour seal	PSYPAR	Psychrolutes_paradoxus	Tadpole_Sculpin	2225	NA	0.9082	90.82	UBC	Thomas	dna_new_BC_2011-12-13.csv
Pv12.113	Cowichan Bay	48.7562	-123.6223	13	6	2012	Harbour seal	CLUPAL	Clupea_pallasii	Pacific_Herring	405	NA	0.9574	95.74	UBC	Thomas	dna_new_BC_2011-12-13.csv
Pv12.113	Cowichan Bay	48.7562	-123.6223	13	6	2012	Harbour seal	MERPRO	Merluccius_productus	Pacific_Hake	7	NA	0.0165	1.65	UBC	Thomas	dna_new_BC_2011-12-13.csv
Pv12.113	Cowichan Bay	48.7562	-123.6223	13	6	2012	Harbour seal	ONCGOR	Oncorhynchus_gorbuscha	Pink_Salmon	NA	3	0.0017	0.17	UBC	Thomas	dna_new_BC_2011-12-13.csv
Pv12.113	Cowichan Bay	48.7562	-123.6223	13	6	2012	Harbour seal	ONCKIS	Oncorhynchus_kisutch	Coho_Salmon	NA	6	0.0034	0.34	UBC	Thomas	dna_new_BC_2011-12-13.csv
Pv12.113	Cowichan Bay	48.7562	-123.6223	13	6	2012	Harbour seal	ONCMYK	Oncorhynchus_mykiss	Steelhead	NA	2	0.0011	0.11	UBC	Thomas	dna_new_BC_2011-12-13.csv
Pv12.113	Cowichan Bay	48.7562	-123.6223	13	6	2012	Harbour seal	ONCNER	Oncorhynchus_nerka	Sockeye_Salmon	5	12	0.0068	0.68	UBC	Thomas	dna_new_BC_2011-12-13.csv
Pv12.113	Cowichan Bay	48.7562	-123.6223	13	6	2012	Harbour seal	ONCTSH	Oncorhynchus_tshawytscha	Chinook_Salmon	6	23	0.0130	1.30	UBC	Thomas	dna_new_BC_2011-12-13.csv
Pv12.114	Cowichan Bay	48.7562	-123.6223	13	6	2012	Harbour seal	CLUPAL	Clupea_pallasii	Pacific_Herring	162	NA	0.1695	16.95	UBC	Thomas	dna_new_BC_2011-12-13.csv
Pv12.114	Cowichan Bay	48.7562	-123.6223	13	6	2012	Harbour seal	ONCGOR	Oncorhynchus_gorbuscha	Pink_Salmon	NA	5	0.0004	0.04	UBC	Thomas	dna_new_BC_2011-12-13.csv
Pv12.114	Cowichan Bay	48.7562	-123.6223	13	6	2012	Harbour seal	ONCKET	Oncorhynchus_keta	Chum_Salmon	NA	2	0.0002	0.02	UBC	Thomas	dna_new_BC_2011-12-13.csv
Pv12.114	Cowichan Bay	48.7562	-123.6223	13	6	2012	Harbour seal	ONCKIS	Oncorhynchus_kisutch	Coho_Salmon	NA	19	0.0017	0.17	UBC	Thomas	dna_new_BC_2011-12-13.csv
Pv12.114	Cowichan Bay	48.7562	-123.6223	13	6	2012	Harbour seal	ONCNER	Oncorhynchus_nerka	Sockeye_Salmon	NA	76	0.0068	0.68	UBC	Thomas	dna_new_BC_2011-12-13.csv
Pv12.114	Cowichan Bay	48.7562	-123.6223	13	6	2012	Harbour seal	ONCTSH	Oncorhynchus_tshawytscha	Chinook_Salmon	16	86	0.0077	0.77	UBC	Thomas	dna_new_BC_2011-12-13.csv
Pv12.114	Cowichan Bay	48.7562	-123.6223	13	6	2012	Harbour seal	GADCHA	Gadus_chalcogrammus	Walleye_Pollock	778	NA	0.8138	81.38	UBC	Thomas	dna_new_BC_2011-12-13.csv
Pv12.115	Cowichan Bay	48.7562	-123.6223	13	6	2012	Harbour seal	CLUPAL	Clupea_pallasii	Pacific_Herring	82	NA	0.3504	35.04	UBC	Thomas	dna_new_BC_2011-12-13.csv
Pv12.115	Cowichan Bay	48.7562	-123.6223	13	6	2012	Harbour seal	LOLOPA	Loligo_opalescens	California_Market_Squid	22	NA	0.0940	9.40	UBC	Thomas	dna_new_BC_2011-12-13.csv
Pv12.115	Cowichan Bay	48.7562	-123.6223	13	6	2012	Harbour seal	MERPRO	Merluccius_productus	Pacific_Hake	5	NA	0.0214	2.14	UBC	Thomas	dna_new_BC_2011-12-13.csv
Pv12.115	Cowichan Bay	48.7562	-123.6223	13	6	2012	Harbour seal	ONCKIS	Oncorhynchus_kisutch	Coho_Salmon	110	2290	0.4946	49.46	UBC	Thomas	dna_new_BC_2011-12-13.csv
Pv12.115	Cowichan Bay	48.7562	-123.6223	13	6	2012	Harbour seal	ONCNER	Oncorhynchus_nerka	Sockeye_Salmon	6	34	0.0073	0.73	UBC	Thomas	dna_new_BC_2011-12-13.csv
Pv12.115	Cowichan Bay	48.7562	-123.6223	13	6	2012	Harbour seal	ONCTSH	Oncorhynchus_tshawytscha	Chinook_Salmon	5	70	0.0151	1.51	UBC	Thomas	dna_new_BC_2011-12-13.csv
Pv12.115	Cowichan Bay	48.7562	-123.6223	13	6	2012	Harbour seal	GADCHA	Gadus_chalcogrammus	Walleye_Pollock	4	NA	0.0171	1.71	UBC	Thomas	dna_new_BC_2011-12-13.csv
Pv12.116	Cowichan Bay	48.7562	-123.6223	13	6	2012	Harbour seal	CLUPAL	Clupea_pallasii	Pacific_Herring	818	NA	0.9844	98.44	UBC	Thomas	dna_new_BC_2011-12-13.csv
Pv12.116	Cowichan Bay	48.7562	-123.6223	13	6	2012	Harbour seal	GADCHA	Gadus_chalcogrammus	Walleye_Pollock	13	NA	0.0156	1.56	UBC	Thomas	dna_new_BC_2011-12-13.csv
Pv12.117	Cowichan Bay	48.7562	-123.6223	13	6	2012	Harbour seal	CLUPAL	Clupea_pallasii	Pacific_Herring	13	NA	0.0340	3.40	UBC	Thomas	dna_new_BC_2011-12-13.csv
Pv12.117	Cowichan Bay	48.7562	-123.6223	13	6	2012	Harbour seal	MERPRO	Merluccius_productus	Pacific_Hake	7	NA	0.0183	1.83	UBC	Thomas	dna_new_BC_2011-12-13.csv
Pv12.117	Cowichan Bay	48.7562	-123.6223	13	6	2012	Harbour seal	ONCGOR	Oncorhynchus_gorbuscha	Pink_Salmon	NA	1	0.0012	0.12	UBC	Thomas	dna_new_BC_2011-12-13.csv
Pv12.117	Cowichan Bay	48.7562	-123.6223	13	6	2012	Harbour seal	ONCNER	Oncorhynchus_nerka	Sockeye_Salmon	NA	9	0.0107	1.07	UBC	Thomas	dna_new_BC_2011-12-13.csv
Pv12.117	Cowichan Bay	48.7562	-123.6223	13	6	2012	Harbour seal	ONCTSH	Oncorhynchus_tshawytscha	Chinook_Salmon	5	1	0.0012	0.12	UBC	Thomas	dna_new_BC_2011-12-13.csv
Pv12.117	Cowichan Bay	48.7562	-123.6223	13	6	2012	Harbour seal	PSYPAR	Psychrolutes_paradoxus	Tadpole_Sculpin	5	NA	0.0131	1.31	UBC	Thomas	dna_new_BC_2011-12-13.csv
Pv12.117	Cowichan Bay	48.7562	-123.6223	13	6	2012	Harbour seal	GADCHA	Gadus_chalcogrammus	Walleye_Pollock	352	NA	0.9215	92.15	UBC	Thomas	dna_new_BC_2011-12-13.csv
Pv12.118	Cowichan Bay	48.7562	-123.6223	13	6	2012	Harbour seal	CLUPAL	Clupea_pallasii	Pacific_Herring	15	NA	0.2083	20.83	UBC	Thomas	dna_new_BC_2011-12-13.csv
Pv12.118	Cowichan Bay	48.7562	-123.6223	13	6	2012	Harbour seal	GADMAC	Gadus_macrocephalus	Pacific_Cod	2	NA	0.0278	2.78	UBC	Thomas	dna_new_BC_2011-12-13.csv
Pv12.118	Cowichan Bay	48.7562	-123.6223	13	6	2012	Harbour seal	PORNOT	Porichthys_notatus	Plainfin_Midshipman	1	NA	0.0139	1.39	UBC	Thomas	dna_new_BC_2011-12-13.csv
Pv12.118	Cowichan Bay	48.7562	-123.6223	13	6	2012	Harbour seal	GADCHA	Gadus_chalcogrammus	Walleye_Pollock	5	NA	0.0694	6.94	UBC	Thomas	dna_new_BC_2011-12-13.csv
Pv12.118	Cowichan Bay	48.7562	-123.6223	13	6	2012	Harbour seal	GASACU	Gasterosteus_aculeatus	Threespine_Stickleback	6	NA	0.0833	8.33	UBC	Thomas	dna_new_BC_2011-12-13.csv
Pv12.118	Cowichan Bay	48.7562	-123.6223	13	6	2012	Harbour seal	LAMAYR	Lampetra_ayresii	River_Lamprey	1	NA	0.0139	1.39	UBC	Thomas	dna_new_BC_2011-12-13.csv
Pv12.118	Cowichan Bay	48.7562	-123.6223	13	6	2012	Harbour seal	LEPARM	Leptocottus_armatus	Pacific_Staghorn_Sculpin	1	NA	0.0139	1.39	UBC	Thomas	dna_new_BC_2011-12-13.csv
Pv12.118	Cowichan Bay	48.7562	-123.6223	13	6	2012	Harbour seal	LYCPAC	Lycodes_pacificus	Blackbelly_Eelpout	4	NA	0.0556	5.56	UBC	Thomas	dna_new_BC_2011-12-13.csv
Pv12.118	Cowichan Bay	48.7562	-123.6223	13	6	2012	Harbour seal	MERPRO	Merluccius_productus	Pacific_Hake	10	NA	0.1389	13.89	UBC	Thomas	dna_new_BC_2011-12-13.csv
Pv12.118	Cowichan Bay	48.7562	-123.6223	13	6	2012	Harbour seal	ONCGOR	Oncorhynchus_gorbuscha	Pink_Salmon	2	NA	0.0278	2.78	UBC	Thomas	dna_new_BC_2011-12-13.csv
Pv12.118	Cowichan Bay	48.7562	-123.6223	13	6	2012	Harbour seal	ONCKIS	Oncorhynchus_kisutch	Coho_Salmon	7	NA	0.0972	9.72	UBC	Thomas	dna_new_BC_2011-12-13.csv
Pv12.118	Cowichan Bay	48.7562	-123.6223	13	6	2012	Harbour seal	ONCNER	Oncorhynchus_nerka	Sockeye_Salmon	11	NA	0.1528	15.28	UBC	Thomas	dna_new_BC_2011-12-13.csv
Pv12.118	Cowichan Bay	48.7562	-123.6223	13	6	2012	Harbour seal	ONCTSH	Oncorhynchus_tshawytscha	Chinook_Salmon	6	NA	0.0833	8.33	UBC	Thomas	dna_new_BC_2011-12-13.csv
Pv12.118	Cowichan Bay	48.7562	-123.6223	13	6	2012	Harbour seal	NA	Lepidopsetta_bilineata_OR_ Platichthys_stellatus	Rock_Sole_OR_Starry_Flounder	1	NA	0.0139	1.39	UBC	Thomas	dna_new_BC_2011-12-13.csv
Pv12.119	Cowichan Bay	48.7562	-123.6223	14	6	2012	Harbour seal	ONCMYK	Oncorhynchus_mykiss	Steelhead	NA	7	0.0006	0.06	UBC	Thomas	dna_new_BC_2011-12-13.csv
Pv12.119	Cowichan Bay	48.7562	-123.6223	14	6	2012	Harbour seal	ONCNER	Oncorhynchus_nerka	Sockeye_Salmon	NA	50	0.0040	0.40	UBC	Thomas	dna_new_BC_2011-12-13.csv
Pv12.119	Cowichan Bay	48.7562	-123.6223	14	6	2012	Harbour seal	ONCTSH	Oncorhynchus_tshawytscha	Chinook_Salmon	11	92	0.0073	0.73	UBC	Thomas	dna_new_BC_2011-12-13.csv
Pv12.119	Cowichan Bay	48.7562	-123.6223	14	6	2012	Harbour seal	CLUPAL	Clupea_pallasii	Pacific_Herring	740	NA	0.9854	98.54	UBC	Thomas	dna_new_BC_2011-12-13.csv
Pv12.119	Cowichan Bay	48.7562	-123.6223	14	6	2012	Harbour seal	ONCGOR	Oncorhynchus_gorbuscha	Pink_Salmon	NA	7	0.0006	0.06	UBC	Thomas	dna_new_BC_2011-12-13.csv
Pv12.119	Cowichan Bay	48.7562	-123.6223	14	6	2012	Harbour seal	ONCKIS	Oncorhynchus_kisutch	Coho_Salmon	NA	28	0.0022	0.22	UBC	Thomas	dna_new_BC_2011-12-13.csv
Pv12.120	Cowichan Bay	48.7562	-123.6223	4	7	2012	Harbour seal	ONCNER	Oncorhynchus_nerka	Sockeye_Salmon	NA	45	0.0756	7.56	UBC	Thomas	dna_new_BC_2011-12-13.csv
Pv12.120	Cowichan Bay	48.7562	-123.6223	4	7	2012	Harbour seal	ONCTSH	Oncorhynchus_tshawytscha	Chinook_Salmon	12	49	0.0823	8.23	UBC	Thomas	dna_new_BC_2011-12-13.csv
Pv12.120	Cowichan Bay	48.7562	-123.6223	4	7	2012	Harbour seal	CLUPAL	Clupea_pallasii	Pacific_Herring	813	NA	0.7916	79.16	UBC	Thomas	dna_new_BC_2011-12-13.csv
Pv12.120	Cowichan Bay	48.7562	-123.6223	4	7	2012	Harbour seal	ONCGOR	Oncorhynchus_gorbuscha	Pink_Salmon	202	7	0.0118	1.18	UBC	Thomas	dna_new_BC_2011-12-13.csv
Pv12.120	Cowichan Bay	48.7562	-123.6223	4	7	2012	Harbour seal	ONCKIS	Oncorhynchus_kisutch	Coho_Salmon	NA	23	0.0386	3.86	UBC	Thomas	dna_new_BC_2011-12-13.csv
Pv12.121	Cowichan Bay	48.7562	-123.6223	4	7	2012	Harbour seal	CLUPAL	Clupea_pallasii	Pacific_Herring	1447	NA	1.0000	100.00	UBC	Thomas	dna_new_BC_2011-12-13.csv
Pv12.122	Cowichan Bay	48.7562	-123.6223	4	7	2012	Harbour seal	BERMAG	Berryteuthis_magister	Magister_Armhook_Squid	25	NA	0.0141	1.41	UBC	Thomas	dna_new_BC_2011-12-13.csv
Pv12.122	Cowichan Bay	48.7562	-123.6223	4	7	2012	Harbour seal	CLUPAL	Clupea_pallasii	Pacific_Herring	1293	NA	0.7301	73.01	UBC	Thomas	dna_new_BC_2011-12-13.csv
Pv12.122	Cowichan Bay	48.7562	-123.6223	4	7	2012	Harbour seal	MERPRO	Merluccius_productus	Pacific_Hake	453	NA	0.2558	25.58	UBC	Thomas	dna_new_BC_2011-12-13.csv
Pv12.123	Cowichan Bay	48.7562	-123.6223	4	7	2012	Harbour seal	CLUPAL	Clupea_pallasii	Pacific_Herring	533	NA	0.6688	66.88	UBC	Thomas	dna_new_BC_2011-12-13.csv
Pv12.123	Cowichan Bay	48.7562	-123.6223	4	7	2012	Harbour seal	ONCKIS	Oncorhynchus_kisutch	Coho_Salmon	NA	1183	0.0646	6.46	UBC	Thomas	dna_new_BC_2011-12-13.csv
Pv12.123	Cowichan Bay	48.7562	-123.6223	4	7	2012	Harbour seal	ONCNER	Oncorhynchus_nerka	Sockeye_Salmon	NA	66	0.0036	0.36	UBC	Thomas	dna_new_BC_2011-12-13.csv
Pv12.123	Cowichan Bay	48.7562	-123.6223	4	7	2012	Harbour seal	ONCTSH	Oncorhynchus_tshawytscha	Chinook_Salmon	264	4816	0.2630	26.30	UBC	Thomas	dna_new_BC_2011-12-13.csv
Pv12.124	Cowichan Bay	48.7562	-123.6223	4	7	2012	Harbour seal	CLUPAL	Clupea_pallasii	Pacific_Herring	442	NA	0.5243	52.43	UBC	Thomas	dna_new_BC_2011-12-13.csv
Pv12.124	Cowichan Bay	48.7562	-123.6223	4	7	2012	Harbour seal	GADMAC	Gadus_macrocephalus	Pacific_Cod	81	NA	0.0961	9.61	UBC	Thomas	dna_new_BC_2011-12-13.csv
Pv12.124	Cowichan Bay	48.7562	-123.6223	4	7	2012	Harbour seal	HYDCOL	Hydrolagus_colliei	Spotted_Ratfish	320	NA	0.3796	37.96	UBC	Thomas	dna_new_BC_2011-12-13.csv
Pv12.125	Cowichan Bay	48.7562	-123.6223	4	7	2012	Harbour seal	CLUPAL	Clupea_pallasii	Pacific_Herring	242	NA	0.9308	93.08	UBC	Thomas	dna_new_BC_2011-12-13.csv
Pv12.125	Cowichan Bay	48.7562	-123.6223	4	7	2012	Harbour seal	ONCNER	Oncorhynchus_nerka	Sockeye_Salmon	6	NA	0.0231	2.31	UBC	Thomas	dna_new_BC_2011-12-13.csv
Pv12.125	Cowichan Bay	48.7562	-123.6223	4	7	2012	Harbour seal	ONCTSH	Oncorhynchus_tshawytscha	Chinook_Salmon	9	NA	0.0346	3.46	UBC	Thomas	dna_new_BC_2011-12-13.csv
Pv12.125	Cowichan Bay	48.7562	-123.6223	4	7	2012	Harbour seal	GADCHA	Gadus_chalcogrammus	Walleye_Pollock	3	NA	0.0115	1.15	UBC	Thomas	dna_new_BC_2011-12-13.csv
Pv12.126	Cowichan Bay	48.7562	-123.6223	4	7	2012	Harbour seal	CLUPAL	Clupea_pallasii	Pacific_Herring	1066	NA	0.9042	90.42	UBC	Thomas	dna_new_BC_2011-12-13.csv
Pv12.126	Cowichan Bay	48.7562	-123.6223	4	7	2012	Harbour seal	MERPRO	Merluccius_productus	Pacific_Hake	113	NA	0.0958	9.58	UBC	Thomas	dna_new_BC_2011-12-13.csv
Pv12.127	Cowichan Bay	48.7562	-123.6223	4	7	2012	Harbour seal	CLUPAL	Clupea_pallasii	Pacific_Herring	1491	NA	1.0000	100.00	UBC	Thomas	dna_new_BC_2011-12-13.csv
Pv12.128	Belle Chain	48.8323	-123.1984	5	7	2012	Harbour seal	GADCHA	Gadus_chalcogrammus	Walleye_Pollock	1	NA	0.0345	3.45	UBC	Thomas	dna_new_BC_2011-12-13.csv
Pv12.128	Belle Chain	48.8323	-123.1984	5	7	2012	Harbour seal	CLUPAL	Clupea_pallasii	Pacific_Herring	11	NA	0.3793	37.93	UBC	Thomas	dna_new_BC_2011-12-13.csv
Pv12.128	Belle Chain	48.8323	-123.1984	5	7	2012	Harbour seal	GADMAC	Gadus_macrocephalus	Pacific_Cod	1	NA	0.0345	3.45	UBC	Thomas	dna_new_BC_2011-12-13.csv
Pv12.128	Belle Chain	48.8323	-123.1984	5	7	2012	Harbour seal	GASACU	Gasterosteus_aculeatus	Threespine_Stickleback	1	NA	0.0345	3.45	UBC	Thomas	dna_new_BC_2011-12-13.csv
Pv12.128	Belle Chain	48.8323	-123.1984	5	7	2012	Harbour seal	LYCPAC	Lycodes_pacificus	Blackbelly_Eelpout	1	NA	0.0345	3.45	UBC	Thomas	dna_new_BC_2011-12-13.csv
Pv12.128	Belle Chain	48.8323	-123.1984	5	7	2012	Harbour seal	ONCKIS	Oncorhynchus_kisutch	Coho_Salmon	2	1335	0.1656	16.56	UBC	Thomas	dna_new_BC_2011-12-13.csv
Pv12.128	Belle Chain	48.8323	-123.1984	5	7	2012	Harbour seal	ONCNER	Oncorhynchus_nerka	Sockeye_Salmon	5	33	0.0041	0.41	UBC	Thomas	dna_new_BC_2011-12-13.csv
Pv12.128	Belle Chain	48.8323	-123.1984	5	7	2012	Harbour seal	ONCTSH	Oncorhynchus_tshawytscha	Chinook_Salmon	4	1690	0.2096	20.96	UBC	Thomas	dna_new_BC_2011-12-13.csv
Pv12.128	Belle Chain	48.8323	-123.1984	5	7	2012	Harbour seal	OPHELO	Ophiodon_elongatus	Lingcod	1	NA	0.0345	3.45	UBC	Thomas	dna_new_BC_2011-12-13.csv
Pv12.128	Belle Chain	48.8323	-123.1984	5	7	2012	Harbour seal	NA	Lepidopsetta_bilineata_OR_ Platichthys_stellatus	Rock_Sole_OR_Starry_Flounder	1	NA	0.0345	3.45	UBC	Thomas	dna_new_BC_2011-12-13.csv
Pv12.128	Belle Chain	48.8323	-123.1984	5	7	2012	Harbour seal	ALOSAP	Alosa_sapidissima	American_Shad	1	NA	0.0345	3.45	UBC	Thomas	dna_new_BC_2011-12-13.csv
Pv12.129	Belle Chain	48.8323	-123.1984	5	7	2012	Harbour seal	GADCHA	Gadus_chalcogrammus	Walleye_Pollock	6	NA	0.0261	2.61	UBC	Thomas	dna_new_BC_2011-12-13.csv
Pv12.129	Belle Chain	48.8323	-123.1984	5	7	2012	Harbour seal	CLUPAL	Clupea_pallasii	Pacific_Herring	8	NA	0.0348	3.48	UBC	Thomas	dna_new_BC_2011-12-13.csv
Pv12.129	Belle Chain	48.8323	-123.1984	5	7	2012	Harbour seal	MERPRO	Merluccius_productus	Pacific_Hake	3	NA	0.0130	1.30	UBC	Thomas	dna_new_BC_2011-12-13.csv
Pv12.129	Belle Chain	48.8323	-123.1984	5	7	2012	Harbour seal	ONCGOR	Oncorhynchus_gorbuscha	Pink_Salmon	NA	3	0.0217	2.17	UBC	Thomas	dna_new_BC_2011-12-13.csv
Pv12.129	Belle Chain	48.8323	-123.1984	5	7	2012	Harbour seal	HYDCOL	Hydrolagus_colliei	Spotted_Ratfish	200	NA	0.8696	86.96	UBC	Thomas	dna_new_BC_2011-12-13.csv
Pv12.129	Belle Chain	48.8323	-123.1984	5	7	2012	Harbour seal	LYCPAC	Lycodes_pacificus	Blackbelly_Eelpout	3	NA	0.0130	1.30	UBC	Thomas	dna_new_BC_2011-12-13.csv
Pv12.129	Belle Chain	48.8323	-123.1984	5	7	2012	Harbour seal	ONCNER	Oncorhynchus_nerka	Sockeye_Salmon	NA	3	0.0217	2.17	UBC	Thomas	dna_new_BC_2011-12-13.csv
Pv12.130	Belle Chain	48.8323	-123.1984	5	7	2012	Harbour seal	ALOSAP	Alosa_sapidissima	American_Shad	501	NA	0.1492	14.92	UBC	Thomas	dna_new_BC_2011-12-13.csv
Pv12.130	Belle Chain	48.8323	-123.1984	5	7	2012	Harbour seal	CLUPAL	Clupea_pallasii	Pacific_Herring	61	NA	0.0182	1.82	UBC	Thomas	dna_new_BC_2011-12-13.csv
Pv12.130	Belle Chain	48.8323	-123.1984	5	7	2012	Harbour seal	ONCNER	Oncorhynchus_nerka	Sockeye_Salmon	136	1466	0.0563	5.63	UBC	Thomas	dna_new_BC_2011-12-13.csv
Pv12.130	Belle Chain	48.8323	-123.1984	5	7	2012	Harbour seal	ONCTSH	Oncorhynchus_tshawytscha	Chinook_Salmon	2661	20206	0.7764	77.64	UBC	Thomas	dna_new_BC_2011-12-13.csv
Pv12.131	Comox	49.6016	-124.8904	15	7	2012	Harbour seal	OPHELO	Ophiodon_elongatus	Lingcod	637	NA	0.9876	98.76	UBC	Thomas	dna_new_BC_2011-12-13.csv
Pv12.131	Comox	49.6016	-124.8904	15	7	2012	Harbour seal	CLUPAL	Clupea_pallasii	Pacific_Herring	8	NA	0.0124	1.24	UBC	Thomas	dna_new_BC_2011-12-13.csv
Pv12.132	Comox	49.6016	-124.8904	15	7	2012	Harbour seal	CLUPAL	Clupea_pallasii	Pacific_Herring	435	NA	0.2069	20.69	UBC	Thomas	dna_new_BC_2011-12-13.csv
Pv12.132	Comox	49.6016	-124.8904	15	7	2012	Harbour seal	GASACU	Gasterosteus_aculeatus	Threespine_Stickleback	28	NA	0.0133	1.33	UBC	Thomas	dna_new_BC_2011-12-13.csv
Pv12.132	Comox	49.6016	-124.8904	15	7	2012	Harbour seal	ONCKIS	Oncorhynchus_kisutch	Coho_Salmon	774	NA	0.3682	36.82	UBC	Thomas	dna_new_BC_2011-12-13.csv
Pv12.132	Comox	49.6016	-124.8904	15	7	2012	Harbour seal	ONCTSH	Oncorhynchus_tshawytscha	Chinook_Salmon	865	NA	0.4115	41.15	UBC	Thomas	dna_new_BC_2011-12-13.csv
Pv12.133	Comox	49.6016	-124.8904	15	7	2012	Harbour seal	GADCHA	Gadus_chalcogrammus	Walleye_Pollock	1198	NA	1.0000	100.00	UBC	Thomas	dna_new_BC_2011-12-13.csv
Pv12.134	Comox	49.6016	-124.8904	15	7	2012	Harbour seal	HEXDEC	Hexagrammos_decagrammus	Kelp_Greenling	203	NA	0.2762	27.62	UBC	Thomas	dna_new_BC_2011-12-13.csv
Pv12.134	Comox	49.6016	-124.8904	15	7	2012	Harbour seal	HEXSTE	Hexagrammos_stelleri	Whitespotted_Greenling	532	NA	0.7238	72.38	UBC	Thomas	dna_new_BC_2011-12-13.csv
Pv12.135	Comox	49.6016	-124.8904	15	7	2012	Harbour seal	ONCNER	Oncorhynchus_nerka	Sockeye_Salmon	NA	156	0.0112	1.12	UBC	Thomas	dna_new_BC_2011-12-13.csv
Pv12.135	Comox	49.6016	-124.8904	15	7	2012	Harbour seal	ONCTSH	Oncorhynchus_tshawytscha	Chinook_Salmon	NA	275	0.0197	1.97	UBC	Thomas	dna_new_BC_2011-12-13.csv
Pv12.135	Comox	49.6016	-124.8904	15	7	2012	Harbour seal	CLUPAL	Clupea_pallasii	Pacific_Herring	21	NA	0.0108	1.08	UBC	Thomas	dna_new_BC_2011-12-13.csv
Pv12.135	Comox	49.6016	-124.8904	15	7	2012	Harbour seal	ONCKIS	Oncorhynchus_kisutch	Coho_Salmon	1920	13377	0.9583	95.83	UBC	Thomas	dna_new_BC_2011-12-13.csv
Pv12.136	Comox	49.6016	-124.8904	15	7	2012	Harbour seal	LOLOPA	Loligo_opalescens	California_Market_Squid	1148	NA	0.9333	93.33	UBC	Thomas	dna_new_BC_2011-12-13.csv
Pv12.136	Comox	49.6016	-124.8904	15	7	2012	Harbour seal	ONCNER	Oncorhynchus_nerka	Sockeye_Salmon	13	NA	0.0106	1.06	UBC	Thomas	dna_new_BC_2011-12-13.csv
Pv12.136	Comox	49.6016	-124.8904	15	7	2012	Harbour seal	ONCTSH	Oncorhynchus_tshawytscha	Chinook_Salmon	15	NA	0.0122	1.22	UBC	Thomas	dna_new_BC_2011-12-13.csv
Pv12.136	Comox	49.6016	-124.8904	15	7	2012	Harbour seal	AMMHEX	Ammodytes_hexapterus	Pacific_Sand_Lance	32	NA	0.0260	2.60	UBC	Thomas	dna_new_BC_2011-12-13.csv
Pv12.136	Comox	49.6016	-124.8904	15	7	2012	Harbour seal	CLUPAL	Clupea_pallasii	Pacific_Herring	22	NA	0.0179	1.79	UBC	Thomas	dna_new_BC_2011-12-13.csv
Pv12.137	Comox	49.6016	-124.8904	15	7	2012	Harbour seal	GADCHA	Gadus_chalcogrammus	Walleye_Pollock	3758	NA	1.0000	100.00	UBC	Thomas	dna_new_BC_2011-12-13.csv
Pv12.138	Comox	49.6016	-124.8904	15	7	2012	Harbour seal	CLUPAL	Clupea_pallasii	Pacific_Herring	4392	NA	1.0000	100.00	UBC	Thomas	dna_new_BC_2011-12-13.csv
Pv12.139	Comox	49.6016	-124.8904	15	7	2012	Harbour seal	MERPRO	Merluccius_productus	Pacific_Hake	7987	NA	1.0000	100.00	UBC	Thomas	dna_new_BC_2011-12-13.csv
Pv12.140	Comox	49.6016	-124.8904	15	7	2012	Harbour seal	ONCGOR	Oncorhynchus_gorbuscha	Pink_Salmon	NA	1	0.0140	1.40	UBC	Thomas	dna_new_BC_2011-12-13.csv
Pv12.140	Comox	49.6016	-124.8904	15	7	2012	Harbour seal	HIPROB	Hippoglossoides_elassodon	Flathead_sole	1	NA	0.0175	1.75	UBC	Thomas	dna_new_BC_2011-12-13.csv
Pv12.140	Comox	49.6016	-124.8904	15	7	2012	Harbour seal	LEPARM	Leptocottus_armatus	Pacific_Staghorn_Sculpin	3	NA	0.0526	5.26	UBC	Thomas	dna_new_BC_2011-12-13.csv
Pv12.140	Comox	49.6016	-124.8904	15	7	2012	Harbour seal	MERPRO	Merluccius_productus	Pacific_Hake	7	NA	0.1228	12.28	UBC	Thomas	dna_new_BC_2011-12-13.csv
Pv12.140	Comox	49.6016	-124.8904	15	7	2012	Harbour seal	GASACU	Gasterosteus_aculeatus	Threespine_Stickleback	1	NA	0.0175	1.75	UBC	Thomas	dna_new_BC_2011-12-13.csv
Pv12.140	Comox	49.6016	-124.8904	15	7	2012	Harbour seal	CLUPAL	Clupea_pallasii	Pacific_Herring	16	NA	0.2807	28.07	UBC	Thomas	dna_new_BC_2011-12-13.csv
Pv12.140	Comox	49.6016	-124.8904	15	7	2012	Harbour seal	LEUSCH	Leuroglossus_schmidti	Northern_Smoothtongue	1	NA	0.0175	1.75	UBC	Thomas	dna_new_BC_2011-12-13.csv
Pv12.140	Comox	49.6016	-124.8904	15	7	2012	Harbour seal	ONCKIS	Oncorhynchus_kisutch	Coho_Salmon	3	1	0.0140	1.40	UBC	Thomas	dna_new_BC_2011-12-13.csv
Pv12.140	Comox	49.6016	-124.8904	15	7	2012	Harbour seal	ONCMYK	Oncorhynchus_mykiss	Steelhead	NA	1	0.0140	1.40	UBC	Thomas	dna_new_BC_2011-12-13.csv
Pv12.140	Comox	49.6016	-124.8904	15	7	2012	Harbour seal	ONCNER	Oncorhynchus_nerka	Sockeye_Salmon	6	7	0.0982	9.82	UBC	Thomas	dna_new_BC_2011-12-13.csv
Pv12.140	Comox	49.6016	-124.8904	15	7	2012	Harbour seal	ONCTSH	Oncorhynchus_tshawytscha	Chinook_Salmon	7	10	0.1404	14.04	UBC	Thomas	dna_new_BC_2011-12-13.csv
Pv12.140	Comox	49.6016	-124.8904	15	7	2012	Harbour seal	OPHELO	Ophiodon_elongatus	Lingcod	3	NA	0.0526	5.26	UBC	Thomas	dna_new_BC_2011-12-13.csv
Pv12.140	Comox	49.6016	-124.8904	15	7	2012	Harbour seal	NA	Lepidopsetta_bilineata_OR_ Platichthys_stellatus	Rock_Sole_OR_Starry_Flounder	2	NA	0.0351	3.51	UBC	Thomas	dna_new_BC_2011-12-13.csv
Pv12.140	Comox	49.6016	-124.8904	15	7	2012	Harbour seal	PORNOT	Porichthys_notatus	Plainfin_Midshipman	1	NA	0.0175	1.75	UBC	Thomas	dna_new_BC_2011-12-13.csv
Pv12.140	Comox	49.6016	-124.8904	15	7	2012	Harbour seal	GADCHA	Gadus_chalcogrammus	Walleye_Pollock	6	NA	0.1053	10.53	UBC	Thomas	dna_new_BC_2011-12-13.csv
Pv12.141	Comox	49.6016	-124.8904	15	7	2012	Harbour seal	OPHELO	Ophiodon_elongatus	Lingcod	4420	NA	1.0000	100.00	UBC	Thomas	dna_new_BC_2011-12-13.csv
Pv12.142	Comox	49.6016	-124.8904	15	7	2012	Harbour seal	CLUPAL	Clupea_pallasii	Pacific_Herring	13	NA	0.0399	3.99	UBC	Thomas	dna_new_BC_2011-12-13.csv
Pv12.142	Comox	49.6016	-124.8904	15	7	2012	Harbour seal	GASACU	Gasterosteus_aculeatus	Threespine_Stickleback	6	NA	0.0184	1.84	UBC	Thomas	dna_new_BC_2011-12-13.csv
Pv12.142	Comox	49.6016	-124.8904	15	7	2012	Harbour seal	LUMSAG	Lumpenus_sagitta	Snake_Prickleback	288	NA	0.8834	88.34	UBC	Thomas	dna_new_BC_2011-12-13.csv
Pv12.142	Comox	49.6016	-124.8904	15	7	2012	Harbour seal	ONCGOR	Oncorhynchus_gorbuscha	Pink_Salmon	NA	1409	0.0561	5.61	UBC	Thomas	dna_new_BC_2011-12-13.csv
Pv12.142	Comox	49.6016	-124.8904	15	7	2012	Harbour seal	ONCNER	Oncorhynchus_nerka	Sockeye_Salmon	5	24	0.0010	0.10	UBC	Thomas	dna_new_BC_2011-12-13.csv
Pv12.142	Comox	49.6016	-124.8904	15	7	2012	Harbour seal	ONCTSH	Oncorhynchus_tshawytscha	Chinook_Salmon	7	30	0.0012	0.12	UBC	Thomas	dna_new_BC_2011-12-13.csv
Pv12.143	Comox	49.6016	-124.8904	15	7	2012	Harbour seal	LOLOPA	Loligo_opalescens	California_Market_Squid	1979	NA	1.0000	100.00	UBC	Thomas	dna_new_BC_2011-12-13.csv
Pv12.144	Comox	49.6016	-124.8904	15	7	2012	Harbour seal	HIPROB	Hippoglossoides_elassodon	Flathead_sole	369	NA	0.2050	20.50	UBC	Thomas	dna_new_BC_2011-12-13.csv
Pv12.144	Comox	49.6016	-124.8904	15	7	2012	Harbour seal	LEPARM	Leptocottus_armatus	Pacific_Staghorn_Sculpin	319	NA	0.1772	17.72	UBC	Thomas	dna_new_BC_2011-12-13.csv
Pv12.144	Comox	49.6016	-124.8904	15	7	2012	Harbour seal	ONCGOR	Oncorhynchus_gorbuscha	Pink_Salmon	NA	5	0.0127	1.27	UBC	Thomas	dna_new_BC_2011-12-13.csv
Pv12.144	Comox	49.6016	-124.8904	15	7	2012	Harbour seal	ONCKIS	Oncorhynchus_kisutch	Coho_Salmon	NA	8	0.0203	2.03	UBC	Thomas	dna_new_BC_2011-12-13.csv
Pv12.144	Comox	49.6016	-124.8904	15	7	2012	Harbour seal	ONCNER	Oncorhynchus_nerka	Sockeye_Salmon	391	56	0.1418	14.18	UBC	Thomas	dna_new_BC_2011-12-13.csv
Pv12.144	Comox	49.6016	-124.8904	15	7	2012	Harbour seal	ONCTSH	Oncorhynchus_tshawytscha	Chinook_Salmon	NA	35	0.0886	8.86	UBC	Thomas	dna_new_BC_2011-12-13.csv
Pv12.144	Comox	49.6016	-124.8904	15	7	2012	Harbour seal	NA	Lepidopsetta_bilineata_OR_ Platichthys_stellatus	Rock_Sole_OR_Starry_Flounder	457	NA	0.2539	25.39	UBC	Thomas	dna_new_BC_2011-12-13.csv
Pv12.144	Comox	49.6016	-124.8904	15	7	2012	Harbour seal	GADCHA	Gadus_chalcogrammus	Walleye_Pollock	181	NA	0.1006	10.06	UBC	Thomas	dna_new_BC_2011-12-13.csv
Pv12.145	Comox	49.6016	-124.8904	15	7	2012	Harbour seal	CLUPAL	Clupea_pallasii	Pacific_Herring	659	NA	0.9734	97.34	UBC	Thomas	dna_new_BC_2011-12-13.csv
Pv12.145	Comox	49.6016	-124.8904	15	7	2012	Harbour seal	ONCGOR	Oncorhynchus_gorbuscha	Pink_Salmon	NA	2	0.0004	0.04	UBC	Thomas	dna_new_BC_2011-12-13.csv
Pv12.145	Comox	49.6016	-124.8904	15	7	2012	Harbour seal	ONCKIS	Oncorhynchus_kisutch	Coho_Salmon	NA	15	0.0027	0.27	UBC	Thomas	dna_new_BC_2011-12-13.csv
Pv12.145	Comox	49.6016	-124.8904	15	7	2012	Harbour seal	ONCMYK	Oncorhynchus_mykiss	Steelhead	NA	6	0.0011	0.11	UBC	Thomas	dna_new_BC_2011-12-13.csv
Pv12.145	Comox	49.6016	-124.8904	15	7	2012	Harbour seal	ONCNER	Oncorhynchus_nerka	Sockeye_Salmon	NA	25	0.0044	0.44	UBC	Thomas	dna_new_BC_2011-12-13.csv
Pv12.145	Comox	49.6016	-124.8904	15	7	2012	Harbour seal	ONCTSH	Oncorhynchus_tshawytscha	Chinook_Salmon	10	35	0.0062	0.62	UBC	Thomas	dna_new_BC_2011-12-13.csv
Pv12.145	Comox	49.6016	-124.8904	15	7	2012	Harbour seal	GADCHA	Gadus_chalcogrammus	Walleye_Pollock	8	NA	0.0118	1.18	UBC	Thomas	dna_new_BC_2011-12-13.csv
Pv12.146	Comox	49.6016	-124.8904	15	7	2012	Harbour seal	LEPARM	Leptocottus_armatus	Pacific_Staghorn_Sculpin	141	NA	0.0415	4.15	UBC	Thomas	dna_new_BC_2011-12-13.csv
Pv12.146	Comox	49.6016	-124.8904	15	7	2012	Harbour seal	LYCPAC	Lycodes_pacificus	Blackbelly_Eelpout	3254	NA	0.9585	95.85	UBC	Thomas	dna_new_BC_2011-12-13.csv
Pv12.147	Comox	49.6016	-124.8904	15	7	2012	Harbour seal	CLUPAL	Clupea_pallasii	Pacific_Herring	333	NA	0.2340	23.40	UBC	Thomas	dna_new_BC_2011-12-13.csv
Pv12.147	Comox	49.6016	-124.8904	15	7	2012	Harbour seal	METMAG	Metacarcinus_magister	Dungeness_Crab	41	NA	0.0288	2.88	UBC	Thomas	dna_new_BC_2011-12-13.csv
Pv12.147	Comox	49.6016	-124.8904	15	7	2012	Harbour seal	ONCGOR	Oncorhynchus_gorbuscha	Pink_Salmon	422	6001	0.1744	17.44	UBC	Thomas	dna_new_BC_2011-12-13.csv
Pv12.147	Comox	49.6016	-124.8904	15	7	2012	Harbour seal	ONCNER	Oncorhynchus_nerka	Sockeye_Salmon	15	303	0.0088	0.88	UBC	Thomas	dna_new_BC_2011-12-13.csv
Pv12.147	Comox	49.6016	-124.8904	15	7	2012	Harbour seal	ONCTSH	Oncorhynchus_tshawytscha	Chinook_Salmon	612	19055	0.5539	55.39	UBC	Thomas	dna_new_BC_2011-12-13.csv
Pv12.148	Comox	49.6016	-124.8904	15	7	2012	Harbour seal	AMMHEX	Ammodytes_hexapterus	Pacific_Sand_Lance	1	NA	0.0303	3.03	UBC	Thomas	dna_new_BC_2011-12-13.csv
Pv12.148	Comox	49.6016	-124.8904	15	7	2012	Harbour seal	CLUPAL	Clupea_pallasii	Pacific_Herring	10	NA	0.3030	30.30	UBC	Thomas	dna_new_BC_2011-12-13.csv
Pv12.148	Comox	49.6016	-124.8904	15	7	2012	Harbour seal	GADMAC	Gadus_macrocephalus	Pacific_Cod	2	NA	0.0606	6.06	UBC	Thomas	dna_new_BC_2011-12-13.csv
Pv12.148	Comox	49.6016	-124.8904	15	7	2012	Harbour seal	GASACU	Gasterosteus_aculeatus	Threespine_Stickleback	1	NA	0.0303	3.03	UBC	Thomas	dna_new_BC_2011-12-13.csv
Pv12.148	Comox	49.6016	-124.8904	15	7	2012	Harbour seal	LEPARM	Leptocottus_armatus	Pacific_Staghorn_Sculpin	3	NA	0.0909	9.09	UBC	Thomas	dna_new_BC_2011-12-13.csv
Pv12.148	Comox	49.6016	-124.8904	15	7	2012	Harbour seal	LEUSCH	Leuroglossus_schmidti	Northern_Smoothtongue	1	NA	0.0303	3.03	UBC	Thomas	dna_new_BC_2011-12-13.csv
Pv12.148	Comox	49.6016	-124.8904	15	7	2012	Harbour seal	MERPRO	Merluccius_productus	Pacific_Hake	1	NA	0.0303	3.03	UBC	Thomas	dna_new_BC_2011-12-13.csv
Pv12.148	Comox	49.6016	-124.8904	15	7	2012	Harbour seal	ONCGOR	Oncorhynchus_gorbuscha	Pink_Salmon	1	NA	0.0303	3.03	UBC	Thomas	dna_new_BC_2011-12-13.csv
Pv12.148	Comox	49.6016	-124.8904	15	7	2012	Harbour seal	ONCKIS	Oncorhynchus_kisutch	Coho_Salmon	1	NA	0.0303	3.03	UBC	Thomas	dna_new_BC_2011-12-13.csv
Pv12.148	Comox	49.6016	-124.8904	15	7	2012	Harbour seal	ONCNER	Oncorhynchus_nerka	Sockeye_Salmon	2	NA	0.0606	6.06	UBC	Thomas	dna_new_BC_2011-12-13.csv
Pv12.148	Comox	49.6016	-124.8904	15	7	2012	Harbour seal	ONCTSH	Oncorhynchus_tshawytscha	Chinook_Salmon	5	NA	0.1515	15.15	UBC	Thomas	dna_new_BC_2011-12-13.csv
Pv12.148	Comox	49.6016	-124.8904	15	7	2012	Harbour seal	PARVET	Parophrys_vetulus	English_Sole	1	NA	0.0303	3.03	UBC	Thomas	dna_new_BC_2011-12-13.csv
Pv12.148	Comox	49.6016	-124.8904	15	7	2012	Harbour seal	NA	Lepidopsetta_bilineata_OR_ Platichthys_stellatus	Rock_Sole_OR_Starry_Flounder	1	NA	0.0303	3.03	UBC	Thomas	dna_new_BC_2011-12-13.csv
Pv12.148	Comox	49.6016	-124.8904	15	7	2012	Harbour seal	GADCHA	Gadus_chalcogrammus	Walleye_Pollock	3	NA	0.0909	9.09	UBC	Thomas	dna_new_BC_2011-12-13.csv
Pv12.149	Comox	49.6016	-124.8904	15	7	2012	Harbour seal	CLUPAL	Clupea_pallasii	Pacific_Herring	19	NA	0.0461	4.61	UBC	Thomas	dna_new_BC_2011-12-13.csv
Pv12.149	Comox	49.6016	-124.8904	15	7	2012	Harbour seal	MERPRO	Merluccius_productus	Pacific_Hake	356	NA	0.8641	86.41	UBC	Thomas	dna_new_BC_2011-12-13.csv
Pv12.149	Comox	49.6016	-124.8904	15	7	2012	Harbour seal	ONCGOR	Oncorhynchus_gorbuscha	Pink_Salmon	NA	1058	0.0722	7.22	UBC	Thomas	dna_new_BC_2011-12-13.csv
Pv12.149	Comox	49.6016	-124.8904	15	7	2012	Harbour seal	ONCNER	Oncorhynchus_nerka	Sockeye_Salmon	15	18	0.0012	0.12	UBC	Thomas	dna_new_BC_2011-12-13.csv
Pv12.149	Comox	49.6016	-124.8904	15	7	2012	Harbour seal	ONCTSH	Oncorhynchus_tshawytscha	Chinook_Salmon	11	27	0.0018	0.18	UBC	Thomas	dna_new_BC_2011-12-13.csv
Pv12.149	Comox	49.6016	-124.8904	15	7	2012	Harbour seal	GADCHA	Gadus_chalcogrammus	Walleye_Pollock	6	NA	0.0146	1.46	UBC	Thomas	dna_new_BC_2011-12-13.csv
Pv12.150	Comox	49.6016	-124.8904	15	7	2012	Harbour seal	ONCTSH	Oncorhynchus_tshawytscha	Chinook_Salmon	9	NA	0.0481	4.81	UBC	Thomas	dna_new_BC_2011-12-13.csv
Pv12.150	Comox	49.6016	-124.8904	15	7	2012	Harbour seal	ONCNER	Oncorhynchus_nerka	Sockeye_Salmon	5	NA	0.0267	2.67	UBC	Thomas	dna_new_BC_2011-12-13.csv
Pv12.150	Comox	49.6016	-124.8904	15	7	2012	Harbour seal	GADCHA	Gadus_chalcogrammus	Walleye_Pollock	8	NA	0.0428	4.28	UBC	Thomas	dna_new_BC_2011-12-13.csv
Pv12.150	Comox	49.6016	-124.8904	15	7	2012	Harbour seal	ALOSAP	Alosa_sapidissima	American_Shad	2	NA	0.0107	1.07	UBC	Thomas	dna_new_BC_2011-12-13.csv
Pv12.150	Comox	49.6016	-124.8904	15	7	2012	Harbour seal	CLUPAL	Clupea_pallasii	Pacific_Herring	18	NA	0.0963	9.63	UBC	Thomas	dna_new_BC_2011-12-13.csv
Pv12.150	Comox	49.6016	-124.8904	15	7	2012	Harbour seal	GASACU	Gasterosteus_aculeatus	Threespine_Stickleback	2	NA	0.0107	1.07	UBC	Thomas	dna_new_BC_2011-12-13.csv
Pv12.150	Comox	49.6016	-124.8904	15	7	2012	Harbour seal	MERPRO	Merluccius_productus	Pacific_Hake	143	NA	0.7647	76.47	UBC	Thomas	dna_new_BC_2011-12-13.csv
Pv12.151	Comox	49.6016	-124.8904	15	7	2012	Harbour seal	ONCNER	Oncorhynchus_nerka	Sockeye_Salmon	NA	323	0.0113	1.13	UBC	Thomas	dna_new_BC_2011-12-13.csv
Pv12.151	Comox	49.6016	-124.8904	15	7	2012	Harbour seal	ONCTSH	Oncorhynchus_tshawytscha	Chinook_Salmon	7328	28305	0.9887	98.87	UBC	Thomas	dna_new_BC_2011-12-13.csv
Pv12.152	Comox	49.6016	-124.8904	15	7	2012	Harbour seal	ONCGOR	Oncorhynchus_gorbuscha	Pink_Salmon	NA	5	0.0032	0.32	UBC	Thomas	dna_new_BC_2011-12-13.csv
Pv12.152	Comox	49.6016	-124.8904	15	7	2012	Harbour seal	CLUPAL	Clupea_pallasii	Pacific_Herring	146	NA	0.7725	77.25	UBC	Thomas	dna_new_BC_2011-12-13.csv
Pv12.152	Comox	49.6016	-124.8904	15	7	2012	Harbour seal	GADMAC	Gadus_macrocephalus	Pacific_Cod	3	NA	0.0159	1.59	UBC	Thomas	dna_new_BC_2011-12-13.csv
Pv12.152	Comox	49.6016	-124.8904	15	7	2012	Harbour seal	GASACU	Gasterosteus_aculeatus	Threespine_Stickleback	5	NA	0.0265	2.65	UBC	Thomas	dna_new_BC_2011-12-13.csv
Pv12.152	Comox	49.6016	-124.8904	15	7	2012	Harbour seal	LAMAYR	Lampetra_ayresii	River_Lamprey	2	NA	0.0106	1.06	UBC	Thomas	dna_new_BC_2011-12-13.csv
Pv12.152	Comox	49.6016	-124.8904	15	7	2012	Harbour seal	LUMSAG	Lumpenus_sagitta	Snake_Prickleback	3	NA	0.0159	1.59	UBC	Thomas	dna_new_BC_2011-12-13.csv
Pv12.152	Comox	49.6016	-124.8904	15	7	2012	Harbour seal	MERPRO	Merluccius_productus	Pacific_Hake	4	NA	0.0212	2.12	UBC	Thomas	dna_new_BC_2011-12-13.csv
Pv12.152	Comox	49.6016	-124.8904	15	7	2012	Harbour seal	ONCKIS	Oncorhynchus_kisutch	Coho_Salmon	NA	23	0.0148	1.48	UBC	Thomas	dna_new_BC_2011-12-13.csv
Pv12.152	Comox	49.6016	-124.8904	15	7	2012	Harbour seal	ONCMYK	Oncorhynchus_mykiss	Steelhead	NA	2	0.0013	0.13	UBC	Thomas	dna_new_BC_2011-12-13.csv
Pv12.152	Comox	49.6016	-124.8904	15	7	2012	Harbour seal	ONCNER	Oncorhynchus_nerka	Sockeye_Salmon	6	37	0.0239	2.39	UBC	Thomas	dna_new_BC_2011-12-13.csv
Pv12.152	Comox	49.6016	-124.8904	15	7	2012	Harbour seal	ONCTSH	Oncorhynchus_tshawytscha	Chinook_Salmon	9	54	0.0348	3.48	UBC	Thomas	dna_new_BC_2011-12-13.csv
Pv12.152	Comox	49.6016	-124.8904	15	7	2012	Harbour seal	OPHELO	Ophiodon_elongatus	Lingcod	2	NA	0.0106	1.06	UBC	Thomas	dna_new_BC_2011-12-13.csv
Pv12.152	Comox	49.6016	-124.8904	15	7	2012	Harbour seal	GADCHA	Gadus_chalcogrammus	Walleye_Pollock	6	NA	0.0317	3.17	UBC	Thomas	dna_new_BC_2011-12-13.csv
Pv12.152	Comox	49.6016	-124.8904	15	7	2012	Harbour seal	PSYPAR	Psychrolutes_paradoxus	Tadpole_Sculpin	3	NA	0.0159	1.59	UBC	Thomas	dna_new_BC_2011-12-13.csv
Pv12.152	Comox	49.6016	-124.8904	15	7	2012	Harbour seal	SALMAL	Salvelinus_malma	Dolly_Varden	NA	2	0.0013	0.13	UBC	Thomas	dna_new_BC_2011-12-13.csv
Pv12.153	Comox	49.6016	-124.8904	15	7	2012	Harbour seal	CLUPAL	Clupea_pallasii	Pacific_Herring	19	NA	0.1210	12.10	UBC	Thomas	dna_new_BC_2011-12-13.csv
Pv12.153	Comox	49.6016	-124.8904	15	7	2012	Harbour seal	ENTDOF	Enteroctopus_dofleini	Giant_Pacific_Octopus	75	NA	0.4777	47.77	UBC	Thomas	dna_new_BC_2011-12-13.csv
Pv12.153	Comox	49.6016	-124.8904	15	7	2012	Harbour seal	GADMAC	Gadus_macrocephalus	Pacific_Cod	2	NA	0.0127	1.27	UBC	Thomas	dna_new_BC_2011-12-13.csv
Pv12.153	Comox	49.6016	-124.8904	15	7	2012	Harbour seal	GASACU	Gasterosteus_aculeatus	Threespine_Stickleback	4	NA	0.0255	2.55	UBC	Thomas	dna_new_BC_2011-12-13.csv
Pv12.153	Comox	49.6016	-124.8904	15	7	2012	Harbour seal	LYCPAC	Lycodes_pacificus	Blackbelly_Eelpout	2	NA	0.0127	1.27	UBC	Thomas	dna_new_BC_2011-12-13.csv
Pv12.153	Comox	49.6016	-124.8904	15	7	2012	Harbour seal	MERPRO	Merluccius_productus	Pacific_Hake	12	NA	0.0764	7.64	UBC	Thomas	dna_new_BC_2011-12-13.csv
Pv12.153	Comox	49.6016	-124.8904	15	7	2012	Harbour seal	ONCKIS	Oncorhynchus_kisutch	Coho_Salmon	7	NA	0.0446	4.46	UBC	Thomas	dna_new_BC_2011-12-13.csv
Pv12.153	Comox	49.6016	-124.8904	15	7	2012	Harbour seal	ONCNER	Oncorhynchus_nerka	Sockeye_Salmon	14	NA	0.0892	8.92	UBC	Thomas	dna_new_BC_2011-12-13.csv
Pv12.153	Comox	49.6016	-124.8904	15	7	2012	Harbour seal	ONCTSH	Oncorhynchus_tshawytscha	Chinook_Salmon	7	NA	0.0446	4.46	UBC	Thomas	dna_new_BC_2011-12-13.csv
Pv12.153	Comox	49.6016	-124.8904	15	7	2012	Harbour seal	OPHELO	Ophiodon_elongatus	Lingcod	2	NA	0.0127	1.27	UBC	Thomas	dna_new_BC_2011-12-13.csv
Pv12.153	Comox	49.6016	-124.8904	15	7	2012	Harbour seal	PORNOT	Porichthys_notatus	Plainfin_Midshipman	2	NA	0.0127	1.27	UBC	Thomas	dna_new_BC_2011-12-13.csv
Pv12.153	Comox	49.6016	-124.8904	15	7	2012	Harbour seal	GADCHA	Gadus_chalcogrammus	Walleye_Pollock	11	NA	0.0701	7.01	UBC	Thomas	dna_new_BC_2011-12-13.csv
Pv12.154	Comox	49.6016	-124.8904	15	7	2012	Harbour seal	CLUPAL	Clupea_pallasii	Pacific_Herring	972	NA	0.3293	32.93	UBC	Thomas	dna_new_BC_2011-12-13.csv
Pv12.154	Comox	49.6016	-124.8904	15	7	2012	Harbour seal	ONCNER	Oncorhynchus_nerka	Sockeye_Salmon	NA	183	0.0080	0.80	UBC	Thomas	dna_new_BC_2011-12-13.csv
Pv12.154	Comox	49.6016	-124.8904	15	7	2012	Harbour seal	ONCTSH	Oncorhynchus_tshawytscha	Chinook_Salmon	1980	15195	0.6627	66.27	UBC	Thomas	dna_new_BC_2011-12-13.csv
Pv12.155	Comox	49.6016	-124.8904	15	7	2012	Harbour seal	CLUPAL	Clupea_pallasii	Pacific_Herring	452	NA	0.9206	92.06	UBC	Thomas	dna_new_BC_2011-12-13.csv
Pv12.155	Comox	49.6016	-124.8904	15	7	2012	Harbour seal	MERPRO	Merluccius_productus	Pacific_Hake	7	NA	0.0143	1.43	UBC	Thomas	dna_new_BC_2011-12-13.csv
Pv12.155	Comox	49.6016	-124.8904	15	7	2012	Harbour seal	ONCGOR	Oncorhynchus_gorbuscha	Pink_Salmon	NA	5	0.0017	0.17	UBC	Thomas	dna_new_BC_2011-12-13.csv
Pv12.155	Comox	49.6016	-124.8904	15	7	2012	Harbour seal	ONCKIS	Oncorhynchus_kisutch	Coho_Salmon	NA	22	0.0075	0.75	UBC	Thomas	dna_new_BC_2011-12-13.csv
Pv12.155	Comox	49.6016	-124.8904	15	7	2012	Harbour seal	ONCMYK	Oncorhynchus_mykiss	Steelhead	NA	3	0.0010	0.10	UBC	Thomas	dna_new_BC_2011-12-13.csv
Pv12.155	Comox	49.6016	-124.8904	15	7	2012	Harbour seal	ONCNER	Oncorhynchus_nerka	Sockeye_Salmon	14	35	0.0120	1.20	UBC	Thomas	dna_new_BC_2011-12-13.csv
Pv12.155	Comox	49.6016	-124.8904	15	7	2012	Harbour seal	ONCTSH	Oncorhynchus_tshawytscha	Chinook_Salmon	9	72	0.0246	2.46	UBC	Thomas	dna_new_BC_2011-12-13.csv
Pv12.155	Comox	49.6016	-124.8904	15	7	2012	Harbour seal	GADCHA	Gadus_chalcogrammus	Walleye_Pollock	9	NA	0.0183	1.83	UBC	Thomas	dna_new_BC_2011-12-13.csv
Pv12.156	Comox	49.6016	-124.8904	15	7	2012	Harbour seal	ONCNER	Oncorhynchus_nerka	Sockeye_Salmon	98	97	0.0028	0.28	UBC	Thomas	dna_new_BC_2011-12-13.csv
Pv12.156	Comox	49.6016	-124.8904	15	7	2012	Harbour seal	ONCTSH	Oncorhynchus_tshawytscha	Chinook_Salmon	NA	167	0.0048	0.48	UBC	Thomas	dna_new_BC_2011-12-13.csv
Pv12.156	Comox	49.6016	-124.8904	15	7	2012	Harbour seal	CLUPAL	Clupea_pallasii	Pacific_Herring	1849	NA	0.9002	90.02	UBC	Thomas	dna_new_BC_2011-12-13.csv
Pv12.156	Comox	49.6016	-124.8904	15	7	2012	Harbour seal	ONCGOR	Oncorhynchus_gorbuscha	Pink_Salmon	107	3145	0.0906	9.06	UBC	Thomas	dna_new_BC_2011-12-13.csv
Pv12.156	Comox	49.6016	-124.8904	15	7	2012	Harbour seal	ONCKIS	Oncorhynchus_kisutch	Coho_Salmon	NA	55	0.0016	0.16	UBC	Thomas	dna_new_BC_2011-12-13.csv
Pv12.157	Comox	49.6016	-124.8904	15	7	2012	Harbour seal	NA	Lepidopsetta_bilineata_OR_ Platichthys_stellatus	Rock_Sole_OR_Starry_Flounder	4	NA	0.0121	1.21	UBC	Thomas	dna_new_BC_2011-12-13.csv
Pv12.157	Comox	49.6016	-124.8904	15	7	2012	Harbour seal	LAMAYR	Lampetra_ayresii	River_Lamprey	159	NA	0.4818	48.18	UBC	Thomas	dna_new_BC_2011-12-13.csv
Pv12.157	Comox	49.6016	-124.8904	15	7	2012	Harbour seal	MERPRO	Merluccius_productus	Pacific_Hake	4	NA	0.0121	1.21	UBC	Thomas	dna_new_BC_2011-12-13.csv
Pv12.157	Comox	49.6016	-124.8904	15	7	2012	Harbour seal	MICPRO	Microgadus_proximus	Pacific_Tomcod	32	NA	0.0970	9.70	UBC	Thomas	dna_new_BC_2011-12-13.csv
Pv12.157	Comox	49.6016	-124.8904	15	7	2012	Harbour seal	ONCTSH	Oncorhynchus_tshawytscha	Chinook_Salmon	5	3433	0.0152	1.52	UBC	Thomas	dna_new_BC_2011-12-13.csv
Pv12.157	Comox	49.6016	-124.8904	15	7	2012	Harbour seal	CLUPAL	Clupea_pallasii	Pacific_Herring	126	NA	0.3818	38.18	UBC	Thomas	dna_new_BC_2011-12-13.csv
Pv12.158	Comox	49.6016	-124.8904	15	7	2012	Harbour seal	CLUPAL	Clupea_pallasii	Pacific_Herring	306	NA	0.9162	91.62	UBC	Thomas	dna_new_BC_2011-12-13.csv
Pv12.158	Comox	49.6016	-124.8904	15	7	2012	Harbour seal	LEPARM	Leptocottus_armatus	Pacific_Staghorn_Sculpin	5	NA	0.0150	1.50	UBC	Thomas	dna_new_BC_2011-12-13.csv
Pv12.158	Comox	49.6016	-124.8904	15	7	2012	Harbour seal	GASACU	Gasterosteus_aculeatus	Threespine_Stickleback	4	NA	0.0120	1.20	UBC	Thomas	dna_new_BC_2011-12-13.csv
Pv12.158	Comox	49.6016	-124.8904	15	7	2012	Harbour seal	ONCGOR	Oncorhynchus_gorbuscha	Pink_Salmon	NA	7	0.0014	0.14	UBC	Thomas	dna_new_BC_2011-12-13.csv
Pv12.158	Comox	49.6016	-124.8904	15	7	2012	Harbour seal	ONCKIS	Oncorhynchus_kisutch	Coho_Salmon	NA	29	0.0057	0.57	UBC	Thomas	dna_new_BC_2011-12-13.csv
Pv12.158	Comox	49.6016	-124.8904	15	7	2012	Harbour seal	ONCMYK	Oncorhynchus_mykiss	Steelhead	NA	3	0.0006	0.06	UBC	Thomas	dna_new_BC_2011-12-13.csv
Pv12.158	Comox	49.6016	-124.8904	15	7	2012	Harbour seal	ONCNER	Oncorhynchus_nerka	Sockeye_Salmon	5	43	0.0084	0.84	UBC	Thomas	dna_new_BC_2011-12-13.csv
Pv12.158	Comox	49.6016	-124.8904	15	7	2012	Harbour seal	ONCTSH	Oncorhynchus_tshawytscha	Chinook_Salmon	6	86	0.0169	1.69	UBC	Thomas	dna_new_BC_2011-12-13.csv
Pv12.158	Comox	49.6016	-124.8904	15	7	2012	Harbour seal	GADCHA	Gadus_chalcogrammus	Walleye_Pollock	8	NA	0.0240	2.40	UBC	Thomas	dna_new_BC_2011-12-13.csv
Pv12.159	Comox	49.6016	-124.8904	15	7	2012	Harbour seal	CLUPAL	Clupea_pallasii	Pacific_Herring	14	NA	0.0158	1.58	UBC	Thomas	dna_new_BC_2011-12-13.csv
Pv12.159	Comox	49.6016	-124.8904	15	7	2012	Harbour seal	MERPRO	Merluccius_productus	Pacific_Hake	542	NA	0.6117	61.17	UBC	Thomas	dna_new_BC_2011-12-13.csv
Pv12.159	Comox	49.6016	-124.8904	15	7	2012	Harbour seal	ONCNER	Oncorhynchus_nerka	Sockeye_Salmon	319	NA	0.3600	36.00	UBC	Thomas	dna_new_BC_2011-12-13.csv
Pv12.159	Comox	49.6016	-124.8904	15	7	2012	Harbour seal	ONCTSH	Oncorhynchus_tshawytscha	Chinook_Salmon	11	NA	0.0124	1.24	UBC	Thomas	dna_new_BC_2011-12-13.csv
Pv12.160	Comox	49.6016	-124.8904	15	7	2012	Harbour seal	ONCNER	Oncorhynchus_nerka	Sockeye_Salmon	NA	343	0.0131	1.31	UBC	Thomas	dna_new_BC_2011-12-13.csv
Pv12.160	Comox	49.6016	-124.8904	15	7	2012	Harbour seal	ONCTSH	Oncorhynchus_tshawytscha	Chinook_Salmon	1878	25795	0.9869	98.69	UBC	Thomas	dna_new_BC_2011-12-13.csv
Pv12.161	Comox	49.6016	-124.8904	15	7	2012	Harbour seal	CLUPAL	Clupea_pallasii	Pacific_Herring	112	NA	0.0847	8.47	UBC	Thomas	dna_new_BC_2011-12-13.csv
Pv12.161	Comox	49.6016	-124.8904	15	7	2012	Harbour seal	MICPRO	Microgadus_proximus	Pacific_Tomcod	122	NA	0.0923	9.23	UBC	Thomas	dna_new_BC_2011-12-13.csv
Pv12.161	Comox	49.6016	-124.8904	15	7	2012	Harbour seal	GADCHA	Gadus_chalcogrammus	Walleye_Pollock	1088	NA	0.8230	82.30	UBC	Thomas	dna_new_BC_2011-12-13.csv
Pv12.162	Comox	49.6016	-124.8904	15	7	2012	Harbour seal	CLUPAL	Clupea_pallasii	Pacific_Herring	93	NA	0.0295	2.95	UBC	Thomas	dna_new_BC_2011-12-13.csv
Pv12.162	Comox	49.6016	-124.8904	15	7	2012	Harbour seal	ONCKIS	Oncorhynchus_kisutch	Coho_Salmon	2543	19498	0.9351	93.51	UBC	Thomas	dna_new_BC_2011-12-13.csv
Pv12.162	Comox	49.6016	-124.8904	15	7	2012	Harbour seal	ONCTSH	Oncorhynchus_tshawytscha	Chinook_Salmon	521	739	0.0354	3.54	UBC	Thomas	dna_new_BC_2011-12-13.csv
Pv12.163	Comox	49.6016	-124.8904	15	7	2012	Harbour seal	GADMAC	Gadus_macrocephalus	Pacific_Cod	3902	NA	0.7106	71.06	UBC	Thomas	dna_new_BC_2011-12-13.csv
Pv12.163	Comox	49.6016	-124.8904	15	7	2012	Harbour seal	GADCHA	Gadus_chalcogrammus	Walleye_Pollock	1589	NA	0.2894	28.94	UBC	Thomas	dna_new_BC_2011-12-13.csv
Pv12.164	Comox	49.6016	-124.8904	15	7	2012	Harbour seal	PARVET	Parophrys_vetulus	English_Sole	224	NA	0.4902	49.02	UBC	Thomas	dna_new_BC_2011-12-13.csv
Pv12.164	Comox	49.6016	-124.8904	15	7	2012	Harbour seal	NA	Lepidopsetta_bilineata_OR_ Platichthys_stellatus	Rock_Sole_OR_Starry_Flounder	209	NA	0.4573	45.73	UBC	Thomas	dna_new_BC_2011-12-13.csv
Pv12.164	Comox	49.6016	-124.8904	15	7	2012	Harbour seal	ONCTSH	Oncorhynchus_tshawytscha	Chinook_Salmon	5	NA	0.0109	1.09	UBC	Thomas	dna_new_BC_2011-12-13.csv
Pv12.164	Comox	49.6016	-124.8904	15	7	2012	Harbour seal	CLUPAL	Clupea_pallasii	Pacific_Herring	9	NA	0.0197	1.97	UBC	Thomas	dna_new_BC_2011-12-13.csv
Pv12.164	Comox	49.6016	-124.8904	15	7	2012	Harbour seal	MERPRO	Merluccius_productus	Pacific_Hake	5	NA	0.0109	1.09	UBC	Thomas	dna_new_BC_2011-12-13.csv
Pv12.164	Comox	49.6016	-124.8904	15	7	2012	Harbour seal	ONCNER	Oncorhynchus_nerka	Sockeye_Salmon	5	NA	0.0109	1.09	UBC	Thomas	dna_new_BC_2011-12-13.csv
Pv12.165	Comox	49.6016	-124.8904	15	7	2012	Harbour seal	AMMHEX	Ammodytes_hexapterus	Pacific_Sand_Lance	418	NA	0.4583	45.83	UBC	Thomas	dna_new_BC_2011-12-13.csv
Pv12.165	Comox	49.6016	-124.8904	15	7	2012	Harbour seal	CLUPAL	Clupea_pallasii	Pacific_Herring	494	NA	0.5417	54.17	UBC	Thomas	dna_new_BC_2011-12-13.csv
Pv12.166	Cowichan Bay	48.7562	-123.6223	15	7	2012	Harbour seal	BERMAG	Berryteuthis_magister	Magister_Armhook_Squid	1	NA	0.0185	1.85	UBC	Thomas	dna_new_BC_2011-12-13.csv
Pv12.166	Cowichan Bay	48.7562	-123.6223	15	7	2012	Harbour seal	CLUPAL	Clupea_pallasii	Pacific_Herring	8	NA	0.1481	14.81	UBC	Thomas	dna_new_BC_2011-12-13.csv
Pv12.166	Cowichan Bay	48.7562	-123.6223	15	7	2012	Harbour seal	GASACU	Gasterosteus_aculeatus	Threespine_Stickleback	3	NA	0.0556	5.56	UBC	Thomas	dna_new_BC_2011-12-13.csv
Pv12.166	Cowichan Bay	48.7562	-123.6223	15	7	2012	Harbour seal	LEPARM	Leptocottus_armatus	Pacific_Staghorn_Sculpin	1	NA	0.0185	1.85	UBC	Thomas	dna_new_BC_2011-12-13.csv
Pv12.166	Cowichan Bay	48.7562	-123.6223	15	7	2012	Harbour seal	HYDCOL	Hydrolagus_colliei	Spotted_Ratfish	32	NA	0.5926	59.26	UBC	Thomas	dna_new_BC_2011-12-13.csv
Pv12.166	Cowichan Bay	48.7562	-123.6223	15	7	2012	Harbour seal	MERPRO	Merluccius_productus	Pacific_Hake	2	NA	0.0370	3.70	UBC	Thomas	dna_new_BC_2011-12-13.csv
Pv12.166	Cowichan Bay	48.7562	-123.6223	15	7	2012	Harbour seal	ONCNER	Oncorhynchus_nerka	Sockeye_Salmon	2	NA	0.0370	3.70	UBC	Thomas	dna_new_BC_2011-12-13.csv
Pv12.166	Cowichan Bay	48.7562	-123.6223	15	7	2012	Harbour seal	ONCTSH	Oncorhynchus_tshawytscha	Chinook_Salmon	2	NA	0.0370	3.70	UBC	Thomas	dna_new_BC_2011-12-13.csv
Pv12.166	Cowichan Bay	48.7562	-123.6223	15	7	2012	Harbour seal	PSYPAR	Psychrolutes_paradoxus	Tadpole_Sculpin	1	NA	0.0185	1.85	UBC	Thomas	dna_new_BC_2011-12-13.csv
Pv12.166	Cowichan Bay	48.7562	-123.6223	15	7	2012	Harbour seal	GADCHA	Gadus_chalcogrammus	Walleye_Pollock	2	NA	0.0370	3.70	UBC	Thomas	dna_new_BC_2011-12-13.csv
Pv12.167	Cowichan Bay	48.7562	-123.6223	15	7	2012	Harbour seal	PORNOT	Porichthys_notatus	Plainfin_Midshipman	1	NA	0.0370	3.70	UBC	Thomas	dna_new_BC_2011-12-13.csv
Pv12.167	Cowichan Bay	48.7562	-123.6223	15	7	2012	Harbour seal	GADCHA	Gadus_chalcogrammus	Walleye_Pollock	1	NA	0.0370	3.70	UBC	Thomas	dna_new_BC_2011-12-13.csv
Pv12.167	Cowichan Bay	48.7562	-123.6223	15	7	2012	Harbour seal	ONCNER	Oncorhynchus_nerka	Sockeye_Salmon	4	NA	0.1481	14.81	UBC	Thomas	dna_new_BC_2011-12-13.csv
Pv12.167	Cowichan Bay	48.7562	-123.6223	15	7	2012	Harbour seal	ONCTSH	Oncorhynchus_tshawytscha	Chinook_Salmon	1	NA	0.0370	3.70	UBC	Thomas	dna_new_BC_2011-12-13.csv
Pv12.167	Cowichan Bay	48.7562	-123.6223	15	7	2012	Harbour seal	OPHELO	Ophiodon_elongatus	Lingcod	2	NA	0.0741	7.41	UBC	Thomas	dna_new_BC_2011-12-13.csv
Pv12.167	Cowichan Bay	48.7562	-123.6223	15	7	2012	Harbour seal	CLUPAL	Clupea_pallasii	Pacific_Herring	11	NA	0.4074	40.74	UBC	Thomas	dna_new_BC_2011-12-13.csv
Pv12.167	Cowichan Bay	48.7562	-123.6223	15	7	2012	Harbour seal	CYMAGG	Cymatogaster_aggregata	Shiner_Surfperch	1	NA	0.0370	3.70	UBC	Thomas	dna_new_BC_2011-12-13.csv
Pv12.167	Cowichan Bay	48.7562	-123.6223	15	7	2012	Harbour seal	LEPARM	Leptocottus_armatus	Pacific_Staghorn_Sculpin	2	NA	0.0741	7.41	UBC	Thomas	dna_new_BC_2011-12-13.csv
Pv12.167	Cowichan Bay	48.7562	-123.6223	15	7	2012	Harbour seal	MERPRO	Merluccius_productus	Pacific_Hake	4	NA	0.1481	14.81	UBC	Thomas	dna_new_BC_2011-12-13.csv
Pv12.168	Cowichan Bay	48.7562	-123.6223	15	7	2012	Harbour seal	NA	Lepidopsetta_bilineata_OR_ Platichthys_stellatus	Rock_Sole_OR_Starry_Flounder	1	NA	0.0500	5.00	UBC	Thomas	dna_new_BC_2011-12-13.csv
Pv12.168	Cowichan Bay	48.7562	-123.6223	15	7	2012	Harbour seal	PORNOT	Porichthys_notatus	Plainfin_Midshipman	1	NA	0.0500	5.00	UBC	Thomas	dna_new_BC_2011-12-13.csv
Pv12.168	Cowichan Bay	48.7562	-123.6223	15	7	2012	Harbour seal	PSYPAR	Psychrolutes_paradoxus	Tadpole_Sculpin	1	NA	0.0500	5.00	UBC	Thomas	dna_new_BC_2011-12-13.csv
Pv12.168	Cowichan Bay	48.7562	-123.6223	15	7	2012	Harbour seal	GADCHA	Gadus_chalcogrammus	Walleye_Pollock	3	NA	0.1500	15.00	UBC	Thomas	dna_new_BC_2011-12-13.csv
Pv12.168	Cowichan Bay	48.7562	-123.6223	15	7	2012	Harbour seal	CLUPAL	Clupea_pallasii	Pacific_Herring	4	NA	0.2000	20.00	UBC	Thomas	dna_new_BC_2011-12-13.csv
Pv12.168	Cowichan Bay	48.7562	-123.6223	15	7	2012	Harbour seal	GASACU	Gasterosteus_aculeatus	Threespine_Stickleback	1	NA	0.0500	5.00	UBC	Thomas	dna_new_BC_2011-12-13.csv
Pv12.168	Cowichan Bay	48.7562	-123.6223	15	7	2012	Harbour seal	MERPRO	Merluccius_productus	Pacific_Hake	1	NA	0.0500	5.00	UBC	Thomas	dna_new_BC_2011-12-13.csv
Pv12.168	Cowichan Bay	48.7562	-123.6223	15	7	2012	Harbour seal	ONCKIS	Oncorhynchus_kisutch	Coho_Salmon	3	NA	0.1500	15.00	UBC	Thomas	dna_new_BC_2011-12-13.csv
Pv12.168	Cowichan Bay	48.7562	-123.6223	15	7	2012	Harbour seal	ONCNER	Oncorhynchus_nerka	Sockeye_Salmon	2	NA	0.1000	10.00	UBC	Thomas	dna_new_BC_2011-12-13.csv
Pv12.168	Cowichan Bay	48.7562	-123.6223	15	7	2012	Harbour seal	ONCTSH	Oncorhynchus_tshawytscha	Chinook_Salmon	1	NA	0.0500	5.00	UBC	Thomas	dna_new_BC_2011-12-13.csv
Pv12.168	Cowichan Bay	48.7562	-123.6223	15	7	2012	Harbour seal	OPHELO	Ophiodon_elongatus	Lingcod	2	NA	0.1000	10.00	UBC	Thomas	dna_new_BC_2011-12-13.csv
Pv12.169	Cowichan Bay	48.7562	-123.6223	15	7	2012	Harbour seal	CYMAGG	Cymatogaster_aggregata	Shiner_Surfperch	1484	NA	0.1556	15.56	UBC	Thomas	dna_new_BC_2011-12-13.csv
Pv12.169	Cowichan Bay	48.7562	-123.6223	15	7	2012	Harbour seal	GASACU	Gasterosteus_aculeatus	Threespine_Stickleback	7759	NA	0.8133	81.33	UBC	Thomas	dna_new_BC_2011-12-13.csv
Pv12.169	Cowichan Bay	48.7562	-123.6223	15	7	2012	Harbour seal	LEPARM	Leptocottus_armatus	Pacific_Staghorn_Sculpin	297	NA	0.0311	3.11	UBC	Thomas	dna_new_BC_2011-12-13.csv
Pv12.170	Cowichan Bay	48.7562	-123.6223	15	7	2012	Harbour seal	CLUPAL	Clupea_pallasii	Pacific_Herring	241	NA	0.3110	31.10	UBC	Thomas	dna_new_BC_2011-12-13.csv
Pv12.170	Cowichan Bay	48.7562	-123.6223	15	7	2012	Harbour seal	ONCGOR	Oncorhynchus_gorbuscha	Pink_Salmon	NA	2	0.0158	1.58	UBC	Thomas	dna_new_BC_2011-12-13.csv
Pv12.170	Cowichan Bay	48.7562	-123.6223	15	7	2012	Harbour seal	ONCKIS	Oncorhynchus_kisutch	Coho_Salmon	NA	14	0.1109	11.09	UBC	Thomas	dna_new_BC_2011-12-13.csv
Pv12.170	Cowichan Bay	48.7562	-123.6223	15	7	2012	Harbour seal	ONCMYK	Oncorhynchus_mykiss	Steelhead	NA	5	0.0396	3.96	UBC	Thomas	dna_new_BC_2011-12-13.csv
Pv12.170	Cowichan Bay	48.7562	-123.6223	15	7	2012	Harbour seal	ONCNER	Oncorhynchus_nerka	Sockeye_Salmon	NA	30	0.2376	23.76	UBC	Thomas	dna_new_BC_2011-12-13.csv
Pv12.170	Cowichan Bay	48.7562	-123.6223	15	7	2012	Harbour seal	ONCTSH	Oncorhynchus_tshawytscha	Chinook_Salmon	534	36	0.2851	28.51	UBC	Thomas	dna_new_BC_2011-12-13.csv
Pv12.171	Cowichan Bay	48.7562	-123.6223	15	7	2012	Harbour seal	CLUPAL	Clupea_pallasii	Pacific_Herring	1163	NA	1.0000	100.00	UBC	Thomas	dna_new_BC_2011-12-13.csv
Pv12.172	Cowichan Bay	48.7562	-123.6223	15	7	2012	Harbour seal	GASACU	Gasterosteus_aculeatus	Threespine_Stickleback	327	NA	0.3222	32.22	UBC	Thomas	dna_new_BC_2011-12-13.csv
Pv12.172	Cowichan Bay	48.7562	-123.6223	15	7	2012	Harbour seal	OCTRUB	Octopus_rubescens	Pacific_Red_Octopus	190	NA	0.1872	18.72	UBC	Thomas	dna_new_BC_2011-12-13.csv
Pv12.172	Cowichan Bay	48.7562	-123.6223	15	7	2012	Harbour seal	CLUPAL	Clupea_pallasii	Pacific_Herring	11	NA	0.0108	1.08	UBC	Thomas	dna_new_BC_2011-12-13.csv
Pv12.172	Cowichan Bay	48.7562	-123.6223	15	7	2012	Harbour seal	LEPARM	Leptocottus_armatus	Pacific_Staghorn_Sculpin	487	NA	0.4798	47.98	UBC	Thomas	dna_new_BC_2011-12-13.csv
Pv12.173	Cowichan Bay	48.7562	-123.6223	15	7	2012	Harbour seal	PSYPAR	Psychrolutes_paradoxus	Tadpole_Sculpin	2	NA	0.0500	5.00	UBC	Thomas	dna_new_BC_2011-12-13.csv
Pv12.173	Cowichan Bay	48.7562	-123.6223	15	7	2012	Harbour seal	GADCHA	Gadus_chalcogrammus	Walleye_Pollock	5	NA	0.1250	12.50	UBC	Thomas	dna_new_BC_2011-12-13.csv
Pv12.173	Cowichan Bay	48.7562	-123.6223	15	7	2012	Harbour seal	ONCNER	Oncorhynchus_nerka	Sockeye_Salmon	4	NA	0.1000	10.00	UBC	Thomas	dna_new_BC_2011-12-13.csv
Pv12.173	Cowichan Bay	48.7562	-123.6223	15	7	2012	Harbour seal	ONCTSH	Oncorhynchus_tshawytscha	Chinook_Salmon	5	NA	0.1250	12.50	UBC	Thomas	dna_new_BC_2011-12-13.csv
Pv12.173	Cowichan Bay	48.7562	-123.6223	15	7	2012	Harbour seal	NA	Lepidopsetta_bilineata_OR_ Platichthys_stellatus	Rock_Sole_OR_Starry_Flounder	1	NA	0.0250	2.50	UBC	Thomas	dna_new_BC_2011-12-13.csv
Pv12.173	Cowichan Bay	48.7562	-123.6223	15	7	2012	Harbour seal	GADMAC	Gadus_macrocephalus	Pacific_Cod	1	NA	0.0250	2.50	UBC	Thomas	dna_new_BC_2011-12-13.csv
Pv12.173	Cowichan Bay	48.7562	-123.6223	15	7	2012	Harbour seal	GASACU	Gasterosteus_aculeatus	Threespine_Stickleback	2	NA	0.0500	5.00	UBC	Thomas	dna_new_BC_2011-12-13.csv
Pv12.173	Cowichan Bay	48.7562	-123.6223	15	7	2012	Harbour seal	LEPARM	Leptocottus_armatus	Pacific_Staghorn_Sculpin	1	NA	0.0250	2.50	UBC	Thomas	dna_new_BC_2011-12-13.csv
Pv12.173	Cowichan Bay	48.7562	-123.6223	15	7	2012	Harbour seal	LOLOPA	Loligo_opalescens	California_Market_Squid	1	NA	0.0250	2.50	UBC	Thomas	dna_new_BC_2011-12-13.csv
Pv12.173	Cowichan Bay	48.7562	-123.6223	15	7	2012	Harbour seal	LYCPAC	Lycodes_pacificus	Blackbelly_Eelpout	1	NA	0.0250	2.50	UBC	Thomas	dna_new_BC_2011-12-13.csv
Pv12.173	Cowichan Bay	48.7562	-123.6223	15	7	2012	Harbour seal	MERPRO	Merluccius_productus	Pacific_Hake	3	NA	0.0750	7.50	UBC	Thomas	dna_new_BC_2011-12-13.csv
Pv12.173	Cowichan Bay	48.7562	-123.6223	15	7	2012	Harbour seal	ONCGOR	Oncorhynchus_gorbuscha	Pink_Salmon	2	NA	0.0500	5.00	UBC	Thomas	dna_new_BC_2011-12-13.csv
Pv12.173	Cowichan Bay	48.7562	-123.6223	15	7	2012	Harbour seal	ONCKIS	Oncorhynchus_kisutch	Coho_Salmon	1	NA	0.0250	2.50	UBC	Thomas	dna_new_BC_2011-12-13.csv
Pv12.173	Cowichan Bay	48.7562	-123.6223	15	7	2012	Harbour seal	AMMHEX	Ammodytes_hexapterus	Pacific_Sand_Lance	1	NA	0.0250	2.50	UBC	Thomas	dna_new_BC_2011-12-13.csv
Pv12.173	Cowichan Bay	48.7562	-123.6223	15	7	2012	Harbour seal	CLUPAL	Clupea_pallasii	Pacific_Herring	9	NA	0.2250	22.50	UBC	Thomas	dna_new_BC_2011-12-13.csv
Pv12.173	Cowichan Bay	48.7562	-123.6223	15	7	2012	Harbour seal	CYMAGG	Cymatogaster_aggregata	Shiner_Surfperch	1	NA	0.0250	2.50	UBC	Thomas	dna_new_BC_2011-12-13.csv
Pv12.174	Cowichan Bay	48.7562	-123.6223	15	7	2012	Harbour seal	CLUPAL	Clupea_pallasii	Pacific_Herring	21	NA	0.0946	9.46	UBC	Thomas	dna_new_BC_2011-12-13.csv
Pv12.174	Cowichan Bay	48.7562	-123.6223	15	7	2012	Harbour seal	CYMAGG	Cymatogaster_aggregata	Shiner_Surfperch	4	NA	0.0180	1.80	UBC	Thomas	dna_new_BC_2011-12-13.csv
Pv12.174	Cowichan Bay	48.7562	-123.6223	15	7	2012	Harbour seal	MERPRO	Merluccius_productus	Pacific_Hake	176	NA	0.7928	79.28	UBC	Thomas	dna_new_BC_2011-12-13.csv
Pv12.174	Cowichan Bay	48.7562	-123.6223	15	7	2012	Harbour seal	ONCNER	Oncorhynchus_nerka	Sockeye_Salmon	5	NA	0.0225	2.25	UBC	Thomas	dna_new_BC_2011-12-13.csv
Pv12.174	Cowichan Bay	48.7562	-123.6223	15	7	2012	Harbour seal	ONCTSH	Oncorhynchus_tshawytscha	Chinook_Salmon	8	NA	0.0360	3.60	UBC	Thomas	dna_new_BC_2011-12-13.csv
Pv12.174	Cowichan Bay	48.7562	-123.6223	15	7	2012	Harbour seal	GADCHA	Gadus_chalcogrammus	Walleye_Pollock	8	NA	0.0360	3.60	UBC	Thomas	dna_new_BC_2011-12-13.csv
Pv12.175	Cowichan Bay	48.7562	-123.6223	15	7	2012	Harbour seal	GADCHA	Gadus_chalcogrammus	Walleye_Pollock	1120	NA	1.0000	100.00	UBC	Thomas	dna_new_BC_2011-12-13.csv
Pv12.176	Cowichan Bay	48.7562	-123.6223	15	7	2012	Harbour seal	MERPRO	Merluccius_productus	Pacific_Hake	613	NA	0.4038	40.38	UBC	Thomas	dna_new_BC_2011-12-13.csv
Pv12.176	Cowichan Bay	48.7562	-123.6223	15	7	2012	Harbour seal	GADCHA	Gadus_chalcogrammus	Walleye_Pollock	905	NA	0.5962	59.62	UBC	Thomas	dna_new_BC_2011-12-13.csv
Pv12.177	Cowichan Bay	48.7562	-123.6223	15	7	2012	Harbour seal	EMBLAT	Embiotoca_lateralis	Striped_Surfperch	164	NA	0.0391	3.91	UBC	Thomas	dna_new_BC_2011-12-13.csv
Pv12.177	Cowichan Bay	48.7562	-123.6223	15	7	2012	Harbour seal	CYMAGG	Cymatogaster_aggregata	Shiner_Surfperch	154	NA	0.0367	3.67	UBC	Thomas	dna_new_BC_2011-12-13.csv
Pv12.177	Cowichan Bay	48.7562	-123.6223	15	7	2012	Harbour seal	CLUPAL	Clupea_pallasii	Pacific_Herring	570	NA	0.1359	13.59	UBC	Thomas	dna_new_BC_2011-12-13.csv
Pv12.177	Cowichan Bay	48.7562	-123.6223	15	7	2012	Harbour seal	LEPARM	Leptocottus_armatus	Pacific_Staghorn_Sculpin	3249	NA	0.7745	77.45	UBC	Thomas	dna_new_BC_2011-12-13.csv
Pv12.177	Cowichan Bay	48.7562	-123.6223	15	7	2012	Harbour seal	PHOORN	Pholis_ornata	Saddleback_Gunnel	58	NA	0.0138	1.38	UBC	Thomas	dna_new_BC_2011-12-13.csv
Pv12.178	Cowichan Bay	48.7562	-123.6223	15	7	2012	Harbour seal	CLUPAL	Clupea_pallasii	Pacific_Herring	782	NA	1.0000	100.00	UBC	Thomas	dna_new_BC_2011-12-13.csv
Pv12.179	Cowichan Bay	48.7562	-123.6223	15	7	2012	Harbour seal	ONCTSH	Oncorhynchus_tshawytscha	Chinook_Salmon	563	9752	0.5749	57.49	UBC	Thomas	dna_new_BC_2011-12-13.csv
Pv12.179	Cowichan Bay	48.7562	-123.6223	15	7	2012	Harbour seal	ONCKIS	Oncorhynchus_kisutch	Coho_Salmon	5914	7210	0.4251	42.51	UBC	Thomas	dna_new_BC_2011-12-13.csv
Pv12.180	Cowichan Bay	48.7562	-123.6223	15	7	2012	Harbour seal	ONCKIS	Oncorhynchus_kisutch	Coho_Salmon	NA	18	0.0535	5.35	UBC	Thomas	dna_new_BC_2011-12-13.csv
Pv12.180	Cowichan Bay	48.7562	-123.6223	15	7	2012	Harbour seal	ONCGOR	Oncorhynchus_gorbuscha	Pink_Salmon	NA	6	0.0178	1.78	UBC	Thomas	dna_new_BC_2011-12-13.csv
Pv12.180	Cowichan Bay	48.7562	-123.6223	15	7	2012	Harbour seal	CLUPAL	Clupea_pallasii	Pacific_Herring	506	NA	0.5260	52.60	UBC	Thomas	dna_new_BC_2011-12-13.csv
Pv12.180	Cowichan Bay	48.7562	-123.6223	15	7	2012	Harbour seal	LEPARM	Leptocottus_armatus	Pacific_Staghorn_Sculpin	153	NA	0.1590	15.90	UBC	Thomas	dna_new_BC_2011-12-13.csv
Pv12.180	Cowichan Bay	48.7562	-123.6223	15	7	2012	Harbour seal	ONCNER	Oncorhynchus_nerka	Sockeye_Salmon	10	29	0.0862	8.62	UBC	Thomas	dna_new_BC_2011-12-13.csv
Pv12.180	Cowichan Bay	48.7562	-123.6223	15	7	2012	Harbour seal	ONCTSH	Oncorhynchus_tshawytscha	Chinook_Salmon	NA	53	0.1575	15.75	UBC	Thomas	dna_new_BC_2011-12-13.csv
Pv12.181	Cowichan Bay	48.7562	-123.6223	15	7	2012	Harbour seal	ONCGOR	Oncorhynchus_gorbuscha	Pink_Salmon	NA	2	0.0069	0.69	UBC	Thomas	dna_new_BC_2011-12-13.csv
Pv12.181	Cowichan Bay	48.7562	-123.6223	15	7	2012	Harbour seal	MERPRO	Merluccius_productus	Pacific_Hake	5	NA	0.0123	1.23	UBC	Thomas	dna_new_BC_2011-12-13.csv
Pv12.181	Cowichan Bay	48.7562	-123.6223	15	7	2012	Harbour seal	CLUPAL	Clupea_pallasii	Pacific_Herring	310	NA	0.7617	76.17	UBC	Thomas	dna_new_BC_2011-12-13.csv
Pv12.181	Cowichan Bay	48.7562	-123.6223	15	7	2012	Harbour seal	GASACU	Gasterosteus_aculeatus	Threespine_Stickleback	5	NA	0.0123	1.23	UBC	Thomas	dna_new_BC_2011-12-13.csv
Pv12.181	Cowichan Bay	48.7562	-123.6223	15	7	2012	Harbour seal	ONCKIS	Oncorhynchus_kisutch	Coho_Salmon	5	5	0.0172	1.72	UBC	Thomas	dna_new_BC_2011-12-13.csv
Pv12.181	Cowichan Bay	48.7562	-123.6223	15	7	2012	Harbour seal	ONCMYK	Oncorhynchus_mykiss	Steelhead	NA	1	0.0034	0.34	UBC	Thomas	dna_new_BC_2011-12-13.csv
Pv12.181	Cowichan Bay	48.7562	-123.6223	15	7	2012	Harbour seal	ONCNER	Oncorhynchus_nerka	Sockeye_Salmon	66	26	0.0892	8.92	UBC	Thomas	dna_new_BC_2011-12-13.csv
Pv12.181	Cowichan Bay	48.7562	-123.6223	15	7	2012	Harbour seal	ONCTSH	Oncorhynchus_tshawytscha	Chinook_Salmon	10	24	0.0824	8.24	UBC	Thomas	dna_new_BC_2011-12-13.csv
Pv12.181	Cowichan Bay	48.7562	-123.6223	15	7	2012	Harbour seal	GADCHA	Gadus_chalcogrammus	Walleye_Pollock	6	NA	0.0147	1.47	UBC	Thomas	dna_new_BC_2011-12-13.csv
Pv12.182	Cowichan Bay	48.7562	-123.6223	15	7	2012	Harbour seal	LEUSCH	Leuroglossus_schmidti	Northern_Smoothtongue	499	NA	0.3117	31.17	UBC	Thomas	dna_new_BC_2011-12-13.csv
Pv12.182	Cowichan Bay	48.7562	-123.6223	15	7	2012	Harbour seal	ONCGOR	Oncorhynchus_gorbuscha	Pink_Salmon	330	64	0.0653	6.53	UBC	Thomas	dna_new_BC_2011-12-13.csv
Pv12.182	Cowichan Bay	48.7562	-123.6223	15	7	2012	Harbour seal	ONCTSH	Oncorhynchus_tshawytscha	Chinook_Salmon	NA	82	0.0837	8.37	UBC	Thomas	dna_new_BC_2011-12-13.csv
Pv12.182	Cowichan Bay	48.7562	-123.6223	15	7	2012	Harbour seal	GADCHA	Gadus_chalcogrammus	Walleye_Pollock	772	NA	0.4822	48.22	UBC	Thomas	dna_new_BC_2011-12-13.csv
Pv12.182	Cowichan Bay	48.7562	-123.6223	15	7	2012	Harbour seal	ONCKIS	Oncorhynchus_kisutch	Coho_Salmon	NA	16	0.0163	1.63	UBC	Thomas	dna_new_BC_2011-12-13.csv
Pv12.182	Cowichan Bay	48.7562	-123.6223	15	7	2012	Harbour seal	ONCNER	Oncorhynchus_nerka	Sockeye_Salmon	NA	40	0.0408	4.08	UBC	Thomas	dna_new_BC_2011-12-13.csv
Pv12.183	Cowichan Bay	48.7562	-123.6223	15	7	2012	Harbour seal	ONCGOR	Oncorhynchus_gorbuscha	Pink_Salmon	NA	816	0.0457	4.57	UBC	Thomas	dna_new_BC_2011-12-13.csv
Pv12.183	Cowichan Bay	48.7562	-123.6223	15	7	2012	Harbour seal	ONCTSH	Oncorhynchus_tshawytscha	Chinook_Salmon	1688	17045	0.9543	95.43	UBC	Thomas	dna_new_BC_2011-12-13.csv
Pv12.184	Cowichan Bay	48.7562	-123.6223	15	7	2012	Harbour seal	BERMAG	Berryteuthis_magister	Magister_Armhook_Squid	14	NA	0.0282	2.82	UBC	Thomas	dna_new_BC_2011-12-13.csv
Pv12.184	Cowichan Bay	48.7562	-123.6223	15	7	2012	Harbour seal	CLUPAL	Clupea_pallasii	Pacific_Herring	7	NA	0.0141	1.41	UBC	Thomas	dna_new_BC_2011-12-13.csv
Pv12.184	Cowichan Bay	48.7562	-123.6223	15	7	2012	Harbour seal	GASACU	Gasterosteus_aculeatus	Threespine_Stickleback	6	NA	0.0121	1.21	UBC	Thomas	dna_new_BC_2011-12-13.csv
Pv12.184	Cowichan Bay	48.7562	-123.6223	15	7	2012	Harbour seal	MERPRO	Merluccius_productus	Pacific_Hake	459	NA	0.9235	92.35	UBC	Thomas	dna_new_BC_2011-12-13.csv
Pv12.184	Cowichan Bay	48.7562	-123.6223	15	7	2012	Harbour seal	ONCGOR	Oncorhynchus_gorbuscha	Pink_Salmon	NA	4	0.0005	0.05	UBC	Thomas	dna_new_BC_2011-12-13.csv
Pv12.184	Cowichan Bay	48.7562	-123.6223	15	7	2012	Harbour seal	ONCKIS	Oncorhynchus_kisutch	Coho_Salmon	NA	23	0.0030	0.30	UBC	Thomas	dna_new_BC_2011-12-13.csv
Pv12.184	Cowichan Bay	48.7562	-123.6223	15	7	2012	Harbour seal	ONCNER	Oncorhynchus_nerka	Sockeye_Salmon	NA	60	0.0078	0.78	UBC	Thomas	dna_new_BC_2011-12-13.csv
Pv12.184	Cowichan Bay	48.7562	-123.6223	15	7	2012	Harbour seal	ONCTSH	Oncorhynchus_tshawytscha	Chinook_Salmon	11	83	0.0108	1.08	UBC	Thomas	dna_new_BC_2011-12-13.csv
Pv12.185	Cowichan Bay	48.7562	-123.6223	15	7	2012	Harbour seal	CLUPAL	Clupea_pallasii	Pacific_Herring	623	NA	0.9750	97.50	UBC	Thomas	dna_new_BC_2011-12-13.csv
Pv12.185	Cowichan Bay	48.7562	-123.6223	15	7	2012	Harbour seal	MERPRO	Merluccius_productus	Pacific_Hake	7	NA	0.0110	1.10	UBC	Thomas	dna_new_BC_2011-12-13.csv
Pv12.185	Cowichan Bay	48.7562	-123.6223	15	7	2012	Harbour seal	ONCGOR	Oncorhynchus_gorbuscha	Pink_Salmon	NA	5	0.0005	0.05	UBC	Thomas	dna_new_BC_2011-12-13.csv
Pv12.185	Cowichan Bay	48.7562	-123.6223	15	7	2012	Harbour seal	ONCKIS	Oncorhynchus_kisutch	Coho_Salmon	NA	24	0.0023	0.23	UBC	Thomas	dna_new_BC_2011-12-13.csv
Pv12.185	Cowichan Bay	48.7562	-123.6223	15	7	2012	Harbour seal	ONCMYK	Oncorhynchus_mykiss	Steelhead	NA	6	0.0006	0.06	UBC	Thomas	dna_new_BC_2011-12-13.csv
Pv12.185	Cowichan Bay	48.7562	-123.6223	15	7	2012	Harbour seal	ONCNER	Oncorhynchus_nerka	Sockeye_Salmon	9	36	0.0035	0.35	UBC	Thomas	dna_new_BC_2011-12-13.csv
Pv12.185	Cowichan Bay	48.7562	-123.6223	15	7	2012	Harbour seal	ONCTSH	Oncorhynchus_tshawytscha	Chinook_Salmon	NA	71	0.0069	0.69	UBC	Thomas	dna_new_BC_2011-12-13.csv
Pv12.185	Cowichan Bay	48.7562	-123.6223	15	7	2012	Harbour seal	SALSAL	Salmo_salar	Atlantic_Salmon	NA	3	0.0003	0.03	UBC	Thomas	dna_new_BC_2011-12-13.csv
Pv12.186	Cowichan Bay	48.7562	-123.6223	25	6	2012	Harbour seal	BERMAG	Berryteuthis_magister	Magister_Armhook_Squid	27	NA	0.0687	6.87	UBC	Thomas	dna_new_BC_2011-12-13.csv
Pv12.186	Cowichan Bay	48.7562	-123.6223	25	6	2012	Harbour seal	CLUPAL	Clupea_pallasii	Pacific_Herring	360	NA	0.9160	91.60	UBC	Thomas	dna_new_BC_2011-12-13.csv
Pv12.186	Cowichan Bay	48.7562	-123.6223	25	6	2012	Harbour seal	MERPRO	Merluccius_productus	Pacific_Hake	6	NA	0.0153	1.53	UBC	Thomas	dna_new_BC_2011-12-13.csv
Pv12.187	Cowichan Bay	48.7562	-123.6223	25	6	2012	Harbour seal	CLUPAL	Clupea_pallasii	Pacific_Herring	950	NA	1.0000	100.00	UBC	Thomas	dna_new_BC_2011-12-13.csv
Pv12.188	Fraser	49.1204	-123.2104	18	7	2012	Harbour seal	ONCTSH	Oncorhynchus_tshawytscha	Chinook_Salmon	16	265	0.0157	1.57	UBC	Thomas	dna_new_BC_2011-12-13.csv
Pv12.188	Fraser	49.1204	-123.2104	18	7	2012	Harbour seal	ONCNER	Oncorhynchus_nerka	Sockeye_Salmon	1443	16566	0.9843	98.43	UBC	Thomas	dna_new_BC_2011-12-13.csv
Pv12.189	Fraser	49.1204	-123.2104	18	7	2012	Harbour seal	ONCNER	Oncorhynchus_nerka	Sockeye_Salmon	1501	20892	0.7521	75.21	UBC	Thomas	dna_new_BC_2011-12-13.csv
Pv12.189	Fraser	49.1204	-123.2104	18	7	2012	Harbour seal	ONCTSH	Oncorhynchus_tshawytscha	Chinook_Salmon	304	6888	0.2479	24.79	UBC	Thomas	dna_new_BC_2011-12-13.csv
Pv12.190	Fraser	49.1204	-123.2104	18	7	2012	Harbour seal	CLUPAL	Clupea_pallasii	Pacific_Herring	8	NA	0.0123	1.23	UBC	Thomas	dna_new_BC_2011-12-13.csv
Pv12.190	Fraser	49.1204	-123.2104	18	7	2012	Harbour seal	ONCNER	Oncorhynchus_nerka	Sockeye_Salmon	637	9559	0.9746	97.46	UBC	Thomas	dna_new_BC_2011-12-13.csv
Pv12.190	Fraser	49.1204	-123.2104	18	7	2012	Harbour seal	ONCTSH	Oncorhynchus_tshawytscha	Chinook_Salmon	8	129	0.0132	1.32	UBC	Thomas	dna_new_BC_2011-12-13.csv
Pv12.191	Fraser	49.1204	-123.2104	18	7	2012	Harbour seal	ONCTSH	Oncorhynchus_tshawytscha	Chinook_Salmon	NA	424	0.0132	1.32	UBC	Thomas	dna_new_BC_2011-12-13.csv
Pv12.191	Fraser	49.1204	-123.2104	18	7	2012	Harbour seal	LAMAYR	Lampetra_ayresii	River_Lamprey	290	NA	0.1064	10.64	UBC	Thomas	dna_new_BC_2011-12-13.csv
Pv12.191	Fraser	49.1204	-123.2104	18	7	2012	Harbour seal	ONCNER	Oncorhynchus_nerka	Sockeye_Salmon	2435	28198	0.8803	88.03	UBC	Thomas	dna_new_BC_2011-12-13.csv
Pv12.192	Fraser	49.1204	-123.2104	18	7	2012	Harbour seal	ONCNER	Oncorhynchus_nerka	Sockeye_Salmon	1419	17231	0.9853	98.53	UBC	Thomas	dna_new_BC_2011-12-13.csv
Pv12.192	Fraser	49.1204	-123.2104	18	7	2012	Harbour seal	ONCTSH	Oncorhynchus_tshawytscha	Chinook_Salmon	NA	257	0.0147	1.47	UBC	Thomas	dna_new_BC_2011-12-13.csv
Pv12.193	Fraser	49.1204	-123.2104	18	7	2012	Harbour seal	ALOSAP	Alosa_sapidissima	American_Shad	3	NA	0.0114	1.14	UBC	Thomas	dna_new_BC_2011-12-13.csv
Pv12.193	Fraser	49.1204	-123.2104	18	7	2012	Harbour seal	CLUPAL	Clupea_pallasii	Pacific_Herring	11	NA	0.0418	4.18	UBC	Thomas	dna_new_BC_2011-12-13.csv
Pv12.193	Fraser	49.1204	-123.2104	18	7	2012	Harbour seal	ENOBIS	Enophrys_bison	Buffalo_Sculpin	3	NA	0.0114	1.14	UBC	Thomas	dna_new_BC_2011-12-13.csv
Pv12.193	Fraser	49.1204	-123.2104	18	7	2012	Harbour seal	ONCNER	Oncorhynchus_nerka	Sockeye_Salmon	205	7453	0.8101	81.01	UBC	Thomas	dna_new_BC_2011-12-13.csv
Pv12.193	Fraser	49.1204	-123.2104	18	7	2012	Harbour seal	ONCTSH	Oncorhynchus_tshawytscha	Chinook_Salmon	8	103	0.0112	1.12	UBC	Thomas	dna_new_BC_2011-12-13.csv
Pv12.193	Fraser	49.1204	-123.2104	18	7	2012	Harbour seal	OPHELO	Ophiodon_elongatus	Lingcod	30	NA	0.1141	11.41	UBC	Thomas	dna_new_BC_2011-12-13.csv
Pv12.194	Fraser	49.1204	-123.2104	18	7	2012	Harbour seal	CLUPAL	Clupea_pallasii	Pacific_Herring	10	NA	0.0676	6.76	UBC	Thomas	dna_new_BC_2011-12-13.csv
Pv12.194	Fraser	49.1204	-123.2104	18	7	2012	Harbour seal	LEPARM	Leptocottus_armatus	Pacific_Staghorn_Sculpin	2	NA	0.0135	1.35	UBC	Thomas	dna_new_BC_2011-12-13.csv
Pv12.194	Fraser	49.1204	-123.2104	18	7	2012	Harbour seal	ONCGOR	Oncorhynchus_gorbuscha	Pink_Salmon	3	NA	0.0203	2.03	UBC	Thomas	dna_new_BC_2011-12-13.csv
Pv12.194	Fraser	49.1204	-123.2104	18	7	2012	Harbour seal	LAMAYR	Lampetra_ayresii	River_Lamprey	2	NA	0.0135	1.35	UBC	Thomas	dna_new_BC_2011-12-13.csv
Pv12.194	Fraser	49.1204	-123.2104	18	7	2012	Harbour seal	LUMSAG	Lumpenus_sagitta	Snake_Prickleback	3	NA	0.0203	2.03	UBC	Thomas	dna_new_BC_2011-12-13.csv
Pv12.194	Fraser	49.1204	-123.2104	18	7	2012	Harbour seal	ONCNER	Oncorhynchus_nerka	Sockeye_Salmon	122	NA	0.8243	82.43	UBC	Thomas	dna_new_BC_2011-12-13.csv
Pv12.194	Fraser	49.1204	-123.2104	18	7	2012	Harbour seal	GADCHA	Gadus_chalcogrammus	Walleye_Pollock	2	NA	0.0135	1.35	UBC	Thomas	dna_new_BC_2011-12-13.csv
Pv12.194	Fraser	49.1204	-123.2104	18	7	2012	Harbour seal	HYDCOL	Hydrolagus_colliei	Spotted_Ratfish	4	NA	0.0270	2.70	UBC	Thomas	dna_new_BC_2011-12-13.csv
Pv12.195	Fraser	49.1204	-123.2104	18	7	2012	Harbour seal	ONCNER	Oncorhynchus_nerka	Sockeye_Salmon	56	495	0.0203	2.03	UBC	Thomas	dna_new_BC_2011-12-13.csv
Pv12.195	Fraser	49.1204	-123.2104	18	7	2012	Harbour seal	ONCTSH	Oncorhynchus_tshawytscha	Chinook_Salmon	841	15152	0.6227	62.27	UBC	Thomas	dna_new_BC_2011-12-13.csv
Pv12.195	Fraser	49.1204	-123.2104	18	7	2012	Harbour seal	COTASP	Cottus_asper	Prickly_Sculpin	99	NA	0.0710	7.10	UBC	Thomas	dna_new_BC_2011-12-13.csv
Pv12.195	Fraser	49.1204	-123.2104	18	7	2012	Harbour seal	HIPSTE	Hippoglossus_stenolepis	Pacific_Halibut	399	NA	0.2860	28.60	UBC	Thomas	dna_new_BC_2011-12-13.csv
Pv12.196	Fraser	49.1204	-123.2104	18	7	2012	Harbour seal	LEPARM	Leptocottus_armatus	Pacific_Staghorn_Sculpin	2	NA	0.0118	1.18	UBC	Thomas	dna_new_BC_2011-12-13.csv
Pv12.196	Fraser	49.1204	-123.2104	18	7	2012	Harbour seal	MERPRO	Merluccius_productus	Pacific_Hake	5	NA	0.0296	2.96	UBC	Thomas	dna_new_BC_2011-12-13.csv
Pv12.196	Fraser	49.1204	-123.2104	18	7	2012	Harbour seal	LAMAYR	Lampetra_ayresii	River_Lamprey	2	NA	0.0118	1.18	UBC	Thomas	dna_new_BC_2011-12-13.csv
Pv12.196	Fraser	49.1204	-123.2104	18	7	2012	Harbour seal	ONCGOR	Oncorhynchus_gorbuscha	Pink_Salmon	6	NA	0.0355	3.55	UBC	Thomas	dna_new_BC_2011-12-13.csv
Pv12.196	Fraser	49.1204	-123.2104	18	7	2012	Harbour seal	ONCNER	Oncorhynchus_nerka	Sockeye_Salmon	30	NA	0.1775	17.75	UBC	Thomas	dna_new_BC_2011-12-13.csv
Pv12.196	Fraser	49.1204	-123.2104	18	7	2012	Harbour seal	CLUPAL	Clupea_pallasii	Pacific_Herring	19	NA	0.1124	11.24	UBC	Thomas	dna_new_BC_2011-12-13.csv
Pv12.196	Fraser	49.1204	-123.2104	18	7	2012	Harbour seal	ENOBIS	Enophrys_bison	Buffalo_Sculpin	2	NA	0.0118	1.18	UBC	Thomas	dna_new_BC_2011-12-13.csv
Pv12.196	Fraser	49.1204	-123.2104	18	7	2012	Harbour seal	HIPSTE	Hippoglossus_stenolepis	Pacific_Halibut	91	NA	0.5385	53.85	UBC	Thomas	dna_new_BC_2011-12-13.csv
Pv12.196	Fraser	49.1204	-123.2104	18	7	2012	Harbour seal	HYDCOL	Hydrolagus_colliei	Spotted_Ratfish	3	NA	0.0178	1.78	UBC	Thomas	dna_new_BC_2011-12-13.csv
Pv12.196	Fraser	49.1204	-123.2104	18	7	2012	Harbour seal	LUMSAG	Lumpenus_sagitta	Snake_Prickleback	3	NA	0.0178	1.78	UBC	Thomas	dna_new_BC_2011-12-13.csv
Pv12.196	Fraser	49.1204	-123.2104	18	7	2012	Harbour seal	GADCHA	Gadus_chalcogrammus	Walleye_Pollock	6	NA	0.0355	3.55	UBC	Thomas	dna_new_BC_2011-12-13.csv
Pv12.197	Fraser	49.1204	-123.2104	18	7	2012	Harbour seal	ONCNER	Oncorhynchus_nerka	Sockeye_Salmon	1129	3345	1.0000	100.00	UBC	Thomas	dna_new_BC_2011-12-13.csv
Pv12.198	Fraser	49.1204	-123.2104	18	7	2012	Harbour seal	ONCNER	Oncorhynchus_nerka	Sockeye_Salmon	2874	11814	1.0000	100.00	UBC	Thomas	dna_new_BC_2011-12-13.csv
Pv12.199	Fraser	49.1204	-123.2104	18	7	2012	Harbour seal	CLUPAL	Clupea_pallasii	Pacific_Herring	115	NA	0.0407	4.07	UBC	Thomas	dna_new_BC_2011-12-13.csv
Pv12.199	Fraser	49.1204	-123.2104	18	7	2012	Harbour seal	ONCNER	Oncorhynchus_nerka	Sockeye_Salmon	2710	7696	0.9593	95.93	UBC	Thomas	dna_new_BC_2011-12-13.csv
Pv12.200	Fraser	49.1204	-123.2104	18	7	2012	Harbour seal	ONCNER	Oncorhynchus_nerka	Sockeye_Salmon	498	6825	0.9337	93.37	UBC	Thomas	dna_new_BC_2011-12-13.csv
Pv12.200	Fraser	49.1204	-123.2104	18	7	2012	Harbour seal	CLUPAL	Clupea_pallasii	Pacific_Herring	20	NA	0.0368	3.68	UBC	Thomas	dna_new_BC_2011-12-13.csv
Pv12.200	Fraser	49.1204	-123.2104	18	7	2012	Harbour seal	HIPSTE	Hippoglossus_stenolepis	Pacific_Halibut	16	NA	0.0295	2.95	UBC	Thomas	dna_new_BC_2011-12-13.csv
Pv12.201	Fraser	49.1204	-123.2104	18	7	2012	Harbour seal	ONCTSH	Oncorhynchus_tshawytscha	Chinook_Salmon	NA	169	0.0120	1.20	UBC	Thomas	dna_new_BC_2011-12-13.csv
Pv12.201	Fraser	49.1204	-123.2104	18	7	2012	Harbour seal	ONCNER	Oncorhynchus_nerka	Sockeye_Salmon	2256	13878	0.9880	98.80	UBC	Thomas	dna_new_BC_2011-12-13.csv
Pv12.202	Fraser	49.1204	-123.2104	18	7	2012	Harbour seal	ONCNER	Oncorhynchus_nerka	Sockeye_Salmon	1466	2681	0.9874	98.74	UBC	Thomas	dna_new_BC_2011-12-13.csv
Pv12.202	Fraser	49.1204	-123.2104	18	7	2012	Harbour seal	CLUPAL	Clupea_pallasii	Pacific_Herring	19	NA	0.0126	1.26	UBC	Thomas	dna_new_BC_2011-12-13.csv
Pv12.204	Fraser	49.1204	-123.2104	18	7	2012	Harbour seal	GASACU	Gasterosteus_aculeatus	Threespine_Stickleback	321	NA	0.0334	3.34	UBC	Thomas	dna_new_BC_2011-12-13.csv
Pv12.204	Fraser	49.1204	-123.2104	18	7	2012	Harbour seal	ONCNER	Oncorhynchus_nerka	Sockeye_Salmon	8683	19810	0.9244	92.44	UBC	Thomas	dna_new_BC_2011-12-13.csv
Pv12.204	Fraser	49.1204	-123.2104	18	7	2012	Harbour seal	GADCHA	Gadus_chalcogrammus	Walleye_Pollock	116	NA	0.0121	1.21	UBC	Thomas	dna_new_BC_2011-12-13.csv
Pv12.204	Fraser	49.1204	-123.2104	18	7	2012	Harbour seal	AMMHEX	Ammodytes_hexapterus	Pacific_Sand_Lance	161	NA	0.0168	1.68	UBC	Thomas	dna_new_BC_2011-12-13.csv
Pv12.204	Fraser	49.1204	-123.2104	18	7	2012	Harbour seal	CLUPAL	Clupea_pallasii	Pacific_Herring	128	NA	0.0133	1.33	UBC	Thomas	dna_new_BC_2011-12-13.csv
Pv12.205	Fraser	49.1204	-123.2104	18	7	2012	Harbour seal	COTASP	Cottus_asper	Prickly_Sculpin	212	NA	0.0812	8.12	UBC	Thomas	dna_new_BC_2011-12-13.csv
Pv12.205	Fraser	49.1204	-123.2104	18	7	2012	Harbour seal	HIPSTE	Hippoglossus_stenolepis	Pacific_Halibut	1324	NA	0.5071	50.71	UBC	Thomas	dna_new_BC_2011-12-13.csv
Pv12.205	Fraser	49.1204	-123.2104	18	7	2012	Harbour seal	ONCNER	Oncorhynchus_nerka	Sockeye_Salmon	34	692	0.0150	1.50	UBC	Thomas	dna_new_BC_2011-12-13.csv
Pv12.205	Fraser	49.1204	-123.2104	18	7	2012	Harbour seal	ONCTSH	Oncorhynchus_tshawytscha	Chinook_Salmon	998	17541	0.3802	38.02	UBC	Thomas	dna_new_BC_2011-12-13.csv
Pv12.205	Fraser	49.1204	-123.2104	18	7	2012	Harbour seal	OPHELO	Ophiodon_elongatus	Lingcod	43	NA	0.0165	1.65	UBC	Thomas	dna_new_BC_2011-12-13.csv
Pv12.206	Fraser	49.1204	-123.2104	18	7	2012	Harbour seal	CLUPAL	Clupea_pallasii	Pacific_Herring	21	NA	0.0188	1.88	UBC	Thomas	dna_new_BC_2011-12-13.csv
Pv12.206	Fraser	49.1204	-123.2104	18	7	2012	Harbour seal	ONCNER	Oncorhynchus_nerka	Sockeye_Salmon	1094	13704	0.9812	98.12	UBC	Thomas	dna_new_BC_2011-12-13.csv
Pv12.207	Fraser	49.1204	-123.2104	18	7	2012	Harbour seal	ALLELO	Allosmerus_elongatus	Whitebait_Smelt	676	NA	0.1447	14.47	UBC	Thomas	dna_new_BC_2011-12-13.csv
Pv12.207	Fraser	49.1204	-123.2104	18	7	2012	Harbour seal	CLUPAL	Clupea_pallasii	Pacific_Herring	398	NA	0.0852	8.52	UBC	Thomas	dna_new_BC_2011-12-13.csv
Pv12.207	Fraser	49.1204	-123.2104	18	7	2012	Harbour seal	HYDCOL	Hydrolagus_colliei	Spotted_Ratfish	482	NA	0.1032	10.32	UBC	Thomas	dna_new_BC_2011-12-13.csv
Pv12.207	Fraser	49.1204	-123.2104	18	7	2012	Harbour seal	LAMAYR	Lampetra_ayresii	River_Lamprey	146	NA	0.0313	3.13	UBC	Thomas	dna_new_BC_2011-12-13.csv
Pv12.207	Fraser	49.1204	-123.2104	18	7	2012	Harbour seal	LOLOPA	Loligo_opalescens	California_Market_Squid	60	NA	0.0128	1.28	UBC	Thomas	dna_new_BC_2011-12-13.csv
Pv12.207	Fraser	49.1204	-123.2104	18	7	2012	Harbour seal	ONCNER	Oncorhynchus_nerka	Sockeye_Salmon	2700	11307	0.6000	60.00	UBC	Thomas	dna_new_BC_2011-12-13.csv
Pv12.207	Fraser	49.1204	-123.2104	18	7	2012	Harbour seal	OPHELO	Ophiodon_elongatus	Lingcod	52	NA	0.0111	1.11	UBC	Thomas	dna_new_BC_2011-12-13.csv
Pv12.207	Fraser	49.1204	-123.2104	18	7	2012	Harbour seal	GADCHA	Gadus_chalcogrammus	Walleye_Pollock	55	NA	0.0118	1.18	UBC	Thomas	dna_new_BC_2011-12-13.csv
Pv12.208	Fraser	49.1204	-123.2104	18	7	2012	Harbour seal	CLUPAL	Clupea_pallasii	Pacific_Herring	499	NA	0.9433	94.33	UBC	Thomas	dna_new_BC_2011-12-13.csv
Pv12.208	Fraser	49.1204	-123.2104	18	7	2012	Harbour seal	ONCGOR	Oncorhynchus_gorbuscha	Pink_Salmon	13	NA	0.0246	2.46	UBC	Thomas	dna_new_BC_2011-12-13.csv
Pv12.208	Fraser	49.1204	-123.2104	18	7	2012	Harbour seal	ONCNER	Oncorhynchus_nerka	Sockeye_Salmon	17	NA	0.0321	3.21	UBC	Thomas	dna_new_BC_2011-12-13.csv
Pv12.209	Fraser	49.1204	-123.2104	18	7	2012	Harbour seal	ONCNER	Oncorhynchus_nerka	Sockeye_Salmon	4092	11205	1.0000	100.00	UBC	Thomas	dna_new_BC_2011-12-13.csv
Pv12.210	Fraser	49.1204	-123.2104	18	7	2012	Harbour seal	ONCNER	Oncorhynchus_nerka	Sockeye_Salmon	3687	12635	1.0000	100.00	UBC	Thomas	dna_new_BC_2011-12-13.csv
Pv12.211	Fraser	49.1204	-123.2104	18	7	2012	Harbour seal	ANAOCE	Anarrhichthys_ocellatus	Wolf_Eel	296	NA	0.0910	9.10	UBC	Thomas	dna_new_BC_2011-12-13.csv
Pv12.211	Fraser	49.1204	-123.2104	18	7	2012	Harbour seal	ONCNER	Oncorhynchus_nerka	Sockeye_Salmon	2958	7381	0.9090	90.90	UBC	Thomas	dna_new_BC_2011-12-13.csv
Pv12.212	Fraser	49.1204	-123.2104	18	7	2012	Harbour seal	AMMHEX	Ammodytes_hexapterus	Pacific_Sand_Lance	5	NA	0.0136	1.36	UBC	Thomas	dna_new_BC_2011-12-13.csv
Pv12.212	Fraser	49.1204	-123.2104	18	7	2012	Harbour seal	ENOBIS	Enophrys_bison	Buffalo_Sculpin	4	NA	0.0108	1.08	UBC	Thomas	dna_new_BC_2011-12-13.csv
Pv12.212	Fraser	49.1204	-123.2104	18	7	2012	Harbour seal	LEPARM	Leptocottus_armatus	Pacific_Staghorn_Sculpin	4	NA	0.0108	1.08	UBC	Thomas	dna_new_BC_2011-12-13.csv
Pv12.212	Fraser	49.1204	-123.2104	18	7	2012	Harbour seal	MERPRO	Merluccius_productus	Pacific_Hake	5	NA	0.0136	1.36	UBC	Thomas	dna_new_BC_2011-12-13.csv
Pv12.212	Fraser	49.1204	-123.2104	18	7	2012	Harbour seal	CLUPAL	Clupea_pallasii	Pacific_Herring	13	NA	0.0352	3.52	UBC	Thomas	dna_new_BC_2011-12-13.csv
Pv12.212	Fraser	49.1204	-123.2104	18	7	2012	Harbour seal	ONCNER	Oncorhynchus_nerka	Sockeye_Salmon	329	2962	0.9160	91.60	UBC	Thomas	dna_new_BC_2011-12-13.csv
Pv12.213	Fraser	49.1204	-123.2104	18	7	2012	Harbour seal	ONCGOR	Oncorhynchus_gorbuscha	Pink_Salmon	NA	476	0.1059	10.59	UBC	Thomas	dna_new_BC_2011-12-13.csv
Pv12.213	Fraser	49.1204	-123.2104	18	7	2012	Harbour seal	ONCNER	Oncorhynchus_nerka	Sockeye_Salmon	3328	4020	0.8941	89.41	UBC	Thomas	dna_new_BC_2011-12-13.csv
Pv12.214	Fraser	49.1204	-123.2104	18	7	2012	Harbour seal	ONCNER	Oncorhynchus_nerka	Sockeye_Salmon	853	677	0.5965	59.65	UBC	Thomas	dna_new_BC_2011-12-13.csv
Pv12.214	Fraser	49.1204	-123.2104	18	7	2012	Harbour seal	ONCTSH	Oncorhynchus_tshawytscha	Chinook_Salmon	151	403	0.3551	35.51	UBC	Thomas	dna_new_BC_2011-12-13.csv
Pv12.214	Fraser	49.1204	-123.2104	18	7	2012	Harbour seal	CLUPAL	Clupea_pallasii	Pacific_Herring	51	NA	0.0483	4.83	UBC	Thomas	dna_new_BC_2011-12-13.csv
Pv12.215	Fraser	49.1204	-123.2104	18	7	2012	Harbour seal	CLUPAL	Clupea_pallasii	Pacific_Herring	24	NA	0.0234	2.34	UBC	Thomas	dna_new_BC_2011-12-13.csv
Pv12.215	Fraser	49.1204	-123.2104	18	7	2012	Harbour seal	ONCNER	Oncorhynchus_nerka	Sockeye_Salmon	991	1814	0.9766	97.66	UBC	Thomas	dna_new_BC_2011-12-13.csv
Pv12.216	Fraser	49.1204	-123.2104	18	7	2012	Harbour seal	LAMAYR	Lampetra_ayresii	River_Lamprey	114	NA	0.0456	4.56	UBC	Thomas	dna_new_BC_2011-12-13.csv
Pv12.216	Fraser	49.1204	-123.2104	18	7	2012	Harbour seal	ONCGOR	Oncorhynchus_gorbuscha	Pink_Salmon	NA	579	0.0707	7.07	UBC	Thomas	dna_new_BC_2011-12-13.csv
Pv12.216	Fraser	49.1204	-123.2104	18	7	2012	Harbour seal	ONCKET	Oncorhynchus_keta	Chum_Salmon	NA	135	0.0165	1.65	UBC	Thomas	dna_new_BC_2011-12-13.csv
Pv12.216	Fraser	49.1204	-123.2104	18	7	2012	Harbour seal	ONCMYK	Oncorhynchus_mykiss	Steelhead	NA	94	0.0115	1.15	UBC	Thomas	dna_new_BC_2011-12-13.csv
Pv12.216	Fraser	49.1204	-123.2104	18	7	2012	Harbour seal	ONCNER	Oncorhynchus_nerka	Sockeye_Salmon	2387	7013	0.8558	85.58	UBC	Thomas	dna_new_BC_2011-12-13.csv
Pv12.217	Fraser	49.1204	-123.2104	18	7	2012	Harbour seal	ONCNER	Oncorhynchus_nerka	Sockeye_Salmon	766	9111	0.9899	98.99	UBC	Thomas	dna_new_BC_2011-12-13.csv
Pv12.217	Fraser	49.1204	-123.2104	18	7	2012	Harbour seal	ONCTSH	Oncorhynchus_tshawytscha	Chinook_Salmon	NA	93	0.0101	1.01	UBC	Thomas	dna_new_BC_2011-12-13.csv
Pv12.218	Fraser	49.1204	-123.2104	18	7	2012	Harbour seal	CLUPAL	Clupea_pallasii	Pacific_Herring	7	NA	0.0136	1.36	UBC	Thomas	dna_new_BC_2011-12-13.csv
Pv12.218	Fraser	49.1204	-123.2104	18	7	2012	Harbour seal	ONCNER	Oncorhynchus_nerka	Sockeye_Salmon	493	1097	0.9864	98.64	UBC	Thomas	dna_new_BC_2011-12-13.csv
Pv12.219	Fraser	49.1204	-123.2104	18	7	2012	Harbour seal	CLUPAL	Clupea_pallasii	Pacific_Herring	33	NA	0.0502	5.02	UBC	Thomas	dna_new_BC_2011-12-13.csv
Pv12.219	Fraser	49.1204	-123.2104	18	7	2012	Harbour seal	ONCGOR	Oncorhynchus_gorbuscha	Pink_Salmon	NA	388	0.0413	4.13	UBC	Thomas	dna_new_BC_2011-12-13.csv
Pv12.219	Fraser	49.1204	-123.2104	18	7	2012	Harbour seal	ONCNER	Oncorhynchus_nerka	Sockeye_Salmon	624	8528	0.9084	90.84	UBC	Thomas	dna_new_BC_2011-12-13.csv
Pv12.220	Belle Chain	48.8323	-123.1984	19	7	2012	Harbour seal	CLUPAL	Clupea_pallasii	Pacific_Herring	2000	NA	0.9896	98.96	UBC	Thomas	dna_new_BC_2011-12-13.csv
Pv12.220	Belle Chain	48.8323	-123.1984	19	7	2012	Harbour seal	ONCGOR	Oncorhynchus_gorbuscha	Pink_Salmon	NA	12	0.0010	0.10	UBC	Thomas	dna_new_BC_2011-12-13.csv
Pv12.220	Belle Chain	48.8323	-123.1984	19	7	2012	Harbour seal	ONCNER	Oncorhynchus_nerka	Sockeye_Salmon	21	79	0.0065	0.65	UBC	Thomas	dna_new_BC_2011-12-13.csv
Pv12.220	Belle Chain	48.8323	-123.1984	19	7	2012	Harbour seal	ONCKET	Oncorhynchus_keta	Chum_Salmon	NA	3	0.0002	0.02	UBC	Thomas	dna_new_BC_2011-12-13.csv
Pv12.220	Belle Chain	48.8323	-123.1984	19	7	2012	Harbour seal	ONCKIS	Oncorhynchus_kisutch	Coho_Salmon	NA	3	0.0002	0.02	UBC	Thomas	dna_new_BC_2011-12-13.csv
Pv12.220	Belle Chain	48.8323	-123.1984	19	7	2012	Harbour seal	ONCMYK	Oncorhynchus_mykiss	Steelhead	NA	2	0.0002	0.02	UBC	Thomas	dna_new_BC_2011-12-13.csv
Pv12.220	Belle Chain	48.8323	-123.1984	19	7	2012	Harbour seal	ONCTSH	Oncorhynchus_tshawytscha	Chinook_Salmon	NA	27	0.0022	0.22	UBC	Thomas	dna_new_BC_2011-12-13.csv
Pv12.221	Belle Chain	48.8323	-123.1984	19	7	2012	Harbour seal	ALOSAP	Alosa_sapidissima	American_Shad	99	NA	0.1840	18.40	UBC	Thomas	dna_new_BC_2011-12-13.csv
Pv12.221	Belle Chain	48.8323	-123.1984	19	7	2012	Harbour seal	CLUPAL	Clupea_pallasii	Pacific_Herring	99	NA	0.1840	18.40	UBC	Thomas	dna_new_BC_2011-12-13.csv
Pv12.221	Belle Chain	48.8323	-123.1984	19	7	2012	Harbour seal	ONCGOR	Oncorhynchus_gorbuscha	Pink_Salmon	NA	333	0.0385	3.85	UBC	Thomas	dna_new_BC_2011-12-13.csv
Pv12.221	Belle Chain	48.8323	-123.1984	19	7	2012	Harbour seal	ONCNER	Oncorhynchus_nerka	Sockeye_Salmon	340	5069	0.5855	58.55	UBC	Thomas	dna_new_BC_2011-12-13.csv
Pv12.221	Belle Chain	48.8323	-123.1984	19	7	2012	Harbour seal	ONCTSH	Oncorhynchus_tshawytscha	Chinook_Salmon	NA	69	0.0080	0.80	UBC	Thomas	dna_new_BC_2011-12-13.csv
Pv12.222	Belle Chain	48.8323	-123.1984	19	7	2012	Harbour seal	CLUPAL	Clupea_pallasii	Pacific_Herring	891	NA	0.7032	70.32	UBC	Thomas	dna_new_BC_2011-12-13.csv
Pv12.222	Belle Chain	48.8323	-123.1984	19	7	2012	Harbour seal	LAMAYR	Lampetra_ayresii	River_Lamprey	376	NA	0.2968	29.68	UBC	Thomas	dna_new_BC_2011-12-13.csv
Pv12.223	Belle Chain	48.8323	-123.1984	19	7	2012	Harbour seal	CLUPAL	Clupea_pallasii	Pacific_Herring	30	NA	0.0363	3.63	UBC	Thomas	dna_new_BC_2011-12-13.csv
Pv12.223	Belle Chain	48.8323	-123.1984	19	7	2012	Harbour seal	ONCGOR	Oncorhynchus_gorbuscha	Pink_Salmon	NA	301	0.0251	2.51	UBC	Thomas	dna_new_BC_2011-12-13.csv
Pv12.223	Belle Chain	48.8323	-123.1984	19	7	2012	Harbour seal	ONCNER	Oncorhynchus_nerka	Sockeye_Salmon	736	10165	0.8490	84.90	UBC	Thomas	dna_new_BC_2011-12-13.csv
Pv12.223	Belle Chain	48.8323	-123.1984	19	7	2012	Harbour seal	ONCTSH	Oncorhynchus_tshawytscha	Chinook_Salmon	60	1072	0.0895	8.95	UBC	Thomas	dna_new_BC_2011-12-13.csv
Pv12.224	Belle Chain	48.8323	-123.1984	19	7	2012	Harbour seal	ONCNER	Oncorhynchus_nerka	Sockeye_Salmon	NA	237	0.0070	0.70	UBC	Thomas	dna_new_BC_2011-12-13.csv
Pv12.224	Belle Chain	48.8323	-123.1984	19	7	2012	Harbour seal	HYDCOL	Hydrolagus_colliei	Spotted_Ratfish	2915	NA	0.8086	80.86	UBC	Thomas	dna_new_BC_2011-12-13.csv
Pv12.224	Belle Chain	48.8323	-123.1984	19	7	2012	Harbour seal	ONCKET	Oncorhynchus_keta	Chum_Salmon	531	5624	0.1657	16.57	UBC	Thomas	dna_new_BC_2011-12-13.csv
Pv12.224	Belle Chain	48.8323	-123.1984	19	7	2012	Harbour seal	ONCTSH	Oncorhynchus_tshawytscha	Chinook_Salmon	159	635	0.0187	1.87	UBC	Thomas	dna_new_BC_2011-12-13.csv
Pv12.225	Belle Chain	48.8323	-123.1984	19	7	2012	Harbour seal	CLUPAL	Clupea_pallasii	Pacific_Herring	93	NA	0.1303	13.03	UBC	Thomas	dna_new_BC_2011-12-13.csv
Pv12.225	Belle Chain	48.8323	-123.1984	19	7	2012	Harbour seal	ONCNER	Oncorhynchus_nerka	Sockeye_Salmon	621	7492	0.8600	86.00	UBC	Thomas	dna_new_BC_2011-12-13.csv
Pv12.225	Belle Chain	48.8323	-123.1984	19	7	2012	Harbour seal	ONCTSH	Oncorhynchus_tshawytscha	Chinook_Salmon	NA	85	0.0098	0.98	UBC	Thomas	dna_new_BC_2011-12-13.csv
Pv12.226	Belle Chain	48.8323	-123.1984	19	7	2012	Harbour seal	ONCNER	Oncorhynchus_nerka	Sockeye_Salmon	2574	13313	0.9880	98.80	UBC	Thomas	dna_new_BC_2011-12-13.csv
Pv12.226	Belle Chain	48.8323	-123.1984	19	7	2012	Harbour seal	ONCTSH	Oncorhynchus_tshawytscha	Chinook_Salmon	NA	162	0.0120	1.20	UBC	Thomas	dna_new_BC_2011-12-13.csv
Pv12.227	Belle Chain	48.8323	-123.1984	19	7	2012	Harbour seal	HYDCOL	Hydrolagus_colliei	Spotted_Ratfish	2	NA	0.0500	5.00	UBC	Thomas	dna_new_BC_2011-12-13.csv
Pv12.227	Belle Chain	48.8323	-123.1984	19	7	2012	Harbour seal	ENOBIS	Enophrys_bison	Buffalo_Sculpin	3	NA	0.0750	7.50	UBC	Thomas	dna_new_BC_2011-12-13.csv
Pv12.227	Belle Chain	48.8323	-123.1984	19	7	2012	Harbour seal	CLUPAL	Clupea_pallasii	Pacific_Herring	9	NA	0.2250	22.50	UBC	Thomas	dna_new_BC_2011-12-13.csv
Pv12.227	Belle Chain	48.8323	-123.1984	19	7	2012	Harbour seal	GASACU	Gasterosteus_aculeatus	Threespine_Stickleback	1	NA	0.0250	2.50	UBC	Thomas	dna_new_BC_2011-12-13.csv
Pv12.227	Belle Chain	48.8323	-123.1984	19	7	2012	Harbour seal	HEXSTE	Hexagrammos_stelleri	Whitespotted_Greenling	1	NA	0.0250	2.50	UBC	Thomas	dna_new_BC_2011-12-13.csv
Pv12.227	Belle Chain	48.8323	-123.1984	19	7	2012	Harbour seal	LAMAYR	Lampetra_ayresii	River_Lamprey	1	NA	0.0250	2.50	UBC	Thomas	dna_new_BC_2011-12-13.csv
Pv12.227	Belle Chain	48.8323	-123.1984	19	7	2012	Harbour seal	MERPRO	Merluccius_productus	Pacific_Hake	2	NA	0.0500	5.00	UBC	Thomas	dna_new_BC_2011-12-13.csv
Pv12.227	Belle Chain	48.8323	-123.1984	19	7	2012	Harbour seal	ONCGOR	Oncorhynchus_gorbuscha	Pink_Salmon	6	NA	0.1500	15.00	UBC	Thomas	dna_new_BC_2011-12-13.csv
Pv12.227	Belle Chain	48.8323	-123.1984	19	7	2012	Harbour seal	ONCNER	Oncorhynchus_nerka	Sockeye_Salmon	10	NA	0.2500	25.00	UBC	Thomas	dna_new_BC_2011-12-13.csv
Pv12.227	Belle Chain	48.8323	-123.1984	19	7	2012	Harbour seal	ONCTSH	Oncorhynchus_tshawytscha	Chinook_Salmon	3	NA	0.0750	7.50	UBC	Thomas	dna_new_BC_2011-12-13.csv
Pv12.227	Belle Chain	48.8323	-123.1984	19	7	2012	Harbour seal	OPHELO	Ophiodon_elongatus	Lingcod	1	NA	0.0250	2.50	UBC	Thomas	dna_new_BC_2011-12-13.csv
Pv12.227	Belle Chain	48.8323	-123.1984	19	7	2012	Harbour seal	GADCHA	Gadus_chalcogrammus	Walleye_Pollock	1	NA	0.0250	2.50	UBC	Thomas	dna_new_BC_2011-12-13.csv
Pv12.293	Cowichan Bay	48.7562	-123.6223	31	7	2012	Harbour seal	ONCNER	Oncorhynchus_nerka	Sockeye_Salmon	198	NA	0.1351	13.51	UBC	Thomas	dna_new_BC_2011-12-13.csv
Pv12.293	Cowichan Bay	48.7562	-123.6223	31	7	2012	Harbour seal	ONCTSH	Oncorhynchus_tshawytscha	Chinook_Salmon	36	NA	0.0246	2.46	UBC	Thomas	dna_new_BC_2011-12-13.csv
Pv12.293	Cowichan Bay	48.7562	-123.6223	31	7	2012	Harbour seal	MERPRO	Merluccius_productus	Pacific_Hake	1083	NA	0.7387	73.87	UBC	Thomas	dna_new_BC_2011-12-13.csv
Pv12.293	Cowichan Bay	48.7562	-123.6223	31	7	2012	Harbour seal	ONCGOR	Oncorhynchus_gorbuscha	Pink_Salmon	149	NA	0.1016	10.16	UBC	Thomas	dna_new_BC_2011-12-13.csv
Pv12.294	Cowichan Bay	48.7562	-123.6223	31	7	2012	Harbour seal	CLUPAL	Clupea_pallasii	Pacific_Herring	6081	NA	1.0000	100.00	UBC	Thomas	dna_new_BC_2011-12-13.csv
Pv12.295	Cowichan Bay	48.7562	-123.6223	31	7	2012	Harbour seal	CLUPAL	Clupea_pallasii	Pacific_Herring	2093	NA	0.9882	98.82	UBC	Thomas	dna_new_BC_2011-12-13.csv
Pv12.295	Cowichan Bay	48.7562	-123.6223	31	7	2012	Harbour seal	ONCGOR	Oncorhynchus_gorbuscha	Pink_Salmon	NA	26	0.0015	0.15	UBC	Thomas	dna_new_BC_2011-12-13.csv
Pv12.295	Cowichan Bay	48.7562	-123.6223	31	7	2012	Harbour seal	ONCMYK	Oncorhynchus_mykiss	Steelhead	NA	7	0.0004	0.04	UBC	Thomas	dna_new_BC_2011-12-13.csv
Pv12.295	Cowichan Bay	48.7562	-123.6223	31	7	2012	Harbour seal	ONCNER	Oncorhynchus_nerka	Sockeye_Salmon	25	129	0.0075	0.75	UBC	Thomas	dna_new_BC_2011-12-13.csv
Pv12.295	Cowichan Bay	48.7562	-123.6223	31	7	2012	Harbour seal	ONCTSH	Oncorhynchus_tshawytscha	Chinook_Salmon	NA	41	0.0024	0.24	UBC	Thomas	dna_new_BC_2011-12-13.csv
Pv12.296	Cowichan Bay	48.7562	-123.6223	31	7	2012	Harbour seal	CLUPAL	Clupea_pallasii	Pacific_Herring	343	NA	0.2863	28.63	UBC	Thomas	dna_new_BC_2011-12-13.csv
Pv12.296	Cowichan Bay	48.7562	-123.6223	31	7	2012	Harbour seal	ONCGOR	Oncorhynchus_gorbuscha	Pink_Salmon	NA	16	0.0052	0.52	UBC	Thomas	dna_new_BC_2011-12-13.csv
Pv12.296	Cowichan Bay	48.7562	-123.6223	31	7	2012	Harbour seal	ONCKET	Oncorhynchus_keta	Chum_Salmon	NA	5	0.0016	0.16	UBC	Thomas	dna_new_BC_2011-12-13.csv
Pv12.296	Cowichan Bay	48.7562	-123.6223	31	7	2012	Harbour seal	ONCNER	Oncorhynchus_nerka	Sockeye_Salmon	61	102	0.0329	3.29	UBC	Thomas	dna_new_BC_2011-12-13.csv
Pv12.296	Cowichan Bay	48.7562	-123.6223	31	7	2012	Harbour seal	ONCTSH	Oncorhynchus_tshawytscha	Chinook_Salmon	NA	35	0.0113	1.13	UBC	Thomas	dna_new_BC_2011-12-13.csv
Pv12.296	Cowichan Bay	48.7562	-123.6223	31	7	2012	Harbour seal	GADCHA	Gadus_chalcogrammus	Walleye_Pollock	794	NA	0.6628	66.28	UBC	Thomas	dna_new_BC_2011-12-13.csv
Pv12.297	Cowichan Bay	48.7562	-123.6223	31	7	2012	Harbour seal	CLUPAL	Clupea_pallasii	Pacific_Herring	23	NA	0.0143	1.43	UBC	Thomas	dna_new_BC_2011-12-13.csv
Pv12.297	Cowichan Bay	48.7562	-123.6223	31	7	2012	Harbour seal	LUMSAG	Lumpenus_sagitta	Snake_Prickleback	1544	NA	0.9614	96.14	UBC	Thomas	dna_new_BC_2011-12-13.csv
Pv12.297	Cowichan Bay	48.7562	-123.6223	31	7	2012	Harbour seal	ONCNER	Oncorhynchus_nerka	Sockeye_Salmon	39	NA	0.0243	2.43	UBC	Thomas	dna_new_BC_2011-12-13.csv
Pv12.298	Cowichan Bay	48.7562	-123.6223	31	7	2012	Harbour seal	CLUPAL	Clupea_pallasii	Pacific_Herring	1493	NA	0.9583	95.83	UBC	Thomas	dna_new_BC_2011-12-13.csv
Pv12.298	Cowichan Bay	48.7562	-123.6223	31	7	2012	Harbour seal	ONCNER	Oncorhynchus_nerka	Sockeye_Salmon	27	34	0.0100	1.00	UBC	Thomas	dna_new_BC_2011-12-13.csv
Pv12.298	Cowichan Bay	48.7562	-123.6223	31	7	2012	Harbour seal	ONCGOR	Oncorhynchus_gorbuscha	Pink_Salmon	NA	7	0.0021	0.21	UBC	Thomas	dna_new_BC_2011-12-13.csv
Pv12.298	Cowichan Bay	48.7562	-123.6223	31	7	2012	Harbour seal	ONCKET	Oncorhynchus_keta	Chum_Salmon	NA	3	0.0009	0.09	UBC	Thomas	dna_new_BC_2011-12-13.csv
Pv12.298	Cowichan Bay	48.7562	-123.6223	31	7	2012	Harbour seal	ONCKIS	Oncorhynchus_kisutch	Coho_Salmon	NA	5	0.0015	0.15	UBC	Thomas	dna_new_BC_2011-12-13.csv
Pv12.298	Cowichan Bay	48.7562	-123.6223	31	7	2012	Harbour seal	ONCMYK	Oncorhynchus_mykiss	Steelhead	NA	2	0.0006	0.06	UBC	Thomas	dna_new_BC_2011-12-13.csv
Pv12.298	Cowichan Bay	48.7562	-123.6223	31	7	2012	Harbour seal	ONCTSH	Oncorhynchus_tshawytscha	Chinook_Salmon	NA	8	0.0023	0.23	UBC	Thomas	dna_new_BC_2011-12-13.csv
Pv12.298	Cowichan Bay	48.7562	-123.6223	31	7	2012	Harbour seal	ALLELO	Allosmerus_elongatus	Whitebait_Smelt	38	NA	0.0244	2.44	UBC	Thomas	dna_new_BC_2011-12-13.csv
Pv12.299	Cowichan Bay	48.7562	-123.6223	31	7	2012	Harbour seal	CLUPAL	Clupea_pallasii	Pacific_Herring	20	NA	0.0141	1.41	UBC	Thomas	dna_new_BC_2011-12-13.csv
Pv12.299	Cowichan Bay	48.7562	-123.6223	31	7	2012	Harbour seal	MERPRO	Merluccius_productus	Pacific_Hake	62	NA	0.0436	4.36	UBC	Thomas	dna_new_BC_2011-12-13.csv
Pv12.299	Cowichan Bay	48.7562	-123.6223	31	7	2012	Harbour seal	PARVET	Parophrys_vetulus	English_Sole	1339	NA	0.9423	94.23	UBC	Thomas	dna_new_BC_2011-12-13.csv
Pv12.301	Belle Chain	48.8323	-123.1984	9	8	2012	Harbour seal	ONCKET	Oncorhynchus_keta	Chum_Salmon	NA	3	0.0003	0.03	UBC	Thomas	dna_new_BC_2011-12-13.csv
Pv12.301	Belle Chain	48.8323	-123.1984	9	8	2012	Harbour seal	CLUPAL	Clupea_pallasii	Pacific_Herring	1774	NA	0.9850	98.50	UBC	Thomas	dna_new_BC_2011-12-13.csv
Pv12.301	Belle Chain	48.8323	-123.1984	9	8	2012	Harbour seal	ONCGOR	Oncorhynchus_gorbuscha	Pink_Salmon	NA	17	0.0019	0.19	UBC	Thomas	dna_new_BC_2011-12-13.csv
Pv12.301	Belle Chain	48.8323	-123.1984	9	8	2012	Harbour seal	ONCMYK	Oncorhynchus_mykiss	Steelhead	NA	5	0.0006	0.06	UBC	Thomas	dna_new_BC_2011-12-13.csv
Pv12.301	Belle Chain	48.8323	-123.1984	9	8	2012	Harbour seal	ONCTSH	Oncorhynchus_tshawytscha	Chinook_Salmon	NA	22	0.0025	0.25	UBC	Thomas	dna_new_BC_2011-12-13.csv
Pv12.301	Belle Chain	48.8323	-123.1984	9	8	2012	Harbour seal	ONCNER	Oncorhynchus_nerka	Sockeye_Salmon	27	86	0.0097	0.97	UBC	Thomas	dna_new_BC_2011-12-13.csv
Pv12.302	Belle Chain	48.8323	-123.1984	9	8	2012	Harbour seal	CLUPAL	Clupea_pallasii	Pacific_Herring	9	NA	0.2500	25.00	UBC	Thomas	dna_new_BC_2011-12-13.csv
Pv12.302	Belle Chain	48.8323	-123.1984	9	8	2012	Harbour seal	ENOBIS	Enophrys_bison	Buffalo_Sculpin	3	NA	0.0833	8.33	UBC	Thomas	dna_new_BC_2011-12-13.csv
Pv12.302	Belle Chain	48.8323	-123.1984	9	8	2012	Harbour seal	HYDCOL	Hydrolagus_colliei	Spotted_Ratfish	2	NA	0.0556	5.56	UBC	Thomas	dna_new_BC_2011-12-13.csv
Pv12.302	Belle Chain	48.8323	-123.1984	9	8	2012	Harbour seal	LAMAYR	Lampetra_ayresii	River_Lamprey	2	NA	0.0556	5.56	UBC	Thomas	dna_new_BC_2011-12-13.csv
Pv12.302	Belle Chain	48.8323	-123.1984	9	8	2012	Harbour seal	LEPARM	Leptocottus_armatus	Pacific_Staghorn_Sculpin	2	NA	0.0556	5.56	UBC	Thomas	dna_new_BC_2011-12-13.csv
Pv12.302	Belle Chain	48.8323	-123.1984	9	8	2012	Harbour seal	MICPAC	Microstomus_pacificus	Dover_Sole	1	NA	0.0278	2.78	UBC	Thomas	dna_new_BC_2011-12-13.csv
Pv12.302	Belle Chain	48.8323	-123.1984	9	8	2012	Harbour seal	MICPRO	Microgadus_proximus	Pacific_Tomcod	1	NA	0.0278	2.78	UBC	Thomas	dna_new_BC_2011-12-13.csv
Pv12.302	Belle Chain	48.8323	-123.1984	9	8	2012	Harbour seal	LEUSCH	Leuroglossus_schmidti	Northern_Smoothtongue	1	NA	0.0278	2.78	UBC	Thomas	dna_new_BC_2011-12-13.csv
Pv12.302	Belle Chain	48.8323	-123.1984	9	8	2012	Harbour seal	ONCGOR	Oncorhynchus_gorbuscha	Pink_Salmon	1	NA	0.0278	2.78	UBC	Thomas	dna_new_BC_2011-12-13.csv
Pv12.302	Belle Chain	48.8323	-123.1984	9	8	2012	Harbour seal	ONCNER	Oncorhynchus_nerka	Sockeye_Salmon	8	NA	0.2222	22.22	UBC	Thomas	dna_new_BC_2011-12-13.csv
Pv12.302	Belle Chain	48.8323	-123.1984	9	8	2012	Harbour seal	ONCTSH	Oncorhynchus_tshawytscha	Chinook_Salmon	3	NA	0.0833	8.33	UBC	Thomas	dna_new_BC_2011-12-13.csv
Pv12.302	Belle Chain	48.8323	-123.1984	9	8	2012	Harbour seal	GADCHA	Gadus_chalcogrammus	Walleye_Pollock	3	NA	0.0833	8.33	UBC	Thomas	dna_new_BC_2011-12-13.csv
Pv12.303	Belle Chain	48.8323	-123.1984	9	8	2012	Harbour seal	CLUPAL	Clupea_pallasii	Pacific_Herring	13	NA	0.0110	1.10	UBC	Thomas	dna_new_BC_2011-12-13.csv
Pv12.303	Belle Chain	48.8323	-123.1984	9	8	2012	Harbour seal	ONCGOR	Oncorhynchus_gorbuscha	Pink_Salmon	NA	752	0.1553	15.53	UBC	Thomas	dna_new_BC_2011-12-13.csv
Pv12.303	Belle Chain	48.8323	-123.1984	9	8	2012	Harbour seal	ONCNER	Oncorhynchus_nerka	Sockeye_Salmon	1102	3775	0.7794	77.94	UBC	Thomas	dna_new_BC_2011-12-13.csv
Pv12.303	Belle Chain	48.8323	-123.1984	9	8	2012	Harbour seal	OPHELO	Ophiodon_elongatus	Lingcod	64	NA	0.0543	5.43	UBC	Thomas	dna_new_BC_2011-12-13.csv
Pv12.305	Belle Chain	48.8323	-123.1984	9	8	2012	Harbour seal	ONCNER	Oncorhynchus_nerka	Sockeye_Salmon	21	46	0.0060	0.60	UBC	Thomas	dna_new_BC_2011-12-13.csv
Pv12.305	Belle Chain	48.8323	-123.1984	9	8	2012	Harbour seal	ONCTSH	Oncorhynchus_tshawytscha	Chinook_Salmon	NA	6	0.0008	0.08	UBC	Thomas	dna_new_BC_2011-12-13.csv
Pv12.305	Belle Chain	48.8323	-123.1984	9	8	2012	Harbour seal	ONCMYK	Oncorhynchus_mykiss	Steelhead	NA	12	0.0016	0.16	UBC	Thomas	dna_new_BC_2011-12-13.csv
Pv12.305	Belle Chain	48.8323	-123.1984	9	8	2012	Harbour seal	ONCKET	Oncorhynchus_keta	Chum_Salmon	NA	1	0.0001	0.01	UBC	Thomas	dna_new_BC_2011-12-13.csv
Pv12.305	Belle Chain	48.8323	-123.1984	9	8	2012	Harbour seal	ONCKIS	Oncorhynchus_kisutch	Coho_Salmon	NA	3	0.0004	0.04	UBC	Thomas	dna_new_BC_2011-12-13.csv
Pv12.305	Belle Chain	48.8323	-123.1984	9	8	2012	Harbour seal	CLUPAL	Clupea_pallasii	Pacific_Herring	1977	NA	0.9895	98.95	UBC	Thomas	dna_new_BC_2011-12-13.csv
Pv12.305	Belle Chain	48.8323	-123.1984	9	8	2012	Harbour seal	ONCGOR	Oncorhynchus_gorbuscha	Pink_Salmon	NA	12	0.0016	0.16	UBC	Thomas	dna_new_BC_2011-12-13.csv
Pv12.306	Belle Chain	48.8323	-123.1984	9	8	2012	Harbour seal	CLUPAL	Clupea_pallasii	Pacific_Herring	43	NA	0.1748	17.48	UBC	Thomas	dna_new_BC_2011-12-13.csv
Pv12.306	Belle Chain	48.8323	-123.1984	9	8	2012	Harbour seal	LAMAYR	Lampetra_ayresii	River_Lamprey	178	NA	0.7236	72.36	UBC	Thomas	dna_new_BC_2011-12-13.csv
Pv12.306	Belle Chain	48.8323	-123.1984	9	8	2012	Harbour seal	ONCGOR	Oncorhynchus_gorbuscha	Pink_Salmon	5	1	0.0073	0.73	UBC	Thomas	dna_new_BC_2011-12-13.csv
Pv12.306	Belle Chain	48.8323	-123.1984	9	8	2012	Harbour seal	ONCKET	Oncorhynchus_keta	Chum_Salmon	NA	1	0.0073	0.73	UBC	Thomas	dna_new_BC_2011-12-13.csv
Pv12.306	Belle Chain	48.8323	-123.1984	9	8	2012	Harbour seal	ONCNER	Oncorhynchus_nerka	Sockeye_Salmon	16	8	0.0581	5.81	UBC	Thomas	dna_new_BC_2011-12-13.csv
Pv12.306	Belle Chain	48.8323	-123.1984	9	8	2012	Harbour seal	ONCTSH	Oncorhynchus_tshawytscha	Chinook_Salmon	4	4	0.0290	2.90	UBC	Thomas	dna_new_BC_2011-12-13.csv
Pv12.307	Belle Chain	48.8323	-123.1984	9	8	2012	Harbour seal	ONCGOR	Oncorhynchus_gorbuscha	Pink_Salmon	NA	7	0.0013	0.13	UBC	Thomas	dna_new_BC_2011-12-13.csv
Pv12.307	Belle Chain	48.8323	-123.1984	9	8	2012	Harbour seal	ONCKET	Oncorhynchus_keta	Chum_Salmon	NA	6	0.0011	0.11	UBC	Thomas	dna_new_BC_2011-12-13.csv
Pv12.307	Belle Chain	48.8323	-123.1984	9	8	2012	Harbour seal	ONCNER	Oncorhynchus_nerka	Sockeye_Salmon	91	64	0.0121	1.21	UBC	Thomas	dna_new_BC_2011-12-13.csv
Pv12.307	Belle Chain	48.8323	-123.1984	9	8	2012	Harbour seal	ONCTSH	Oncorhynchus_tshawytscha	Chinook_Salmon	NA	10	0.0019	0.19	UBC	Thomas	dna_new_BC_2011-12-13.csv
Pv12.307	Belle Chain	48.8323	-123.1984	9	8	2012	Harbour seal	SALSAL	Salmo_salar	Atlantic_Salmon	NA	1	0.0002	0.02	UBC	Thomas	dna_new_BC_2011-12-13.csv
Pv12.307	Belle Chain	48.8323	-123.1984	9	8	2012	Harbour seal	GADCHA	Gadus_chalcogrammus	Walleye_Pollock	5391	NA	0.9834	98.34	UBC	Thomas	dna_new_BC_2011-12-13.csv
Pv12.309	Belle Chain	48.8323	-123.1984	9	8	2012	Harbour seal	MERPRO	Merluccius_productus	Pacific_Hake	1	NA	0.0270	2.70	UBC	Thomas	dna_new_BC_2011-12-13.csv
Pv12.309	Belle Chain	48.8323	-123.1984	9	8	2012	Harbour seal	ONCGOR	Oncorhynchus_gorbuscha	Pink_Salmon	1	NA	0.0270	2.70	UBC	Thomas	dna_new_BC_2011-12-13.csv
Pv12.309	Belle Chain	48.8323	-123.1984	9	8	2012	Harbour seal	ONCNER	Oncorhynchus_nerka	Sockeye_Salmon	20	NA	0.5405	54.05	UBC	Thomas	dna_new_BC_2011-12-13.csv
Pv12.309	Belle Chain	48.8323	-123.1984	9	8	2012	Harbour seal	ANAOCE	Anarrhichthys_ocellatus	Wolf_Eel	1	NA	0.0270	2.70	UBC	Thomas	dna_new_BC_2011-12-13.csv
Pv12.309	Belle Chain	48.8323	-123.1984	9	8	2012	Harbour seal	CLUPAL	Clupea_pallasii	Pacific_Herring	7	NA	0.1892	18.92	UBC	Thomas	dna_new_BC_2011-12-13.csv
Pv12.309	Belle Chain	48.8323	-123.1984	9	8	2012	Harbour seal	HIPSTE	Hippoglossus_stenolepis	Pacific_Halibut	1	NA	0.0270	2.70	UBC	Thomas	dna_new_BC_2011-12-13.csv
Pv12.309	Belle Chain	48.8323	-123.1984	9	8	2012	Harbour seal	LUMSAG	Lumpenus_sagitta	Snake_Prickleback	2	NA	0.0541	5.41	UBC	Thomas	dna_new_BC_2011-12-13.csv
Pv12.309	Belle Chain	48.8323	-123.1984	9	8	2012	Harbour seal	ONCTSH	Oncorhynchus_tshawytscha	Chinook_Salmon	1	NA	0.0270	2.70	UBC	Thomas	dna_new_BC_2011-12-13.csv
Pv12.309	Belle Chain	48.8323	-123.1984	9	8	2012	Harbour seal	PARVET	Parophrys_vetulus	English_Sole	1	NA	0.0270	2.70	UBC	Thomas	dna_new_BC_2011-12-13.csv
Pv12.309	Belle Chain	48.8323	-123.1984	9	8	2012	Harbour seal	GADCHA	Gadus_chalcogrammus	Walleye_Pollock	2	NA	0.0541	5.41	UBC	Thomas	dna_new_BC_2011-12-13.csv
Pv12.310	Belle Chain	48.8323	-123.1984	9	8	2012	Harbour seal	CLUPAL	Clupea_pallasii	Pacific_Herring	1096	NA	0.9352	93.52	UBC	Thomas	dna_new_BC_2011-12-13.csv
Pv12.310	Belle Chain	48.8323	-123.1984	9	8	2012	Harbour seal	ONCGOR	Oncorhynchus_gorbuscha	Pink_Salmon	NA	9	0.0070	0.70	UBC	Thomas	dna_new_BC_2011-12-13.csv
Pv12.310	Belle Chain	48.8323	-123.1984	9	8	2012	Harbour seal	ONCKET	Oncorhynchus_keta	Chum_Salmon	NA	1	0.0008	0.08	UBC	Thomas	dna_new_BC_2011-12-13.csv
Pv12.310	Belle Chain	48.8323	-123.1984	9	8	2012	Harbour seal	ONCKIS	Oncorhynchus_kisutch	Coho_Salmon	NA	3	0.0023	0.23	UBC	Thomas	dna_new_BC_2011-12-13.csv
Pv12.310	Belle Chain	48.8323	-123.1984	9	8	2012	Harbour seal	ONCMYK	Oncorhynchus_mykiss	Steelhead	NA	9	0.0070	0.70	UBC	Thomas	dna_new_BC_2011-12-13.csv
Pv12.310	Belle Chain	48.8323	-123.1984	9	8	2012	Harbour seal	ONCTSH	Oncorhynchus_tshawytscha	Chinook_Salmon	54	11	0.0086	0.86	UBC	Thomas	dna_new_BC_2011-12-13.csv
Pv12.310	Belle Chain	48.8323	-123.1984	9	8	2012	Harbour seal	SALMAL	Salvelinus_malma	Dolly_Varden	NA	3	0.0023	0.23	UBC	Thomas	dna_new_BC_2011-12-13.csv
Pv12.310	Belle Chain	48.8323	-123.1984	9	8	2012	Harbour seal	ONCNER	Oncorhynchus_nerka	Sockeye_Salmon	22	47	0.0367	3.67	UBC	Thomas	dna_new_BC_2011-12-13.csv
Pv12.311	Belle Chain	48.8323	-123.1984	9	8	2012	Harbour seal	CLUPAL	Clupea_pallasii	Pacific_Herring	13	NA	0.0929	9.29	UBC	Thomas	dna_new_BC_2011-12-13.csv
Pv12.311	Belle Chain	48.8323	-123.1984	9	8	2012	Harbour seal	ENOBIS	Enophrys_bison	Buffalo_Sculpin	5	NA	0.0357	3.57	UBC	Thomas	dna_new_BC_2011-12-13.csv
Pv12.311	Belle Chain	48.8323	-123.1984	9	8	2012	Harbour seal	ONCMYK	Oncorhynchus_mykiss	Steelhead	NA	6	0.1446	14.46	UBC	Thomas	dna_new_BC_2011-12-13.csv
Pv12.311	Belle Chain	48.8323	-123.1984	9	8	2012	Harbour seal	ONCTSH	Oncorhynchus_tshawytscha	Chinook_Salmon	4	2	0.0482	4.82	UBC	Thomas	dna_new_BC_2011-12-13.csv
Pv12.311	Belle Chain	48.8323	-123.1984	9	8	2012	Harbour seal	GADCHA	Gadus_chalcogrammus	Walleye_Pollock	3	NA	0.0214	2.14	UBC	Thomas	dna_new_BC_2011-12-13.csv
Pv12.311	Belle Chain	48.8323	-123.1984	9	8	2012	Harbour seal	HYDCOL	Hydrolagus_colliei	Spotted_Ratfish	90	NA	0.6429	64.29	UBC	Thomas	dna_new_BC_2011-12-13.csv
Pv12.311	Belle Chain	48.8323	-123.1984	9	8	2012	Harbour seal	LAMAYR	Lampetra_ayresii	River_Lamprey	2	NA	0.0143	1.43	UBC	Thomas	dna_new_BC_2011-12-13.csv
Pv12.312	Belle Chain	48.8323	-123.1984	9	8	2012	Harbour seal	ONCTSH	Oncorhynchus_tshawytscha	Chinook_Salmon	NA	2	0.0007	0.07	UBC	Thomas	dna_new_BC_2011-12-13.csv
Pv12.312	Belle Chain	48.8323	-123.1984	9	8	2012	Harbour seal	CLUPAL	Clupea_pallasii	Pacific_Herring	1279	NA	0.9869	98.69	UBC	Thomas	dna_new_BC_2011-12-13.csv
Pv12.312	Belle Chain	48.8323	-123.1984	9	8	2012	Harbour seal	ONCGOR	Oncorhynchus_gorbuscha	Pink_Salmon	NA	7	0.0024	0.24	UBC	Thomas	dna_new_BC_2011-12-13.csv
Pv12.312	Belle Chain	48.8323	-123.1984	9	8	2012	Harbour seal	ONCKET	Oncorhynchus_keta	Chum_Salmon	NA	1	0.0003	0.03	UBC	Thomas	dna_new_BC_2011-12-13.csv
Pv12.312	Belle Chain	48.8323	-123.1984	9	8	2012	Harbour seal	ONCMYK	Oncorhynchus_mykiss	Steelhead	NA	3	0.0010	0.10	UBC	Thomas	dna_new_BC_2011-12-13.csv
Pv12.312	Belle Chain	48.8323	-123.1984	9	8	2012	Harbour seal	ONCNER	Oncorhynchus_nerka	Sockeye_Salmon	17	25	0.0086	0.86	UBC	Thomas	dna_new_BC_2011-12-13.csv
Pv12.313	Belle Chain	48.8323	-123.1984	9	8	2012	Harbour seal	CLUPAL	Clupea_pallasii	Pacific_Herring	671	NA	0.9518	95.18	UBC	Thomas	dna_new_BC_2011-12-13.csv
Pv12.313	Belle Chain	48.8323	-123.1984	9	8	2012	Harbour seal	ONCGOR	Oncorhynchus_gorbuscha	Pink_Salmon	NA	1	0.0021	0.21	UBC	Thomas	dna_new_BC_2011-12-13.csv
Pv12.313	Belle Chain	48.8323	-123.1984	9	8	2012	Harbour seal	ONCMYK	Oncorhynchus_mykiss	Steelhead	NA	6	0.0126	1.26	UBC	Thomas	dna_new_BC_2011-12-13.csv
Pv12.313	Belle Chain	48.8323	-123.1984	9	8	2012	Harbour seal	ONCNER	Oncorhynchus_nerka	Sockeye_Salmon	34	13	0.0273	2.73	UBC	Thomas	dna_new_BC_2011-12-13.csv
Pv12.313	Belle Chain	48.8323	-123.1984	9	8	2012	Harbour seal	ONCTSH	Oncorhynchus_tshawytscha	Chinook_Salmon	NA	3	0.0063	0.63	UBC	Thomas	dna_new_BC_2011-12-13.csv
Pv12.314	Belle Chain	48.8323	-123.1984	9	8	2012	Harbour seal	ALLELO	Allosmerus_elongatus	Whitebait_Smelt	89	NA	0.0547	5.47	UBC	Thomas	dna_new_BC_2011-12-13.csv
Pv12.314	Belle Chain	48.8323	-123.1984	9	8	2012	Harbour seal	CLUPAL	Clupea_pallasii	Pacific_Herring	1498	NA	0.9213	92.13	UBC	Thomas	dna_new_BC_2011-12-13.csv
Pv12.314	Belle Chain	48.8323	-123.1984	9	8	2012	Harbour seal	ONCGOR	Oncorhynchus_gorbuscha	Pink_Salmon	NA	17	0.0023	0.23	UBC	Thomas	dna_new_BC_2011-12-13.csv
Pv12.314	Belle Chain	48.8323	-123.1984	9	8	2012	Harbour seal	ONCKET	Oncorhynchus_keta	Chum_Salmon	NA	4	0.0005	0.05	UBC	Thomas	dna_new_BC_2011-12-13.csv
Pv12.314	Belle Chain	48.8323	-123.1984	9	8	2012	Harbour seal	ONCKIS	Oncorhynchus_kisutch	Coho_Salmon	NA	3	0.0004	0.04	UBC	Thomas	dna_new_BC_2011-12-13.csv
Pv12.314	Belle Chain	48.8323	-123.1984	9	8	2012	Harbour seal	ONCMYK	Oncorhynchus_mykiss	Steelhead	NA	13	0.0017	0.17	UBC	Thomas	dna_new_BC_2011-12-13.csv
Pv12.314	Belle Chain	48.8323	-123.1984	9	8	2012	Harbour seal	ONCNER	Oncorhynchus_nerka	Sockeye_Salmon	21	108	0.0143	1.43	UBC	Thomas	dna_new_BC_2011-12-13.csv
Pv12.314	Belle Chain	48.8323	-123.1984	9	8	2012	Harbour seal	ONCTSH	Oncorhynchus_tshawytscha	Chinook_Salmon	18	36	0.0048	0.48	UBC	Thomas	dna_new_BC_2011-12-13.csv
Pv12.315	Belle Chain	48.8323	-123.1984	9	8	2012	Harbour seal	CLUPAL	Clupea_pallasii	Pacific_Herring	1600	NA	0.1747	17.47	UBC	Thomas	dna_new_BC_2011-12-13.csv
Pv12.315	Belle Chain	48.8323	-123.1984	9	8	2012	Harbour seal	LAMAYR	Lampetra_ayresii	River_Lamprey	1516	NA	0.1655	16.55	UBC	Thomas	dna_new_BC_2011-12-13.csv
Pv12.315	Belle Chain	48.8323	-123.1984	9	8	2012	Harbour seal	OPHELO	Ophiodon_elongatus	Lingcod	552	NA	0.0603	6.03	UBC	Thomas	dna_new_BC_2011-12-13.csv
Pv12.315	Belle Chain	48.8323	-123.1984	9	8	2012	Harbour seal	GADCHA	Gadus_chalcogrammus	Walleye_Pollock	5493	NA	0.5996	59.96	UBC	Thomas	dna_new_BC_2011-12-13.csv
Pv12.316	Belle Chain	48.8323	-123.1984	9	8	2012	Harbour seal	ALOSAP	Alosa_sapidissima	American_Shad	1	NA	0.0169	1.69	UBC	Thomas	dna_new_BC_2011-12-13.csv
Pv12.316	Belle Chain	48.8323	-123.1984	9	8	2012	Harbour seal	CLUPAL	Clupea_pallasii	Pacific_Herring	9	NA	0.1525	15.25	UBC	Thomas	dna_new_BC_2011-12-13.csv
Pv12.316	Belle Chain	48.8323	-123.1984	9	8	2012	Harbour seal	ENOBIS	Enophrys_bison	Buffalo_Sculpin	4	NA	0.0678	6.78	UBC	Thomas	dna_new_BC_2011-12-13.csv
Pv12.316	Belle Chain	48.8323	-123.1984	9	8	2012	Harbour seal	ONCTSH	Oncorhynchus_tshawytscha	Chinook_Salmon	6	NA	0.1017	10.17	UBC	Thomas	dna_new_BC_2011-12-13.csv
Pv12.316	Belle Chain	48.8323	-123.1984	9	8	2012	Harbour seal	LAMAYR	Lampetra_ayresii	River_Lamprey	1	NA	0.0169	1.69	UBC	Thomas	dna_new_BC_2011-12-13.csv
Pv12.316	Belle Chain	48.8323	-123.1984	9	8	2012	Harbour seal	ONCGOR	Oncorhynchus_gorbuscha	Pink_Salmon	6	NA	0.1017	10.17	UBC	Thomas	dna_new_BC_2011-12-13.csv
Pv12.316	Belle Chain	48.8323	-123.1984	9	8	2012	Harbour seal	ONCNER	Oncorhynchus_nerka	Sockeye_Salmon	22	NA	0.3729	37.29	UBC	Thomas	dna_new_BC_2011-12-13.csv
Pv12.316	Belle Chain	48.8323	-123.1984	9	8	2012	Harbour seal	OPHELO	Ophiodon_elongatus	Lingcod	1	NA	0.0169	1.69	UBC	Thomas	dna_new_BC_2011-12-13.csv
Pv12.316	Belle Chain	48.8323	-123.1984	9	8	2012	Harbour seal	PARVET	Parophrys_vetulus	English_Sole	4	NA	0.0678	6.78	UBC	Thomas	dna_new_BC_2011-12-13.csv
Pv12.316	Belle Chain	48.8323	-123.1984	9	8	2012	Harbour seal	GADCHA	Gadus_chalcogrammus	Walleye_Pollock	5	NA	0.0847	8.47	UBC	Thomas	dna_new_BC_2011-12-13.csv
Pv12.317	Belle Chain	48.8323	-123.1984	9	8	2012	Harbour seal	ONCNER	Oncorhynchus_nerka	Sockeye_Salmon	42	178	0.0335	3.35	UBC	Thomas	dna_new_BC_2011-12-13.csv
Pv12.317	Belle Chain	48.8323	-123.1984	9	8	2012	Harbour seal	ONCTSH	Oncorhynchus_tshawytscha	Chinook_Salmon	276	1861	0.3498	34.98	UBC	Thomas	dna_new_BC_2011-12-13.csv
Pv12.317	Belle Chain	48.8323	-123.1984	9	8	2012	Harbour seal	AMMHEX	Ammodytes_hexapterus	Pacific_Sand_Lance	87	NA	0.0482	4.82	UBC	Thomas	dna_new_BC_2011-12-13.csv
Pv12.317	Belle Chain	48.8323	-123.1984	9	8	2012	Harbour seal	ONCGOR	Oncorhynchus_gorbuscha	Pink_Salmon	191	31	0.0058	0.58	UBC	Thomas	dna_new_BC_2011-12-13.csv
Pv12.317	Belle Chain	48.8323	-123.1984	9	8	2012	Harbour seal	CLUPAL	Clupea_pallasii	Pacific_Herring	1015	NA	0.5626	56.26	UBC	Thomas	dna_new_BC_2011-12-13.csv
Pv12.318	Belle Chain	48.8323	-123.1984	9	8	2012	Harbour seal	GADCHA	Gadus_chalcogrammus	Walleye_Pollock	1260	NA	0.6325	63.25	UBC	Thomas	dna_new_BC_2011-12-13.csv
Pv12.318	Belle Chain	48.8323	-123.1984	9	8	2012	Harbour seal	ONCGOR	Oncorhynchus_gorbuscha	Pink_Salmon	NA	33	0.0038	0.38	UBC	Thomas	dna_new_BC_2011-12-13.csv
Pv12.318	Belle Chain	48.8323	-123.1984	9	8	2012	Harbour seal	ONCNER	Oncorhynchus_nerka	Sockeye_Salmon	732	3140	0.3585	35.85	UBC	Thomas	dna_new_BC_2011-12-13.csv
Pv12.318	Belle Chain	48.8323	-123.1984	9	8	2012	Harbour seal	ONCTSH	Oncorhynchus_tshawytscha	Chinook_Salmon	NA	46	0.0053	0.53	UBC	Thomas	dna_new_BC_2011-12-13.csv
Pv12.319	Belle Chain	48.8323	-123.1984	9	8	2012	Harbour seal	ONCGOR	Oncorhynchus_gorbuscha	Pink_Salmon	8	3	0.0032	0.32	UBC	Thomas	dna_new_BC_2011-12-13.csv
Pv12.319	Belle Chain	48.8323	-123.1984	9	8	2012	Harbour seal	ONCKET	Oncorhynchus_keta	Chum_Salmon	NA	1	0.0011	0.11	UBC	Thomas	dna_new_BC_2011-12-13.csv
Pv12.319	Belle Chain	48.8323	-123.1984	9	8	2012	Harbour seal	ONCKIS	Oncorhynchus_kisutch	Coho_Salmon	NA	2	0.0021	0.21	UBC	Thomas	dna_new_BC_2011-12-13.csv
Pv12.319	Belle Chain	48.8323	-123.1984	9	8	2012	Harbour seal	ONCMYK	Oncorhynchus_mykiss	Steelhead	NA	4	0.0043	0.43	UBC	Thomas	dna_new_BC_2011-12-13.csv
Pv12.319	Belle Chain	48.8323	-123.1984	9	8	2012	Harbour seal	ONCNER	Oncorhynchus_nerka	Sockeye_Salmon	27	32	0.0343	3.43	UBC	Thomas	dna_new_BC_2011-12-13.csv
Pv12.319	Belle Chain	48.8323	-123.1984	9	8	2012	Harbour seal	ONCTSH	Oncorhynchus_tshawytscha	Chinook_Salmon	NA	4	0.0043	0.43	UBC	Thomas	dna_new_BC_2011-12-13.csv
Pv12.319	Belle Chain	48.8323	-123.1984	9	8	2012	Harbour seal	CLUPAL	Clupea_pallasii	Pacific_Herring	675	NA	0.9507	95.07	UBC	Thomas	dna_new_BC_2011-12-13.csv
Pv12.320	Belle Chain	48.8323	-123.1984	9	8	2012	Harbour seal	AMMHEX	Ammodytes_hexapterus	Pacific_Sand_Lance	180	NA	0.0623	6.23	UBC	Thomas	dna_new_BC_2011-12-13.csv
Pv12.320	Belle Chain	48.8323	-123.1984	9	8	2012	Harbour seal	CLUPAL	Clupea_pallasii	Pacific_Herring	2711	NA	0.9377	93.77	UBC	Thomas	dna_new_BC_2011-12-13.csv
Pv12.321	Comox	49.6016	-124.8904	10	8	2012	Harbour seal	CLUPAL	Clupea_pallasii	Pacific_Herring	12	NA	0.0194	1.94	UBC	Thomas	dna_new_BC_2011-12-13.csv
Pv12.321	Comox	49.6016	-124.8904	10	8	2012	Harbour seal	ONCGOR	Oncorhynchus_gorbuscha	Pink_Salmon	7	9	0.0034	0.34	UBC	Thomas	dna_new_BC_2011-12-13.csv
Pv12.321	Comox	49.6016	-124.8904	10	8	2012	Harbour seal	ONCKET	Oncorhynchus_keta	Chum_Salmon	NA	2	0.0008	0.08	UBC	Thomas	dna_new_BC_2011-12-13.csv
Pv12.321	Comox	49.6016	-124.8904	10	8	2012	Harbour seal	ONCNER	Oncorhynchus_nerka	Sockeye_Salmon	28	125	0.0474	4.74	UBC	Thomas	dna_new_BC_2011-12-13.csv
Pv12.321	Comox	49.6016	-124.8904	10	8	2012	Harbour seal	ONCTSH	Oncorhynchus_tshawytscha	Chinook_Salmon	NA	13	0.0049	0.49	UBC	Thomas	dna_new_BC_2011-12-13.csv
Pv12.321	Comox	49.6016	-124.8904	10	8	2012	Harbour seal	PARVET	Parophrys_vetulus	English_Sole	573	NA	0.9242	92.42	UBC	Thomas	dna_new_BC_2011-12-13.csv
Pv12.322	Comox	49.6016	-124.8904	10	8	2012	Harbour seal	ONCNER	Oncorhynchus_nerka	Sockeye_Salmon	17	1	0.0033	0.33	UBC	Thomas	dna_new_BC_2011-12-13.csv
Pv12.322	Comox	49.6016	-124.8904	10	8	2012	Harbour seal	ONCTSH	Oncorhynchus_tshawytscha	Chinook_Salmon	NA	1	0.0033	0.33	UBC	Thomas	dna_new_BC_2011-12-13.csv
Pv12.322	Comox	49.6016	-124.8904	10	8	2012	Harbour seal	MERPRO	Merluccius_productus	Pacific_Hake	1009	NA	0.9834	98.34	UBC	Thomas	dna_new_BC_2011-12-13.csv
Pv12.322	Comox	49.6016	-124.8904	10	8	2012	Harbour seal	ONCGOR	Oncorhynchus_gorbuscha	Pink_Salmon	NA	2	0.0066	0.66	UBC	Thomas	dna_new_BC_2011-12-13.csv
Pv12.322	Comox	49.6016	-124.8904	10	8	2012	Harbour seal	SALMAL	Salvelinus_malma	Dolly_Varden	NA	1	0.0033	0.33	UBC	Thomas	dna_new_BC_2011-12-13.csv
Pv12.323	Comox	49.6016	-124.8904	10	8	2012	Harbour seal	HEXSTE	Hexagrammos_stelleri	Whitespotted_Greenling	615	NA	0.8662	86.62	UBC	Thomas	dna_new_BC_2011-12-13.csv
Pv12.323	Comox	49.6016	-124.8904	10	8	2012	Harbour seal	LEPARM	Leptocottus_armatus	Pacific_Staghorn_Sculpin	9	NA	0.0127	1.27	UBC	Thomas	dna_new_BC_2011-12-13.csv
Pv12.323	Comox	49.6016	-124.8904	10	8	2012	Harbour seal	ONCGOR	Oncorhynchus_gorbuscha	Pink_Salmon	8	37	0.0021	0.21	UBC	Thomas	dna_new_BC_2011-12-13.csv
Pv12.323	Comox	49.6016	-124.8904	10	8	2012	Harbour seal	ONCNER	Oncorhynchus_nerka	Sockeye_Salmon	41	1186	0.0662	6.62	UBC	Thomas	dna_new_BC_2011-12-13.csv
Pv12.323	Comox	49.6016	-124.8904	10	8	2012	Harbour seal	ONCTSH	Oncorhynchus_tshawytscha	Chinook_Salmon	NA	14	0.0008	0.08	UBC	Thomas	dna_new_BC_2011-12-13.csv
Pv12.323	Comox	49.6016	-124.8904	10	8	2012	Harbour seal	GADCHA	Gadus_chalcogrammus	Walleye_Pollock	11	NA	0.0155	1.55	UBC	Thomas	dna_new_BC_2011-12-13.csv
Pv12.323	Comox	49.6016	-124.8904	10	8	2012	Harbour seal	CLUPAL	Clupea_pallasii	Pacific_Herring	26	NA	0.0366	3.66	UBC	Thomas	dna_new_BC_2011-12-13.csv
Pv12.324	Comox	49.6016	-124.8904	10	8	2012	Harbour seal	CLUPAL	Clupea_pallasii	Pacific_Herring	1826	NA	0.9335	93.35	UBC	Thomas	dna_new_BC_2011-12-13.csv
Pv12.324	Comox	49.6016	-124.8904	10	8	2012	Harbour seal	ONCGOR	Oncorhynchus_gorbuscha	Pink_Salmon	130	26	0.0083	0.83	UBC	Thomas	dna_new_BC_2011-12-13.csv
Pv12.324	Comox	49.6016	-124.8904	10	8	2012	Harbour seal	ONCKET	Oncorhynchus_keta	Chum_Salmon	NA	6	0.0019	0.19	UBC	Thomas	dna_new_BC_2011-12-13.csv
Pv12.324	Comox	49.6016	-124.8904	10	8	2012	Harbour seal	ONCKIS	Oncorhynchus_kisutch	Coho_Salmon	NA	3	0.0010	0.10	UBC	Thomas	dna_new_BC_2011-12-13.csv
Pv12.324	Comox	49.6016	-124.8904	10	8	2012	Harbour seal	ONCMYK	Oncorhynchus_mykiss	Steelhead	NA	6	0.0019	0.19	UBC	Thomas	dna_new_BC_2011-12-13.csv
Pv12.324	Comox	49.6016	-124.8904	10	8	2012	Harbour seal	ONCNER	Oncorhynchus_nerka	Sockeye_Salmon	NA	133	0.0423	4.23	UBC	Thomas	dna_new_BC_2011-12-13.csv
Pv12.324	Comox	49.6016	-124.8904	10	8	2012	Harbour seal	ONCTSH	Oncorhynchus_tshawytscha	Chinook_Salmon	NA	35	0.0111	1.11	UBC	Thomas	dna_new_BC_2011-12-13.csv
Pv12.325	Comox	49.6016	-124.8904	10	8	2012	Harbour seal	HYDCOL	Hydrolagus_colliei	Spotted_Ratfish	2	NA	0.0106	1.06	UBC	Thomas	dna_new_BC_2011-12-13.csv
Pv12.325	Comox	49.6016	-124.8904	10	8	2012	Harbour seal	LEPARM	Leptocottus_armatus	Pacific_Staghorn_Sculpin	58	NA	0.3085	30.85	UBC	Thomas	dna_new_BC_2011-12-13.csv
Pv12.325	Comox	49.6016	-124.8904	10	8	2012	Harbour seal	LUMSAG	Lumpenus_sagitta	Snake_Prickleback	2	NA	0.0106	1.06	UBC	Thomas	dna_new_BC_2011-12-13.csv
Pv12.325	Comox	49.6016	-124.8904	10	8	2012	Harbour seal	ONCGOR	Oncorhynchus_gorbuscha	Pink_Salmon	3	4	0.0681	6.81	UBC	Thomas	dna_new_BC_2011-12-13.csv
Pv12.325	Comox	49.6016	-124.8904	10	8	2012	Harbour seal	ONCKIS	Oncorhynchus_kisutch	Coho_Salmon	NA	1	0.0170	1.70	UBC	Thomas	dna_new_BC_2011-12-13.csv
Pv12.325	Comox	49.6016	-124.8904	10	8	2012	Harbour seal	PARVET	Parophrys_vetulus	English_Sole	90	NA	0.4787	47.87	UBC	Thomas	dna_new_BC_2011-12-13.csv
Pv12.325	Comox	49.6016	-124.8904	10	8	2012	Harbour seal	GADCHA	Gadus_chalcogrammus	Walleye_Pollock	7	NA	0.0372	3.72	UBC	Thomas	dna_new_BC_2011-12-13.csv
Pv12.325	Comox	49.6016	-124.8904	10	8	2012	Harbour seal	ENOBIS	Enophrys_bison	Buffalo_Sculpin	5	NA	0.0266	2.66	UBC	Thomas	dna_new_BC_2011-12-13.csv
Pv12.325	Comox	49.6016	-124.8904	10	8	2012	Harbour seal	CLUPAL	Clupea_pallasii	Pacific_Herring	5	NA	0.0266	2.66	UBC	Thomas	dna_new_BC_2011-12-13.csv
Pv12.325	Comox	49.6016	-124.8904	10	8	2012	Harbour seal	AMMHEX	Ammodytes_hexapterus	Pacific_Sand_Lance	3	NA	0.0160	1.60	UBC	Thomas	dna_new_BC_2011-12-13.csv
Pv12.326	Comox	49.6016	-124.8904	10	8	2012	Harbour seal	ONCKIS	Oncorhynchus_kisutch	Coho_Salmon	NA	6	0.0017	0.17	UBC	Thomas	dna_new_BC_2011-12-13.csv
Pv12.326	Comox	49.6016	-124.8904	10	8	2012	Harbour seal	ONCNER	Oncorhynchus_nerka	Sockeye_Salmon	32	231	0.0653	6.53	UBC	Thomas	dna_new_BC_2011-12-13.csv
Pv12.326	Comox	49.6016	-124.8904	10	8	2012	Harbour seal	AMMHEX	Ammodytes_hexapterus	Pacific_Sand_Lance	1398	NA	0.9179	91.79	UBC	Thomas	dna_new_BC_2011-12-13.csv
Pv12.326	Comox	49.6016	-124.8904	10	8	2012	Harbour seal	CLUPAL	Clupea_pallasii	Pacific_Herring	23	NA	0.0151	1.51	UBC	Thomas	dna_new_BC_2011-12-13.csv
Pv12.327	Comox	49.6016	-124.8904	10	8	2012	Harbour seal	GADCHA	Gadus_chalcogrammus	Walleye_Pollock	5	NA	0.0129	1.29	UBC	Thomas	dna_new_BC_2011-12-13.csv
Pv12.327	Comox	49.6016	-124.8904	10	8	2012	Harbour seal	ALLELO	Allosmerus_elongatus	Whitebait_Smelt	7	NA	0.0181	1.81	UBC	Thomas	dna_new_BC_2011-12-13.csv
Pv12.327	Comox	49.6016	-124.8904	10	8	2012	Harbour seal	CLUPAL	Clupea_pallasii	Pacific_Herring	10	NA	0.0258	2.58	UBC	Thomas	dna_new_BC_2011-12-13.csv
Pv12.327	Comox	49.6016	-124.8904	10	8	2012	Harbour seal	GADMAC	Gadus_macrocephalus	Pacific_Cod	6	NA	0.0155	1.55	UBC	Thomas	dna_new_BC_2011-12-13.csv
Pv12.327	Comox	49.6016	-124.8904	10	8	2012	Harbour seal	LYCPAC	Lycodes_pacificus	Blackbelly_Eelpout	343	NA	0.8863	88.63	UBC	Thomas	dna_new_BC_2011-12-13.csv
Pv12.327	Comox	49.6016	-124.8904	10	8	2012	Harbour seal	ONCNER	Oncorhynchus_nerka	Sockeye_Salmon	16	NA	0.0413	4.13	UBC	Thomas	dna_new_BC_2011-12-13.csv
Pv12.328	Comox	49.6016	-124.8904	10	8	2012	Harbour seal	ENOBIS	Enophrys_bison	Buffalo_Sculpin	1	NA	0.0172	1.72	UBC	Thomas	dna_new_BC_2011-12-13.csv
Pv12.328	Comox	49.6016	-124.8904	10	8	2012	Harbour seal	CLUPAL	Clupea_pallasii	Pacific_Herring	13	NA	0.2241	22.41	UBC	Thomas	dna_new_BC_2011-12-13.csv
Pv12.328	Comox	49.6016	-124.8904	10	8	2012	Harbour seal	LAMAYR	Lampetra_ayresii	River_Lamprey	1	NA	0.0172	1.72	UBC	Thomas	dna_new_BC_2011-12-13.csv
Pv12.328	Comox	49.6016	-124.8904	10	8	2012	Harbour seal	LEPARM	Leptocottus_armatus	Pacific_Staghorn_Sculpin	1	NA	0.0172	1.72	UBC	Thomas	dna_new_BC_2011-12-13.csv
Pv12.328	Comox	49.6016	-124.8904	10	8	2012	Harbour seal	LUMSAG	Lumpenus_sagitta	Snake_Prickleback	1	NA	0.0172	1.72	UBC	Thomas	dna_new_BC_2011-12-13.csv
Pv12.328	Comox	49.6016	-124.8904	10	8	2012	Harbour seal	LYCPAC	Lycodes_pacificus	Blackbelly_Eelpout	1	NA	0.0172	1.72	UBC	Thomas	dna_new_BC_2011-12-13.csv
Pv12.328	Comox	49.6016	-124.8904	10	8	2012	Harbour seal	MERPRO	Merluccius_productus	Pacific_Hake	3	NA	0.0517	5.17	UBC	Thomas	dna_new_BC_2011-12-13.csv
Pv12.328	Comox	49.6016	-124.8904	10	8	2012	Harbour seal	MYOPOL	Myoxocephalus_polyacanthocephalus	Great_Sculpin	1	NA	0.0172	1.72	UBC	Thomas	dna_new_BC_2011-12-13.csv
Pv12.328	Comox	49.6016	-124.8904	10	8	2012	Harbour seal	PARVET	Parophrys_vetulus	English_Sole	1	NA	0.0172	1.72	UBC	Thomas	dna_new_BC_2011-12-13.csv
Pv12.328	Comox	49.6016	-124.8904	10	8	2012	Harbour seal	NA	Lepidopsetta_bilineata_OR_ Platichthys_stellatus	Rock_Sole_OR_Starry_Flounder	1	NA	0.0172	1.72	UBC	Thomas	dna_new_BC_2011-12-13.csv
Pv12.328	Comox	49.6016	-124.8904	10	8	2012	Harbour seal	ONCGOR	Oncorhynchus_gorbuscha	Pink_Salmon	1	NA	0.0172	1.72	UBC	Thomas	dna_new_BC_2011-12-13.csv
Pv12.328	Comox	49.6016	-124.8904	10	8	2012	Harbour seal	ONCNER	Oncorhynchus_nerka	Sockeye_Salmon	20	NA	0.3448	34.48	UBC	Thomas	dna_new_BC_2011-12-13.csv
Pv12.328	Comox	49.6016	-124.8904	10	8	2012	Harbour seal	ONCTSH	Oncorhynchus_tshawytscha	Chinook_Salmon	3	NA	0.0517	5.17	UBC	Thomas	dna_new_BC_2011-12-13.csv
Pv12.328	Comox	49.6016	-124.8904	10	8	2012	Harbour seal	GADCHA	Gadus_chalcogrammus	Walleye_Pollock	10	NA	0.1724	17.24	UBC	Thomas	dna_new_BC_2011-12-13.csv
Pv12.329	Comox	49.6016	-124.8904	10	8	2012	Harbour seal	AMMHEX	Ammodytes_hexapterus	Pacific_Sand_Lance	404	NA	0.9287	92.87	UBC	Thomas	dna_new_BC_2011-12-13.csv
Pv12.329	Comox	49.6016	-124.8904	10	8	2012	Harbour seal	CLUPAL	Clupea_pallasii	Pacific_Herring	13	NA	0.0299	2.99	UBC	Thomas	dna_new_BC_2011-12-13.csv
Pv12.329	Comox	49.6016	-124.8904	10	8	2012	Harbour seal	ONCNER	Oncorhynchus_nerka	Sockeye_Salmon	18	NA	0.0414	4.14	UBC	Thomas	dna_new_BC_2011-12-13.csv
Pv12.330	Comox	49.6016	-124.8904	10	8	2012	Harbour seal	CLUPAL	Clupea_pallasii	Pacific_Herring	2125	NA	1.0000	100.00	UBC	Thomas	dna_new_BC_2011-12-13.csv
Pv12.331	Comox	49.6016	-124.8904	10	8	2012	Harbour seal	LUMSAG	Lumpenus_sagitta	Snake_Prickleback	1754	NA	0.9859	98.59	UBC	Thomas	dna_new_BC_2011-12-13.csv
Pv12.331	Comox	49.6016	-124.8904	10	8	2012	Harbour seal	ONCNER	Oncorhynchus_nerka	Sockeye_Salmon	25	NA	0.0141	1.41	UBC	Thomas	dna_new_BC_2011-12-13.csv
Pv12.332	Comox	49.6016	-124.8904	10	8	2012	Harbour seal	LAMAYR	Lampetra_ayresii	River_Lamprey	77	NA	0.0336	3.36	UBC	Thomas	dna_new_BC_2011-12-13.csv
Pv12.332	Comox	49.6016	-124.8904	10	8	2012	Harbour seal	MERPRO	Merluccius_productus	Pacific_Hake	71	NA	0.0310	3.10	UBC	Thomas	dna_new_BC_2011-12-13.csv
Pv12.332	Comox	49.6016	-124.8904	10	8	2012	Harbour seal	ONCGOR	Oncorhynchus_gorbuscha	Pink_Salmon	1089	3951	0.4547	45.47	UBC	Thomas	dna_new_BC_2011-12-13.csv
Pv12.332	Comox	49.6016	-124.8904	10	8	2012	Harbour seal	ONCNER	Oncorhynchus_nerka	Sockeye_Salmon	25	181	0.0208	2.08	UBC	Thomas	dna_new_BC_2011-12-13.csv
Pv12.332	Comox	49.6016	-124.8904	10	8	2012	Harbour seal	ONCTSH	Oncorhynchus_tshawytscha	Chinook_Salmon	138	621	0.0715	7.15	UBC	Thomas	dna_new_BC_2011-12-13.csv
Pv12.332	Comox	49.6016	-124.8904	10	8	2012	Harbour seal	GADCHA	Gadus_chalcogrammus	Walleye_Pollock	889	NA	0.3884	38.84	UBC	Thomas	dna_new_BC_2011-12-13.csv
Pv12.333	Comox	49.6016	-124.8904	10	8	2012	Harbour seal	CLUPAL	Clupea_pallasii	Pacific_Herring	7	NA	0.0121	1.21	UBC	Thomas	dna_new_BC_2011-12-13.csv
Pv12.333	Comox	49.6016	-124.8904	10	8	2012	Harbour seal	GASACU	Gasterosteus_aculeatus	Threespine_Stickleback	10	NA	0.0173	1.73	UBC	Thomas	dna_new_BC_2011-12-13.csv
Pv12.333	Comox	49.6016	-124.8904	10	8	2012	Harbour seal	MERPRO	Merluccius_productus	Pacific_Hake	555	NA	0.9585	95.85	UBC	Thomas	dna_new_BC_2011-12-13.csv
Pv12.333	Comox	49.6016	-124.8904	10	8	2012	Harbour seal	ONCNER	Oncorhynchus_nerka	Sockeye_Salmon	7	NA	0.0121	1.21	UBC	Thomas	dna_new_BC_2011-12-13.csv
Pv12.334	Comox	49.6016	-124.8904	10	8	2012	Harbour seal	CLUPAL	Clupea_pallasii	Pacific_Herring	15	NA	0.1293	12.93	UBC	Thomas	dna_new_BC_2011-12-13.csv
Pv12.334	Comox	49.6016	-124.8904	10	8	2012	Harbour seal	ONCGOR	Oncorhynchus_gorbuscha	Pink_Salmon	4	715	0.7940	79.40	UBC	Thomas	dna_new_BC_2011-12-13.csv
Pv12.334	Comox	49.6016	-124.8904	10	8	2012	Harbour seal	ONCNER	Oncorhynchus_nerka	Sockeye_Salmon	90	38	0.0422	4.22	UBC	Thomas	dna_new_BC_2011-12-13.csv
Pv12.334	Comox	49.6016	-124.8904	10	8	2012	Harbour seal	GADCHA	Gadus_chalcogrammus	Walleye_Pollock	4	NA	0.0345	3.45	UBC	Thomas	dna_new_BC_2011-12-13.csv
Pv12.335	Comox	49.6016	-124.8904	10	8	2012	Harbour seal	ALLELO	Allosmerus_elongatus	Whitebait_Smelt	45	NA	0.0133	1.33	UBC	Thomas	dna_new_BC_2011-12-13.csv
Pv12.335	Comox	49.6016	-124.8904	10	8	2012	Harbour seal	CLUPAL	Clupea_pallasii	Pacific_Herring	337	NA	0.0994	9.94	UBC	Thomas	dna_new_BC_2011-12-13.csv
Pv12.335	Comox	49.6016	-124.8904	10	8	2012	Harbour seal	GADMAC	Gadus_macrocephalus	Pacific_Cod	40	NA	0.0118	1.18	UBC	Thomas	dna_new_BC_2011-12-13.csv
Pv12.335	Comox	49.6016	-124.8904	10	8	2012	Harbour seal	HEXSTE	Hexagrammos_stelleri	Whitespotted_Greenling	234	NA	0.0690	6.90	UBC	Thomas	dna_new_BC_2011-12-13.csv
Pv12.335	Comox	49.6016	-124.8904	10	8	2012	Harbour seal	LEPARM	Leptocottus_armatus	Pacific_Staghorn_Sculpin	2512	NA	0.7412	74.12	UBC	Thomas	dna_new_BC_2011-12-13.csv
Pv12.335	Comox	49.6016	-124.8904	10	8	2012	Harbour seal	OPHELO	Ophiodon_elongatus	Lingcod	221	NA	0.0652	6.52	UBC	Thomas	dna_new_BC_2011-12-13.csv
Pv12.336	Comox	49.6016	-124.8904	10	8	2012	Harbour seal	CLUPAL	Clupea_pallasii	Pacific_Herring	99	NA	0.1015	10.15	UBC	Thomas	dna_new_BC_2011-12-13.csv
Pv12.336	Comox	49.6016	-124.8904	10	8	2012	Harbour seal	MERPRO	Merluccius_productus	Pacific_Hake	847	NA	0.8687	86.87	UBC	Thomas	dna_new_BC_2011-12-13.csv
Pv12.336	Comox	49.6016	-124.8904	10	8	2012	Harbour seal	ONCGOR	Oncorhynchus_gorbuscha	Pink_Salmon	10	1425	0.0285	2.85	UBC	Thomas	dna_new_BC_2011-12-13.csv
Pv12.336	Comox	49.6016	-124.8904	10	8	2012	Harbour seal	ONCNER	Oncorhynchus_nerka	Sockeye_Salmon	19	60	0.0012	0.12	UBC	Thomas	dna_new_BC_2011-12-13.csv
Pv12.337	Comox	49.6016	-124.8904	10	8	2012	Harbour seal	CLUPAL	Clupea_pallasii	Pacific_Herring	9	NA	0.0369	3.69	UBC	Thomas	dna_new_BC_2011-12-13.csv
Pv12.337	Comox	49.6016	-124.8904	10	8	2012	Harbour seal	LUMSAG	Lumpenus_sagitta	Snake_Prickleback	195	NA	0.7992	79.92	UBC	Thomas	dna_new_BC_2011-12-13.csv
Pv12.337	Comox	49.6016	-124.8904	10	8	2012	Harbour seal	MERPRO	Merluccius_productus	Pacific_Hake	3	NA	0.0123	1.23	UBC	Thomas	dna_new_BC_2011-12-13.csv
Pv12.337	Comox	49.6016	-124.8904	10	8	2012	Harbour seal	ONCKIS	Oncorhynchus_kisutch	Coho_Salmon	NA	783	0.0372	3.72	UBC	Thomas	dna_new_BC_2011-12-13.csv
Pv12.337	Comox	49.6016	-124.8904	10	8	2012	Harbour seal	ONCNER	Oncorhynchus_nerka	Sockeye_Salmon	15	51	0.0024	0.24	UBC	Thomas	dna_new_BC_2011-12-13.csv
Pv12.337	Comox	49.6016	-124.8904	10	8	2012	Harbour seal	ONCTSH	Oncorhynchus_tshawytscha	Chinook_Salmon	3	719	0.0342	3.42	UBC	Thomas	dna_new_BC_2011-12-13.csv
Pv12.337	Comox	49.6016	-124.8904	10	8	2012	Harbour seal	OPHELO	Ophiodon_elongatus	Lingcod	15	NA	0.0615	6.15	UBC	Thomas	dna_new_BC_2011-12-13.csv
Pv12.337	Comox	49.6016	-124.8904	10	8	2012	Harbour seal	GADCHA	Gadus_chalcogrammus	Walleye_Pollock	4	NA	0.0164	1.64	UBC	Thomas	dna_new_BC_2011-12-13.csv
Pv12.338	Comox	49.6016	-124.8904	10	8	2012	Harbour seal	CLUPAL	Clupea_pallasii	Pacific_Herring	97	NA	0.0404	4.04	UBC	Thomas	dna_new_BC_2011-12-13.csv
Pv12.338	Comox	49.6016	-124.8904	10	8	2012	Harbour seal	ONCNER	Oncorhynchus_nerka	Sockeye_Salmon	93	518	0.0351	3.51	UBC	Thomas	dna_new_BC_2011-12-13.csv
Pv12.338	Comox	49.6016	-124.8904	10	8	2012	Harbour seal	ONCTSH	Oncorhynchus_tshawytscha	Chinook_Salmon	2138	13647	0.9245	92.45	UBC	Thomas	dna_new_BC_2011-12-13.csv
Pv12.339	Comox	49.6016	-124.8904	10	8	2012	Harbour seal	CLUPAL	Clupea_pallasii	Pacific_Herring	12	NA	0.0183	1.83	UBC	Thomas	dna_new_BC_2011-12-13.csv
Pv12.339	Comox	49.6016	-124.8904	10	8	2012	Harbour seal	ONCGOR	Oncorhynchus_gorbuscha	Pink_Salmon	618	9973	0.9367	93.67	UBC	Thomas	dna_new_BC_2011-12-13.csv
Pv12.339	Comox	49.6016	-124.8904	10	8	2012	Harbour seal	ONCNER	Oncorhynchus_nerka	Sockeye_Salmon	27	479	0.0450	4.50	UBC	Thomas	dna_new_BC_2011-12-13.csv
Pv12.340	Comox	49.6016	-124.8904	10	8	2012	Harbour seal	ONCGOR	Oncorhynchus_gorbuscha	Pink_Salmon	2867	11132	0.9616	96.16	UBC	Thomas	dna_new_BC_2011-12-13.csv
Pv12.340	Comox	49.6016	-124.8904	10	8	2012	Harbour seal	ONCNER	Oncorhynchus_nerka	Sockeye_Salmon	59	445	0.0384	3.84	UBC	Thomas	dna_new_BC_2011-12-13.csv
Pv12.341	Cowichan Bay	48.7562	-123.6223	11	8	2012	Harbour seal	AMMHEX	Ammodytes_hexapterus	Pacific_Sand_Lance	1	NA	0.0169	1.69	UBC	Thomas	dna_new_BC_2011-12-13.csv
Pv12.341	Cowichan Bay	48.7562	-123.6223	11	8	2012	Harbour seal	CLUPAL	Clupea_pallasii	Pacific_Herring	9	NA	0.1525	15.25	UBC	Thomas	dna_new_BC_2011-12-13.csv
Pv12.341	Cowichan Bay	48.7562	-123.6223	11	8	2012	Harbour seal	COTASP	Cottus_asper	Prickly_Sculpin	1	NA	0.0169	1.69	UBC	Thomas	dna_new_BC_2011-12-13.csv
Pv12.341	Cowichan Bay	48.7562	-123.6223	11	8	2012	Harbour seal	ENGMOR	Engraulis_mordax	Northern_Anchovy	1	NA	0.0169	1.69	UBC	Thomas	dna_new_BC_2011-12-13.csv
Pv12.341	Cowichan Bay	48.7562	-123.6223	11	8	2012	Harbour seal	ENOBIS	Enophrys_bison	Buffalo_Sculpin	4	NA	0.0678	6.78	UBC	Thomas	dna_new_BC_2011-12-13.csv
Pv12.341	Cowichan Bay	48.7562	-123.6223	11	8	2012	Harbour seal	GADCHA	Gadus_chalcogrammus	Walleye_Pollock	1	NA	0.0169	1.69	UBC	Thomas	dna_new_BC_2011-12-13.csv
Pv12.341	Cowichan Bay	48.7562	-123.6223	11	8	2012	Harbour seal	HYDCOL	Hydrolagus_colliei	Spotted_Ratfish	1	NA	0.0169	1.69	UBC	Thomas	dna_new_BC_2011-12-13.csv
Pv12.341	Cowichan Bay	48.7562	-123.6223	11	8	2012	Harbour seal	LEPARM	Leptocottus_armatus	Pacific_Staghorn_Sculpin	5	NA	0.0847	8.47	UBC	Thomas	dna_new_BC_2011-12-13.csv
Pv12.341	Cowichan Bay	48.7562	-123.6223	11	8	2012	Harbour seal	LUMSAG	Lumpenus_sagitta	Snake_Prickleback	1	NA	0.0169	1.69	UBC	Thomas	dna_new_BC_2011-12-13.csv
Pv12.341	Cowichan Bay	48.7562	-123.6223	11	8	2012	Harbour seal	LYCPAC	Lycodes_pacificus	Blackbelly_Eelpout	1	NA	0.0169	1.69	UBC	Thomas	dna_new_BC_2011-12-13.csv
Pv12.341	Cowichan Bay	48.7562	-123.6223	11	8	2012	Harbour seal	MERPRO	Merluccius_productus	Pacific_Hake	2	NA	0.0339	3.39	UBC	Thomas	dna_new_BC_2011-12-13.csv
Pv12.341	Cowichan Bay	48.7562	-123.6223	11	8	2012	Harbour seal	MYOPOL	Myoxocephalus_polyacanthocephalus	Great_Sculpin	1	NA	0.0169	1.69	UBC	Thomas	dna_new_BC_2011-12-13.csv
Pv12.341	Cowichan Bay	48.7562	-123.6223	11	8	2012	Harbour seal	ONCGOR	Oncorhynchus_gorbuscha	Pink_Salmon	9	3	0.2542	25.42	UBC	Thomas	dna_new_BC_2011-12-13.csv
Pv12.341	Cowichan Bay	48.7562	-123.6223	11	8	2012	Harbour seal	ONCNER	Oncorhynchus_nerka	Sockeye_Salmon	19	3	0.2542	25.42	UBC	Thomas	dna_new_BC_2011-12-13.csv
Pv12.341	Cowichan Bay	48.7562	-123.6223	11	8	2012	Harbour seal	PARVET	Parophrys_vetulus	English_Sole	1	NA	0.0169	1.69	UBC	Thomas	dna_new_BC_2011-12-13.csv
Pv12.342	Cowichan Bay	48.7562	-123.6223	11	8	2012	Harbour seal	CLUPAL	Clupea_pallasii	Pacific_Herring	55	NA	0.0250	2.50	UBC	Thomas	dna_new_BC_2011-12-13.csv
Pv12.342	Cowichan Bay	48.7562	-123.6223	11	8	2012	Harbour seal	ONCNER	Oncorhynchus_nerka	Sockeye_Salmon	2148	11189	0.9750	97.50	UBC	Thomas	dna_new_BC_2011-12-13.csv
Pv12.343	Cowichan Bay	48.7562	-123.6223	11	8	2012	Harbour seal	ALLELO	Allosmerus_elongatus	Whitebait_Smelt	59	NA	0.0259	2.59	UBC	Thomas	dna_new_BC_2011-12-13.csv
Pv12.343	Cowichan Bay	48.7562	-123.6223	11	8	2012	Harbour seal	HYDCOL	Hydrolagus_colliei	Spotted_Ratfish	62	NA	0.0273	2.73	UBC	Thomas	dna_new_BC_2011-12-13.csv
Pv12.343	Cowichan Bay	48.7562	-123.6223	11	8	2012	Harbour seal	ONCNER	Oncorhynchus_nerka	Sockeye_Salmon	2109	22301	0.9270	92.70	UBC	Thomas	dna_new_BC_2011-12-13.csv
Pv12.343	Cowichan Bay	48.7562	-123.6223	11	8	2012	Harbour seal	OPHELO	Ophiodon_elongatus	Lingcod	45	NA	0.0198	1.98	UBC	Thomas	dna_new_BC_2011-12-13.csv
Pv12.344	Cowichan Bay	48.7562	-123.6223	11	8	2012	Harbour seal	ENOBIS	Enophrys_bison	Buffalo_Sculpin	2833	NA	1.0000	100.00	UBC	Thomas	dna_new_BC_2011-12-13.csv
Pv12.345	Cowichan Bay	48.7562	-123.6223	11	8	2012	Harbour seal	BERMAG	Berryteuthis_magister	Magister_Armhook_Squid	31	NA	0.0504	5.04	UBC	Thomas	dna_new_BC_2011-12-13.csv
Pv12.345	Cowichan Bay	48.7562	-123.6223	11	8	2012	Harbour seal	CLUPAL	Clupea_pallasii	Pacific_Herring	110	NA	0.1789	17.89	UBC	Thomas	dna_new_BC_2011-12-13.csv
Pv12.345	Cowichan Bay	48.7562	-123.6223	11	8	2012	Harbour seal	MERPRO	Merluccius_productus	Pacific_Hake	395	NA	0.6423	64.23	UBC	Thomas	dna_new_BC_2011-12-13.csv
Pv12.345	Cowichan Bay	48.7562	-123.6223	11	8	2012	Harbour seal	ONCGOR	Oncorhynchus_gorbuscha	Pink_Salmon	NA	3	0.0086	0.86	UBC	Thomas	dna_new_BC_2011-12-13.csv
Pv12.345	Cowichan Bay	48.7562	-123.6223	11	8	2012	Harbour seal	ONCKIS	Oncorhynchus_kisutch	Coho_Salmon	NA	1	0.0029	0.29	UBC	Thomas	dna_new_BC_2011-12-13.csv
Pv12.345	Cowichan Bay	48.7562	-123.6223	11	8	2012	Harbour seal	ONCMYK	Oncorhynchus_mykiss	Steelhead	NA	1	0.0029	0.29	UBC	Thomas	dna_new_BC_2011-12-13.csv
Pv12.345	Cowichan Bay	48.7562	-123.6223	11	8	2012	Harbour seal	ONCNER	Oncorhynchus_nerka	Sockeye_Salmon	37	12	0.0344	3.44	UBC	Thomas	dna_new_BC_2011-12-13.csv
Pv12.345	Cowichan Bay	48.7562	-123.6223	11	8	2012	Harbour seal	ONCTSH	Oncorhynchus_tshawytscha	Chinook_Salmon	NA	4	0.0115	1.15	UBC	Thomas	dna_new_BC_2011-12-13.csv
Pv12.345	Cowichan Bay	48.7562	-123.6223	11	8	2012	Harbour seal	GADCHA	Gadus_chalcogrammus	Walleye_Pollock	42	NA	0.0683	6.83	UBC	Thomas	dna_new_BC_2011-12-13.csv
Pv12.346	Cowichan Bay	48.7562	-123.6223	11	8	2012	Harbour seal	CLUPAL	Clupea_pallasii	Pacific_Herring	2376	NA	0.9794	97.94	UBC	Thomas	dna_new_BC_2011-12-13.csv
Pv12.346	Cowichan Bay	48.7562	-123.6223	11	8	2012	Harbour seal	ONCGOR	Oncorhynchus_gorbuscha	Pink_Salmon	NA	13	0.0024	0.24	UBC	Thomas	dna_new_BC_2011-12-13.csv
Pv12.346	Cowichan Bay	48.7562	-123.6223	11	8	2012	Harbour seal	ONCMYK	Oncorhynchus_mykiss	Steelhead	NA	5	0.0009	0.09	UBC	Thomas	dna_new_BC_2011-12-13.csv
Pv12.346	Cowichan Bay	48.7562	-123.6223	11	8	2012	Harbour seal	ONCNER	Oncorhynchus_nerka	Sockeye_Salmon	50	75	0.0137	1.37	UBC	Thomas	dna_new_BC_2011-12-13.csv
Pv12.346	Cowichan Bay	48.7562	-123.6223	11	8	2012	Harbour seal	ONCTSH	Oncorhynchus_tshawytscha	Chinook_Salmon	NA	18	0.0033	0.33	UBC	Thomas	dna_new_BC_2011-12-13.csv
Pv12.346	Cowichan Bay	48.7562	-123.6223	11	8	2012	Harbour seal	SALMAL	Salvelinus_malma	Dolly_Varden	NA	2	0.0004	0.04	UBC	Thomas	dna_new_BC_2011-12-13.csv
Pv12.347	Cowichan Bay	48.7562	-123.6223	11	8	2012	Harbour seal	ENOBIS	Enophrys_bison	Buffalo_Sculpin	2456	NA	0.9669	96.69	UBC	Thomas	dna_new_BC_2011-12-13.csv
Pv12.347	Cowichan Bay	48.7562	-123.6223	11	8	2012	Harbour seal	OPHELO	Ophiodon_elongatus	Lingcod	84	NA	0.0331	3.31	UBC	Thomas	dna_new_BC_2011-12-13.csv
Pv12.348	Cowichan Bay	48.7562	-123.6223	11	8	2012	Harbour seal	CLUPAL	Clupea_pallasii	Pacific_Herring	965	NA	1.0000	100.00	UBC	Thomas	dna_new_BC_2011-12-13.csv
Pv12.349	Cowichan Bay	48.7562	-123.6223	11	8	2012	Harbour seal	CLUPAL	Clupea_pallasii	Pacific_Herring	1739	NA	0.9067	90.67	UBC	Thomas	dna_new_BC_2011-12-13.csv
Pv12.349	Cowichan Bay	48.7562	-123.6223	11	8	2012	Harbour seal	ONCGOR	Oncorhynchus_gorbuscha	Pink_Salmon	NA	1	0.0002	0.02	UBC	Thomas	dna_new_BC_2011-12-13.csv
Pv12.349	Cowichan Bay	48.7562	-123.6223	11	8	2012	Harbour seal	ONCKET	Oncorhynchus_keta	Chum_Salmon	NA	2	0.0005	0.05	UBC	Thomas	dna_new_BC_2011-12-13.csv
Pv12.349	Cowichan Bay	48.7562	-123.6223	11	8	2012	Harbour seal	ONCNER	Oncorhynchus_nerka	Sockeye_Salmon	33	61	0.0144	1.44	UBC	Thomas	dna_new_BC_2011-12-13.csv
Pv12.349	Cowichan Bay	48.7562	-123.6223	11	8	2012	Harbour seal	ONCTSH	Oncorhynchus_tshawytscha	Chinook_Salmon	NA	9	0.0021	0.21	UBC	Thomas	dna_new_BC_2011-12-13.csv
Pv12.349	Cowichan Bay	48.7562	-123.6223	11	8	2012	Harbour seal	TRITRI	Trichodon_trichodon	Pacific_Sandfish	146	NA	0.0761	7.61	UBC	Thomas	dna_new_BC_2011-12-13.csv
Pv12.350	Cowichan Bay	48.7562	-123.6223	11	8	2012	Harbour seal	CLUPAL	Clupea_pallasii	Pacific_Herring	3	NA	0.0214	2.14	UBC	Thomas	dna_new_BC_2011-12-13.csv
Pv12.350	Cowichan Bay	48.7562	-123.6223	11	8	2012	Harbour seal	HYDCOL	Hydrolagus_colliei	Spotted_Ratfish	36	NA	0.2571	25.71	UBC	Thomas	dna_new_BC_2011-12-13.csv
Pv12.350	Cowichan Bay	48.7562	-123.6223	11	8	2012	Harbour seal	MERPRO	Merluccius_productus	Pacific_Hake	92	NA	0.6571	65.71	UBC	Thomas	dna_new_BC_2011-12-13.csv
Pv12.350	Cowichan Bay	48.7562	-123.6223	11	8	2012	Harbour seal	ONCNER	Oncorhynchus_nerka	Sockeye_Salmon	7	NA	0.0500	5.00	UBC	Thomas	dna_new_BC_2011-12-13.csv
Pv12.350	Cowichan Bay	48.7562	-123.6223	11	8	2012	Harbour seal	ONCTSH	Oncorhynchus_tshawytscha	Chinook_Salmon	2	NA	0.0143	1.43	UBC	Thomas	dna_new_BC_2011-12-13.csv
Pv12.351	Cowichan Bay	48.7562	-123.6223	11	8	2012	Harbour seal	ONCKET	Oncorhynchus_keta	Chum_Salmon	NA	1	0.0033	0.33	UBC	Thomas	dna_new_BC_2011-12-13.csv
Pv12.351	Cowichan Bay	48.7562	-123.6223	11	8	2012	Harbour seal	ONCMYK	Oncorhynchus_mykiss	Steelhead	NA	1	0.0033	0.33	UBC	Thomas	dna_new_BC_2011-12-13.csv
Pv12.351	Cowichan Bay	48.7562	-123.6223	11	8	2012	Harbour seal	ONCTSH	Oncorhynchus_tshawytscha	Chinook_Salmon	NA	1	0.0033	0.33	UBC	Thomas	dna_new_BC_2011-12-13.csv
Pv12.351	Cowichan Bay	48.7562	-123.6223	11	8	2012	Harbour seal	ONCNER	Oncorhynchus_nerka	Sockeye_Salmon	12	7	0.0232	2.32	UBC	Thomas	dna_new_BC_2011-12-13.csv
Pv12.351	Cowichan Bay	48.7562	-123.6223	11	8	2012	Harbour seal	ONCGOR	Oncorhynchus_gorbuscha	Pink_Salmon	8	1	0.0033	0.33	UBC	Thomas	dna_new_BC_2011-12-13.csv
Pv12.351	Cowichan Bay	48.7562	-123.6223	11	8	2012	Harbour seal	CLUPAL	Clupea_pallasii	Pacific_Herring	52	NA	0.0947	9.47	UBC	Thomas	dna_new_BC_2011-12-13.csv
Pv12.351	Cowichan Bay	48.7562	-123.6223	11	8	2012	Harbour seal	MERPRO	Merluccius_productus	Pacific_Hake	477	NA	0.8689	86.89	UBC	Thomas	dna_new_BC_2011-12-13.csv
Pv12.352	Cowichan Bay	48.7562	-123.6223	11	8	2012	Harbour seal	LEPARM	Leptocottus_armatus	Pacific_Staghorn_Sculpin	3096	NA	0.6591	65.91	UBC	Thomas	dna_new_BC_2011-12-13.csv
Pv12.352	Cowichan Bay	48.7562	-123.6223	11	8	2012	Harbour seal	ONCGOR	Oncorhynchus_gorbuscha	Pink_Salmon	NA	3	0.0006	0.06	UBC	Thomas	dna_new_BC_2011-12-13.csv
Pv12.352	Cowichan Bay	48.7562	-123.6223	11	8	2012	Harbour seal	NA	Artedius_fenestralis_OR_ Artedius_lateralis	Padded_OR_Smoothhead_Sculpin	390	NA	0.0830	8.30	UBC	Thomas	dna_new_BC_2011-12-13.csv
Pv12.352	Cowichan Bay	48.7562	-123.6223	11	8	2012	Harbour seal	CLUPAL	Clupea_pallasii	Pacific_Herring	215	NA	0.0458	4.58	UBC	Thomas	dna_new_BC_2011-12-13.csv
Pv12.352	Cowichan Bay	48.7562	-123.6223	11	8	2012	Harbour seal	ONCKET	Oncorhynchus_keta	Chum_Salmon	NA	1	0.0002	0.02	UBC	Thomas	dna_new_BC_2011-12-13.csv
Pv12.352	Cowichan Bay	48.7562	-123.6223	11	8	2012	Harbour seal	ONCNER	Oncorhynchus_nerka	Sockeye_Salmon	53	47	0.0091	0.91	UBC	Thomas	dna_new_BC_2011-12-13.csv
Pv12.352	Cowichan Bay	48.7562	-123.6223	11	8	2012	Harbour seal	ONCTSH	Oncorhynchus_tshawytscha	Chinook_Salmon	NA	7	0.0014	0.14	UBC	Thomas	dna_new_BC_2011-12-13.csv
Pv12.352	Cowichan Bay	48.7562	-123.6223	11	8	2012	Harbour seal	GADCHA	Gadus_chalcogrammus	Walleye_Pollock	582	NA	0.1239	12.39	UBC	Thomas	dna_new_BC_2011-12-13.csv
Pv12.352	Cowichan Bay	48.7562	-123.6223	11	8	2012	Harbour seal	MYOPOL	Myoxocephalus_polyacanthocephalus	Great_Sculpin	194	NA	0.0413	4.13	UBC	Thomas	dna_new_BC_2011-12-13.csv
Pv12.352	Cowichan Bay	48.7562	-123.6223	11	8	2012	Harbour seal	ENGMOR	Engraulis_mordax	Northern_Anchovy	167	NA	0.0356	3.56	UBC	Thomas	dna_new_BC_2011-12-13.csv
Pv12.353	Cowichan Bay	48.7562	-123.6223	11	8	2012	Harbour seal	CLUPAL	Clupea_pallasii	Pacific_Herring	1366	NA	0.8309	83.09	UBC	Thomas	dna_new_BC_2011-12-13.csv
Pv12.353	Cowichan Bay	48.7562	-123.6223	11	8	2012	Harbour seal	PARVET	Parophrys_vetulus	English_Sole	278	NA	0.1691	16.91	UBC	Thomas	dna_new_BC_2011-12-13.csv
Pv12.354	Cowichan Bay	48.7562	-123.6223	11	8	2012	Harbour seal	CLUPAL	Clupea_pallasii	Pacific_Herring	1345	NA	0.8622	86.22	UBC	Thomas	dna_new_BC_2011-12-13.csv
Pv12.354	Cowichan Bay	48.7562	-123.6223	11	8	2012	Harbour seal	MERPRO	Merluccius_productus	Pacific_Hake	198	NA	0.1269	12.69	UBC	Thomas	dna_new_BC_2011-12-13.csv
Pv12.354	Cowichan Bay	48.7562	-123.6223	11	8	2012	Harbour seal	ONCKIS	Oncorhynchus_kisutch	Coho_Salmon	NA	1	0.0007	0.07	UBC	Thomas	dna_new_BC_2011-12-13.csv
Pv12.354	Cowichan Bay	48.7562	-123.6223	11	8	2012	Harbour seal	ONCNER	Oncorhynchus_nerka	Sockeye_Salmon	17	8	0.0058	0.58	UBC	Thomas	dna_new_BC_2011-12-13.csv
Pv12.354	Cowichan Bay	48.7562	-123.6223	11	8	2012	Harbour seal	ONCTSH	Oncorhynchus_tshawytscha	Chinook_Salmon	NA	4	0.0029	0.29	UBC	Thomas	dna_new_BC_2011-12-13.csv
Pv12.354	Cowichan Bay	48.7562	-123.6223	11	8	2012	Harbour seal	ONCGOR	Oncorhynchus_gorbuscha	Pink_Salmon	NA	2	0.0015	0.15	UBC	Thomas	dna_new_BC_2011-12-13.csv
Pv12.355	Cowichan Bay	48.7562	-123.6223	11	8	2012	Harbour seal	CLUPAL	Clupea_pallasii	Pacific_Herring	1360	NA	0.9862	98.62	UBC	Thomas	dna_new_BC_2011-12-13.csv
Pv12.355	Cowichan Bay	48.7562	-123.6223	11	8	2012	Harbour seal	ONCGOR	Oncorhynchus_gorbuscha	Pink_Salmon	NA	11	0.0012	0.12	UBC	Thomas	dna_new_BC_2011-12-13.csv
Pv12.355	Cowichan Bay	48.7562	-123.6223	11	8	2012	Harbour seal	ONCKET	Oncorhynchus_keta	Chum_Salmon	NA	2	0.0002	0.02	UBC	Thomas	dna_new_BC_2011-12-13.csv
Pv12.355	Cowichan Bay	48.7562	-123.6223	11	8	2012	Harbour seal	ONCKIS	Oncorhynchus_kisutch	Coho_Salmon	NA	2	0.0002	0.02	UBC	Thomas	dna_new_BC_2011-12-13.csv
Pv12.355	Cowichan Bay	48.7562	-123.6223	11	8	2012	Harbour seal	ONCMYK	Oncorhynchus_mykiss	Steelhead	NA	5	0.0006	0.06	UBC	Thomas	dna_new_BC_2011-12-13.csv
Pv12.355	Cowichan Bay	48.7562	-123.6223	11	8	2012	Harbour seal	ONCNER	Oncorhynchus_nerka	Sockeye_Salmon	19	88	0.0099	0.99	UBC	Thomas	dna_new_BC_2011-12-13.csv
Pv12.355	Cowichan Bay	48.7562	-123.6223	11	8	2012	Harbour seal	ONCTSH	Oncorhynchus_tshawytscha	Chinook_Salmon	NA	14	0.0016	0.16	UBC	Thomas	dna_new_BC_2011-12-13.csv
Pv12.356	Cowichan Bay	48.7562	-123.6223	11	8	2012	Harbour seal	ALOSAP	Alosa_sapidissima	American_Shad	157	NA	0.0560	5.60	UBC	Thomas	dna_new_BC_2011-12-13.csv
Pv12.356	Cowichan Bay	48.7562	-123.6223	11	8	2012	Harbour seal	CLUPAL	Clupea_pallasii	Pacific_Herring	54	NA	0.0193	1.93	UBC	Thomas	dna_new_BC_2011-12-13.csv
Pv12.356	Cowichan Bay	48.7562	-123.6223	11	8	2012	Harbour seal	LOLOPA	Loligo_opalescens	California_Market_Squid	70	NA	0.0250	2.50	UBC	Thomas	dna_new_BC_2011-12-13.csv
Pv12.356	Cowichan Bay	48.7562	-123.6223	11	8	2012	Harbour seal	MICPRO	Microgadus_proximus	Pacific_Tomcod	48	NA	0.0171	1.71	UBC	Thomas	dna_new_BC_2011-12-13.csv
Pv12.356	Cowichan Bay	48.7562	-123.6223	11	8	2012	Harbour seal	ONCGOR	Oncorhynchus_gorbuscha	Pink_Salmon	2430	3403	0.7854	78.54	UBC	Thomas	dna_new_BC_2011-12-13.csv
Pv12.356	Cowichan Bay	48.7562	-123.6223	11	8	2012	Harbour seal	ONCNER	Oncorhynchus_nerka	Sockeye_Salmon	43	348	0.0803	8.03	UBC	Thomas	dna_new_BC_2011-12-13.csv
Pv12.356	Cowichan Bay	48.7562	-123.6223	11	8	2012	Harbour seal	ONCTSH	Oncorhynchus_tshawytscha	Chinook_Salmon	NA	73	0.0168	1.68	UBC	Thomas	dna_new_BC_2011-12-13.csv
Pv12.357	Cowichan Bay	48.7562	-123.6223	11	8	2012	Harbour seal	CLUPAL	Clupea_pallasii	Pacific_Herring	64	NA	0.1061	10.61	UBC	Thomas	dna_new_BC_2011-12-13.csv
Pv12.357	Cowichan Bay	48.7562	-123.6223	11	8	2012	Harbour seal	MERPRO	Merluccius_productus	Pacific_Hake	304	NA	0.5041	50.41	UBC	Thomas	dna_new_BC_2011-12-13.csv
Pv12.357	Cowichan Bay	48.7562	-123.6223	11	8	2012	Harbour seal	ONCNER	Oncorhynchus_nerka	Sockeye_Salmon	235	NA	0.3897	38.97	UBC	Thomas	dna_new_BC_2011-12-13.csv
Pv12.358	Cowichan Bay	48.7562	-123.6223	11	8	2012	Harbour seal	LAMAYR	Lampetra_ayresii	River_Lamprey	112	NA	0.1626	16.26	UBC	Thomas	dna_new_BC_2011-12-13.csv
Pv12.358	Cowichan Bay	48.7562	-123.6223	11	8	2012	Harbour seal	MERPRO	Merluccius_productus	Pacific_Hake	48	NA	0.0697	6.97	UBC	Thomas	dna_new_BC_2011-12-13.csv
Pv12.358	Cowichan Bay	48.7562	-123.6223	11	8	2012	Harbour seal	ONCGOR	Oncorhynchus_gorbuscha	Pink_Salmon	42	2	0.0161	1.61	UBC	Thomas	dna_new_BC_2011-12-13.csv
Pv12.358	Cowichan Bay	48.7562	-123.6223	11	8	2012	Harbour seal	ONCTSH	Oncorhynchus_tshawytscha	Chinook_Salmon	7	11	0.0884	8.84	UBC	Thomas	dna_new_BC_2011-12-13.csv
Pv12.358	Cowichan Bay	48.7562	-123.6223	11	8	2012	Harbour seal	GADCHA	Gadus_chalcogrammus	Walleye_Pollock	457	NA	0.6633	66.33	UBC	Thomas	dna_new_BC_2011-12-13.csv
Pv12.359	Cowichan Bay	48.7562	-123.6223	11	8	2012	Harbour seal	CLUPAL	Clupea_pallasii	Pacific_Herring	4	NA	0.0178	1.78	UBC	Thomas	dna_new_BC_2011-12-13.csv
Pv12.359	Cowichan Bay	48.7562	-123.6223	11	8	2012	Harbour seal	MERPRO	Merluccius_productus	Pacific_Hake	196	NA	0.8711	87.11	UBC	Thomas	dna_new_BC_2011-12-13.csv
Pv12.359	Cowichan Bay	48.7562	-123.6223	11	8	2012	Harbour seal	ONCGOR	Oncorhynchus_gorbuscha	Pink_Salmon	20	NA	0.0889	8.89	UBC	Thomas	dna_new_BC_2011-12-13.csv
Pv12.359	Cowichan Bay	48.7562	-123.6223	11	8	2012	Harbour seal	ONCNER	Oncorhynchus_nerka	Sockeye_Salmon	5	NA	0.0222	2.22	UBC	Thomas	dna_new_BC_2011-12-13.csv
Pv12.360	Cowichan Bay	48.7562	-123.6223	11	8	2012	Harbour seal	MERPRO	Merluccius_productus	Pacific_Hake	205	NA	0.2774	27.74	UBC	Thomas	dna_new_BC_2011-12-13.csv
Pv12.360	Cowichan Bay	48.7562	-123.6223	11	8	2012	Harbour seal	ONCNER	Oncorhynchus_nerka	Sockeye_Salmon	534	NA	0.7226	72.26	UBC	Thomas	dna_new_BC_2011-12-13.csv
Pv12.361	Cowichan Bay	48.7562	-123.6223	11	8	2012	Harbour seal	MERPRO	Merluccius_productus	Pacific_Hake	48	NA	0.1404	14.04	UBC	Thomas	dna_new_BC_2011-12-13.csv
Pv12.361	Cowichan Bay	48.7562	-123.6223	11	8	2012	Harbour seal	OPHELO	Ophiodon_elongatus	Lingcod	294	NA	0.8596	85.96	UBC	Thomas	dna_new_BC_2011-12-13.csv
Pv12.362	Fraser	49.1204	-123.2104	16	8	2012	Harbour seal	ONCNER	Oncorhynchus_nerka	Sockeye_Salmon	773	2837	0.9895	98.95	UBC	Thomas	dna_new_BC_2011-12-13.csv
Pv12.362	Fraser	49.1204	-123.2104	16	8	2012	Harbour seal	ONCTSH	Oncorhynchus_tshawytscha	Chinook_Salmon	NA	30	0.0105	1.05	UBC	Thomas	dna_new_BC_2011-12-13.csv
Pv12.363	Fraser	49.1204	-123.2104	16	8	2012	Harbour seal	ONCNER	Oncorhynchus_nerka	Sockeye_Salmon	1076	2661	1.0000	100.00	UBC	Thomas	dna_new_BC_2011-12-13.csv
Pv12.364	Fraser	49.1204	-123.2104	16	8	2012	Harbour seal	CLUPAL	Clupea_pallasii	Pacific_Herring	2	NA	0.0127	1.27	UBC	Thomas	dna_new_BC_2011-12-13.csv
Pv12.364	Fraser	49.1204	-123.2104	16	8	2012	Harbour seal	HIPSTE	Hippoglossus_stenolepis	Pacific_Halibut	13	NA	0.0823	8.23	UBC	Thomas	dna_new_BC_2011-12-13.csv
Pv12.364	Fraser	49.1204	-123.2104	16	8	2012	Harbour seal	ONCNER	Oncorhynchus_nerka	Sockeye_Salmon	82	1613	0.5081	50.81	UBC	Thomas	dna_new_BC_2011-12-13.csv
Pv12.364	Fraser	49.1204	-123.2104	16	8	2012	Harbour seal	ONCTSH	Oncorhynchus_tshawytscha	Chinook_Salmon	41	1220	0.3843	38.43	UBC	Thomas	dna_new_BC_2011-12-13.csv
Pv12.364	Fraser	49.1204	-123.2104	16	8	2012	Harbour seal	GADCHA	Gadus_chalcogrammus	Walleye_Pollock	2	NA	0.0127	1.27	UBC	Thomas	dna_new_BC_2011-12-13.csv
Pv12.365	Fraser	49.1204	-123.2104	16	8	2012	Harbour seal	ONCNER	Oncorhynchus_nerka	Sockeye_Salmon	576	2722	1.0000	100.00	UBC	Thomas	dna_new_BC_2011-12-13.csv
Pv12.366	Fraser	49.1204	-123.2104	16	8	2012	Harbour seal	ONCNER	Oncorhynchus_nerka	Sockeye_Salmon	1278	2309	1.0000	100.00	UBC	Thomas	dna_new_BC_2011-12-13.csv
Pv12.367	Fraser	49.1204	-123.2104	16	8	2012	Harbour seal	MERPRO	Merluccius_productus	Pacific_Hake	3	NA	0.0145	1.45	UBC	Thomas	dna_new_BC_2011-12-13.csv
Pv12.367	Fraser	49.1204	-123.2104	16	8	2012	Harbour seal	ONCGOR	Oncorhynchus_gorbuscha	Pink_Salmon	7	103	0.0382	3.82	UBC	Thomas	dna_new_BC_2011-12-13.csv
Pv12.367	Fraser	49.1204	-123.2104	16	8	2012	Harbour seal	ONCNER	Oncorhynchus_nerka	Sockeye_Salmon	181	2463	0.9135	91.35	UBC	Thomas	dna_new_BC_2011-12-13.csv
Pv12.367	Fraser	49.1204	-123.2104	16	8	2012	Harbour seal	GADCHA	Gadus_chalcogrammus	Walleye_Pollock	7	NA	0.0338	3.38	UBC	Thomas	dna_new_BC_2011-12-13.csv
Pv12.368	Fraser	49.1204	-123.2104	16	8	2012	Harbour seal	ONCNER	Oncorhynchus_nerka	Sockeye_Salmon	586	1977	0.9895	98.95	UBC	Thomas	dna_new_BC_2011-12-13.csv
Pv12.368	Fraser	49.1204	-123.2104	16	8	2012	Harbour seal	ONCTSH	Oncorhynchus_tshawytscha	Chinook_Salmon	NA	21	0.0105	1.05	UBC	Thomas	dna_new_BC_2011-12-13.csv
Pv12.369	Fraser	49.1204	-123.2104	16	8	2012	Harbour seal	ONCNER	Oncorhynchus_nerka	Sockeye_Salmon	287	1054	0.9850	98.50	UBC	Thomas	dna_new_BC_2011-12-13.csv
Pv12.369	Fraser	49.1204	-123.2104	16	8	2012	Harbour seal	ONCTSH	Oncorhynchus_tshawytscha	Chinook_Salmon	3	16	0.0150	1.50	UBC	Thomas	dna_new_BC_2011-12-13.csv
Pv12.370	Fraser	49.1204	-123.2104	16	8	2012	Harbour seal	CLUPAL	Clupea_pallasii	Pacific_Herring	1	NA	0.1000	10.00	UBC	Thomas	dna_new_BC_2011-12-13.csv
Pv12.370	Fraser	49.1204	-123.2104	16	8	2012	Harbour seal	MERPRO	Merluccius_productus	Pacific_Hake	1	NA	0.1000	10.00	UBC	Thomas	dna_new_BC_2011-12-13.csv
Pv12.370	Fraser	49.1204	-123.2104	16	8	2012	Harbour seal	ONCNER	Oncorhynchus_nerka	Sockeye_Salmon	6	NA	0.6000	60.00	UBC	Thomas	dna_new_BC_2011-12-13.csv
Pv12.370	Fraser	49.1204	-123.2104	16	8	2012	Harbour seal	GADCHA	Gadus_chalcogrammus	Walleye_Pollock	2	NA	0.2000	20.00	UBC	Thomas	dna_new_BC_2011-12-13.csv
Pv12.371	Fraser	49.1204	-123.2104	16	8	2012	Harbour seal	HYPPRE	Hypomesus_pretiosus	Surf_Smelt	1	NA	0.0175	1.75	UBC	Thomas	dna_new_BC_2011-12-13.csv
Pv12.371	Fraser	49.1204	-123.2104	16	8	2012	Harbour seal	ONCNER	Oncorhynchus_nerka	Sockeye_Salmon	54	440	0.9519	95.19	UBC	Thomas	dna_new_BC_2011-12-13.csv
Pv12.371	Fraser	49.1204	-123.2104	16	8	2012	Harbour seal	ONCTSH	Oncorhynchus_tshawytscha	Chinook_Salmon	1	6	0.0130	1.30	UBC	Thomas	dna_new_BC_2011-12-13.csv
Pv12.371	Fraser	49.1204	-123.2104	16	8	2012	Harbour seal	GADCHA	Gadus_chalcogrammus	Walleye_Pollock	1	NA	0.0175	1.75	UBC	Thomas	dna_new_BC_2011-12-13.csv
Pv12.373	Belle Chain	48.8323	-123.1984	24	8	2012	Harbour seal	ONCTSH	Oncorhynchus_tshawytscha	Chinook_Salmon	566	2602	1.0000	100.00	UBC	Thomas	dna_new_BC_2011-12-13.csv
Pv12.374	Belle Chain	48.8323	-123.1984	24	8	2012	Harbour seal	ONCCLA	Oncorhynchus_clarkii	Cutthroat_Trout	NA	66	0.0268	2.68	UBC	Thomas	dna_new_BC_2011-12-13.csv
Pv12.374	Belle Chain	48.8323	-123.1984	24	8	2012	Harbour seal	ONCTSH	Oncorhynchus_tshawytscha	Chinook_Salmon	60	605	0.2458	24.58	UBC	Thomas	dna_new_BC_2011-12-13.csv
Pv12.374	Belle Chain	48.8323	-123.1984	24	8	2012	Harbour seal	CLUPAL	Clupea_pallasii	Pacific_Herring	18	NA	0.0460	4.60	UBC	Thomas	dna_new_BC_2011-12-13.csv
Pv12.374	Belle Chain	48.8323	-123.1984	24	8	2012	Harbour seal	ONCNER	Oncorhynchus_nerka	Sockeye_Salmon	313	1677	0.6813	68.13	UBC	Thomas	dna_new_BC_2011-12-13.csv
Pv12.375	Belle Chain	48.8323	-123.1984	24	8	2012	Harbour seal	ONCNER	Oncorhynchus_nerka	Sockeye_Salmon	104	612	0.2484	24.84	UBC	Thomas	dna_new_BC_2011-12-13.csv
Pv12.375	Belle Chain	48.8323	-123.1984	24	8	2012	Harbour seal	ONCTSH	Oncorhynchus_tshawytscha	Chinook_Salmon	172	1779	0.7220	72.20	UBC	Thomas	dna_new_BC_2011-12-13.csv
Pv12.375	Belle Chain	48.8323	-123.1984	24	8	2012	Harbour seal	ONCCLA	Oncorhynchus_clarkii	Cutthroat_Trout	NA	73	0.0296	2.96	UBC	Thomas	dna_new_BC_2011-12-13.csv
Pv12.376	Belle Chain	48.8323	-123.1984	24	8	2012	Harbour seal	ONCNER	Oncorhynchus_nerka	Sockeye_Salmon	305	980	0.3433	34.33	UBC	Thomas	dna_new_BC_2011-12-13.csv
Pv12.376	Belle Chain	48.8323	-123.1984	24	8	2012	Harbour seal	ONCTSH	Oncorhynchus_tshawytscha	Chinook_Salmon	209	1571	0.5503	55.03	UBC	Thomas	dna_new_BC_2011-12-13.csv
Pv12.376	Belle Chain	48.8323	-123.1984	24	8	2012	Harbour seal	CLUPAL	Clupea_pallasii	Pacific_Herring	17	NA	0.0301	3.01	UBC	Thomas	dna_new_BC_2011-12-13.csv
Pv12.376	Belle Chain	48.8323	-123.1984	24	8	2012	Harbour seal	ONCCLA	Oncorhynchus_clarkii	Cutthroat_Trout	NA	53	0.0186	1.86	UBC	Thomas	dna_new_BC_2011-12-13.csv
Pv12.376	Belle Chain	48.8323	-123.1984	24	8	2012	Harbour seal	ONCKIS	Oncorhynchus_kisutch	Coho_Salmon	33	165	0.0578	5.78	UBC	Thomas	dna_new_BC_2011-12-13.csv
Pv12.377	Belle Chain	48.8323	-123.1984	24	8	2012	Harbour seal	GADCHA	Gadus_chalcogrammus	Walleye_Pollock	3	NA	0.0115	1.15	UBC	Thomas	dna_new_BC_2011-12-13.csv
Pv12.377	Belle Chain	48.8323	-123.1984	24	8	2012	Harbour seal	ONCTSH	Oncorhynchus_tshawytscha	Chinook_Salmon	252	2452	0.9885	98.85	UBC	Thomas	dna_new_BC_2011-12-13.csv
Pv12.378	Belle Chain	48.8323	-123.1984	24	8	2012	Harbour seal	ONCNER	Oncorhynchus_nerka	Sockeye_Salmon	NA	4	0.0145	1.45	UBC	Thomas	dna_new_BC_2011-12-13.csv
Pv12.378	Belle Chain	48.8323	-123.1984	24	8	2012	Harbour seal	GADCHA	Gadus_chalcogrammus	Walleye_Pollock	53	NA	0.9636	96.36	UBC	Thomas	dna_new_BC_2011-12-13.csv
Pv12.378	Belle Chain	48.8323	-123.1984	24	8	2012	Harbour seal	CLUPAL	Clupea_pallasii	Pacific_Herring	1	NA	0.0182	1.82	UBC	Thomas	dna_new_BC_2011-12-13.csv
Pv12.378	Belle Chain	48.8323	-123.1984	24	8	2012	Harbour seal	ONCKIS	Oncorhynchus_kisutch	Coho_Salmon	NA	1	0.0036	0.36	UBC	Thomas	dna_new_BC_2011-12-13.csv
Pv12.379	Belle Chain	48.8323	-123.1984	24	8	2012	Harbour seal	ONCTSH	Oncorhynchus_tshawytscha	Chinook_Salmon	337	2713	1.0000	100.00	UBC	Thomas	dna_new_BC_2011-12-13.csv
Pv12.381	Belle Chain	48.8323	-123.1984	24	8	2012	Harbour seal	CLUPAL	Clupea_pallasii	Pacific_Herring	34	NA	0.8095	80.95	UBC	Thomas	dna_new_BC_2011-12-13.csv
Pv12.381	Belle Chain	48.8323	-123.1984	24	8	2012	Harbour seal	MERPRO	Merluccius_productus	Pacific_Hake	1	NA	0.0238	2.38	UBC	Thomas	dna_new_BC_2011-12-13.csv
Pv12.381	Belle Chain	48.8323	-123.1984	24	8	2012	Harbour seal	ONCGOR	Oncorhynchus_gorbuscha	Pink_Salmon	NA	1	0.0159	1.59	UBC	Thomas	dna_new_BC_2011-12-13.csv
Pv12.381	Belle Chain	48.8323	-123.1984	24	8	2012	Harbour seal	ONCNER	Oncorhynchus_nerka	Sockeye_Salmon	2	5	0.0794	7.94	UBC	Thomas	dna_new_BC_2011-12-13.csv
Pv12.381	Belle Chain	48.8323	-123.1984	24	8	2012	Harbour seal	ONCTSH	Oncorhynchus_tshawytscha	Chinook_Salmon	4	3	0.0476	4.76	UBC	Thomas	dna_new_BC_2011-12-13.csv
Pv12.381	Belle Chain	48.8323	-123.1984	24	8	2012	Harbour seal	GADCHA	Gadus_chalcogrammus	Walleye_Pollock	1	NA	0.0238	2.38	UBC	Thomas	dna_new_BC_2011-12-13.csv
Pv12.383	Belle Chain	48.8323	-123.1984	24	8	2012	Harbour seal	GADCHA	Gadus_chalcogrammus	Walleye_Pollock	729	NA	1.0000	100.00	UBC	Thomas	dna_new_BC_2011-12-13.csv
Pv12.384	Belle Chain	48.8323	-123.1984	24	8	2012	Harbour seal	CRYGIG	Cryptacanthodes_giganteus	Giant_Wrymouth	2	NA	0.0189	1.89	UBC	Thomas	dna_new_BC_2011-12-13.csv
Pv12.384	Belle Chain	48.8323	-123.1984	24	8	2012	Harbour seal	LEPARM	Leptocottus_armatus	Pacific_Staghorn_Sculpin	8	NA	0.0755	7.55	UBC	Thomas	dna_new_BC_2011-12-13.csv
Pv12.384	Belle Chain	48.8323	-123.1984	24	8	2012	Harbour seal	ONCNER	Oncorhynchus_nerka	Sockeye_Salmon	2	NA	0.0189	1.89	UBC	Thomas	dna_new_BC_2011-12-13.csv
Pv12.384	Belle Chain	48.8323	-123.1984	24	8	2012	Harbour seal	GADCHA	Gadus_chalcogrammus	Walleye_Pollock	94	NA	0.8868	88.68	UBC	Thomas	dna_new_BC_2011-12-13.csv
Pv12.385	Belle Chain	48.8323	-123.1984	24	8	2012	Harbour seal	CLUPAL	Clupea_pallasii	Pacific_Herring	74	NA	0.9487	94.87	UBC	Thomas	dna_new_BC_2011-12-13.csv
Pv12.385	Belle Chain	48.8323	-123.1984	24	8	2012	Harbour seal	ONCNER	Oncorhynchus_nerka	Sockeye_Salmon	1	NA	0.0128	1.28	UBC	Thomas	dna_new_BC_2011-12-13.csv
Pv12.385	Belle Chain	48.8323	-123.1984	24	8	2012	Harbour seal	GADCHA	Gadus_chalcogrammus	Walleye_Pollock	3	NA	0.0385	3.85	UBC	Thomas	dna_new_BC_2011-12-13.csv
Pv12.386	Belle Chain	48.8323	-123.1984	24	8	2012	Harbour seal	GADCHA	Gadus_chalcogrammus	Walleye_Pollock	391	NA	1.0000	100.00	UBC	Thomas	dna_new_BC_2011-12-13.csv
Pv12.387	Belle Chain	48.8323	-123.1984	24	8	2012	Harbour seal	CLUPAL	Clupea_pallasii	Pacific_Herring	2	NA	0.1053	10.53	UBC	Thomas	dna_new_BC_2011-12-13.csv
Pv12.387	Belle Chain	48.8323	-123.1984	24	8	2012	Harbour seal	MERPRO	Merluccius_productus	Pacific_Hake	1	NA	0.0526	5.26	UBC	Thomas	dna_new_BC_2011-12-13.csv
Pv12.387	Belle Chain	48.8323	-123.1984	24	8	2012	Harbour seal	ONCNER	Oncorhynchus_nerka	Sockeye_Salmon	6	NA	0.3158	31.58	UBC	Thomas	dna_new_BC_2011-12-13.csv
Pv12.387	Belle Chain	48.8323	-123.1984	24	8	2012	Harbour seal	ONCTSH	Oncorhynchus_tshawytscha	Chinook_Salmon	3	NA	0.1579	15.79	UBC	Thomas	dna_new_BC_2011-12-13.csv
Pv12.387	Belle Chain	48.8323	-123.1984	24	8	2012	Harbour seal	OPHELO	Ophiodon_elongatus	Lingcod	2	NA	0.1053	10.53	UBC	Thomas	dna_new_BC_2011-12-13.csv
Pv12.387	Belle Chain	48.8323	-123.1984	24	8	2012	Harbour seal	GADCHA	Gadus_chalcogrammus	Walleye_Pollock	5	NA	0.2632	26.32	UBC	Thomas	dna_new_BC_2011-12-13.csv
Pv12.388	Belle Chain	48.8323	-123.1984	24	8	2012	Harbour seal	HYPPRE	Hypomesus_pretiosus	Surf_Smelt	73	NA	0.2561	25.61	UBC	Thomas	dna_new_BC_2011-12-13.csv
Pv12.388	Belle Chain	48.8323	-123.1984	24	8	2012	Harbour seal	ONCKIS	Oncorhynchus_kisutch	Coho_Salmon	10	274	0.1163	11.63	UBC	Thomas	dna_new_BC_2011-12-13.csv
Pv12.388	Belle Chain	48.8323	-123.1984	24	8	2012	Harbour seal	ONCNER	Oncorhynchus_nerka	Sockeye_Salmon	156	496	0.2105	21.05	UBC	Thomas	dna_new_BC_2011-12-13.csv
Pv12.388	Belle Chain	48.8323	-123.1984	24	8	2012	Harbour seal	ONCTSH	Oncorhynchus_tshawytscha	Chinook_Salmon	23	983	0.4171	41.71	UBC	Thomas	dna_new_BC_2011-12-13.csv
Pv12.390	Belle Chain	48.8323	-123.1984	24	8	2012	Harbour seal	GADCHA	Gadus_chalcogrammus	Walleye_Pollock	346	NA	1.0000	100.00	UBC	Thomas	dna_new_BC_2011-12-13.csv
Pv12.391	Belle Chain	48.8323	-123.1984	24	8	2012	Harbour seal	ONCMYK	Oncorhynchus_mykiss	Steelhead	NA	1	0.0014	0.14	UBC	Thomas	dna_new_BC_2011-12-13.csv
Pv12.391	Belle Chain	48.8323	-123.1984	24	8	2012	Harbour seal	ONCNER	Oncorhynchus_nerka	Sockeye_Salmon	2	1	0.0014	0.14	UBC	Thomas	dna_new_BC_2011-12-13.csv
Pv12.391	Belle Chain	48.8323	-123.1984	24	8	2012	Harbour seal	ONCTSH	Oncorhynchus_tshawytscha	Chinook_Salmon	NA	6	0.0082	0.82	UBC	Thomas	dna_new_BC_2011-12-13.csv
Pv12.391	Belle Chain	48.8323	-123.1984	24	8	2012	Harbour seal	CLUPAL	Clupea_pallasii	Pacific_Herring	128	NA	0.9624	96.24	UBC	Thomas	dna_new_BC_2011-12-13.csv
Pv12.391	Belle Chain	48.8323	-123.1984	24	8	2012	Harbour seal	MERPRO	Merluccius_productus	Pacific_Hake	3	NA	0.0226	2.26	UBC	Thomas	dna_new_BC_2011-12-13.csv
Pv12.391	Belle Chain	48.8323	-123.1984	24	8	2012	Harbour seal	ONCKET	Oncorhynchus_keta	Chum_Salmon	NA	1	0.0014	0.14	UBC	Thomas	dna_new_BC_2011-12-13.csv
Pv12.391	Belle Chain	48.8323	-123.1984	24	8	2012	Harbour seal	ONCKIS	Oncorhynchus_kisutch	Coho_Salmon	NA	2	0.0027	0.27	UBC	Thomas	dna_new_BC_2011-12-13.csv
Pv12.392	Belle Chain	48.8323	-123.1984	24	8	2012	Harbour seal	CLUPAL	Clupea_pallasii	Pacific_Herring	43	NA	0.0393	3.93	UBC	Thomas	dna_new_BC_2011-12-13.csv
Pv12.392	Belle Chain	48.8323	-123.1984	24	8	2012	Harbour seal	LAMAYR	Lampetra_ayresii	River_Lamprey	126	NA	0.1151	11.51	UBC	Thomas	dna_new_BC_2011-12-13.csv
Pv12.392	Belle Chain	48.8323	-123.1984	24	8	2012	Harbour seal	GADCHA	Gadus_chalcogrammus	Walleye_Pollock	875	NA	0.7991	79.91	UBC	Thomas	dna_new_BC_2011-12-13.csv
Pv12.392	Belle Chain	48.8323	-123.1984	24	8	2012	Harbour seal	ALOSAP	Alosa_sapidissima	American_Shad	51	NA	0.0466	4.66	UBC	Thomas	dna_new_BC_2011-12-13.csv
Pv12.393	Belle Chain	48.8323	-123.1984	24	8	2012	Harbour seal	CLUPAL	Clupea_pallasii	Pacific_Herring	477	NA	0.9876	98.76	UBC	Thomas	dna_new_BC_2011-12-13.csv
Pv12.393	Belle Chain	48.8323	-123.1984	24	8	2012	Harbour seal	GADCHA	Gadus_chalcogrammus	Walleye_Pollock	6	NA	0.0124	1.24	UBC	Thomas	dna_new_BC_2011-12-13.csv
Pv12.395	Belle Chain	48.8323	-123.1984	24	8	2012	Harbour seal	CLUPAL	Clupea_pallasii	Pacific_Herring	272	NA	0.9714	97.14	UBC	Thomas	dna_new_BC_2011-12-13.csv
Pv12.395	Belle Chain	48.8323	-123.1984	24	8	2012	Harbour seal	ONCNER	Oncorhynchus_nerka	Sockeye_Salmon	NA	3	0.0095	0.95	UBC	Thomas	dna_new_BC_2011-12-13.csv
Pv12.395	Belle Chain	48.8323	-123.1984	24	8	2012	Harbour seal	ONCTSH	Oncorhynchus_tshawytscha	Chinook_Salmon	8	6	0.0190	1.90	UBC	Thomas	dna_new_BC_2011-12-13.csv
Pv12.396	Belle Chain	48.8323	-123.1984	24	8	2012	Harbour seal	ONCKIS	Oncorhynchus_kisutch	Coho_Salmon	9	302	0.1070	10.70	UBC	Thomas	dna_new_BC_2011-12-13.csv
Pv12.396	Belle Chain	48.8323	-123.1984	24	8	2012	Harbour seal	ONCTSH	Oncorhynchus_tshawytscha	Chinook_Salmon	145	2380	0.8433	84.33	UBC	Thomas	dna_new_BC_2011-12-13.csv
Pv12.396	Belle Chain	48.8323	-123.1984	24	8	2012	Harbour seal	GADCHA	Gadus_chalcogrammus	Walleye_Pollock	3	NA	0.0170	1.70	UBC	Thomas	dna_new_BC_2011-12-13.csv
Pv12.396	Belle Chain	48.8323	-123.1984	24	8	2012	Harbour seal	CLUPAL	Clupea_pallasii	Pacific_Herring	2	NA	0.0114	1.14	UBC	Thomas	dna_new_BC_2011-12-13.csv
Pv12.396	Belle Chain	48.8323	-123.1984	24	8	2012	Harbour seal	ONCGOR	Oncorhynchus_gorbuscha	Pink_Salmon	NA	60	0.0213	2.13	UBC	Thomas	dna_new_BC_2011-12-13.csv
Pv12.397	Belle Chain	48.8323	-123.1984	24	8	2012	Harbour seal	CLUPAL	Clupea_pallasii	Pacific_Herring	5	NA	0.0123	1.23	UBC	Thomas	dna_new_BC_2011-12-13.csv
Pv12.397	Belle Chain	48.8323	-123.1984	24	8	2012	Harbour seal	ONCTSH	Oncorhynchus_tshawytscha	Chinook_Salmon	NA	14	0.0004	0.04	UBC	Thomas	dna_new_BC_2011-12-13.csv
Pv12.397	Belle Chain	48.8323	-123.1984	24	8	2012	Harbour seal	GADCHA	Gadus_chalcogrammus	Walleye_Pollock	398	NA	0.9755	97.55	UBC	Thomas	dna_new_BC_2011-12-13.csv
Pv12.397	Belle Chain	48.8323	-123.1984	24	8	2012	Harbour seal	ONCGOR	Oncorhynchus_gorbuscha	Pink_Salmon	NA	467	0.0118	1.18	UBC	Thomas	dna_new_BC_2011-12-13.csv
Pv12.397	Belle Chain	48.8323	-123.1984	24	8	2012	Harbour seal	ONCNER	Oncorhynchus_nerka	Sockeye_Salmon	5	6	0.0002	0.02	UBC	Thomas	dna_new_BC_2011-12-13.csv
Pv12.398	Belle Chain	48.8323	-123.1984	24	8	2012	Harbour seal	CLUPAL	Clupea_pallasii	Pacific_Herring	274	NA	0.8035	80.35	UBC	Thomas	dna_new_BC_2011-12-13.csv
Pv12.398	Belle Chain	48.8323	-123.1984	24	8	2012	Harbour seal	ONCTSH	Oncorhynchus_tshawytscha	Chinook_Salmon	51	1178	0.1965	19.65	UBC	Thomas	dna_new_BC_2011-12-13.csv
Pv12.399	Belle Chain	48.8323	-123.1984	24	8	2012	Harbour seal	ONCTSH	Oncorhynchus_tshawytscha	Chinook_Salmon	95	1279	0.4077	40.77	UBC	Thomas	dna_new_BC_2011-12-13.csv
Pv12.399	Belle Chain	48.8323	-123.1984	24	8	2012	Harbour seal	ONCNER	Oncorhynchus_nerka	Sockeye_Salmon	546	1858	0.5923	59.23	UBC	Thomas	dna_new_BC_2011-12-13.csv
Pv12.400	Belle Chain	48.8323	-123.1984	24	8	2012	Harbour seal	GADCHA	Gadus_chalcogrammus	Walleye_Pollock	3	NA	0.2500	25.00	UBC	Thomas	dna_new_BC_2011-12-13.csv
Pv12.400	Belle Chain	48.8323	-123.1984	24	8	2012	Harbour seal	ONCTSH	Oncorhynchus_tshawytscha	Chinook_Salmon	1	NA	0.0833	8.33	UBC	Thomas	dna_new_BC_2011-12-13.csv
Pv12.400	Belle Chain	48.8323	-123.1984	24	8	2012	Harbour seal	OPHELO	Ophiodon_elongatus	Lingcod	1	NA	0.0833	8.33	UBC	Thomas	dna_new_BC_2011-12-13.csv
Pv12.400	Belle Chain	48.8323	-123.1984	24	8	2012	Harbour seal	CLUPAL	Clupea_pallasii	Pacific_Herring	1	NA	0.0833	8.33	UBC	Thomas	dna_new_BC_2011-12-13.csv
Pv12.400	Belle Chain	48.8323	-123.1984	24	8	2012	Harbour seal	LAMAYR	Lampetra_ayresii	River_Lamprey	1	NA	0.0833	8.33	UBC	Thomas	dna_new_BC_2011-12-13.csv
Pv12.400	Belle Chain	48.8323	-123.1984	24	8	2012	Harbour seal	MERPRO	Merluccius_productus	Pacific_Hake	2	NA	0.1667	16.67	UBC	Thomas	dna_new_BC_2011-12-13.csv
Pv12.400	Belle Chain	48.8323	-123.1984	24	8	2012	Harbour seal	ONCNER	Oncorhynchus_nerka	Sockeye_Salmon	1	NA	0.0833	8.33	UBC	Thomas	dna_new_BC_2011-12-13.csv
Pv12.400	Belle Chain	48.8323	-123.1984	24	8	2012	Harbour seal	ONCGOR	Oncorhynchus_gorbuscha	Pink_Salmon	2	NA	0.1667	16.67	UBC	Thomas	dna_new_BC_2011-12-13.csv
Pv12.401	Belle Chain	48.8323	-123.1984	24	8	2012	Harbour seal	ONCTSH	Oncorhynchus_tshawytscha	Chinook_Salmon	1099	2457	1.0000	100.00	UBC	Thomas	dna_new_BC_2011-12-13.csv
Pv12.403	Fraser	49.1204	-123.2104	1	9	2012	Harbour seal	ONCNER	Oncorhynchus_nerka	Sockeye_Salmon	595	2579	0.9110	91.10	UBC	Thomas	dna_new_BC_2011-12-13.csv
Pv12.403	Fraser	49.1204	-123.2104	1	9	2012	Harbour seal	ONCTSH	Oncorhynchus_tshawytscha	Chinook_Salmon	22	252	0.0890	8.90	UBC	Thomas	dna_new_BC_2011-12-13.csv
Pv12.404	Fraser	49.1204	-123.2104	1	9	2012	Harbour seal	MERPRO	Merluccius_productus	Pacific_Hake	72	NA	0.0954	9.54	UBC	Thomas	dna_new_BC_2011-12-13.csv
Pv12.404	Fraser	49.1204	-123.2104	1	9	2012	Harbour seal	ONCTSH	Oncorhynchus_tshawytscha	Chinook_Salmon	111	3519	0.6702	67.02	UBC	Thomas	dna_new_BC_2011-12-13.csv
Pv12.404	Fraser	49.1204	-123.2104	1	9	2012	Harbour seal	GADCHA	Gadus_chalcogrammus	Walleye_Pollock	177	NA	0.2344	23.44	UBC	Thomas	dna_new_BC_2011-12-13.csv
Pv12.405	Fraser	49.1204	-123.2104	1	9	2012	Harbour seal	ONCNER	Oncorhynchus_nerka	Sockeye_Salmon	2	31	0.0103	1.03	UBC	Thomas	dna_new_BC_2011-12-13.csv
Pv12.405	Fraser	49.1204	-123.2104	1	9	2012	Harbour seal	ONCTSH	Oncorhynchus_tshawytscha	Chinook_Salmon	117	2972	0.9897	98.97	UBC	Thomas	dna_new_BC_2011-12-13.csv
Pv12.406	Fraser	49.1204	-123.2104	1	9	2012	Harbour seal	ONCNER	Oncorhynchus_nerka	Sockeye_Salmon	2	5	0.0078	0.78	UBC	Thomas	dna_new_BC_2011-12-13.csv
Pv12.406	Fraser	49.1204	-123.2104	1	9	2012	Harbour seal	ONCTSH	Oncorhynchus_tshawytscha	Chinook_Salmon	3	17	0.0266	2.66	UBC	Thomas	dna_new_BC_2011-12-13.csv
Pv12.406	Fraser	49.1204	-123.2104	1	9	2012	Harbour seal	PARVET	Parophrys_vetulus	English_Sole	14	NA	0.0966	9.66	UBC	Thomas	dna_new_BC_2011-12-13.csv
Pv12.406	Fraser	49.1204	-123.2104	1	9	2012	Harbour seal	NA	Lepidopsetta_bilineata_OR_ Platichthys_stellatus	Rock_Sole_OR_Starry_Flounder	126	NA	0.8690	86.90	UBC	Thomas	dna_new_BC_2011-12-13.csv
Pv12.407	Fraser	49.1204	-123.2104	1	9	2012	Harbour seal	LEUSCH	Leuroglossus_schmidti	Northern_Smoothtongue	1	NA	0.0370	3.70	UBC	Thomas	dna_new_BC_2011-12-13.csv
Pv12.407	Fraser	49.1204	-123.2104	1	9	2012	Harbour seal	MERPRO	Merluccius_productus	Pacific_Hake	1	NA	0.0370	3.70	UBC	Thomas	dna_new_BC_2011-12-13.csv
Pv12.407	Fraser	49.1204	-123.2104	1	9	2012	Harbour seal	ONCTSH	Oncorhynchus_tshawytscha	Chinook_Salmon	22	2763	0.9259	92.59	UBC	Thomas	dna_new_BC_2011-12-13.csv
Pv12.408	Fraser	49.1204	-123.2104	1	9	2012	Harbour seal	ONCTSH	Oncorhynchus_tshawytscha	Chinook_Salmon	259	3274	1.0000	100.00	UBC	Thomas	dna_new_BC_2011-12-13.csv
Pv12.409	Fraser	49.1204	-123.2104	1	9	2012	Harbour seal	ONCNER	Oncorhynchus_nerka	Sockeye_Salmon	357	387	0.1212	12.12	UBC	Thomas	dna_new_BC_2011-12-13.csv
Pv12.409	Fraser	49.1204	-123.2104	1	9	2012	Harbour seal	ONCTSH	Oncorhynchus_tshawytscha	Chinook_Salmon	718	2807	0.8788	87.88	UBC	Thomas	dna_new_BC_2011-12-13.csv
Pv12.410	Fraser	49.1204	-123.2104	1	9	2012	Harbour seal	ONCKIS	Oncorhynchus_kisutch	Coho_Salmon	NA	49	0.0163	1.63	UBC	Thomas	dna_new_BC_2011-12-13.csv
Pv12.410	Fraser	49.1204	-123.2104	1	9	2012	Harbour seal	ONCTSH	Oncorhynchus_tshawytscha	Chinook_Salmon	293	2959	0.9837	98.37	UBC	Thomas	dna_new_BC_2011-12-13.csv
Pv12.411	Fraser	49.1204	-123.2104	1	9	2012	Harbour seal	ONCTSH	Oncorhynchus_tshawytscha	Chinook_Salmon	802	5666	1.0000	100.00	UBC	Thomas	dna_new_BC_2011-12-13.csv
Pv12.412	Fraser	49.1204	-123.2104	1	9	2012	Harbour seal	ONCNER	Oncorhynchus_nerka	Sockeye_Salmon	119	1802	0.9675	96.75	UBC	Thomas	dna_new_BC_2011-12-13.csv
Pv12.412	Fraser	49.1204	-123.2104	1	9	2012	Harbour seal	GADCHA	Gadus_chalcogrammus	Walleye_Pollock	4	NA	0.0325	3.25	UBC	Thomas	dna_new_BC_2011-12-13.csv
Pv12.413	Fraser	49.1204	-123.2104	1	9	2012	Harbour seal	CLUPAL	Clupea_pallasii	Pacific_Herring	1	NA	0.0108	1.08	UBC	Thomas	dna_new_BC_2011-12-13.csv
Pv12.413	Fraser	49.1204	-123.2104	1	9	2012	Harbour seal	MERPRO	Merluccius_productus	Pacific_Hake	1	NA	0.0108	1.08	UBC	Thomas	dna_new_BC_2011-12-13.csv
Pv12.413	Fraser	49.1204	-123.2104	1	9	2012	Harbour seal	ONCTSH	Oncorhynchus_tshawytscha	Chinook_Salmon	82	946	0.9570	95.70	UBC	Thomas	dna_new_BC_2011-12-13.csv
Pv12.413	Fraser	49.1204	-123.2104	1	9	2012	Harbour seal	GADCHA	Gadus_chalcogrammus	Walleye_Pollock	2	NA	0.0215	2.15	UBC	Thomas	dna_new_BC_2011-12-13.csv
Pv12.414	Fraser	49.1204	-123.2104	1	9	2012	Harbour seal	ONCTSH	Oncorhynchus_tshawytscha	Chinook_Salmon	489	2670	1.0000	100.00	UBC	Thomas	dna_new_BC_2011-12-13.csv
Pv12.415	Fraser	49.1204	-123.2104	1	9	2012	Harbour seal	ONCTSH	Oncorhynchus_tshawytscha	Chinook_Salmon	230	4202	1.0000	100.00	UBC	Thomas	dna_new_BC_2011-12-13.csv
Pv12.416	Fraser	49.1204	-123.2104	1	9	2012	Harbour seal	ONCNER	Oncorhynchus_nerka	Sockeye_Salmon	645	3061	0.9823	98.23	UBC	Thomas	dna_new_BC_2011-12-13.csv
Pv12.416	Fraser	49.1204	-123.2104	1	9	2012	Harbour seal	ONCTSH	Oncorhynchus_tshawytscha	Chinook_Salmon	23	55	0.0177	1.77	UBC	Thomas	dna_new_BC_2011-12-13.csv
Pv12.417	Fraser	49.1204	-123.2104	1	9	2012	Harbour seal	ONCNER	Oncorhynchus_nerka	Sockeye_Salmon	444	1193	0.2087	20.87	UBC	Thomas	dna_new_BC_2011-12-13.csv
Pv12.417	Fraser	49.1204	-123.2104	1	9	2012	Harbour seal	ONCTSH	Oncorhynchus_tshawytscha	Chinook_Salmon	709	4524	0.7913	79.13	UBC	Thomas	dna_new_BC_2011-12-13.csv
Pv12.418	Fraser	49.1204	-123.2104	1	9	2012	Harbour seal	ONCNER	Oncorhynchus_nerka	Sockeye_Salmon	739	3355	1.0000	100.00	UBC	Thomas	dna_new_BC_2011-12-13.csv
Pv12.419	Fraser	49.1204	-123.2104	1	9	2012	Harbour seal	ONCNER	Oncorhynchus_nerka	Sockeye_Salmon	855	2677	0.9893	98.93	UBC	Thomas	dna_new_BC_2011-12-13.csv
Pv12.419	Fraser	49.1204	-123.2104	1	9	2012	Harbour seal	ONCTSH	Oncorhynchus_tshawytscha	Chinook_Salmon	NA	29	0.0107	1.07	UBC	Thomas	dna_new_BC_2011-12-13.csv
Pv12.420	Fraser	49.1204	-123.2104	1	9	2012	Harbour seal	ONCNER	Oncorhynchus_nerka	Sockeye_Salmon	364	2835	0.9854	98.54	UBC	Thomas	dna_new_BC_2011-12-13.csv
Pv12.420	Fraser	49.1204	-123.2104	1	9	2012	Harbour seal	ONCTSH	Oncorhynchus_tshawytscha	Chinook_Salmon	NA	42	0.0146	1.46	UBC	Thomas	dna_new_BC_2011-12-13.csv
Pv12.422	Fraser	49.1204	-123.2104	1	9	2012	Harbour seal	LEPARM	Leptocottus_armatus	Pacific_Staghorn_Sculpin	20	NA	0.8333	83.33	UBC	Thomas	dna_new_BC_2011-12-13.csv
Pv12.422	Fraser	49.1204	-123.2104	1	9	2012	Harbour seal	CLUPAL	Clupea_pallasii	Pacific_Herring	1	NA	0.0417	4.17	UBC	Thomas	dna_new_BC_2011-12-13.csv
Pv12.422	Fraser	49.1204	-123.2104	1	9	2012	Harbour seal	ONCGOR	Oncorhynchus_gorbuscha	Pink_Salmon	NA	443	0.0808	8.08	UBC	Thomas	dna_new_BC_2011-12-13.csv
Pv12.422	Fraser	49.1204	-123.2104	1	9	2012	Harbour seal	ONCKET	Oncorhynchus_keta	Chum_Salmon	1	233	0.0425	4.25	UBC	Thomas	dna_new_BC_2011-12-13.csv
Pv12.422	Fraser	49.1204	-123.2104	1	9	2012	Harbour seal	ONCTSH	Oncorhynchus_tshawytscha	Chinook_Salmon	1	9	0.0016	0.16	UBC	Thomas	dna_new_BC_2011-12-13.csv
Pv12.423	Fraser	49.1204	-123.2104	1	9	2012	Harbour seal	ONCTSH	Oncorhynchus_tshawytscha	Chinook_Salmon	170	2861	1.0000	100.00	UBC	Thomas	dna_new_BC_2011-12-13.csv
Pv12.424	Fraser	49.1204	-123.2104	1	9	2012	Harbour seal	CLUPAL	Clupea_pallasii	Pacific_Herring	3	NA	0.0128	1.28	UBC	Thomas	dna_new_BC_2011-12-13.csv
Pv12.424	Fraser	49.1204	-123.2104	1	9	2012	Harbour seal	ONCGOR	Oncorhynchus_gorbuscha	Pink_Salmon	NA	146	0.0626	6.26	UBC	Thomas	dna_new_BC_2011-12-13.csv
Pv12.424	Fraser	49.1204	-123.2104	1	9	2012	Harbour seal	ONCKET	Oncorhynchus_keta	Chum_Salmon	148	912	0.3908	39.08	UBC	Thomas	dna_new_BC_2011-12-13.csv
Pv12.424	Fraser	49.1204	-123.2104	1	9	2012	Harbour seal	ONCNER	Oncorhynchus_nerka	Sockeye_Salmon	83	1246	0.5339	53.39	UBC	Thomas	dna_new_BC_2011-12-13.csv
Pv12.425	Fraser	49.1204	-123.2104	1	9	2012	Harbour seal	LAMAYR	Lampetra_ayresii	River_Lamprey	1	NA	0.0122	1.22	UBC	Thomas	dna_new_BC_2011-12-13.csv
Pv12.425	Fraser	49.1204	-123.2104	1	9	2012	Harbour seal	LEPARM	Leptocottus_armatus	Pacific_Staghorn_Sculpin	1	NA	0.0122	1.22	UBC	Thomas	dna_new_BC_2011-12-13.csv
Pv12.425	Fraser	49.1204	-123.2104	1	9	2012	Harbour seal	ONCTSH	Oncorhynchus_tshawytscha	Chinook_Salmon	76	2305	0.9512	95.12	UBC	Thomas	dna_new_BC_2011-12-13.csv
Pv12.425	Fraser	49.1204	-123.2104	1	9	2012	Harbour seal	OPHELO	Ophiodon_elongatus	Lingcod	1	NA	0.0122	1.22	UBC	Thomas	dna_new_BC_2011-12-13.csv
Pv12.425	Fraser	49.1204	-123.2104	1	9	2012	Harbour seal	GADCHA	Gadus_chalcogrammus	Walleye_Pollock	1	NA	0.0122	1.22	UBC	Thomas	dna_new_BC_2011-12-13.csv
Pv12.426	Fraser	49.1204	-123.2104	1	9	2012	Harbour seal	ONCTSH	Oncorhynchus_tshawytscha	Chinook_Salmon	258	2428	1.0000	100.00	UBC	Thomas	dna_new_BC_2011-12-13.csv
Pv12.427	Fraser	49.1204	-123.2104	1	9	2012	Harbour seal	LEPARM	Leptocottus_armatus	Pacific_Staghorn_Sculpin	96	NA	0.5818	58.18	UBC	Thomas	dna_new_BC_2011-12-13.csv
Pv12.427	Fraser	49.1204	-123.2104	1	9	2012	Harbour seal	SPITHA	Spirinchus_thaleichthys	Longfin_Smelt	69	NA	0.4182	41.82	UBC	Thomas	dna_new_BC_2011-12-13.csv
Pv12.428	Fraser	49.1204	-123.2104	1	9	2012	Harbour seal	ONCTSH	Oncorhynchus_tshawytscha	Chinook_Salmon	243	2419	1.0000	100.00	UBC	Thomas	dna_new_BC_2011-12-13.csv
Pv12.429	Fraser	49.1204	-123.2104	1	9	2012	Harbour seal	CLUPAL	Clupea_pallasii	Pacific_Herring	1	NA	0.0167	1.67	UBC	Thomas	dna_new_BC_2011-12-13.csv
Pv12.429	Fraser	49.1204	-123.2104	1	9	2012	Harbour seal	ONCKET	Oncorhynchus_keta	Chum_Salmon	NA	22	0.5573	55.73	UBC	Thomas	dna_new_BC_2011-12-13.csv
Pv12.429	Fraser	49.1204	-123.2104	1	9	2012	Harbour seal	ONCNER	Oncorhynchus_nerka	Sockeye_Salmon	20	1	0.0253	2.53	UBC	Thomas	dna_new_BC_2011-12-13.csv
Pv12.429	Fraser	49.1204	-123.2104	1	9	2012	Harbour seal	ONCTSH	Oncorhynchus_tshawytscha	Chinook_Salmon	18	2	0.0507	5.07	UBC	Thomas	dna_new_BC_2011-12-13.csv
Pv12.429	Fraser	49.1204	-123.2104	1	9	2012	Harbour seal	PARVET	Parophrys_vetulus	English_Sole	19	NA	0.3167	31.67	UBC	Thomas	dna_new_BC_2011-12-13.csv
Pv12.429	Fraser	49.1204	-123.2104	1	9	2012	Harbour seal	GADCHA	Gadus_chalcogrammus	Walleye_Pollock	2	NA	0.0333	3.33	UBC	Thomas	dna_new_BC_2011-12-13.csv
Pv12.430	Fraser	49.1204	-123.2104	1	9	2012	Harbour seal	CLUPAL	Clupea_pallasii	Pacific_Herring	1	NA	0.0476	4.76	UBC	Thomas	dna_new_BC_2011-12-13.csv
Pv12.430	Fraser	49.1204	-123.2104	1	9	2012	Harbour seal	HYDCOL	Hydrolagus_colliei	Spotted_Ratfish	11	NA	0.5238	52.38	UBC	Thomas	dna_new_BC_2011-12-13.csv
Pv12.430	Fraser	49.1204	-123.2104	1	9	2012	Harbour seal	LAMAYR	Lampetra_ayresii	River_Lamprey	1	NA	0.0476	4.76	UBC	Thomas	dna_new_BC_2011-12-13.csv
Pv12.430	Fraser	49.1204	-123.2104	1	9	2012	Harbour seal	ONCNER	Oncorhynchus_nerka	Sockeye_Salmon	4	NA	0.1905	19.05	UBC	Thomas	dna_new_BC_2011-12-13.csv
Pv12.430	Fraser	49.1204	-123.2104	1	9	2012	Harbour seal	ONCTSH	Oncorhynchus_tshawytscha	Chinook_Salmon	1	NA	0.0476	4.76	UBC	Thomas	dna_new_BC_2011-12-13.csv
Pv12.430	Fraser	49.1204	-123.2104	1	9	2012	Harbour seal	OPHELO	Ophiodon_elongatus	Lingcod	1	NA	0.0476	4.76	UBC	Thomas	dna_new_BC_2011-12-13.csv
Pv12.430	Fraser	49.1204	-123.2104	1	9	2012	Harbour seal	GADCHA	Gadus_chalcogrammus	Walleye_Pollock	2	NA	0.0952	9.52	UBC	Thomas	dna_new_BC_2011-12-13.csv
Pv12.431	Cowichan Bay	48.7562	-123.6223	4	9	2012	Harbour seal	BERMAG	Berryteuthis_magister	Magister_Armhook_Squid	5	NA	0.0175	1.75	UBC	Thomas	dna_new_BC_2011-12-13.csv
Pv12.431	Cowichan Bay	48.7562	-123.6223	4	9	2012	Harbour seal	MERPRO	Merluccius_productus	Pacific_Hake	277	NA	0.9719	97.19	UBC	Thomas	dna_new_BC_2011-12-13.csv
Pv12.431	Cowichan Bay	48.7562	-123.6223	4	9	2012	Harbour seal	ONCNER	Oncorhynchus_nerka	Sockeye_Salmon	3	NA	0.0105	1.05	UBC	Thomas	dna_new_BC_2011-12-13.csv
Pv12.432	Cowichan Bay	48.7562	-123.6223	4	9	2012	Harbour seal	MERPRO	Merluccius_productus	Pacific_Hake	1	NA	0.0139	1.39	UBC	Thomas	dna_new_BC_2011-12-13.csv
Pv12.432	Cowichan Bay	48.7562	-123.6223	4	9	2012	Harbour seal	ONCGOR	Oncorhynchus_gorbuscha	Pink_Salmon	47	668	0.3587	35.87	UBC	Thomas	dna_new_BC_2011-12-13.csv
Pv12.432	Cowichan Bay	48.7562	-123.6223	4	9	2012	Harbour seal	ONCKIS	Oncorhynchus_kisutch	Coho_Salmon	NA	314	0.1686	16.86	UBC	Thomas	dna_new_BC_2011-12-13.csv
Pv12.432	Cowichan Bay	48.7562	-123.6223	4	9	2012	Harbour seal	ONCTSH	Oncorhynchus_tshawytscha	Chinook_Salmon	20	777	0.4172	41.72	UBC	Thomas	dna_new_BC_2011-12-13.csv
Pv12.432	Cowichan Bay	48.7562	-123.6223	4	9	2012	Harbour seal	GADCHA	Gadus_chalcogrammus	Walleye_Pollock	3	NA	0.0417	4.17	UBC	Thomas	dna_new_BC_2011-12-13.csv
Pv12.433	Cowichan Bay	48.7562	-123.6223	4	9	2012	Harbour seal	MERPRO	Merluccius_productus	Pacific_Hake	212	NA	0.9770	97.70	UBC	Thomas	dna_new_BC_2011-12-13.csv
Pv12.433	Cowichan Bay	48.7562	-123.6223	4	9	2012	Harbour seal	ONCGOR	Oncorhynchus_gorbuscha	Pink_Salmon	NA	1	0.0029	0.29	UBC	Thomas	dna_new_BC_2011-12-13.csv
Pv12.433	Cowichan Bay	48.7562	-123.6223	4	9	2012	Harbour seal	ONCKET	Oncorhynchus_keta	Chum_Salmon	NA	1	0.0029	0.29	UBC	Thomas	dna_new_BC_2011-12-13.csv
Pv12.433	Cowichan Bay	48.7562	-123.6223	4	9	2012	Harbour seal	ONCNER	Oncorhynchus_nerka	Sockeye_Salmon	5	2	0.0058	0.58	UBC	Thomas	dna_new_BC_2011-12-13.csv
Pv12.433	Cowichan Bay	48.7562	-123.6223	4	9	2012	Harbour seal	ONCTSH	Oncorhynchus_tshawytscha	Chinook_Salmon	NA	4	0.0115	1.15	UBC	Thomas	dna_new_BC_2011-12-13.csv
Pv12.434	Cowichan Bay	48.7562	-123.6223	4	9	2012	Harbour seal	ONCGOR	Oncorhynchus_gorbuscha	Pink_Salmon	NA	192	0.0287	2.87	UBC	Thomas	dna_new_BC_2011-12-13.csv
Pv12.434	Cowichan Bay	48.7562	-123.6223	4	9	2012	Harbour seal	ONCTSH	Oncorhynchus_tshawytscha	Chinook_Salmon	NA	5	0.0007	0.07	UBC	Thomas	dna_new_BC_2011-12-13.csv
Pv12.434	Cowichan Bay	48.7562	-123.6223	4	9	2012	Harbour seal	GADCHA	Gadus_chalcogrammus	Walleye_Pollock	132	NA	0.9706	97.06	UBC	Thomas	dna_new_BC_2011-12-13.csv
Pv12.435	Cowichan Bay	48.7562	-123.6223	4	9	2012	Harbour seal	LAMAYR	Lampetra_ayresii	River_Lamprey	1555	NA	0.8280	82.80	UBC	Thomas	dna_new_BC_2011-12-13.csv
Pv12.435	Cowichan Bay	48.7562	-123.6223	4	9	2012	Harbour seal	GADCHA	Gadus_chalcogrammus	Walleye_Pollock	323	NA	0.1720	17.20	UBC	Thomas	dna_new_BC_2011-12-13.csv
Pv12.436	Cowichan Bay	48.7562	-123.6223	4	9	2012	Harbour seal	GADCHA	Gadus_chalcogrammus	Walleye_Pollock	655	NA	1.0000	100.00	UBC	Thomas	dna_new_BC_2011-12-13.csv
Pv12.437	Cowichan Bay	48.7562	-123.6223	4	9	2012	Harbour seal	ONCGOR	Oncorhynchus_gorbuscha	Pink_Salmon	189	3847	0.9041	90.41	UBC	Thomas	dna_new_BC_2011-12-13.csv
Pv12.437	Cowichan Bay	48.7562	-123.6223	4	9	2012	Harbour seal	ONCTSH	Oncorhynchus_tshawytscha	Chinook_Salmon	30	408	0.0959	9.59	UBC	Thomas	dna_new_BC_2011-12-13.csv
Pv12.438	Cowichan Bay	48.7562	-123.6223	4	9	2012	Harbour seal	LAMAYR	Lampetra_ayresii	River_Lamprey	1	NA	0.0204	2.04	UBC	Thomas	dna_new_BC_2011-12-13.csv
Pv12.438	Cowichan Bay	48.7562	-123.6223	4	9	2012	Harbour seal	ONCTSH	Oncorhynchus_tshawytscha	Chinook_Salmon	33	820	0.9388	93.88	UBC	Thomas	dna_new_BC_2011-12-13.csv
Pv12.438	Cowichan Bay	48.7562	-123.6223	4	9	2012	Harbour seal	GADCHA	Gadus_chalcogrammus	Walleye_Pollock	2	NA	0.0408	4.08	UBC	Thomas	dna_new_BC_2011-12-13.csv
Pv12.439	Cowichan Bay	48.7562	-123.6223	4	9	2012	Harbour seal	CYMAGG	Cymatogaster_aggregata	Shiner_Surfperch	54	NA	0.1061	10.61	UBC	Thomas	dna_new_BC_2011-12-13.csv
Pv12.439	Cowichan Bay	48.7562	-123.6223	4	9	2012	Harbour seal	ONCMYK	Oncorhynchus_mykiss	Steelhead	NA	1789	0.3238	32.38	UBC	Thomas	dna_new_BC_2011-12-13.csv
Pv12.439	Cowichan Bay	48.7562	-123.6223	4	9	2012	Harbour seal	ONCTSH	Oncorhynchus_tshawytscha	Chinook_Salmon	57	889	0.1609	16.09	UBC	Thomas	dna_new_BC_2011-12-13.csv
Pv12.439	Cowichan Bay	48.7562	-123.6223	4	9	2012	Harbour seal	OPHELO	Ophiodon_elongatus	Lingcod	158	NA	0.3104	31.04	UBC	Thomas	dna_new_BC_2011-12-13.csv
Pv12.439	Cowichan Bay	48.7562	-123.6223	4	9	2012	Harbour seal	GADCHA	Gadus_chalcogrammus	Walleye_Pollock	7	NA	0.0138	1.38	UBC	Thomas	dna_new_BC_2011-12-13.csv
Pv12.439	Cowichan Bay	48.7562	-123.6223	4	9	2012	Harbour seal	LEPARM	Leptocottus_armatus	Pacific_Staghorn_Sculpin	26	NA	0.0511	5.11	UBC	Thomas	dna_new_BC_2011-12-13.csv
Pv12.439	Cowichan Bay	48.7562	-123.6223	4	9	2012	Harbour seal	ONCKIS	Oncorhynchus_kisutch	Coho_Salmon	207	188	0.0340	3.40	UBC	Thomas	dna_new_BC_2011-12-13.csv
Pv12.440	Cowichan Bay	48.7562	-123.6223	4	9	2012	Harbour seal	CLUPAL	Clupea_pallasii	Pacific_Herring	137	NA	0.1578	15.78	UBC	Thomas	dna_new_BC_2011-12-13.csv
Pv12.440	Cowichan Bay	48.7562	-123.6223	4	9	2012	Harbour seal	MERPRO	Merluccius_productus	Pacific_Hake	731	NA	0.8422	84.22	UBC	Thomas	dna_new_BC_2011-12-13.csv
Pv12.441	Cowichan Bay	48.7562	-123.6223	4	9	2012	Harbour seal	CLUPAL	Clupea_pallasii	Pacific_Herring	1	NA	0.0101	1.01	UBC	Thomas	dna_new_BC_2011-12-13.csv
Pv12.441	Cowichan Bay	48.7562	-123.6223	4	9	2012	Harbour seal	ONCNER	Oncorhynchus_nerka	Sockeye_Salmon	2	5	0.0909	9.09	UBC	Thomas	dna_new_BC_2011-12-13.csv
Pv12.441	Cowichan Bay	48.7562	-123.6223	4	9	2012	Harbour seal	ONCTSH	Oncorhynchus_tshawytscha	Chinook_Salmon	7	5	0.0909	9.09	UBC	Thomas	dna_new_BC_2011-12-13.csv
Pv12.441	Cowichan Bay	48.7562	-123.6223	4	9	2012	Harbour seal	GADCHA	Gadus_chalcogrammus	Walleye_Pollock	80	NA	0.8081	80.81	UBC	Thomas	dna_new_BC_2011-12-13.csv
Pv12.442	Cowichan Bay	48.7562	-123.6223	4	9	2012	Harbour seal	CLUPAL	Clupea_pallasii	Pacific_Herring	7	NA	0.0787	7.87	UBC	Thomas	dna_new_BC_2011-12-13.csv
Pv12.442	Cowichan Bay	48.7562	-123.6223	4	9	2012	Harbour seal	ONCGOR	Oncorhynchus_gorbuscha	Pink_Salmon	9	NA	0.1011	10.11	UBC	Thomas	dna_new_BC_2011-12-13.csv
Pv12.442	Cowichan Bay	48.7562	-123.6223	4	9	2012	Harbour seal	ONCNER	Oncorhynchus_nerka	Sockeye_Salmon	2	NA	0.0225	2.25	UBC	Thomas	dna_new_BC_2011-12-13.csv
Pv12.442	Cowichan Bay	48.7562	-123.6223	4	9	2012	Harbour seal	ONCTSH	Oncorhynchus_tshawytscha	Chinook_Salmon	5	NA	0.0562	5.62	UBC	Thomas	dna_new_BC_2011-12-13.csv
Pv12.442	Cowichan Bay	48.7562	-123.6223	4	9	2012	Harbour seal	GADCHA	Gadus_chalcogrammus	Walleye_Pollock	66	NA	0.7416	74.16	UBC	Thomas	dna_new_BC_2011-12-13.csv
Pv12.443	Cowichan Bay	48.7562	-123.6223	4	9	2012	Harbour seal	GADCHA	Gadus_chalcogrammus	Walleye_Pollock	1311	NA	1.0000	100.00	UBC	Thomas	dna_new_BC_2011-12-13.csv
Pv12.444	Cowichan Bay	48.7562	-123.6223	4	9	2012	Harbour seal	CLUPAL	Clupea_pallasii	Pacific_Herring	660	NA	1.0000	100.00	UBC	Thomas	dna_new_BC_2011-12-13.csv
Pv12.445	Cowichan Bay	48.7562	-123.6223	4	9	2012	Harbour seal	CLUPAL	Clupea_pallasii	Pacific_Herring	81	NA	0.6923	69.23	UBC	Thomas	dna_new_BC_2011-12-13.csv
Pv12.445	Cowichan Bay	48.7562	-123.6223	4	9	2012	Harbour seal	MERPRO	Merluccius_productus	Pacific_Hake	2	NA	0.0171	1.71	UBC	Thomas	dna_new_BC_2011-12-13.csv
Pv12.445	Cowichan Bay	48.7562	-123.6223	4	9	2012	Harbour seal	ONCNER	Oncorhynchus_nerka	Sockeye_Salmon	4	NA	0.0342	3.42	UBC	Thomas	dna_new_BC_2011-12-13.csv
Pv12.445	Cowichan Bay	48.7562	-123.6223	4	9	2012	Harbour seal	ONCTSH	Oncorhynchus_tshawytscha	Chinook_Salmon	30	NA	0.2564	25.64	UBC	Thomas	dna_new_BC_2011-12-13.csv
Pv12.446	Cowichan Bay	48.7562	-123.6223	4	9	2012	Harbour seal	CLUPAL	Clupea_pallasii	Pacific_Herring	1	NA	0.0103	1.03	UBC	Thomas	dna_new_BC_2011-12-13.csv
Pv12.446	Cowichan Bay	48.7562	-123.6223	4	9	2012	Harbour seal	HYDCOL	Hydrolagus_colliei	Spotted_Ratfish	1	NA	0.0103	1.03	UBC	Thomas	dna_new_BC_2011-12-13.csv
Pv12.446	Cowichan Bay	48.7562	-123.6223	4	9	2012	Harbour seal	MERPRO	Merluccius_productus	Pacific_Hake	1	NA	0.0103	1.03	UBC	Thomas	dna_new_BC_2011-12-13.csv
Pv12.446	Cowichan Bay	48.7562	-123.6223	4	9	2012	Harbour seal	ONCCLA	Oncorhynchus_clarkii	Cutthroat_Trout	NA	1	0.0052	0.52	UBC	Thomas	dna_new_BC_2011-12-13.csv
Pv12.446	Cowichan Bay	48.7562	-123.6223	4	9	2012	Harbour seal	ONCKET	Oncorhynchus_keta	Chum_Salmon	NA	1	0.0052	0.52	UBC	Thomas	dna_new_BC_2011-12-13.csv
Pv12.446	Cowichan Bay	48.7562	-123.6223	4	9	2012	Harbour seal	ONCNER	Oncorhynchus_nerka	Sockeye_Salmon	3	2	0.0103	1.03	UBC	Thomas	dna_new_BC_2011-12-13.csv
Pv12.446	Cowichan Bay	48.7562	-123.6223	4	9	2012	Harbour seal	ONCTSH	Oncorhynchus_tshawytscha	Chinook_Salmon	1	4	0.0206	2.06	UBC	Thomas	dna_new_BC_2011-12-13.csv
Pv12.446	Cowichan Bay	48.7562	-123.6223	4	9	2012	Harbour seal	GADCHA	Gadus_chalcogrammus	Walleye_Pollock	90	NA	0.9278	92.78	UBC	Thomas	dna_new_BC_2011-12-13.csv
Pv12.447	Cowichan Bay	48.7562	-123.6223	4	9	2012	Harbour seal	ONCTSH	Oncorhynchus_tshawytscha	Chinook_Salmon	725	3909	1.0000	100.00	UBC	Thomas	dna_new_BC_2011-12-13.csv
Pv12.448	Cowichan Bay	48.7562	-123.6223	4	9	2012	Harbour seal	LAMAYR	Lampetra_ayresii	River_Lamprey	3	NA	0.0102	1.02	UBC	Thomas	dna_new_BC_2011-12-13.csv
Pv12.448	Cowichan Bay	48.7562	-123.6223	4	9	2012	Harbour seal	MERPRO	Merluccius_productus	Pacific_Hake	174	NA	0.5918	59.18	UBC	Thomas	dna_new_BC_2011-12-13.csv
Pv12.448	Cowichan Bay	48.7562	-123.6223	4	9	2012	Harbour seal	ONCTSH	Oncorhynchus_tshawytscha	Chinook_Salmon	6	NA	0.0204	2.04	UBC	Thomas	dna_new_BC_2011-12-13.csv
Pv12.448	Cowichan Bay	48.7562	-123.6223	4	9	2012	Harbour seal	GADCHA	Gadus_chalcogrammus	Walleye_Pollock	111	NA	0.3776	37.76	UBC	Thomas	dna_new_BC_2011-12-13.csv
Pv12.449	Cowichan Bay	48.7562	-123.6223	4	9	2012	Harbour seal	GADCHA	Gadus_chalcogrammus	Walleye_Pollock	1809	NA	1.0000	100.00	UBC	Thomas	dna_new_BC_2011-12-13.csv
Pv12.450	Cowichan Bay	48.7562	-123.6223	4	9	2012	Harbour seal	GADCHA	Gadus_chalcogrammus	Walleye_Pollock	1519	NA	1.0000	100.00	UBC	Thomas	dna_new_BC_2011-12-13.csv
Pv12.451	Cowichan Bay	48.7562	-123.6223	4	9	2012	Harbour seal	CLUPAL	Clupea_pallasii	Pacific_Herring	187	NA	0.9078	90.78	UBC	Thomas	dna_new_BC_2011-12-13.csv
Pv12.451	Cowichan Bay	48.7562	-123.6223	4	9	2012	Harbour seal	LEPARM	Leptocottus_armatus	Pacific_Staghorn_Sculpin	19	NA	0.0922	9.22	UBC	Thomas	dna_new_BC_2011-12-13.csv
Pv12.452	Cowichan Bay	48.7562	-123.6223	4	9	2012	Harbour seal	BERMAG	Berryteuthis_magister	Magister_Armhook_Squid	17	NA	0.0425	4.25	UBC	Thomas	dna_new_BC_2011-12-13.csv
Pv12.452	Cowichan Bay	48.7562	-123.6223	4	9	2012	Harbour seal	MERPRO	Merluccius_productus	Pacific_Hake	383	NA	0.9575	95.75	UBC	Thomas	dna_new_BC_2011-12-13.csv
Pv12.453	Cowichan Bay	48.7562	-123.6223	4	9	2012	Harbour seal	LEPARM	Leptocottus_armatus	Pacific_Staghorn_Sculpin	30	NA	0.0492	4.92	UBC	Thomas	dna_new_BC_2011-12-13.csv
Pv12.453	Cowichan Bay	48.7562	-123.6223	4	9	2012	Harbour seal	ONCKET	Oncorhynchus_keta	Chum_Salmon	NA	3	0.0733	7.33	UBC	Thomas	dna_new_BC_2011-12-13.csv
Pv12.453	Cowichan Bay	48.7562	-123.6223	4	9	2012	Harbour seal	ONCKIS	Oncorhynchus_kisutch	Coho_Salmon	NA	1	0.0244	2.44	UBC	Thomas	dna_new_BC_2011-12-13.csv
Pv12.453	Cowichan Bay	48.7562	-123.6223	4	9	2012	Harbour seal	ONCTSH	Oncorhynchus_tshawytscha	Chinook_Salmon	NA	7	0.1711	17.11	UBC	Thomas	dna_new_BC_2011-12-13.csv
Pv12.453	Cowichan Bay	48.7562	-123.6223	4	9	2012	Harbour seal	CLUPAL	Clupea_pallasii	Pacific_Herring	23	NA	0.0377	3.77	UBC	Thomas	dna_new_BC_2011-12-13.csv
Pv12.453	Cowichan Bay	48.7562	-123.6223	4	9	2012	Harbour seal	CYMAGG	Cymatogaster_aggregata	Shiner_Surfperch	393	NA	0.6443	64.43	UBC	Thomas	dna_new_BC_2011-12-13.csv
Pv12.454	Cowichan Bay	48.7562	-123.6223	4	9	2012	Harbour seal	ONCGOR	Oncorhynchus_gorbuscha	Pink_Salmon	24	149	0.0314	3.14	UBC	Thomas	dna_new_BC_2011-12-13.csv
Pv12.454	Cowichan Bay	48.7562	-123.6223	4	9	2012	Harbour seal	ONCTSH	Oncorhynchus_tshawytscha	Chinook_Salmon	151	4597	0.9686	96.86	UBC	Thomas	dna_new_BC_2011-12-13.csv
Pv12.455	Cowichan Bay	48.7562	-123.6223	4	9	2012	Harbour seal	CLUPAL	Clupea_pallasii	Pacific_Herring	7	NA	0.0335	3.35	UBC	Thomas	dna_new_BC_2011-12-13.csv
Pv12.455	Cowichan Bay	48.7562	-123.6223	4	9	2012	Harbour seal	MALVIL	Mallotus_villosus	Capelin	4	NA	0.0191	1.91	UBC	Thomas	dna_new_BC_2011-12-13.csv
Pv12.455	Cowichan Bay	48.7562	-123.6223	4	9	2012	Harbour seal	ONCTSH	Oncorhynchus_tshawytscha	Chinook_Salmon	198	4509	0.9474	94.74	UBC	Thomas	dna_new_BC_2011-12-13.csv
Pv12.456	Cowichan Bay	48.7562	-123.6223	4	9	2012	Harbour seal	CLUPAL	Clupea_pallasii	Pacific_Herring	12	NA	0.0714	7.14	UBC	Thomas	dna_new_BC_2011-12-13.csv
Pv12.456	Cowichan Bay	48.7562	-123.6223	4	9	2012	Harbour seal	CYMAGG	Cymatogaster_aggregata	Shiner_Surfperch	124	NA	0.7381	73.81	UBC	Thomas	dna_new_BC_2011-12-13.csv
Pv12.456	Cowichan Bay	48.7562	-123.6223	4	9	2012	Harbour seal	GASACU	Gasterosteus_aculeatus	Threespine_Stickleback	4	NA	0.0238	2.38	UBC	Thomas	dna_new_BC_2011-12-13.csv
Pv12.456	Cowichan Bay	48.7562	-123.6223	4	9	2012	Harbour seal	ONCGOR	Oncorhynchus_gorbuscha	Pink_Salmon	NA	1	0.0053	0.53	UBC	Thomas	dna_new_BC_2011-12-13.csv
Pv12.456	Cowichan Bay	48.7562	-123.6223	4	9	2012	Harbour seal	ONCKET	Oncorhynchus_keta	Chum_Salmon	NA	3	0.0160	1.60	UBC	Thomas	dna_new_BC_2011-12-13.csv
Pv12.456	Cowichan Bay	48.7562	-123.6223	4	9	2012	Harbour seal	ONCTSH	Oncorhynchus_tshawytscha	Chinook_Salmon	NA	6	0.0320	3.20	UBC	Thomas	dna_new_BC_2011-12-13.csv
Pv12.456	Cowichan Bay	48.7562	-123.6223	4	9	2012	Harbour seal	SALSAL	Salmo_salar	Atlantic_Salmon	NA	19	0.1014	10.14	UBC	Thomas	dna_new_BC_2011-12-13.csv
Pv12.456	Cowichan Bay	48.7562	-123.6223	4	9	2012	Harbour seal	SQUACA	Squalus_acanthias	Spiny_Dogfish	2	NA	0.0119	1.19	UBC	Thomas	dna_new_BC_2011-12-13.csv
Pv12.457	Cowichan Bay	48.7562	-123.6223	4	9	2012	Harbour seal	CLUPAL	Clupea_pallasii	Pacific_Herring	546	NA	0.6724	67.24	UBC	Thomas	dna_new_BC_2011-12-13.csv
Pv12.457	Cowichan Bay	48.7562	-123.6223	4	9	2012	Harbour seal	LAMAYR	Lampetra_ayresii	River_Lamprey	17	NA	0.0209	2.09	UBC	Thomas	dna_new_BC_2011-12-13.csv
Pv12.457	Cowichan Bay	48.7562	-123.6223	4	9	2012	Harbour seal	ONCTSH	Oncorhynchus_tshawytscha	Chinook_Salmon	249	2435	0.3067	30.67	UBC	Thomas	dna_new_BC_2011-12-13.csv
Pv12.459	Comox	49.6016	-124.8904	5	9	2012	Harbour seal	CLUPAL	Clupea_pallasii	Pacific_Herring	2	NA	0.0116	1.16	UBC	Thomas	dna_new_BC_2011-12-13.csv
Pv12.459	Comox	49.6016	-124.8904	5	9	2012	Harbour seal	ONCGOR	Oncorhynchus_gorbuscha	Pink_Salmon	168	NA	0.9767	97.67	UBC	Thomas	dna_new_BC_2011-12-13.csv
Pv12.459	Comox	49.6016	-124.8904	5	9	2012	Harbour seal	ONCKET	Oncorhynchus_keta	Chum_Salmon	2	NA	0.0116	1.16	UBC	Thomas	dna_new_BC_2011-12-13.csv
Pv12.460	Comox	49.6016	-124.8904	5	9	2012	Harbour seal	CLUPAL	Clupea_pallasii	Pacific_Herring	18	NA	0.0385	3.85	UBC	Thomas	dna_new_BC_2011-12-13.csv
Pv12.460	Comox	49.6016	-124.8904	5	9	2012	Harbour seal	CYMAGG	Cymatogaster_aggregata	Shiner_Surfperch	207	NA	0.4433	44.33	UBC	Thomas	dna_new_BC_2011-12-13.csv
Pv12.460	Comox	49.6016	-124.8904	5	9	2012	Harbour seal	ONCGOR	Oncorhynchus_gorbuscha	Pink_Salmon	22	NA	0.0471	4.71	UBC	Thomas	dna_new_BC_2011-12-13.csv
Pv12.460	Comox	49.6016	-124.8904	5	9	2012	Harbour seal	PARVET	Parophrys_vetulus	English_Sole	220	NA	0.4711	47.11	UBC	Thomas	dna_new_BC_2011-12-13.csv
Pv12.461	Comox	49.6016	-124.8904	5	9	2012	Harbour seal	CLUPAL	Clupea_pallasii	Pacific_Herring	4	NA	0.0202	2.02	UBC	Thomas	dna_new_BC_2011-12-13.csv
Pv12.461	Comox	49.6016	-124.8904	5	9	2012	Harbour seal	MERPRO	Merluccius_productus	Pacific_Hake	191	NA	0.9646	96.46	UBC	Thomas	dna_new_BC_2011-12-13.csv
Pv12.461	Comox	49.6016	-124.8904	5	9	2012	Harbour seal	PARVET	Parophrys_vetulus	English_Sole	3	NA	0.0152	1.52	UBC	Thomas	dna_new_BC_2011-12-13.csv
Pv12.463	Comox	49.6016	-124.8904	5	9	2012	Harbour seal	ONCGOR	Oncorhynchus_gorbuscha	Pink_Salmon	80	NA	0.3008	30.08	UBC	Thomas	dna_new_BC_2011-12-13.csv
Pv12.463	Comox	49.6016	-124.8904	5	9	2012	Harbour seal	ONCKET	Oncorhynchus_keta	Chum_Salmon	33	NA	0.1241	12.41	UBC	Thomas	dna_new_BC_2011-12-13.csv
Pv12.463	Comox	49.6016	-124.8904	5	9	2012	Harbour seal	ONCKIS	Oncorhynchus_kisutch	Coho_Salmon	70	NA	0.2632	26.32	UBC	Thomas	dna_new_BC_2011-12-13.csv
Pv12.463	Comox	49.6016	-124.8904	5	9	2012	Harbour seal	ONCNER	Oncorhynchus_nerka	Sockeye_Salmon	45	NA	0.1692	16.92	UBC	Thomas	dna_new_BC_2011-12-13.csv
Pv12.463	Comox	49.6016	-124.8904	5	9	2012	Harbour seal	ONCTSH	Oncorhynchus_tshawytscha	Chinook_Salmon	35	NA	0.1316	13.16	UBC	Thomas	dna_new_BC_2011-12-13.csv
Pv12.463	Comox	49.6016	-124.8904	5	9	2012	Harbour seal	CLUPAL	Clupea_pallasii	Pacific_Herring	3	NA	0.0113	1.13	UBC	Thomas	dna_new_BC_2011-12-13.csv
Pv12.464	Comox	49.6016	-124.8904	5	9	2012	Harbour seal	ONCTSH	Oncorhynchus_tshawytscha	Chinook_Salmon	54	NA	0.0673	6.73	UBC	Thomas	dna_new_BC_2011-12-13.csv
Pv12.464	Comox	49.6016	-124.8904	5	9	2012	Harbour seal	OPHELO	Ophiodon_elongatus	Lingcod	748	NA	0.9327	93.27	UBC	Thomas	dna_new_BC_2011-12-13.csv
Pv12.465	Comox	49.6016	-124.8904	5	9	2012	Harbour seal	CLUPAL	Clupea_pallasii	Pacific_Herring	717	NA	0.9862	98.62	UBC	Thomas	dna_new_BC_2011-12-13.csv
Pv12.465	Comox	49.6016	-124.8904	5	9	2012	Harbour seal	MERPRO	Merluccius_productus	Pacific_Hake	10	NA	0.0138	1.38	UBC	Thomas	dna_new_BC_2011-12-13.csv
Pv12.466	Comox	49.6016	-124.8904	5	9	2012	Harbour seal	CLUPAL	Clupea_pallasii	Pacific_Herring	1	NA	0.0233	2.33	UBC	Thomas	dna_new_BC_2011-12-13.csv
Pv12.466	Comox	49.6016	-124.8904	5	9	2012	Harbour seal	LEPARM	Leptocottus_armatus	Pacific_Staghorn_Sculpin	27	NA	0.6279	62.79	UBC	Thomas	dna_new_BC_2011-12-13.csv
Pv12.466	Comox	49.6016	-124.8904	5	9	2012	Harbour seal	LUMSAG	Lumpenus_sagitta	Snake_Prickleback	15	NA	0.3488	34.88	UBC	Thomas	dna_new_BC_2011-12-13.csv
Pv12.468	Comox	49.6016	-124.8904	5	9	2012	Harbour seal	CLUPAL	Clupea_pallasii	Pacific_Herring	176	NA	1.0000	100.00	UBC	Thomas	dna_new_BC_2011-12-13.csv
Pv12.469	Comox	49.6016	-124.8904	5	9	2012	Harbour seal	CLUPAL	Clupea_pallasii	Pacific_Herring	429	NA	1.0000	100.00	UBC	Thomas	dna_new_BC_2011-12-13.csv
Pv12.472	Comox	49.6016	-124.8904	5	9	2012	Harbour seal	CYMAGG	Cymatogaster_aggregata	Shiner_Surfperch	59	NA	0.1199	11.99	UBC	Thomas	dna_new_BC_2011-12-13.csv
Pv12.472	Comox	49.6016	-124.8904	5	9	2012	Harbour seal	LEPARM	Leptocottus_armatus	Pacific_Staghorn_Sculpin	433	NA	0.8801	88.01	UBC	Thomas	dna_new_BC_2011-12-13.csv
Pv12.474	Comox	49.6016	-124.8904	5	9	2012	Harbour seal	HYDCOL	Hydrolagus_colliei	Spotted_Ratfish	16	NA	1.0000	100.00	UBC	Thomas	dna_new_BC_2011-12-13.csv
Pv12.475	Comox	49.6016	-124.8904	5	9	2012	Harbour seal	ONCKET	Oncorhynchus_keta	Chum_Salmon	67	NA	0.2000	20.00	UBC	Thomas	dna_new_BC_2011-12-13.csv
Pv12.475	Comox	49.6016	-124.8904	5	9	2012	Harbour seal	GADCHA	Gadus_chalcogrammus	Walleye_Pollock	268	NA	0.8000	80.00	UBC	Thomas	dna_new_BC_2011-12-13.csv
Pv12.476	Comox	49.6016	-124.8904	5	9	2012	Harbour seal	CLUPAL	Clupea_pallasii	Pacific_Herring	1	NA	0.0118	1.18	UBC	Thomas	dna_new_BC_2011-12-13.csv
Pv12.476	Comox	49.6016	-124.8904	5	9	2012	Harbour seal	LAMAYR	Lampetra_ayresii	River_Lamprey	2	NA	0.0235	2.35	UBC	Thomas	dna_new_BC_2011-12-13.csv
Pv12.476	Comox	49.6016	-124.8904	5	9	2012	Harbour seal	LUMSAG	Lumpenus_sagitta	Snake_Prickleback	1	NA	0.0118	1.18	UBC	Thomas	dna_new_BC_2011-12-13.csv
Pv12.476	Comox	49.6016	-124.8904	5	9	2012	Harbour seal	ONCTSH	Oncorhynchus_tshawytscha	Chinook_Salmon	79	1167	0.9412	94.12	UBC	Thomas	dna_new_BC_2011-12-13.csv
Pv12.476	Comox	49.6016	-124.8904	5	9	2012	Harbour seal	GADCHA	Gadus_chalcogrammus	Walleye_Pollock	1	NA	0.0118	1.18	UBC	Thomas	dna_new_BC_2011-12-13.csv
Pv12.477	Comox	49.6016	-124.8904	5	9	2012	Harbour seal	MERPRO	Merluccius_productus	Pacific_Hake	3678	NA	0.9613	96.13	UBC	Thomas	dna_new_BC_2011-12-13.csv
Pv12.477	Comox	49.6016	-124.8904	5	9	2012	Harbour seal	ONCTSH	Oncorhynchus_tshawytscha	Chinook_Salmon	148	2333	0.0387	3.87	UBC	Thomas	dna_new_BC_2011-12-13.csv
Pv12.479	Comox	49.6016	-124.8904	5	9	2012	Harbour seal	CLUPAL	Clupea_pallasii	Pacific_Herring	338	NA	1.0000	100.00	UBC	Thomas	dna_new_BC_2011-12-13.csv
Pv12.480	Comox	49.6016	-124.8904	5	9	2012	Harbour seal	LUMSAG	Lumpenus_sagitta	Snake_Prickleback	1	NA	0.0116	1.16	UBC	Thomas	dna_new_BC_2011-12-13.csv
Pv12.480	Comox	49.6016	-124.8904	5	9	2012	Harbour seal	CLUPAL	Clupea_pallasii	Pacific_Herring	2	NA	0.0233	2.33	UBC	Thomas	dna_new_BC_2011-12-13.csv
Pv12.480	Comox	49.6016	-124.8904	5	9	2012	Harbour seal	HEXSTE	Hexagrammos_stelleri	Whitespotted_Greenling	16	NA	0.1860	18.60	UBC	Thomas	dna_new_BC_2011-12-13.csv
Pv12.480	Comox	49.6016	-124.8904	5	9	2012	Harbour seal	LAMAYR	Lampetra_ayresii	River_Lamprey	2	NA	0.0233	2.33	UBC	Thomas	dna_new_BC_2011-12-13.csv
Pv12.480	Comox	49.6016	-124.8904	5	9	2012	Harbour seal	LEPARM	Leptocottus_armatus	Pacific_Staghorn_Sculpin	65	NA	0.7558	75.58	UBC	Thomas	dna_new_BC_2011-12-13.csv
Pv12.481	Comox	49.6016	-124.8904	5	9	2012	Harbour seal	CLUPAL	Clupea_pallasii	Pacific_Herring	2	NA	0.0147	1.47	UBC	Thomas	dna_new_BC_2011-12-13.csv
Pv12.481	Comox	49.6016	-124.8904	5	9	2012	Harbour seal	LUMSAG	Lumpenus_sagitta	Snake_Prickleback	132	NA	0.9706	97.06	UBC	Thomas	dna_new_BC_2011-12-13.csv
Pv12.481	Comox	49.6016	-124.8904	5	9	2012	Harbour seal	ONCKET	Oncorhynchus_keta	Chum_Salmon	2	NA	0.0147	1.47	UBC	Thomas	dna_new_BC_2011-12-13.csv
Pv12.482	Comox	49.6016	-124.8904	5	9	2012	Harbour seal	AMMHEX	Ammodytes_hexapterus	Pacific_Sand_Lance	275	NA	1.0000	100.00	UBC	Thomas	dna_new_BC_2011-12-13.csv
Pv12.483	Comox	49.6016	-124.8904	5	9	2012	Harbour seal	OPHELO	Ophiodon_elongatus	Lingcod	151	NA	0.5875	58.75	UBC	Thomas	dna_new_BC_2011-12-13.csv
Pv12.483	Comox	49.6016	-124.8904	5	9	2012	Harbour seal	CLUPAL	Clupea_pallasii	Pacific_Herring	3	NA	0.0117	1.17	UBC	Thomas	dna_new_BC_2011-12-13.csv
Pv12.483	Comox	49.6016	-124.8904	5	9	2012	Harbour seal	MERPRO	Merluccius_productus	Pacific_Hake	103	NA	0.4008	40.08	UBC	Thomas	dna_new_BC_2011-12-13.csv
Pv12.484	Comox	49.6016	-124.8904	5	9	2012	Harbour seal	CLUPAL	Clupea_pallasii	Pacific_Herring	557	NA	0.8799	87.99	UBC	Thomas	dna_new_BC_2011-12-13.csv
Pv12.484	Comox	49.6016	-124.8904	5	9	2012	Harbour seal	HIPROB	Hippoglossoides_elassodon	Flathead_sole	76	NA	0.1201	12.01	UBC	Thomas	dna_new_BC_2011-12-13.csv
Pv12.485	Comox	49.6016	-124.8904	5	9	2012	Harbour seal	CLUPAL	Clupea_pallasii	Pacific_Herring	376	NA	1.0000	100.00	UBC	Thomas	dna_new_BC_2011-12-13.csv
Pv12.486	Comox	49.6016	-124.8904	5	9	2012	Harbour seal	LUMSAG	Lumpenus_sagitta	Snake_Prickleback	845	NA	1.0000	100.00	UBC	Thomas	dna_new_BC_2011-12-13.csv
Pv12.487	Comox	49.6016	-124.8904	5	9	2012	Harbour seal	CLUPAL	Clupea_pallasii	Pacific_Herring	3	NA	0.0139	1.39	UBC	Thomas	dna_new_BC_2011-12-13.csv
Pv12.487	Comox	49.6016	-124.8904	5	9	2012	Harbour seal	CYMAGG	Cymatogaster_aggregata	Shiner_Surfperch	45	NA	0.2083	20.83	UBC	Thomas	dna_new_BC_2011-12-13.csv
Pv12.487	Comox	49.6016	-124.8904	5	9	2012	Harbour seal	LEPARM	Leptocottus_armatus	Pacific_Staghorn_Sculpin	168	NA	0.7778	77.78	UBC	Thomas	dna_new_BC_2011-12-13.csv
Pv12.488	Comox	49.6016	-124.8904	5	9	2012	Harbour seal	CLUPAL	Clupea_pallasii	Pacific_Herring	295	NA	0.9833	98.33	UBC	Thomas	dna_new_BC_2011-12-13.csv
Pv12.488	Comox	49.6016	-124.8904	5	9	2012	Harbour seal	ONCKIS	Oncorhynchus_kisutch	Coho_Salmon	5	NA	0.0167	1.67	UBC	Thomas	dna_new_BC_2011-12-13.csv
Pv12.489	Comox	49.6016	-124.8904	5	9	2012	Harbour seal	CLUPAL	Clupea_pallasii	Pacific_Herring	502	NA	1.0000	100.00	UBC	Thomas	dna_new_BC_2011-12-13.csv
Pv12.491	Fraser	49.1204	-123.2104	19	9	2012	Harbour seal	CLUPAL	Clupea_pallasii	Pacific_Herring	9	NA	0.0102	1.02	UBC	Thomas	dna_new_BC_2011-12-13.csv
Pv12.491	Fraser	49.1204	-123.2104	19	9	2012	Harbour seal	ONCKET	Oncorhynchus_keta	Chum_Salmon	870	3455	0.9898	98.98	UBC	Thomas	dna_new_BC_2011-12-13.csv
Pv12.492	Fraser	49.1204	-123.2104	19	9	2012	Harbour seal	HIPSTE	Hippoglossus_stenolepis	Pacific_Halibut	27	NA	0.0288	2.88	UBC	Thomas	dna_new_BC_2011-12-13.csv
Pv12.492	Fraser	49.1204	-123.2104	19	9	2012	Harbour seal	ONCKET	Oncorhynchus_keta	Chum_Salmon	911	3047	0.9712	97.12	UBC	Thomas	dna_new_BC_2011-12-13.csv
Pv12.493	Fraser	49.1204	-123.2104	19	9	2012	Harbour seal	CLUPAL	Clupea_pallasii	Pacific_Herring	111	NA	1.0000	100.00	UBC	Thomas	dna_new_BC_2011-12-13.csv
Pv12.494	Fraser	49.1204	-123.2104	19	9	2012	Harbour seal	ONCKET	Oncorhynchus_keta	Chum_Salmon	435	3174	1.0000	100.00	UBC	Thomas	dna_new_BC_2011-12-13.csv
Pv12.495	Fraser	49.1204	-123.2104	19	9	2012	Harbour seal	ONCTSH	Oncorhynchus_tshawytscha	Chinook_Salmon	330	3775	1.0000	100.00	UBC	Thomas	dna_new_BC_2011-12-13.csv
Pv12.496	Fraser	49.1204	-123.2104	19	9	2012	Harbour seal	CLUPAL	Clupea_pallasii	Pacific_Herring	2	NA	0.0103	1.03	UBC	Thomas	dna_new_BC_2011-12-13.csv
Pv12.496	Fraser	49.1204	-123.2104	19	9	2012	Harbour seal	MERPRO	Merluccius_productus	Pacific_Hake	2	NA	0.0103	1.03	UBC	Thomas	dna_new_BC_2011-12-13.csv
Pv12.496	Fraser	49.1204	-123.2104	19	9	2012	Harbour seal	NA	Lepidopsetta_bilineata_OR_ Platichthys_stellatus	Rock_Sole_OR_Starry_Flounder	189	NA	0.9692	96.92	UBC	Thomas	dna_new_BC_2011-12-13.csv
Pv12.496	Fraser	49.1204	-123.2104	19	9	2012	Harbour seal	PSEMEL	Psettichthys_melanostictus	Sand_Sole	2	NA	0.0103	1.03	UBC	Thomas	dna_new_BC_2011-12-13.csv
Pv12.497	Fraser	49.1204	-123.2104	19	9	2012	Harbour seal	CLUPAL	Clupea_pallasii	Pacific_Herring	8	NA	0.0899	8.99	UBC	Thomas	dna_new_BC_2011-12-13.csv
Pv12.497	Fraser	49.1204	-123.2104	19	9	2012	Harbour seal	CYMAGG	Cymatogaster_aggregata	Shiner_Surfperch	1	NA	0.0112	1.12	UBC	Thomas	dna_new_BC_2011-12-13.csv
Pv12.497	Fraser	49.1204	-123.2104	19	9	2012	Harbour seal	LAMAYR	Lampetra_ayresii	River_Lamprey	1	NA	0.0112	1.12	UBC	Thomas	dna_new_BC_2011-12-13.csv
Pv12.497	Fraser	49.1204	-123.2104	19	9	2012	Harbour seal	MERPRO	Merluccius_productus	Pacific_Hake	1	NA	0.0112	1.12	UBC	Thomas	dna_new_BC_2011-12-13.csv
Pv12.497	Fraser	49.1204	-123.2104	19	9	2012	Harbour seal	ONCNER	Oncorhynchus_nerka	Sockeye_Salmon	NA	810	0.8764	87.64	UBC	Thomas	dna_new_BC_2011-12-13.csv
Pv12.498	Fraser	49.1204	-123.2104	19	9	2012	Harbour seal	ONCKET	Oncorhynchus_keta	Chum_Salmon	3163	3053	0.9788	97.88	UBC	Thomas	dna_new_BC_2011-12-13.csv
Pv12.498	Fraser	49.1204	-123.2104	19	9	2012	Harbour seal	ONCTSH	Oncorhynchus_tshawytscha	Chinook_Salmon	NA	66	0.0212	2.12	UBC	Thomas	dna_new_BC_2011-12-13.csv
Pv12.499	Fraser	49.1204	-123.2104	19	9	2012	Harbour seal	ONCKET	Oncorhynchus_keta	Chum_Salmon	1069	1882	0.5001	50.01	UBC	Thomas	dna_new_BC_2011-12-13.csv
Pv12.499	Fraser	49.1204	-123.2104	19	9	2012	Harbour seal	ONCKIS	Oncorhynchus_kisutch	Coho_Salmon	308	1881	0.4999	49.99	UBC	Thomas	dna_new_BC_2011-12-13.csv
Pv12.500	Fraser	49.1204	-123.2104	19	9	2012	Harbour seal	MERPRO	Merluccius_productus	Pacific_Hake	51	NA	0.1353	13.53	UBC	Thomas	dna_new_BC_2011-12-13.csv
Pv12.500	Fraser	49.1204	-123.2104	19	9	2012	Harbour seal	ONCNER	Oncorhynchus_nerka	Sockeye_Salmon	100	NA	0.2653	26.53	UBC	Thomas	dna_new_BC_2011-12-13.csv
Pv12.500	Fraser	49.1204	-123.2104	19	9	2012	Harbour seal	ONCTSH	Oncorhynchus_tshawytscha	Chinook_Salmon	78	NA	0.2069	20.69	UBC	Thomas	dna_new_BC_2011-12-13.csv
Pv12.500	Fraser	49.1204	-123.2104	19	9	2012	Harbour seal	NA	Lepidopsetta_bilineata_OR_ Platichthys_stellatus	Rock_Sole_OR_Starry_Flounder	44	NA	0.1167	11.67	UBC	Thomas	dna_new_BC_2011-12-13.csv
Pv12.500	Fraser	49.1204	-123.2104	19	9	2012	Harbour seal	GADCHA	Gadus_chalcogrammus	Walleye_Pollock	104	NA	0.2759	27.59	UBC	Thomas	dna_new_BC_2011-12-13.csv
Pv12.501	Fraser	49.1204	-123.2104	19	9	2012	Harbour seal	ONCKET	Oncorhynchus_keta	Chum_Salmon	2218	4020	1.0000	100.00	UBC	Thomas	dna_new_BC_2011-12-13.csv
Pv12.502	Fraser	49.1204	-123.2104	19	9	2012	Harbour seal	GADCHA	Gadus_chalcogrammus	Walleye_Pollock	1	NA	0.0147	1.47	UBC	Thomas	dna_new_BC_2011-12-13.csv
Pv12.502	Fraser	49.1204	-123.2104	19	9	2012	Harbour seal	CLUPAL	Clupea_pallasii	Pacific_Herring	6	NA	0.0882	8.82	UBC	Thomas	dna_new_BC_2011-12-13.csv
Pv12.502	Fraser	49.1204	-123.2104	19	9	2012	Harbour seal	CYMAGG	Cymatogaster_aggregata	Shiner_Surfperch	1	NA	0.0147	1.47	UBC	Thomas	dna_new_BC_2011-12-13.csv
Pv12.502	Fraser	49.1204	-123.2104	19	9	2012	Harbour seal	LAMAYR	Lampetra_ayresii	River_Lamprey	1	NA	0.0147	1.47	UBC	Thomas	dna_new_BC_2011-12-13.csv
Pv12.502	Fraser	49.1204	-123.2104	19	9	2012	Harbour seal	ONCTSH	Oncorhynchus_tshawytscha	Chinook_Salmon	59	2450	0.8676	86.76	UBC	Thomas	dna_new_BC_2011-12-13.csv
Pv12.503	Fraser	49.1204	-123.2104	19	9	2012	Harbour seal	ONCKET	Oncorhynchus_keta	Chum_Salmon	1482	4456	1.0000	100.00	UBC	Thomas	dna_new_BC_2011-12-13.csv
Pv12.504	Fraser	49.1204	-123.2104	19	9	2012	Harbour seal	ONCKET	Oncorhynchus_keta	Chum_Salmon	348	1568	1.0000	100.00	UBC	Thomas	dna_new_BC_2011-12-13.csv
Pv12.505	Fraser	49.1204	-123.2104	19	9	2012	Harbour seal	ONCKET	Oncorhynchus_keta	Chum_Salmon	365	1800	1.0000	100.00	UBC	Thomas	dna_new_BC_2011-12-13.csv
Pv12.506	Fraser	49.1204	-123.2104	19	9	2012	Harbour seal	ONCTSH	Oncorhynchus_tshawytscha	Chinook_Salmon	308	4494	1.0000	100.00	UBC	Thomas	dna_new_BC_2011-12-13.csv
Pv12.507	Fraser	49.1204	-123.2104	19	9	2012	Harbour seal	CLUPAL	Clupea_pallasii	Pacific_Herring	2	NA	0.0339	3.39	UBC	Thomas	dna_new_BC_2011-12-13.csv
Pv12.507	Fraser	49.1204	-123.2104	19	9	2012	Harbour seal	LAMAYR	Lampetra_ayresii	River_Lamprey	1	NA	0.0169	1.69	UBC	Thomas	dna_new_BC_2011-12-13.csv
Pv12.507	Fraser	49.1204	-123.2104	19	9	2012	Harbour seal	ONCNER	Oncorhynchus_nerka	Sockeye_Salmon	NA	2	0.3729	37.29	UBC	Thomas	dna_new_BC_2011-12-13.csv
Pv12.507	Fraser	49.1204	-123.2104	19	9	2012	Harbour seal	ONCTSH	Oncorhynchus_tshawytscha	Chinook_Salmon	55	3	0.5593	55.93	UBC	Thomas	dna_new_BC_2011-12-13.csv
Pv12.507	Fraser	49.1204	-123.2104	19	9	2012	Harbour seal	GADCHA	Gadus_chalcogrammus	Walleye_Pollock	1	NA	0.0169	1.69	UBC	Thomas	dna_new_BC_2011-12-13.csv
Pv12.508	Fraser	49.1204	-123.2104	19	9	2012	Harbour seal	CLUPAL	Clupea_pallasii	Pacific_Herring	2	NA	0.0244	2.44	UBC	Thomas	dna_new_BC_2011-12-13.csv
Pv12.508	Fraser	49.1204	-123.2104	19	9	2012	Harbour seal	MERPRO	Merluccius_productus	Pacific_Hake	2	NA	0.0244	2.44	UBC	Thomas	dna_new_BC_2011-12-13.csv
Pv12.508	Fraser	49.1204	-123.2104	19	9	2012	Harbour seal	ONCKET	Oncorhynchus_keta	Chum_Salmon	76	NA	0.9268	92.68	UBC	Thomas	dna_new_BC_2011-12-13.csv
Pv12.508	Fraser	49.1204	-123.2104	19	9	2012	Harbour seal	GADCHA	Gadus_chalcogrammus	Walleye_Pollock	2	NA	0.0244	2.44	UBC	Thomas	dna_new_BC_2011-12-13.csv
Pv12.509	Fraser	49.1204	-123.2104	19	9	2012	Harbour seal	ONCKET	Oncorhynchus_keta	Chum_Salmon	182	2658	0.8081	80.81	UBC	Thomas	dna_new_BC_2011-12-13.csv
Pv12.509	Fraser	49.1204	-123.2104	19	9	2012	Harbour seal	ONCKIS	Oncorhynchus_kisutch	Coho_Salmon	130	631	0.1919	19.19	UBC	Thomas	dna_new_BC_2011-12-13.csv
Pv12.510	Fraser	49.1204	-123.2104	19	9	2012	Harbour seal	CLUPAL	Clupea_pallasii	Pacific_Herring	6	NA	0.0247	2.47	UBC	Thomas	dna_new_BC_2011-12-13.csv
Pv12.510	Fraser	49.1204	-123.2104	19	9	2012	Harbour seal	ONCKIS	Oncorhynchus_kisutch	Coho_Salmon	234	2401	0.9630	96.30	UBC	Thomas	dna_new_BC_2011-12-13.csv
Pv12.510	Fraser	49.1204	-123.2104	19	9	2012	Harbour seal	GADCHA	Gadus_chalcogrammus	Walleye_Pollock	3	NA	0.0123	1.23	UBC	Thomas	dna_new_BC_2011-12-13.csv
Pv12.511	Fraser	49.1204	-123.2104	19	9	2012	Harbour seal	ONCGOR	Oncorhynchus_gorbuscha	Pink_Salmon	173	NA	0.4651	46.51	UBC	Thomas	dna_new_BC_2011-12-13.csv
Pv12.511	Fraser	49.1204	-123.2104	19	9	2012	Harbour seal	ONCKET	Oncorhynchus_keta	Chum_Salmon	199	NA	0.5349	53.49	UBC	Thomas	dna_new_BC_2011-12-13.csv
Pv12.512	Fraser	49.1204	-123.2104	19	9	2012	Harbour seal	CLUPAL	Clupea_pallasii	Pacific_Herring	3	NA	0.0112	1.12	UBC	Thomas	dna_new_BC_2011-12-13.csv
Pv12.512	Fraser	49.1204	-123.2104	19	9	2012	Harbour seal	ONCKET	Oncorhynchus_keta	Chum_Salmon	76	890	0.2318	23.18	UBC	Thomas	dna_new_BC_2011-12-13.csv
Pv12.512	Fraser	49.1204	-123.2104	19	9	2012	Harbour seal	ONCTSH	Oncorhynchus_tshawytscha	Chinook_Salmon	186	2907	0.7571	75.71	UBC	Thomas	dna_new_BC_2011-12-13.csv
Pv12.513	Fraser	49.1204	-123.2104	19	9	2012	Harbour seal	ONCKET	Oncorhynchus_keta	Chum_Salmon	249	1016	0.2959	29.59	UBC	Thomas	dna_new_BC_2011-12-13.csv
Pv12.513	Fraser	49.1204	-123.2104	19	9	2012	Harbour seal	ONCNER	Oncorhynchus_nerka	Sockeye_Salmon	643	2418	0.7041	70.41	UBC	Thomas	dna_new_BC_2011-12-13.csv
Pv12.514	Fraser	49.1204	-123.2104	19	9	2012	Harbour seal	CLUPAL	Clupea_pallasii	Pacific_Herring	5	NA	0.0230	2.30	UBC	Thomas	dna_new_BC_2011-12-13.csv
Pv12.514	Fraser	49.1204	-123.2104	19	9	2012	Harbour seal	PARVET	Parophrys_vetulus	English_Sole	212	NA	0.9770	97.70	UBC	Thomas	dna_new_BC_2011-12-13.csv
Pv12.515	Belle Chain	48.8323	-123.1984	20	9	2012	Harbour seal	CLUPAL	Clupea_pallasii	Pacific_Herring	923	NA	1.0000	100.00	UBC	Thomas	dna_new_BC_2011-12-13.csv
Pv12.516	Belle Chain	48.8323	-123.1984	20	9	2012	Harbour seal	CLUPAL	Clupea_pallasii	Pacific_Herring	556	NA	1.0000	100.00	UBC	Thomas	dna_new_BC_2011-12-13.csv
Pv12.517	Belle Chain	48.8323	-123.1984	20	9	2012	Harbour seal	CLUPAL	Clupea_pallasii	Pacific_Herring	840	NA	1.0000	100.00	UBC	Thomas	dna_new_BC_2011-12-13.csv
Pv12.518	Belle Chain	48.8323	-123.1984	20	9	2012	Harbour seal	ONCTSH	Oncorhynchus_tshawytscha	Chinook_Salmon	NA	626	0.2223	22.23	UBC	Thomas	dna_new_BC_2011-12-13.csv
Pv12.518	Belle Chain	48.8323	-123.1984	20	9	2012	Harbour seal	ONCKET	Oncorhynchus_keta	Chum_Salmon	224	421	0.1495	14.95	UBC	Thomas	dna_new_BC_2011-12-13.csv
Pv12.518	Belle Chain	48.8323	-123.1984	20	9	2012	Harbour seal	ONCKIS	Oncorhynchus_kisutch	Coho_Salmon	131	270	0.0959	9.59	UBC	Thomas	dna_new_BC_2011-12-13.csv
Pv12.518	Belle Chain	48.8323	-123.1984	20	9	2012	Harbour seal	ONCCLA	Oncorhynchus_clarkii	Cutthroat_Trout	NA	250	0.0888	8.88	UBC	Thomas	dna_new_BC_2011-12-13.csv
Pv12.518	Belle Chain	48.8323	-123.1984	20	9	2012	Harbour seal	CLUPAL	Clupea_pallasii	Pacific_Herring	283	NA	0.4436	44.36	UBC	Thomas	dna_new_BC_2011-12-13.csv
Pv12.519	Belle Chain	48.8323	-123.1984	20	9	2012	Harbour seal	MERPRO	Merluccius_productus	Pacific_Hake	1	NA	0.0196	1.96	UBC	Thomas	dna_new_BC_2011-12-13.csv
Pv12.519	Belle Chain	48.8323	-123.1984	20	9	2012	Harbour seal	HYDCOL	Hydrolagus_colliei	Spotted_Ratfish	39	NA	0.7647	76.47	UBC	Thomas	dna_new_BC_2011-12-13.csv
Pv12.519	Belle Chain	48.8323	-123.1984	20	9	2012	Harbour seal	LAMAYR	Lampetra_ayresii	River_Lamprey	2	NA	0.0392	3.92	UBC	Thomas	dna_new_BC_2011-12-13.csv
Pv12.519	Belle Chain	48.8323	-123.1984	20	9	2012	Harbour seal	LUMSAG	Lumpenus_sagitta	Snake_Prickleback	1	NA	0.0196	1.96	UBC	Thomas	dna_new_BC_2011-12-13.csv
Pv12.519	Belle Chain	48.8323	-123.1984	20	9	2012	Harbour seal	ONCGOR	Oncorhynchus_gorbuscha	Pink_Salmon	NA	578	0.0392	3.92	UBC	Thomas	dna_new_BC_2011-12-13.csv
Pv12.519	Belle Chain	48.8323	-123.1984	20	9	2012	Harbour seal	CLUPAL	Clupea_pallasii	Pacific_Herring	6	NA	0.1176	11.76	UBC	Thomas	dna_new_BC_2011-12-13.csv
Pv12.520	Belle Chain	48.8323	-123.1984	20	9	2012	Harbour seal	CLUPAL	Clupea_pallasii	Pacific_Herring	1617	NA	0.3051	30.51	UBC	Thomas	dna_new_BC_2011-12-13.csv
Pv12.520	Belle Chain	48.8323	-123.1984	20	9	2012	Harbour seal	LAMAYR	Lampetra_ayresii	River_Lamprey	3683	NA	0.6949	69.49	UBC	Thomas	dna_new_BC_2011-12-13.csv
Pv12.522	Belle Chain	48.8323	-123.1984	20	9	2012	Harbour seal	GADMAC	Gadus_macrocephalus	Pacific_Cod	771	NA	1.0000	100.00	UBC	Thomas	dna_new_BC_2011-12-13.csv
Pv12.523	Belle Chain	48.8323	-123.1984	20	9	2012	Harbour seal	GADCHA	Gadus_chalcogrammus	Walleye_Pollock	284	NA	1.0000	100.00	UBC	Thomas	dna_new_BC_2011-12-13.csv
Pv12.524	Belle Chain	48.8323	-123.1984	20	9	2012	Harbour seal	ONCGOR	Oncorhynchus_gorbuscha	Pink_Salmon	76	NA	0.0493	4.93	UBC	Thomas	dna_new_BC_2011-12-13.csv
Pv12.524	Belle Chain	48.8323	-123.1984	20	9	2012	Harbour seal	GADCHA	Gadus_chalcogrammus	Walleye_Pollock	1466	NA	0.9507	95.07	UBC	Thomas	dna_new_BC_2011-12-13.csv
Pv12.526	Belle Chain	48.8323	-123.1984	20	9	2012	Harbour seal	GADCHA	Gadus_chalcogrammus	Walleye_Pollock	503	NA	1.0000	100.00	UBC	Thomas	dna_new_BC_2011-12-13.csv
Pv12.527	Belle Chain	48.8323	-123.1984	20	9	2012	Harbour seal	CLUPAL	Clupea_pallasii	Pacific_Herring	360	NA	1.0000	100.00	UBC	Thomas	dna_new_BC_2011-12-13.csv
Pv12.528	Belle Chain	48.8323	-123.1984	20	9	2012	Harbour seal	CLUPAL	Clupea_pallasii	Pacific_Herring	255	NA	0.8095	80.95	UBC	Thomas	dna_new_BC_2011-12-13.csv
Pv12.528	Belle Chain	48.8323	-123.1984	20	9	2012	Harbour seal	ONCKIS	Oncorhynchus_kisutch	Coho_Salmon	60	NA	0.1905	19.05	UBC	Thomas	dna_new_BC_2011-12-13.csv
Pv12.530	Belle Chain	48.8323	-123.1984	20	9	2012	Harbour seal	GADCHA	Gadus_chalcogrammus	Walleye_Pollock	2938	NA	1.0000	100.00	UBC	Thomas	dna_new_BC_2011-12-13.csv
Pv12.531	Belle Chain	48.8323	-123.1984	20	9	2012	Harbour seal	CLUPAL	Clupea_pallasii	Pacific_Herring	503	NA	0.6584	65.84	UBC	Thomas	dna_new_BC_2011-12-13.csv
Pv12.531	Belle Chain	48.8323	-123.1984	20	9	2012	Harbour seal	ONCKET	Oncorhynchus_keta	Chum_Salmon	137	969	0.1244	12.44	UBC	Thomas	dna_new_BC_2011-12-13.csv
Pv12.531	Belle Chain	48.8323	-123.1984	20	9	2012	Harbour seal	ONCKIS	Oncorhynchus_kisutch	Coho_Salmon	124	686	0.0881	8.81	UBC	Thomas	dna_new_BC_2011-12-13.csv
Pv12.531	Belle Chain	48.8323	-123.1984	20	9	2012	Harbour seal	ONCTSH	Oncorhynchus_tshawytscha	Chinook_Salmon	NA	1005	0.1291	12.91	UBC	Thomas	dna_new_BC_2011-12-13.csv
Pv12.532	Belle Chain	48.8323	-123.1984	20	9	2012	Harbour seal	BERMAG	Berryteuthis_magister	Magister_Armhook_Squid	97	NA	0.1329	13.29	UBC	Thomas	dna_new_BC_2011-12-13.csv
Pv12.532	Belle Chain	48.8323	-123.1984	20	9	2012	Harbour seal	CLUPAL	Clupea_pallasii	Pacific_Herring	603	NA	0.8260	82.60	UBC	Thomas	dna_new_BC_2011-12-13.csv
Pv12.532	Belle Chain	48.8323	-123.1984	20	9	2012	Harbour seal	LAMAYR	Lampetra_ayresii	River_Lamprey	30	NA	0.0411	4.11	UBC	Thomas	dna_new_BC_2011-12-13.csv
Pv12.533	Belle Chain	48.8323	-123.1984	20	9	2012	Harbour seal	BERMAG	Berryteuthis_magister	Magister_Armhook_Squid	14	NA	0.0184	1.84	UBC	Thomas	dna_new_BC_2011-12-13.csv
Pv12.533	Belle Chain	48.8323	-123.1984	20	9	2012	Harbour seal	CLUPAL	Clupea_pallasii	Pacific_Herring	748	NA	0.9816	98.16	UBC	Thomas	dna_new_BC_2011-12-13.csv
Pv12.534	Belle Chain	48.8323	-123.1984	20	9	2012	Harbour seal	CLUPAL	Clupea_pallasii	Pacific_Herring	1423	NA	1.0000	100.00	UBC	Thomas	dna_new_BC_2011-12-13.csv
Pv12.535	Belle Chain	48.8323	-123.1984	20	9	2012	Harbour seal	CLUPAL	Clupea_pallasii	Pacific_Herring	1232	NA	1.0000	100.00	UBC	Thomas	dna_new_BC_2011-12-13.csv
Pv12.536	Belle Chain	48.8323	-123.1984	20	9	2012	Harbour seal	CLUPAL	Clupea_pallasii	Pacific_Herring	540	NA	1.0000	100.00	UBC	Thomas	dna_new_BC_2011-12-13.csv
Pv12.537	Belle Chain	48.8323	-123.1984	20	9	2012	Harbour seal	AMMHEX	Ammodytes_hexapterus	Pacific_Sand_Lance	20	NA	0.0110	1.10	UBC	Thomas	dna_new_BC_2011-12-13.csv
Pv12.537	Belle Chain	48.8323	-123.1984	20	9	2012	Harbour seal	CLUPAL	Clupea_pallasii	Pacific_Herring	879	NA	0.4854	48.54	UBC	Thomas	dna_new_BC_2011-12-13.csv
Pv12.537	Belle Chain	48.8323	-123.1984	20	9	2012	Harbour seal	LAMAYR	Lampetra_ayresii	River_Lamprey	893	NA	0.4931	49.31	UBC	Thomas	dna_new_BC_2011-12-13.csv
Pv12.537	Belle Chain	48.8323	-123.1984	20	9	2012	Harbour seal	SQUACA	Squalus_acanthias	Spiny_Dogfish	19	NA	0.0105	1.05	UBC	Thomas	dna_new_BC_2011-12-13.csv
Pv12.538	Belle Chain	48.8323	-123.1984	20	9	2012	Harbour seal	MERPRO	Merluccius_productus	Pacific_Hake	83	NA	0.2538	25.38	UBC	Thomas	dna_new_BC_2011-12-13.csv
Pv12.538	Belle Chain	48.8323	-123.1984	20	9	2012	Harbour seal	CLUPAL	Clupea_pallasii	Pacific_Herring	244	NA	0.7462	74.62	UBC	Thomas	dna_new_BC_2011-12-13.csv
Pv12.539	Belle Chain	48.8323	-123.1984	20	9	2012	Harbour seal	GADMAC	Gadus_macrocephalus	Pacific_Cod	1	NA	0.0172	1.72	UBC	Thomas	dna_new_BC_2011-12-13.csv
Pv12.539	Belle Chain	48.8323	-123.1984	20	9	2012	Harbour seal	CLUPAL	Clupea_pallasii	Pacific_Herring	3	NA	0.0517	5.17	UBC	Thomas	dna_new_BC_2011-12-13.csv
Pv12.539	Belle Chain	48.8323	-123.1984	20	9	2012	Harbour seal	HYDCOL	Hydrolagus_colliei	Spotted_Ratfish	49	NA	0.8448	84.48	UBC	Thomas	dna_new_BC_2011-12-13.csv
Pv12.539	Belle Chain	48.8323	-123.1984	20	9	2012	Harbour seal	MERPRO	Merluccius_productus	Pacific_Hake	2	NA	0.0345	3.45	UBC	Thomas	dna_new_BC_2011-12-13.csv
Pv12.539	Belle Chain	48.8323	-123.1984	20	9	2012	Harbour seal	ONCKET	Oncorhynchus_keta	Chum_Salmon	1	NA	0.0172	1.72	UBC	Thomas	dna_new_BC_2011-12-13.csv
Pv12.539	Belle Chain	48.8323	-123.1984	20	9	2012	Harbour seal	OPHELO	Ophiodon_elongatus	Lingcod	1	NA	0.0172	1.72	UBC	Thomas	dna_new_BC_2011-12-13.csv
Pv12.539	Belle Chain	48.8323	-123.1984	20	9	2012	Harbour seal	GADCHA	Gadus_chalcogrammus	Walleye_Pollock	1	NA	0.0172	1.72	UBC	Thomas	dna_new_BC_2011-12-13.csv
Pv12.540	Belle Chain	48.8323	-123.1984	20	9	2012	Harbour seal	CLUPAL	Clupea_pallasii	Pacific_Herring	709	NA	1.0000	100.00	UBC	Thomas	dna_new_BC_2011-12-13.csv
Pv12.541	Belle Chain	48.8323	-123.1984	20	9	2012	Harbour seal	CLUPAL	Clupea_pallasii	Pacific_Herring	1311	NA	0.9200	92.00	UBC	Thomas	dna_new_BC_2011-12-13.csv
Pv12.541	Belle Chain	48.8323	-123.1984	20	9	2012	Harbour seal	ENGMOR	Engraulis_mordax	Northern_Anchovy	24	NA	0.0168	1.68	UBC	Thomas	dna_new_BC_2011-12-13.csv
Pv12.541	Belle Chain	48.8323	-123.1984	20	9	2012	Harbour seal	GADCHA	Gadus_chalcogrammus	Walleye_Pollock	90	NA	0.0632	6.32	UBC	Thomas	dna_new_BC_2011-12-13.csv
Pv12.542	Belle Chain	48.8323	-123.1984	20	9	2012	Harbour seal	CLUPAL	Clupea_pallasii	Pacific_Herring	324	NA	1.0000	100.00	UBC	Thomas	dna_new_BC_2011-12-13.csv
Pv12.543	Belle Chain	48.8323	-123.1984	20	9	2012	Harbour seal	ALOSAP	Alosa_sapidissima	American_Shad	255	NA	0.6174	61.74	UBC	Thomas	dna_new_BC_2011-12-13.csv
Pv12.543	Belle Chain	48.8323	-123.1984	20	9	2012	Harbour seal	CLUPAL	Clupea_pallasii	Pacific_Herring	124	NA	0.3002	30.02	UBC	Thomas	dna_new_BC_2011-12-13.csv
Pv12.543	Belle Chain	48.8323	-123.1984	20	9	2012	Harbour seal	GADCHA	Gadus_chalcogrammus	Walleye_Pollock	34	NA	0.0823	8.23	UBC	Thomas	dna_new_BC_2011-12-13.csv
Pv12.544	Belle Chain	48.8323	-123.1984	20	9	2012	Harbour seal	CLUPAL	Clupea_pallasii	Pacific_Herring	1014	NA	0.7305	73.05	UBC	Thomas	dna_new_BC_2011-12-13.csv
Pv12.544	Belle Chain	48.8323	-123.1984	20	9	2012	Harbour seal	MERPRO	Merluccius_productus	Pacific_Hake	374	NA	0.2695	26.95	UBC	Thomas	dna_new_BC_2011-12-13.csv
Pv12.545	Belle Chain	48.8323	-123.1984	20	9	2012	Harbour seal	MERPRO	Merluccius_productus	Pacific_Hake	84	NA	0.0378	3.78	UBC	Thomas	dna_new_BC_2011-12-13.csv
Pv12.545	Belle Chain	48.8323	-123.1984	20	9	2012	Harbour seal	GADCHA	Gadus_chalcogrammus	Walleye_Pollock	2137	NA	0.9622	96.22	UBC	Thomas	dna_new_BC_2011-12-13.csv
Pv12.546	Belle Chain	48.8323	-123.1984	20	9	2012	Harbour seal	CLUPAL	Clupea_pallasii	Pacific_Herring	916	NA	1.0000	100.00	UBC	Thomas	dna_new_BC_2011-12-13.csv
Pv12.548	Belle Chain	48.8323	-123.1984	20	9	2012	Harbour seal	GADCHA	Gadus_chalcogrammus	Walleye_Pollock	1018	NA	1.0000	100.00	UBC	Thomas	dna_new_BC_2011-12-13.csv
Pv12.549	Belle Chain	48.8323	-123.1984	20	9	2012	Harbour seal	ENGMOR	Engraulis_mordax	Northern_Anchovy	14	NA	0.0195	1.95	UBC	Thomas	dna_new_BC_2011-12-13.csv
Pv12.549	Belle Chain	48.8323	-123.1984	20	9	2012	Harbour seal	ONCNER	Oncorhynchus_nerka	Sockeye_Salmon	602	NA	0.8396	83.96	UBC	Thomas	dna_new_BC_2011-12-13.csv
Pv12.549	Belle Chain	48.8323	-123.1984	20	9	2012	Harbour seal	GADCHA	Gadus_chalcogrammus	Walleye_Pollock	101	NA	0.1409	14.09	UBC	Thomas	dna_new_BC_2011-12-13.csv
Pv12.550	Belle Chain	48.8323	-123.1984	20	9	2012	Harbour seal	ONCGOR	Oncorhynchus_gorbuscha	Pink_Salmon	323	NA	0.2249	22.49	UBC	Thomas	dna_new_BC_2011-12-13.csv
Pv12.550	Belle Chain	48.8323	-123.1984	20	9	2012	Harbour seal	ONCNER	Oncorhynchus_nerka	Sockeye_Salmon	294	NA	0.2047	20.47	UBC	Thomas	dna_new_BC_2011-12-13.csv
Pv12.550	Belle Chain	48.8323	-123.1984	20	9	2012	Harbour seal	ONCTSH	Oncorhynchus_tshawytscha	Chinook_Salmon	143	NA	0.0996	9.96	UBC	Thomas	dna_new_BC_2011-12-13.csv
Pv12.550	Belle Chain	48.8323	-123.1984	20	9	2012	Harbour seal	GADCHA	Gadus_chalcogrammus	Walleye_Pollock	439	NA	0.3057	30.57	UBC	Thomas	dna_new_BC_2011-12-13.csv
Pv12.550	Belle Chain	48.8323	-123.1984	20	9	2012	Harbour seal	ONCKIS	Oncorhynchus_kisutch	Coho_Salmon	237	NA	0.1650	16.50	UBC	Thomas	dna_new_BC_2011-12-13.csv
Pv12.551	Belle Chain	48.8323	-123.1984	20	9	2012	Harbour seal	CLUPAL	Clupea_pallasii	Pacific_Herring	940	NA	1.0000	100.00	UBC	Thomas	dna_new_BC_2011-12-13.csv
Pv12.552	Belle Chain	48.8323	-123.1984	20	9	2012	Harbour seal	CLUPAL	Clupea_pallasii	Pacific_Herring	81	NA	0.0706	7.06	UBC	Thomas	dna_new_BC_2011-12-13.csv
Pv12.552	Belle Chain	48.8323	-123.1984	20	9	2012	Harbour seal	ONCNER	Oncorhynchus_nerka	Sockeye_Salmon	915	NA	0.7977	79.77	UBC	Thomas	dna_new_BC_2011-12-13.csv
Pv12.552	Belle Chain	48.8323	-123.1984	20	9	2012	Harbour seal	ONCTSH	Oncorhynchus_tshawytscha	Chinook_Salmon	23	NA	0.0201	2.01	UBC	Thomas	dna_new_BC_2011-12-13.csv
Pv12.552	Belle Chain	48.8323	-123.1984	20	9	2012	Harbour seal	GADCHA	Gadus_chalcogrammus	Walleye_Pollock	128	NA	0.1116	11.16	UBC	Thomas	dna_new_BC_2011-12-13.csv
Pv12.553	Belle Chain	48.8323	-123.1984	20	9	2012	Harbour seal	CLUPAL	Clupea_pallasii	Pacific_Herring	176	NA	0.9412	94.12	UBC	Thomas	dna_new_BC_2011-12-13.csv
Pv12.553	Belle Chain	48.8323	-123.1984	20	9	2012	Harbour seal	ONCKET	Oncorhynchus_keta	Chum_Salmon	NA	5	0.0420	4.20	UBC	Thomas	dna_new_BC_2011-12-13.csv
Pv12.553	Belle Chain	48.8323	-123.1984	20	9	2012	Harbour seal	ONCTSH	Oncorhynchus_tshawytscha	Chinook_Salmon	11	2	0.0168	1.68	UBC	Thomas	dna_new_BC_2011-12-13.csv
Pv12.554	Belle Chain	48.8323	-123.1984	20	9	2012	Harbour seal	CLUPAL	Clupea_pallasii	Pacific_Herring	38	NA	0.0124	1.24	UBC	Thomas	dna_new_BC_2011-12-13.csv
Pv12.554	Belle Chain	48.8323	-123.1984	20	9	2012	Harbour seal	GADCHA	Gadus_chalcogrammus	Walleye_Pollock	3019	NA	0.9876	98.76	UBC	Thomas	dna_new_BC_2011-12-13.csv
Pv12.555	Belle Chain	48.8323	-123.1984	20	9	2012	Harbour seal	ONCKET	Oncorhynchus_keta	Chum_Salmon	193	5	0.0254	2.54	UBC	Thomas	dna_new_BC_2011-12-13.csv
Pv12.555	Belle Chain	48.8323	-123.1984	20	9	2012	Harbour seal	ONCTSH	Oncorhynchus_tshawytscha	Chinook_Salmon	352	192	0.9746	97.46	UBC	Thomas	dna_new_BC_2011-12-13.csv
Pv12.556	Belle Chain	48.8323	-123.1984	20	9	2012	Harbour seal	TRITRI	Trichodon_trichodon	Pacific_Sandfish	11	NA	0.0144	1.44	UBC	Thomas	dna_new_BC_2011-12-13.csv
Pv12.556	Belle Chain	48.8323	-123.1984	20	9	2012	Harbour seal	CLUPAL	Clupea_pallasii	Pacific_Herring	647	NA	0.8491	84.91	UBC	Thomas	dna_new_BC_2011-12-13.csv
Pv12.556	Belle Chain	48.8323	-123.1984	20	9	2012	Harbour seal	LAMAYR	Lampetra_ayresii	River_Lamprey	104	NA	0.1365	13.65	UBC	Thomas	dna_new_BC_2011-12-13.csv
Pv12.557	Belle Chain	48.8323	-123.1984	20	9	2012	Harbour seal	CLUPAL	Clupea_pallasii	Pacific_Herring	245	NA	0.8448	84.48	UBC	Thomas	dna_new_BC_2011-12-13.csv
Pv12.557	Belle Chain	48.8323	-123.1984	20	9	2012	Harbour seal	LAMAYR	Lampetra_ayresii	River_Lamprey	45	NA	0.1552	15.52	UBC	Thomas	dna_new_BC_2011-12-13.csv
Pv12.558	Belle Chain	48.8323	-123.1984	20	9	2012	Harbour seal	GADCHA	Gadus_chalcogrammus	Walleye_Pollock	3721	NA	1.0000	100.00	UBC	Thomas	dna_new_BC_2011-12-13.csv
Pv12.559	Belle Chain	48.8323	-123.1984	20	9	2012	Harbour seal	AMMHEX	Ammodytes_hexapterus	Pacific_Sand_Lance	165	NA	0.0293	2.93	UBC	Thomas	dna_new_BC_2011-12-13.csv
Pv12.559	Belle Chain	48.8323	-123.1984	20	9	2012	Harbour seal	CLUPAL	Clupea_pallasii	Pacific_Herring	1743	NA	0.3098	30.98	UBC	Thomas	dna_new_BC_2011-12-13.csv
Pv12.559	Belle Chain	48.8323	-123.1984	20	9	2012	Harbour seal	LAMAYR	Lampetra_ayresii	River_Lamprey	3718	NA	0.6609	66.09	UBC	Thomas	dna_new_BC_2011-12-13.csv
[truncated: 9,642 more rows]
